# Supplementary material
Source: MDPI journal article supplement (https://www.mdpi.com/2076-3263/11/12/505)
Supplement: s1 [file s1]

Archive with 6 entries (6 files):
- S1_Theria_g diffusion master.xlsx
- S2 Theria_g grt comps combo.pdf
- S3_Allinfomaster.xlsx
- S3_Allinfomaster_submiss2.xlsx
- S4_All psuedos and reactions_pub.xlsx
- S5_CMM theria-g.xlsx
