# Supplementary material
Source: MDPI journal article supplement (https://www.mdpi.com/2076-3263/11/12/505)
Supplement: s1 [file s1 › S1_Theria_g diffusion master.xlsx]

## Sheet: Path trajectories
Table S1.1. Specified Path B from Gaidies et al. (2008)
T (oC	P (bar)	t (50oC)	t(5oC)
446.18	3345.11	0	0
523.581	6935.51	1.54801	15.4802
560.045	9270.83	2.27729	22.7729
567.552	9739.58	2.42744	24.2744
577.107	10062.5	2.61854	26.1854
588.02	10145.8	2.83694	28.3694
601.335	9968.75	3.1031	31.0311
607.136	9625	3.21913	32.1913
610.1	9229.17	3.2784	32.784
606.795	8781.25	3.34497	33.4497
598.264	8250	3.51512	35.1512
551.915	5687.51	4.44211	44.4211
454.818	3210.71	6.38403	63.8404
Table S1.2. Theria_G specified Path hiT.
T (oC	P (bar)	t (50oC)	t(5oC)
446.18	3345.11	0	0
583.581	6935.51	2.74801	27.4801
620.045	9270.83	3.47729	34.7729
627.552	9739.58	3.62744	36.2744
637.107	10062.5	3.81854	38.1854
648.02	10145.8	4.03681	40.3681
661.335	9968.75	4.30311	43.0311
667.136	9625	4.41913	44.1913
670.1	9229.17	4.4784	44.784
666.795	8781.25	4.5445	45.445
658.264	8250	4.71512	47.1512
611.915	5687.51	5.64211	56.4211
514.818	3210.71	7.58404	75.8404
Table. S1.3. CSD specifications
	# of grts per radius class (grt/ccm)	radius
class 1	0.4	140
class 2	0.8	280
class 3	2.4	420
class 4	8	560
class 5	10.8	700
class 6	12	840
class 7	10	980
class 8	7.2	1120
class 9	2	1260
class 10	0.4	1400

## Sheet: B-5_1
Path B-5_1: Primary										Path B-5_1: Diffused
Shell	temperature (｡C)	pressure (bar)	tot.time (my)	radius (cm)	X(node) (cm)	Xfe	Xmg	Xmn	Xca	Shell	temperature (｡C)	pressure (bar)	tot.time (my)	radius (cm)	X(node) (cm)	Xfe	Xmg	Xmn	Xca
1	500.33	5857	0	0.00216214	0.00108107	0.462074	0.0241782	0.200559	0.313189	1	454.818	3210.71	53.0103	0.00216214	0.00108107	0.46219	0.0241811	0.20044	0.313189
2	500.33	5857	1.57893e-05	0.00301928	0.00259071	0.462075	0.0241782	0.200559	0.313189	2	454.818	3210.71	53.0103	0.00301928	0.00259071	0.462195	0.0241813	0.200435	0.313189
3	500.331	5857.02	8.42097e-05	0.00407605	0.00354767	0.462076	0.0241784	0.200557	0.313189	3	454.818	3210.71	53.0103	0.00407605	0.00354767	0.462201	0.0241816	0.200428	0.313189
4	500.331	5857.04	0.000184209	0.00504448	0.00456026	0.462078	0.0241786	0.200555	0.313189	4	454.818	3210.71	53.0103	0.00504448	0.00456026	0.462211	0.024182	0.200418	0.313189
5	500.332	5857.08	0.000336839	0.00606704	0.00555576	0.462081	0.0241788	0.200551	0.313189	5	454.818	3210.71	53.0103	0.00606704	0.00555576	0.462223	0.0241826	0.200405	0.313189
6	500.333	5857.13	0.000552626	0.00706345	0.00656525	0.462085	0.0241792	0.200546	0.313189	6	454.818	3210.71	53.0103	0.00706345	0.00656525	0.462238	0.0241833	0.200389	0.31319
7	500.335	5857.19	0.000842097	0.00808709	0.00757527	0.462092	0.0241797	0.200539	0.313189	7	454.818	3210.71	53.0103	0.00808709	0.00757527	0.462255	0.0241841	0.20037	0.31319
8	500.336	5857.28	0.00121578	0.00908224	0.00858466	0.462099	0.0241804	0.200531	0.31319	8	454.818	3210.71	53.0103	0.00908224	0.00858466	0.462276	0.0241852	0.200348	0.31319
9	500.339	5857.39	0.00168419	0.0100923	0.00958728	0.462109	0.0241812	0.20052	0.31319	9	454.818	3210.71	53.0103	0.0100923	0.00958728	0.4623	0.0241864	0.200322	0.313191
10	500.342	5857.52	0.00225787	0.0110925	0.0105924	0.462121	0.0241822	0.200506	0.313191	10	454.818	3210.71	53.0103	0.0110925	0.0105924	0.462328	0.0241879	0.200292	0.313192
11	500.345	5857.68	0.00294734	0.0120984	0.0115954	0.462135	0.0241834	0.20049	0.313191	11	454.818	3210.71	53.0103	0.0120984	0.0115954	0.46236	0.0241896	0.200258	0.313192
12	500.349	5857.87	0.00376312	0.0130999	0.0125991	0.462152	0.0241849	0.200471	0.313192	12	454.818	3210.71	53.0103	0.0130999	0.0125991	0.462397	0.0241917	0.200218	0.313193
13	500.354	5858.09	0.00471574	0.014101	0.0136004	0.462172	0.0241865	0.200449	0.313193	13	454.818	3210.71	53.0103	0.014101	0.0136004	0.462438	0.024194	0.200174	0.313194
14	500.359	5858.35	0.00581573	0.0150985	0.0145997	0.462195	0.0241885	0.200423	0.313194	14	454.818	3210.71	53.0103	0.0150985	0.0145997	0.462484	0.0241966	0.200124	0.313195
15	500.366	5858.65	0.00709467	0.0161039	0.0156012	0.462221	0.0241907	0.200393	0.313195	15	454.818	3210.71	53.0103	0.0161039	0.0156012	0.462537	0.0241996	0.200067	0.313197
16	500.373	5858.99	0.00858413	0.0171041	0.016604	0.462252	0.0241934	0.200359	0.313196	16	454.818	3210.71	53.0103	0.0171041	0.016604	0.462595	0.0242031	0.200003	0.313198
17	500.382	5859.39	0.0103052	0.0181029	0.0176035	0.462288	0.0241964	0.200318	0.313198	17	454.818	3210.71	53.0103	0.0181029	0.0176035	0.462661	0.0242071	0.199932	0.3132
18	500.392	5859.85	0.0122894	0.0190985	0.0186007	0.462329	0.0241999	0.200272	0.313199	18	454.818	3210.71	53.0103	0.0190985	0.0186007	0.462734	0.0242115	0.199853	0.313202
19	500.403	5860.38	0.0145788	0.0201007	0.0195996	0.462376	0.0242039	0.200218	0.313202	19	454.818	3210.71	53.0103	0.0201007	0.0195996	0.462815	0.0242166	0.199764	0.313204
20	500.416	5860.99	0.0172051	0.0211082	0.0206045	0.462431	0.0242085	0.200156	0.313204	20	454.818	3210.71	53.0103	0.0211082	0.0206045	0.462906	0.0242223	0.199665	0.313207
21	500.431	5861.69	0.0202209	0.0221081	0.0216081	0.462493	0.0242139	0.200086	0.313206	21	454.818	3210.71	53.0103	0.0221081	0.0216081	0.463007	0.0242287	0.199555	0.313209
22	500.448	5862.48	0.0236156	0.023108	0.022608	0.462564	0.0242199	0.200007	0.31321	22	454.818	3210.71	53.0103	0.023108	0.022608	0.463118	0.0242359	0.199434	0.313213
23	500.468	5863.36	0.0274313	0.024108	0.023608	0.462643	0.0242266	0.199918	0.313213	23	454.818	3210.71	53.0103	0.024108	0.023608	0.463241	0.0242439	0.199299	0.313216
24	500.489	5864.35	0.0317102	0.0251069	0.0246075	0.462731	0.0242342	0.199818	0.313217	24	454.818	3210.71	53.0103	0.0251069	0.0246075	0.463377	0.0242528	0.19915	0.31322
25	500.513	5865.46	0.0364839	0.0261071	0.025607	0.46283	0.0242426	0.199706	0.313221	25	454.818	3210.71	53.0103	0.0261071	0.025607	0.463527	0.0242626	0.198986	0.313225
26	500.539	5866.69	0.0417838	0.0271088	0.026608	0.46294	0.0242519	0.199582	0.313225	26	454.818	3210.71	53.0103	0.0271088	0.026608	0.463692	0.0242736	0.198805	0.31323
27	500.569	5868.05	0.0476311	0.0281071	0.027608	0.463062	0.0242623	0.199445	0.313231	27	454.818	3210.71	53.0103	0.0281071	0.027608	0.463874	0.0242857	0.198605	0.313235
28	500.601	5869.54	0.0540679	0.0291061	0.0286066	0.463195	0.0242737	0.199295	0.313236	28	454.818	3210.71	53.0103	0.0291061	0.0286066	0.464073	0.0242991	0.198387	0.313241
29	500.636	5871.19	0.0611678	0.0301049	0.0296055	0.463343	0.0242862	0.199129	0.313243	29	454.818	3210.71	53.0103	0.0301049	0.0296055	0.464292	0.0243138	0.198146	0.313248
30	500.676	5873.01	0.0690256	0.0311042	0.0306045	0.463506	0.0243001	0.198945	0.313249	30	454.818	3210.71	53.0103	0.0311042	0.0306045	0.464532	0.0243301	0.197883	0.313255
31	500.719	5875.03	0.0777466	0.0321047	0.0316045	0.463687	0.0243156	0.19874	0.313257	31	454.818	3210.71	53.0103	0.0321047	0.0316045	0.464795	0.024348	0.197594	0.313263
32	500.767	5877.27	0.0874149	0.0331057	0.0326052	0.463888	0.0243327	0.198514	0.313265	32	454.818	3210.71	53.0103	0.0331057	0.0326052	0.465083	0.0243678	0.197277	0.313272
33	500.821	5879.76	0.0981254	0.0341055	0.0336056	0.46411	0.0243517	0.198263	0.313275	33	454.818	3210.71	53.0103	0.0341055	0.0336056	0.465398	0.0243896	0.19693	0.313282
34	500.88	5882.5	0.109952	0.0351046	0.0346051	0.464356	0.0243727	0.197986	0.313285	34	454.818	3210.71	53.0103	0.0351046	0.0346051	0.465741	0.0244135	0.196552	0.313293
35	500.945	5885.53	0.123009	0.0361054	0.035605	0.464628	0.0243959	0.19768	0.313296	35	454.818	3210.71	53.0103	0.0361054	0.035605	0.466116	0.0244398	0.19614	0.313305
36	501.017	5888.86	0.137383	0.0371047	0.0366051	0.464926	0.0244215	0.197344	0.313309	36	454.818	3210.71	53.0103	0.0371047	0.0366051	0.466525	0.0244686	0.195689	0.313317
37	501.096	5892.52	0.153146	0.0381039	0.0376043	0.465254	0.0244496	0.196974	0.313322	37	454.818	3210.71	53.0103	0.0381039	0.0376043	0.46697	0.0245	0.195199	0.313331
38	501.182	5896.52	0.170414	0.039104	0.0386039	0.465614	0.0244803	0.196569	0.313337	38	454.818	3210.71	53.0103	0.039104	0.0386039	0.467454	0.0245344	0.194665	0.313347
39	501.277	5900.9	0.189261	0.0401037	0.0396038	0.466006	0.024514	0.196127	0.313353	39	454.818	3210.71	53.0103	0.0401037	0.0396038	0.467982	0.0245719	0.194083	0.313363
40	501.379	5905.66	0.209782	0.0411036	0.0406037	0.466434	0.0245507	0.195646	0.31337	40	454.818	3210.71	53.0103	0.0411036	0.0406037	0.468555	0.0246128	0.193451	0.313381
41	501.491	5910.82	0.23205	0.0421037	0.0416037	0.466898	0.0245905	0.195123	0.313389	41	454.818	3210.71	53.0103	0.0421037	0.0416037	0.469179	0.0246573	0.192764	0.3134
42	501.611	5916.41	0.256171	0.0431041	0.0426039	0.467402	0.0246338	0.194556	0.313409	42	454.818	3210.71	53.0103	0.0431041	0.0426039	0.469856	0.0247057	0.192018	0.313421
43	501.741	5922.46	0.282218	0.0441027	0.0436034	0.467945	0.0246806	0.193944	0.31343	43	454.818	3210.71	53.0103	0.0441027	0.0436034	0.470589	0.0247584	0.191209	0.313443
44	501.883	5929	0.310434	0.0451027	0.0446027	0.468534	0.0247314	0.193281	0.313453	44	454.818	3210.71	53.0103	0.0451027	0.0446027	0.471385	0.0248156	0.190333	0.313466
45	502.036	5936.12	0.341112	0.0461028	0.0456028	0.469176	0.0247868	0.192559	0.313478	45	454.818	3210.71	53.0103	0.0461028	0.0456028	0.472248	0.024878	0.189383	0.313491
46	502.203	5943.86	0.374507	0.0471028	0.0466028	0.469875	0.0248472	0.191773	0.313505	46	454.818	3210.71	53.0103	0.0471028	0.0466028	0.473182	0.0249459	0.188355	0.313517
47	502.385	5952.3	0.410912	0.0481029	0.0476029	0.470637	0.0249133	0.190916	0.313534	47	454.818	3210.71	53.0103	0.0481029	0.0476029	0.474194	0.0250198	0.187243	0.313543
48	502.583	5961.51	0.45058	0.049103	0.048603	0.471469	0.0249854	0.189981	0.313565	48	454.818	3210.71	53.0103	0.049103	0.048603	0.475291	0.0251004	0.186043	0.313565
49	502.799	5971.53	0.493785	0.050103	0.049603	0.472376	0.0250642	0.188962	0.313598	49	454.818	3210.71	53.0103	0.050103	0.049603	0.476481	0.0251886	0.18475	0.313581
50	503.034	5982.43	0.540779	0.0511031	0.0506031	0.473363	0.0251503	0.187853	0.313634	50	454.818	3210.71	53.0103	0.0511031	0.0506031	0.477773	0.0252855	0.183357	0.313585
51	503.289	5994.26	0.591805	0.0521031	0.0516031	0.474437	0.025244	0.186648	0.313672	51	454.818	3210.71	53.0103	0.0521031	0.0516031	0.479178	0.0253924	0.181861	0.313568
52	503.566	6007.09	0.647104	0.0531031	0.0526031	0.475602	0.0253461	0.18534	0.313712	52	454.818	3210.71	53.0103	0.0531031	0.0526031	0.48071	0.0255111	0.180256	0.313523
53	503.865	6020.95	0.706898	0.054103	0.053603	0.476863	0.0254569	0.183925	0.313755	53	454.818	3210.71	53.0103	0.054103	0.053603	0.482379	0.0256431	0.178537	0.313441
54	504.011	6027.75	0.736193	0.054395	0.054249	0.477482	0.0255113	0.183229	0.313778	54	454.818	3210.71	53.0103	0.054395	0.054249	0.483535	0.0257363	0.177364	0.313365
55	504.324	6042.26	0.798776	0.0553948	0.0548949	0.478807	0.0256359	0.181973	0.313584	55	454.818	3210.71	53.0103	0.0553948	0.0548949	0.484753	0.0258358	0.17614	0.313271
56	504.728	6060.99	0.879497	0.0563947	0.0558948	0.48052	0.0257974	0.180348	0.313334	56	454.818	3210.71	53.0103	0.0563947	0.0558948	0.486768	0.0260029	0.17414	0.313089
57	505.161	6081.06	0.966048	0.0573948	0.0568948	0.482361	0.0259717	0.178601	0.313066	57	454.818	3210.71	53.0103	0.0573948	0.0568948	0.488941	0.026186	0.172009	0.312864
58	505.623	6102.53	1.0586	0.0583942	0.0578945	0.484334	0.0261592	0.176727	0.31278	58	454.818	3210.71	53.0103	0.0583942	0.0578945	0.491273	0.0263852	0.16974	0.312602
59	506.118	6125.48	1.15756	0.0593941	0.0588941	0.486449	0.0263612	0.174715	0.312475	59	454.818	3210.71	53.0103	0.0593941	0.0588941	0.493765	0.0266006	0.167328	0.312307
60	506.647	6150.01	1.26335	0.0603942	0.0598941	0.488715	0.0265787	0.172557	0.312148	60	454.818	3210.71	53.0103	0.0603942	0.0598941	0.496417	0.0268327	0.164768	0.311982
61	507.212	6176.22	1.37632	0.0613944	0.0608943	0.491143	0.0268129	0.170243	0.3118	61	454.818	3210.71	53.0103	0.0613944	0.0608943	0.499229	0.0270819	0.162057	0.311632
62	507.815	6204.17	1.49684	0.0623944	0.0618944	0.49374	0.0270649	0.167766	0.311429	62	454.818	3210.71	53.0103	0.0623944	0.0618944	0.502201	0.027349	0.159193	0.311257
63	508.456	6233.93	1.62515	0.0633944	0.0628944	0.496514	0.0273356	0.165116	0.311035	63	454.818	3210.71	53.0103	0.0633944	0.0628944	0.505333	0.0276345	0.156175	0.310857
64	509.138	6265.56	1.76152	0.0643944	0.0638944	0.499471	0.0276262	0.162287	0.310616	64	454.818	3210.71	53.0103	0.0643944	0.0638944	0.508622	0.0279395	0.153005	0.310434
65	509.861	6299.1	1.90613	0.0653945	0.0648945	0.502617	0.0279375	0.159273	0.310172	65	454.818	3210.71	53.0103	0.0653945	0.0648945	0.512066	0.0282645	0.149683	0.309987
66	510.626	6334.58	2.05912	0.0663945	0.0658945	0.505957	0.0282706	0.156068	0.309704	66	454.818	3210.71	53.0103	0.0663945	0.0658945	0.515661	0.0286103	0.146213	0.309515
67	511.433	6372.01	2.2205	0.0673942	0.0668943	0.509493	0.028626	0.152671	0.30921	67	454.818	3210.71	53.0103	0.0673942	0.0668943	0.519402	0.0289773	0.142601	0.30902
68	512.282	6411.4	2.39031	0.0683943	0.0678943	0.513228	0.0290047	0.149077	0.308691	68	454.818	3210.71	53.0103	0.0683943	0.0678943	0.52328	0.029366	0.138853	0.308501
69	513.173	6452.73	2.5685	0.0693943	0.0688943	0.517159	0.0294073	0.145286	0.308147	69	454.818	3210.71	53.0103	0.0693943	0.0688943	0.527288	0.0297769	0.134978	0.307958
70	514.105	6495.94	2.75484	0.0703944	0.0698943	0.521287	0.0298341	0.141299	0.30758	70	454.818	3210.71	53.0103	0.0703944	0.0698943	0.531412	0.03021	0.130985	0.307393
71	515.076	6541.01	2.94912	0.0713943	0.0708943	0.525605	0.0302856	0.13712	0.306989	71	454.818	3210.71	53.0103	0.0713943	0.0708943	0.535641	0.0306653	0.126886	0.306807
72	516.085	6587.83	3.151	0.0723943	0.0718943	0.530109	0.0307619	0.132754	0.306375	72	454.818	3210.71	53.0103	0.0723943	0.0718943	0.539959	0.0311427	0.122695	0.306203
73	517.131	6636.32	3.36007	0.0733941	0.0728942	0.534789	0.0312631	0.128207	0.305741	73	454.818	3210.71	53.0103	0.0733941	0.0728942	0.544348	0.0316413	0.118425	0.305586
74	518.211	6686.42	3.57606	0.074394	0.073894	0.539639	0.0317895	0.123485	0.305087	74	454.818	3210.71	53.0103	0.074394	0.073894	0.548786	0.0321601	0.114092	0.304962
75	519.323	6738.03	3.79859	0.075394	0.074894	0.544651	0.0323412	0.118595	0.304414	75	454.818	3210.71	53.0103	0.075394	0.074894	0.553252	0.0326968	0.10971	0.304341
76	520.466	6791.05	4.02718	0.076394	0.075894	0.549812	0.0329182	0.113547	0.303723	76	454.818	3210.71	53.0103	0.076394	0.075894	0.557718	0.033248	0.105296	0.303737
77	521.637	6845.34	4.26126	0.077394	0.076894	0.555109	0.0335201	0.108354	0.303017	77	454.818	3210.71	53.0103	0.077394	0.076894	0.562157	0.0338089	0.100867	0.303167
78	522.831	6900.73	4.5001	0.0783939	0.077894	0.560522	0.0341463	0.103034	0.302297	78	454.818	3210.71	53.0103	0.0783939	0.077894	0.566537	0.0343729	0.0964388	0.302651
79	524.01	6963.02	4.73595	0.079394	0.078894	0.5659	0.0347692	0.0975964	0.301735	79	454.818	3210.71	53.0103	0.079394	0.078894	0.570828	0.0349326	0.0920275	0.302212
80	525.146	7035.8	4.96321	0.0803941	0.0798941	0.57113	0.0353692	0.0920622	0.301439	80	454.818	3210.71	53.0103	0.0803941	0.0798941	0.574996	0.0354795	0.0876489	0.301876
81	526.291	7109.1	5.19214	0.0813941	0.0808941	0.576399	0.0359865	0.0864771	0.301138	81	454.818	3210.71	53.0103	0.0813941	0.0808941	0.579002	0.0360059	0.0833177	0.301674
82	527.439	7182.64	5.42179	0.0823941	0.0818941	0.581678	0.0366196	0.0808698	0.300833	82	454.818	3210.71	53.0103	0.0823941	0.0818941	0.582803	0.0365065	0.0790473	0.301643
83	528.586	7256.1	5.65117	0.083394	0.082894	0.586936	0.0372665	0.0752714	0.300526	83	454.818	3210.71	53.0103	0.083394	0.082894	0.586351	0.0369805	0.0748496	0.301819
84	528.941	7278.82	5.72212	0.0834704	0.0834322	0.588564	0.0374693	0.0735362	0.300431	84	454.818	3210.71	53.0103	0.0834704	0.0834322	0.588137	0.0372266	0.0726251	0.302011
85	528.944	7279.03	5.72278	0.0844626	0.0839665	0.589482	0.0374016	0.0726628	0.300453	85	454.818	3210.71	53.0103	0.0844626	0.0839665	0.589822	0.0374661	0.0704425	0.30227
86	528.948	7279.25	5.72346	0.0851683	0.0848155	0.590458	0.0373297	0.0717357	0.300477	86	454.818	3210.71	53.0103	0.0851683	0.0848155	0.592309	0.0378398	0.0670305	0.302821
87	531.177	7421.99	6.16921	0.0861683	0.0856683	0.594581	0.0378758	0.0653128	0.302231	87	454.818	3210.71	53.0103	0.0861683	0.0856683	0.594571	0.0382142	0.0636787	0.303536
88	533.473	7569.08	6.62854	0.0871682	0.0866682	0.598883	0.0384722	0.0586688	0.303976	88	454.818	3210.71	53.0103	0.0871682	0.0866682	0.59694	0.0386605	0.0598533	0.304546
89	535.637	7707.68	7.06138	0.0881682	0.0876682	0.602962	0.0390664	0.0524046	0.305567	89	454.818	3210.71	53.0103	0.0881682	0.0876682	0.599044	0.039122	0.0561508	0.305683
90	537.675	7838.21	7.46898	0.0891682	0.0886682	0.606791	0.0396565	0.0465332	0.307019	90	454.818	3210.71	53.0103	0.0891682	0.0886682	0.600937	0.0396011	0.0525794	0.306882
91	539.593	7961.03	7.85254	0.0901682	0.0896682	0.610349	0.0402412	0.0410643	0.308346	91	454.818	3210.71	53.0103	0.0901682	0.0896682	0.602671	0.0400963	0.0491453	0.308087
92	541.396	8076.52	8.2132	0.0911682	0.0906682	0.613617	0.0408193	0.0360044	0.309559	92	454.818	3210.71	53.0103	0.0911682	0.0906682	0.604287	0.0406038	0.0458529	0.309256
93	543.091	8185.07	8.55217	0.0921682	0.0916682	0.616584	0.0413906	0.0313557	0.31067	93	454.818	3210.71	53.0103	0.0921682	0.0916682	0.605813	0.04112	0.0427039	0.310363
94	544.684	8287.09	8.87076	0.0931682	0.0926682	0.619242	0.0419549	0.0271159	0.311687	94	454.818	3210.71	53.0103	0.0931682	0.0926682	0.607262	0.0416419	0.0396983	0.311397
95	546.182	8383.02	9.17033	0.0941682	0.0936682	0.621588	0.0425128	0.0232789	0.31262	95	454.818	3210.71	53.0103	0.0941682	0.0936682	0.608642	0.0421678	0.0368345	0.312356
96	547.592	8473.34	9.4524	0.0951682	0.0946682	0.623623	0.0430651	0.0198343	0.313477	96	454.818	3210.71	53.0103	0.0951682	0.0946682	0.609953	0.0426968	0.0341099	0.31324
97	548.923	8558.58	9.71858	0.0961682	0.0956682	0.625352	0.0436132	0.0167673	0.314267	97	454.818	3210.71	53.0103	0.0961682	0.0956682	0.611194	0.0432283	0.0315206	0.314057
98	550.183	8639.29	9.97062	0.0971683	0.0966682	0.626784	0.0441591	0.0140595	0.314997	98	454.818	3210.71	53.0103	0.0971683	0.0966682	0.612367	0.0437607	0.0290622	0.31481
99	551.382	8716.07	10.2104	0.0981683	0.0976683	0.62793	0.0447052	0.0116888	0.315676	99	454.818	3210.71	53.0103	0.0981683	0.0976683	0.613476	0.0442907	0.0267297	0.315503
100	552.529	8789.48	10.4396	0.0991683	0.0986683	0.628803	0.0452537	0.00963409	0.316309	100	454.818	3210.71	53.0103	0.0991683	0.0986683	0.614532	0.0448121	0.0245179	0.316138
101	553.632	8860.16	10.6604	0.100168	0.0996683	0.629419	0.045808	0.00786846	0.316904	101	454.818	3210.71	53.0103	0.100168	0.0996683	0.61555	0.0453154	0.0224211	0.316713
102	554.703	8928.75	10.8746	0.101168	0.100668	0.629795	0.0463712	0.00636552	0.317469	102	454.818	3210.71	53.0103	0.101168	0.100668	0.616554	0.045788	0.0204334	0.317224
103	555.751	8995.88	11.0842	0.102168	0.101668	0.629947	0.0469469	0.00509827	0.318008	103	454.818	3210.71	53.0103	0.102168	0.101668	0.617568	0.0462171	0.0185486	0.317667
104	556.786	9062.16	11.2912	0.103168	0.102668	0.629893	0.047539	0.0040402	0.318528	104	454.818	3210.71	53.0103	0.103168	0.102668	0.618608	0.0465932	0.0167601	0.318038
105	557.079	9080.92	11.3498	0.103207	0.103187	0.629871	0.0477085	0.00374669	0.318674	105	454.818	3210.71	53.0103	0.103207	0.103187	0.619161	0.046767	0.0158668	0.318205
106	557.18	9087.37	11.3699	0.104207	0.103707	0.630287	0.0477335	0.00324584	0.318733	106	454.818	3210.71	53.0103	0.104207	0.103707	0.619722	0.046927	0.0149966	0.318354
107	557.304	9095.34	11.3948	0.105207	0.104707	0.630803	0.0477644	0.00262619	0.318807	107	454.818	3210.71	53.0103	0.105207	0.104707	0.620815	0.0472016	0.0133835	0.3186
108	557.415	9102.43	11.4169	0.106207	0.105707	0.631262	0.0477919	0.00207437	0.318872	108	454.818	3210.71	53.0103	0.106207	0.105707	0.621893	0.0474539	0.0118456	0.318808
109	557.511	9108.61	11.4362	0.107207	0.106707	0.631661	0.047816	0.00159401	0.318929	109	454.818	3210.71	53.0103	0.107207	0.106707	0.622907	0.0477144	0.0103762	0.319002
110	557.594	9113.86	11.4526	0.108208	0.107708	0.632002	0.0478365	0.00118496	0.318977	110	454.818	3210.71	53.0103	0.108208	0.107708	0.623807	0.0480169	0.00896817	0.319208
111	557.662	9118.22	11.4662	0.109209	0.108708	0.632284	0.0478535	0.000845858	0.319017	111	454.818	3210.71	53.0103	0.109209	0.108708	0.624551	0.0483912	0.00761466	0.319444
112	557.693	9120.22	11.4725	0.109516	0.109362	0.632413	0.0478613	0.000689992	0.319035	112	454.818	3210.71	53.0103	0.109516	0.109362	0.624938	0.0486848	0.00675668	0.319621
113	558.61	9178.98	11.656	0.110516	0.110016	0.631597	0.0484762	0.000465351	0.319461	113	454.818	3210.71	53.0103	0.110516	0.110016	0.625246	0.0490188	0.00591885	0.319816
114	559.761	9252.7	11.8862	0.111516	0.111016	0.630506	0.0492625	0.000245582	0.319986	114	454.818	3210.71	53.0103	0.111516	0.111016	0.625571	0.0496071	0.0046716	0.32015
115	560.962	9328.12	12.1263	0.112516	0.112016	0.629331	0.0501106	8.71886e-05	0.320471	115	454.818	3210.71	53.0103	0.112516	0.112016	0.625746	0.0502752	0.00346127	0.320518
116	562.213	9406.23	12.3765	0.113516	0.113016	0.628023	0.0510182	1.17838e-05	0.320947	116	454.818	3210.71	53.0103	0.113516	0.113016	0.625811	0.0510014	0.00228304	0.320905
117	563.201	9467.91	12.5741	0.114516	0.114016	0.626928	0.0517487	7.85879e-06	0.321315	117	454.818	3210.71	53.0103	0.114516	0.114016	0.625806	0.0517605	0.00113244	0.321301
118	564.244	9533.03	12.7827	0.115516	0.115016	0.625769	0.0525288	5.17172e-06	0.321697	118	454.818	3210.71	53.0103	0.115516	0.115016	0.625769	0.0525288	5.17172e-06	0.321697

## Sheet: B-5_4
Path B-5_4: Primary										Path B-5_4: Diffused
shell	temperature (｡C)	pressure (bar)		radius (cm)	X(node) (cm)	Xfe	Xmg	Xmn	Xca	shell	temperature (｡C)	pressure (bar)	tot.time (my)	radius (cm)	X(node) (cm)	Xfe	Xmg	Xmn	Xca
1	501.741	5922.46	tot.time (my)	0.000998584	0.000499292	0.467945	0.0246806	0.193944	0.31343	1	454.818	3210.71	53.0103	0.000998584	0.000499292	0.481758	0.0251696	0.179526	0.313546
2	501.883	5929	0.282218	0.00199864	0.00149861	0.468534	0.0247314	0.193281	0.313453	2	454.818	3210.71	53.0103	0.00199864	0.00149861	0.481823	0.0251758	0.179453	0.313548
3	502.036	5936.12	0.310434	0.00299878	0.00249871	0.469176	0.0247868	0.192559	0.313478	3	454.818	3210.71	53.0103	0.00299878	0.00249871	0.482106	0.0252026	0.179134	0.313558
4	502.203	5943.86	0.341112	0.00399872	0.00349875	0.469875	0.0248472	0.191773	0.313505	4	454.818	3210.71	53.0103	0.00399872	0.00349875	0.482543	0.0252433	0.178643	0.313571
5	502.385	5952.3	0.374507	0.00499886	0.00449879	0.470637	0.0249133	0.190916	0.313534	5	454.818	3210.71	53.0103	0.00499886	0.00449879	0.483124	0.0252961	0.177996	0.313584
6	502.583	5961.51	0.410912	0.0059989	0.00549888	0.471469	0.0249854	0.189981	0.313565	6	454.818	3210.71	53.0103	0.0059989	0.00549888	0.483851	0.0253605	0.177195	0.313594
7	502.799	5971.53	0.45058	0.00699896	0.00649893	0.472376	0.0250642	0.188962	0.313598	7	454.818	3210.71	53.0103	0.00699896	0.00649893	0.484725	0.0254363	0.176243	0.313595
8	503.034	5982.43	0.493785	0.00799906	0.00749901	0.473363	0.0251503	0.187853	0.313634	8	454.818	3210.71	53.0103	0.00799906	0.00749901	0.485753	0.0255239	0.175141	0.313582
9	503.289	5994.26	0.540779	0.008999	0.00849903	0.474437	0.025244	0.186648	0.313672	9	454.818	3210.71	53.0103	0.008999	0.00849903	0.486942	0.0256243	0.173889	0.313545
10	503.566	6007.09	0.591805	0.00999898	0.00949899	0.475602	0.0253461	0.18534	0.313712	10	454.818	3210.71	53.0103	0.00999898	0.00949899	0.488299	0.0257386	0.172485	0.313477
11	503.865	6020.95	0.647104	0.0109989	0.0104989	0.476863	0.0254569	0.183925	0.313755	11	454.818	3210.71	53.0103	0.0109989	0.0104989	0.489829	0.0258679	0.17093	0.313373
12	504.011	6027.75	0.706898	0.011291	0.0111449	0.477482	0.0255113	0.183229	0.313778	12	454.818	3210.71	53.0103	0.011291	0.0111449	0.490912	0.02596	0.169844	0.313284
13	504.324	6042.26	0.736193	0.0122907	0.0117908	0.478807	0.0256359	0.181973	0.313584	13	454.818	3210.71	53.0103	0.0122907	0.0117908	0.492067	0.0260584	0.168697	0.313178
14	504.728	6060.99	0.798776	0.0132907	0.0127907	0.48052	0.0257974	0.180348	0.313334	14	454.818	3210.71	53.0103	0.0132907	0.0127907	0.494003	0.0262244	0.166793	0.31298
15	505.161	6081.06	0.879497	0.0142907	0.0137907	0.482361	0.0259717	0.178601	0.313066	15	454.818	3210.71	53.0103	0.0142907	0.0137907	0.49612	0.026407	0.164729	0.312744
16	505.623	6102.53	0.966048	0.0152901	0.0147904	0.484334	0.0261592	0.176727	0.31278	16	454.818	3210.71	53.0103	0.0152901	0.0147904	0.498415	0.026606	0.162504	0.312475
17	506.118	6125.48	1.0586	0.01629	0.0157901	0.486449	0.0263612	0.174715	0.312475	17	454.818	3210.71	53.0103	0.01629	0.0157901	0.500886	0.0268217	0.160117	0.312176
18	506.647	6150.01	1.15756	0.0172901	0.0167901	0.488715	0.0265787	0.172557	0.312148	18	454.818	3210.71	53.0103	0.0172901	0.0167901	0.503531	0.0270545	0.157564	0.31185
19	507.212	6176.22	1.26335	0.0182904	0.0177902	0.491143	0.0268129	0.170243	0.3118	19	454.818	3210.71	53.0103	0.0182904	0.0177902	0.50635	0.0273049	0.154846	0.311499
20	507.815	6204.17	1.37632	0.0192904	0.0187904	0.49374	0.0270649	0.167766	0.311429	20	454.818	3210.71	53.0103	0.0192904	0.0187904	0.509338	0.0275735	0.151964	0.311124
21	508.456	6233.93	1.49684	0.0202904	0.0197904	0.496514	0.0273356	0.165116	0.311035	21	454.818	3210.71	53.0103	0.0202904	0.0197904	0.512493	0.027861	0.148921	0.310726
22	509.138	6265.56	1.62515	0.0212904	0.0207904	0.499471	0.0276262	0.162287	0.310616	22	454.818	3210.71	53.0103	0.0212904	0.0207904	0.515811	0.0281682	0.145718	0.310303
23	509.861	6299.1	1.76152	0.0222904	0.0217904	0.502617	0.0279375	0.159273	0.310172	23	454.818	3210.71	53.0103	0.0222904	0.0217904	0.519287	0.0284957	0.14236	0.309857
24	510.626	6334.58	1.90613	0.0232904	0.0227904	0.505957	0.0282706	0.156068	0.309704	24	454.818	3210.71	53.0103	0.0232904	0.0227904	0.522915	0.028844	0.138854	0.309387
25	511.433	6372.01	2.05912	0.0242901	0.0237903	0.509493	0.028626	0.152671	0.30921	25	454.818	3210.71	53.0103	0.0242901	0.0237903	0.526687	0.0292138	0.135206	0.308892
26	512.282	6411.4	2.2205	0.0252902	0.0247902	0.513228	0.0290047	0.149077	0.308691	26	454.818	3210.71	53.0103	0.0252902	0.0247902	0.530594	0.0296052	0.131426	0.308374
27	513.173	6452.73	2.39031	0.0262902	0.0257902	0.517159	0.0294073	0.145286	0.308147	27	454.818	3210.71	53.0103	0.0262902	0.0257902	0.534625	0.0300188	0.127524	0.307833
28	514.105	6495.94	2.5685	0.0272903	0.0267902	0.521287	0.0298341	0.141299	0.30758	28	454.818	3210.71	53.0103	0.0272903	0.0267902	0.538765	0.0304545	0.123511	0.307269
29	515.076	6541.01	2.75484	0.0282902	0.0277903	0.525605	0.0302856	0.13712	0.306989	29	454.818	3210.71	53.0103	0.0282902	0.0277903	0.543	0.0309122	0.119402	0.306686
30	516.085	6587.83	2.94912	0.0292902	0.0287902	0.530109	0.0307619	0.132754	0.306375	30	454.818	3210.71	53.0103	0.0292902	0.0287902	0.547314	0.0313917	0.11521	0.306084
31	517.131	6636.32	3.151	0.03029	0.0297901	0.534789	0.0312631	0.128207	0.305741	31	454.818	3210.71	53.0103	0.03029	0.0297901	0.551685	0.0318921	0.110952	0.305471
32	518.211	6686.42	3.36007	0.03129	0.03079	0.539639	0.0317895	0.123485	0.305087	32	454.818	3210.71	53.0103	0.03129	0.03079	0.556093	0.0324122	0.106644	0.304851
33	519.323	6738.03	3.57606	0.0322899	0.0317899	0.544651	0.0323412	0.118595	0.304414	33	454.818	3210.71	53.0103	0.0322899	0.0317899	0.560513	0.0329495	0.102301	0.304237
34	520.466	6791.05	3.79859	0.0332899	0.0327899	0.549812	0.0329182	0.113547	0.303723	34	454.818	3210.71	53.0103	0.0332899	0.0327899	0.564917	0.0335004	0.0979412	0.303641
35	521.637	6845.34	4.02718	0.0342899	0.0337899	0.555109	0.0335201	0.108354	0.303017	35	454.818	3210.71	53.0103	0.0342899	0.0337899	0.569277	0.0340599	0.0935815	0.303082
36	522.831	6900.73	4.26126	0.0352899	0.0347899	0.560522	0.0341463	0.103034	0.302297	36	454.818	3210.71	53.0103	0.0352899	0.0347899	0.573561	0.0346215	0.0892386	0.302578
37	524.01	6963.02	4.5001	0.03629	0.0357899	0.5659	0.0347692	0.0975964	0.301735	37	454.818	3210.71	53.0103	0.03629	0.0357899	0.57774	0.0351773	0.0849286	0.302154
38	525.146	7035.8	4.73595	0.03729	0.03679	0.57113	0.0353692	0.0920622	0.301439	38	454.818	3210.71	53.0103	0.03729	0.03679	0.581778	0.0357191	0.080667	0.301836
39	526.291	7109.1	4.96321	0.03829	0.03779	0.576399	0.0359865	0.0864771	0.301138	39	454.818	3210.71	53.0103	0.03829	0.03779	0.585637	0.0362394	0.076468	0.301656
40	527.439	7182.64	5.19214	0.03929	0.03879	0.581678	0.0366196	0.0808698	0.300833	40	454.818	3210.71	53.0103	0.03929	0.03879	0.589273	0.0367334	0.0723443	0.30165
41	528.586	7256.1	5.42179	0.04029	0.03979	0.586936	0.0372665	0.0752714	0.300526	41	454.818	3210.71	53.0103	0.04029	0.03979	0.59264	0.0372009	0.0683072	0.301852
42	528.941	7278.82	5.65117	0.0403664	0.0403282	0.588564	0.0374693	0.0735362	0.300431	42	454.818	3210.71	53.0103	0.0403664	0.0403282	0.594324	0.0374439	0.0661744	0.302058
43	528.944	7279.03	5.72212	0.0413586	0.0408625	0.589482	0.0374016	0.0726628	0.300453	43	454.818	3210.71	53.0103	0.0413586	0.0408625	0.595902	0.0376804	0.0640868	0.302331
44	528.948	7279.25	5.72278	0.0420642	0.0417114	0.590458	0.0373297	0.0717357	0.300477	44	454.818	3210.71	53.0103	0.0420642	0.0417114	0.598215	0.03805	0.0608326	0.302903
45	531.176	7421.98	5.72346	0.0430642	0.0425642	0.594581	0.0378758	0.0653128	0.302231	45	454.818	3210.71	53.0103	0.0430642	0.0425642	0.600297	0.038421	0.0576473	0.303635
46	533.473	7569.07	6.16921	0.0440642	0.0435642	0.598883	0.0384722	0.0586688	0.303976	46	454.818	3210.71	53.0103	0.0440642	0.0435642	0.602451	0.038864	0.0540257	0.304659
47	535.637	7707.68	6.62854	0.0450641	0.0445641	0.602962	0.0390664	0.0524046	0.305567	47	454.818	3210.71	53.0103	0.0450641	0.0445641	0.604341	0.0393222	0.0505345	0.305803
48	537.675	7838.2	7.06138	0.0460641	0.0455641	0.606791	0.0396565	0.0465332	0.307019	48	454.818	3210.71	53.0103	0.0460641	0.0455641	0.60602	0.0397977	0.0471803	0.307002
49	539.593	7961.03	7.46898	0.0470641	0.0465641	0.610349	0.0402412	0.0410643	0.308346	49	454.818	3210.71	53.0103	0.0470641	0.0465641	0.607542	0.0402886	0.0439676	0.308202
50	541.396	8076.52	7.85254	0.0480641	0.0475641	0.613617	0.0408193	0.0360044	0.309559	50	454.818	3210.71	53.0103	0.0480641	0.0475641	0.608947	0.0407913	0.040899	0.309363
51	543.091	8185.07	8.2132	0.0490641	0.0485641	0.616584	0.0413906	0.0313557	0.31067	51	454.818	3210.71	53.0103	0.0490641	0.0485641	0.610262	0.041302	0.0379751	0.310461
52	544.684	8287.08	8.55217	0.0500642	0.0495641	0.619242	0.0419549	0.0271159	0.311687	52	454.818	3210.71	53.0103	0.0500642	0.0495641	0.611502	0.0418181	0.0351944	0.311485
53	546.182	8383.01	8.87076	0.0510642	0.0505642	0.621588	0.0425128	0.0232789	0.31262	53	454.818	3210.71	53.0103	0.0510642	0.0505642	0.612673	0.042338	0.0325546	0.312434
54	547.592	8473.34	9.17033	0.0520642	0.0515642	0.623623	0.0430651	0.0198343	0.313477	54	454.818	3210.71	53.0103	0.0520642	0.0515642	0.613776	0.0428609	0.0300521	0.313311
55	548.923	8558.58	9.4524	0.0530641	0.0525641	0.625352	0.0436132	0.0167673	0.314267	55	454.818	3210.71	53.0103	0.0530641	0.0525641	0.614812	0.0433861	0.0276825	0.31412
56	550.183	8639.29	9.71858	0.0540642	0.0535642	0.626784	0.0441591	0.0140595	0.314997	56	454.818	3210.71	53.0103	0.0540642	0.0535642	0.615781	0.043912	0.0254409	0.314866
57	551.382	8716.07	9.97062	0.0550642	0.0545642	0.62793	0.0447052	0.0116888	0.315676	57	454.818	3210.71	53.0103	0.0550642	0.0545642	0.616689	0.0444352	0.0233218	0.315553
58	552.529	8789.48	10.2104	0.0560642	0.0555642	0.628803	0.0452537	0.00963409	0.316309	58	454.818	3210.71	53.0103	0.0560642	0.0555642	0.617548	0.0449493	0.0213199	0.316183
59	553.632	8860.16	10.4396	0.0570642	0.0565642	0.629419	0.045808	0.00786846	0.316904	59	454.818	3210.71	53.0103	0.0570642	0.0565642	0.618374	0.0454444	0.0194293	0.316752
60	554.703	8928.75	10.6604	0.0580642	0.0575642	0.629795	0.0463712	0.00636552	0.317469	60	454.818	3210.71	53.0103	0.0580642	0.0575642	0.619191	0.045908	0.0176442	0.317257
61	555.751	8995.88	10.8746	0.0590641	0.0585641	0.629947	0.0469469	0.00509827	0.318008	61	454.818	3210.71	53.0103	0.0590641	0.0585641	0.62002	0.0463275	0.0159585	0.317694
62	556.786	9062.16	11.0842	0.0600641	0.0595641	0.629893	0.047539	0.0040402	0.318528	62	454.818	3210.71	53.0103	0.0600641	0.0595641	0.62088	0.0466936	0.014366	0.318061
63	557.079	9080.92	11.2912	0.0601026	0.0600834	0.629871	0.0477085	0.00374669	0.318674	63	454.818	3210.71	53.0103	0.0601026	0.0600834	0.62134	0.0468623	0.0135733	0.318225
64	557.18	9087.37	11.3498	0.0611028	0.0606027	0.630287	0.0477335	0.00324584	0.318733	64	454.818	3210.71	53.0103	0.0611028	0.0606027	0.621808	0.0470174	0.0128031	0.318372
65	557.304	9095.34	11.3699	0.062103	0.0616029	0.630803	0.0477644	0.00262619	0.318807	65	454.818	3210.71	53.0103	0.062103	0.0616029	0.622722	0.0472834	0.0113808	0.318614
66	557.415	9102.43	11.3948	0.0631033	0.0626031	0.631262	0.0477919	0.00207437	0.318872	66	454.818	3210.71	53.0103	0.0631033	0.0626031	0.623619	0.0475286	0.0100321	0.31882
67	557.511	9108.61	11.4169	0.0641032	0.0636033	0.631661	0.047816	0.00159401	0.318929	67	454.818	3210.71	53.0103	0.0641032	0.0636033	0.624451	0.047784	0.00875087	0.319014
68	557.594	9113.86	11.4362	0.0651038	0.0646035	0.632002	0.0478365	0.00118496	0.318977	68	454.818	3210.71	53.0103	0.0651038	0.0646035	0.625166	0.048083	0.00753083	0.31922
69	557.662	9118.22	11.4526	0.0661048	0.0656043	0.632284	0.0478535	0.000845858	0.319017	69	454.818	3210.71	53.0103	0.0661048	0.0656043	0.625722	0.0484549	0.00636591	0.319457
70	557.693	9120.22	11.4662	0.0664119	0.0662584	0.632413	0.0478613	0.000689992	0.319035	70	454.818	3210.71	53.0103	0.0664119	0.0662584	0.625986	0.048747	0.00563189	0.319635
71	558.61	9178.98	11.4725	0.0674119	0.0669119	0.631597	0.0484762	0.000465351	0.319461	71	454.818	3210.71	53.0103	0.0674119	0.0669119	0.62617	0.0490792	0.00491872	0.319832
72	559.761	9252.7	11.656	0.0684119	0.0679119	0.630506	0.0492625	0.000245582	0.319986	72	454.818	3210.71	53.0103	0.0684119	0.0679119	0.626305	0.0496634	0.0038641	0.320167
73	560.962	9328.12	11.8862	0.0694119	0.0689119	0.629331	0.0501106	8.71886e-05	0.320471	73	454.818	3210.71	53.0103	0.0694119	0.0689119	0.626292	0.0503247	0.00284939	0.320534
74	562.213	9406.23	12.1263	0.0704119	0.0699119	0.628023	0.0510182	1.17838e-05	0.320947	74	454.818	3210.71	53.0103	0.0704119	0.0699119	0.626171	0.0510399	0.0018705	0.320918
75	563.201	9467.91	12.3765	0.0714118	0.0709118	0.626928	0.0517487	7.85879e-06	0.321315	75	454.818	3210.71	53.0103	0.0714118	0.0709118	0.625984	0.051783	0.000923641	0.321309
76	564.244	9533.03	12.5741	0.0724117	0.0719118	0.625769	0.0525288	5.17172e-06	0.321697	76	454.818	3210.71	53.0103	0.0724117	0.0719118	0.625769	0.0525288	5.17172e-06	0.321697

## Sheet: B-5_6
Path B-5_6: Primary										Path B-5_6: Diffused
Shell	temperature (｡C)	pressure (bar)	tot.time (my)	radius (cm)	X(node) (cm)	Xfe	Xmg	Xmn	Xca	Shell	temperature (｡C)	pressure (bar)	tot.time (my)	radius (cm)	X(node) (cm)	Xfe	Xmg	Xmn	Xca
1	517.131	6636.32	3.36007	0.000999771	0.000499886	0.534789	0.0312631	0.128207	0.305741	1	454.818	3210.71	53.0103	0.000999771	0.000499886	0.61891	0.0352858	0.0428438	0.30296
2	518.211	6686.42	3.57606	0.00199972	0.00149975	0.539639	0.0317895	0.123485	0.305087	2	454.818	3210.71	53.0103	0.00199972	0.00149975	0.618994	0.0353284	0.0427594	0.302918
3	519.323	6738.03	3.79859	0.00299969	0.00249971	0.544651	0.0323412	0.118595	0.304414	3	454.818	3210.71	53.0103	0.00299969	0.00249971	0.619356	0.0355098	0.0423952	0.302739
4	520.466	6791.05	4.02718	0.00399968	0.00349969	0.549812	0.0329182	0.113547	0.303723	4	454.818	3210.71	53.0103	0.00399968	0.00349969	0.619893	0.0357742	0.0418419	0.302491
5	521.637	6845.34	4.26126	0.00499968	0.00449968	0.555109	0.0335201	0.108354	0.303017	5	454.818	3210.71	53.0103	0.00499968	0.00449968	0.620564	0.0360969	0.0411251	0.302214
6	522.831	6900.73	4.5001	0.00599965	0.00549967	0.560522	0.0341463	0.103034	0.302297	6	454.818	3210.71	53.0103	0.00599965	0.00549967	0.621338	0.0364581	0.0402611	0.301943
7	524.01	6963.02	4.73595	0.00699975	0.0064997	0.5659	0.0347692	0.0975964	0.301735	7	454.818	3210.71	53.0103	0.00699975	0.0064997	0.62218	0.0368407	0.0392645	0.301715
8	525.146	7035.8	4.96321	0.00799976	0.00749975	0.57113	0.0353692	0.0920622	0.301439	8	454.818	3210.71	53.0103	0.00799976	0.00749975	0.623051	0.0372298	0.0381501	0.301569
9	526.291	7109.1	5.19214	0.00899977	0.00849977	0.576399	0.0359865	0.0864771	0.301138	9	454.818	3210.71	53.0103	0.00899977	0.00849977	0.623907	0.0376144	0.0369326	0.301546
10	527.439	7182.64	5.42179	0.00999977	0.00949977	0.581678	0.0366196	0.0808698	0.300833	10	454.818	3210.71	53.0103	0.00999977	0.00949977	0.624699	0.0379885	0.035627	0.301685
11	528.586	7256.1	5.65117	0.0109997	0.0104997	0.586936	0.0372665	0.0752714	0.300526	11	454.818	3210.71	53.0103	0.0109997	0.0104997	0.625378	0.0383518	0.0342482	0.302022
12	528.941	7278.82	5.72212	0.0110761	0.0110379	0.588564	0.0374693	0.0735362	0.300431	12	454.818	3210.71	53.0103	0.0110761	0.0110379	0.62568	0.0385449	0.0334819	0.302293
13	528.944	7279.03	5.72278	0.0120683	0.0115722	0.589482	0.0374016	0.0726628	0.300453	13	454.818	3210.71	53.0103	0.0120683	0.0115722	0.625931	0.0387355	0.0327095	0.302624
14	528.948	7279.25	5.72346	0.012774	0.0124212	0.590458	0.0373297	0.0717357	0.300477	14	454.818	3210.71	53.0103	0.012774	0.0124212	0.626231	0.0390403	0.0314567	0.303272
15	531.176	7421.98	6.16921	0.013774	0.013274	0.594581	0.0378758	0.0653128	0.302231	15	454.818	3210.71	53.0103	0.013774	0.013274	0.626412	0.0393543	0.0301772	0.304057
16	533.473	7569.07	6.62854	0.0147739	0.0142739	0.598883	0.0384722	0.0586688	0.303976	16	454.818	3210.71	53.0103	0.0147739	0.0142739	0.62649	0.0397385	0.0286589	0.305113
17	535.637	7707.68	7.06138	0.0157739	0.0152739	0.602962	0.0390664	0.0524046	0.305567	17	454.818	3210.71	53.0103	0.0157739	0.0152739	0.626465	0.0401435	0.0271343	0.306258
18	537.675	7838.2	7.46898	0.0167739	0.0162739	0.606791	0.0396565	0.0465332	0.307019	18	454.818	3210.71	53.0103	0.0167739	0.0162739	0.626381	0.0405688	0.0256155	0.307434
19	539.593	7961.03	7.85254	0.0177739	0.0172739	0.610349	0.0402412	0.0410643	0.308346	19	454.818	3210.71	53.0103	0.0177739	0.0172739	0.626278	0.0410114	0.0241129	0.308597
20	541.396	8076.52	8.2132	0.0187739	0.0182739	0.613617	0.0408193	0.0360044	0.309559	20	454.818	3210.71	53.0103	0.0187739	0.0182739	0.626183	0.0414674	0.0226352	0.309715
21	543.091	8185.07	8.55217	0.0197739	0.0192739	0.616584	0.0413906	0.0313557	0.31067	21	454.818	3210.71	53.0103	0.0197739	0.0192739	0.626108	0.0419334	0.0211897	0.310769
22	544.684	8287.08	8.87076	0.0207739	0.0202739	0.619242	0.0419549	0.0271159	0.311687	22	454.818	3210.71	53.0103	0.0207739	0.0202739	0.626059	0.0424069	0.0197818	0.311752
23	546.182	8383.01	9.17033	0.0217739	0.0212739	0.621588	0.0425128	0.0232789	0.31262	23	454.818	3210.71	53.0103	0.0217739	0.0212739	0.626032	0.0428866	0.0184161	0.312665
24	547.592	8473.34	9.4524	0.0227739	0.0222739	0.623623	0.0430651	0.0198343	0.313477	24	454.818	3210.71	53.0103	0.0227739	0.0222739	0.626022	0.0433717	0.0170959	0.31351
25	548.923	8558.58	9.71858	0.0237739	0.0232739	0.625352	0.0436132	0.0167673	0.314267	25	454.818	3210.71	53.0103	0.0237739	0.0232739	0.626023	0.0438613	0.0158236	0.314292
26	550.183	8639.29	9.97062	0.024774	0.0242739	0.626784	0.0441591	0.0140595	0.314997	26	454.818	3210.71	53.0103	0.024774	0.0242739	0.62603	0.0443535	0.0146005	0.315016
27	551.382	8716.07	10.2104	0.025774	0.025274	0.62793	0.0447052	0.0116888	0.315676	27	454.818	3210.71	53.0103	0.025774	0.025274	0.626045	0.0448441	0.0134277	0.315683
28	552.529	8789.48	10.4396	0.026774	0.026274	0.628803	0.0452537	0.00963409	0.316309	28	454.818	3210.71	53.0103	0.026774	0.026274	0.626074	0.0453261	0.0123054	0.316294
29	553.632	8860.16	10.6604	0.027774	0.027274	0.629419	0.045808	0.00786846	0.316904	29	454.818	3210.71	53.0103	0.027774	0.027274	0.626131	0.0457892	0.0112336	0.316847
30	554.703	8928.75	10.8746	0.0287739	0.0282739	0.629795	0.0463712	0.00636552	0.317469	30	454.818	3210.71	53.0103	0.0287739	0.0282739	0.626232	0.0462206	0.0102115	0.317336
31	555.751	8995.88	11.0842	0.0297739	0.0292739	0.629947	0.0469469	0.00509827	0.318008	31	454.818	3210.71	53.0103	0.0297739	0.0292739	0.626396	0.0466078	0.00923823	0.317758
32	556.786	9062.16	11.2912	0.0307739	0.0302739	0.629893	0.047539	0.0040402	0.318528	32	454.818	3210.71	53.0103	0.0307739	0.0302739	0.626634	0.0469426	0.00831233	0.318111
33	557.079	9080.92	11.3498	0.0308124	0.0307931	0.629871	0.0477085	0.00374669	0.318674	33	454.818	3210.71	53.0103	0.0308124	0.0307931	0.626785	0.0470959	0.00784956	0.318269
34	557.18	9087.37	11.3699	0.0318126	0.0313125	0.630287	0.0477335	0.00324584	0.318733	34	454.818	3210.71	53.0103	0.0318126	0.0313125	0.626954	0.0472364	0.00739899	0.318411
35	557.304	9095.34	11.3948	0.0328127	0.0323127	0.630803	0.0477644	0.00262619	0.318807	35	454.818	3210.71	53.0103	0.0328127	0.0323127	0.627314	0.047477	0.00656445	0.318644
36	557.415	9102.43	11.4169	0.033813	0.0333129	0.631262	0.0477919	0.00207437	0.318872	36	454.818	3210.71	53.0103	0.033813	0.0333129	0.627682	0.0477015	0.00577129	0.318846
37	557.511	9108.61	11.4362	0.034813	0.034313	0.631661	0.047816	0.00159401	0.318929	37	454.818	3210.71	53.0103	0.034813	0.034313	0.628004	0.0479411	0.00501739	0.319038
38	557.594	9113.86	11.4526	0.0358136	0.0353133	0.632002	0.0478365	0.00118496	0.318977	38	454.818	3210.71	53.0103	0.0358136	0.0353133	0.628226	0.0482285	0.00430039	0.319245
39	557.662	9118.22	11.4662	0.0368146	0.0363141	0.632284	0.0478535	0.000845858	0.319017	39	454.818	3210.71	53.0103	0.0368146	0.0363141	0.628305	0.0485916	0.00361791	0.319485
40	557.693	9120.22	11.4725	0.0371217	0.0369682	0.632413	0.0478613	0.000689992	0.319035	40	454.818	3210.71	53.0103	0.0371217	0.0369682	0.628267	0.0488782	0.00318968	0.319665
41	558.61	9178.98	11.656	0.0381217	0.0376217	0.631597	0.0484762	0.000465351	0.319461	41	454.818	3210.71	53.0103	0.0381217	0.0376217	0.628157	0.0492044	0.00277546	0.319863
42	559.761	9252.7	11.8862	0.0391217	0.0386217	0.630506	0.0492625	0.000245582	0.319986	42	454.818	3210.71	53.0103	0.0391217	0.0386217	0.627857	0.0497774	0.00216689	0.320199
43	560.962	9328.12	12.1263	0.0401216	0.0396217	0.629331	0.0501106	8.71886e-05	0.320471	43	454.818	3210.71	53.0103	0.0401216	0.0396217	0.627426	0.0504225	0.00158716	0.320564
44	562.213	9406.23	12.3765	0.0411217	0.0406217	0.628023	0.0510182	1.17838e-05	0.320947	44	454.818	3210.71	53.0103	0.0411217	0.0406217	0.626907	0.0511145	0.00103463	0.320943
45	563.201	9467.91	12.5741	0.0421215	0.0416216	0.626928	0.0517487	7.85879e-06	0.321315	45	454.818	3210.71	53.0103	0.0421215	0.0416216	0.626342	0.0518255	0.000507804	0.321325
46	564.244	9533.03	12.7827	0.0431215	0.0426215	0.625769	0.0525288	5.17172e-06	0.321697	46	454.818	3210.71	53.0103	0.0431215	0.0426215	0.625769	0.0525288	5.17172e-06	0.321697

## Sheet: B-5_8
Path B-5_8: Primary										Path B-5_8: Diffused
Shell	temperature (｡C)	pressure (bar)	tot.time (my)	radius (cm)	X(node) (cm)	Xfe	Xmg	Xmn	Xca	Shell	temperature (｡C)	pressure (bar)	tot.time (my)	radius (cm)	X(node) (cm)	Xmn	Xfe	Xmg	Xca
1	556.786	9062.16	11.2912	0.000999989	0.000499994	0.629893	0.047539	0.0040402	0.318528	1	454.818	3210.71	53.0103	0.000999989	0.000499994	5.44915e-06	0.633	0.0480062	0.318989
2	557.079	9080.92	11.3498	0.00103853	0.00101926	0.629871	0.0477085	0.00374669	0.318674	2	454.818	3210.71	53.0103	0.00103853	0.00101926	5.44675e-06	0.632971	0.0480217	0.319001
3	557.18	9087.37	11.3699	0.0020387	0.00153861	0.630287	0.0477335	0.00324584	0.318733	3	454.818	3210.71	53.0103	0.0020387	0.00153861	5.44339e-06	0.63293	0.0480444	0.31902
4	557.304	9095.34	11.3948	0.00303883	0.00253877	0.630803	0.0477644	0.00262619	0.318807	4	454.818	3210.71	53.0103	0.00303883	0.00253877	5.4322e-06	0.632786	0.0481251	0.319084
5	557.415	9102.43	11.4169	0.00403915	0.00353899	0.631262	0.0477919	0.00207437	0.318872	5	454.818	3210.71	53.0103	0.00403915	0.00353899	5.41625e-06	0.632551	0.0482593	0.319184
6	557.511	9108.61	11.4362	0.00503913	0.00453914	0.631661	0.047816	0.00159401	0.318929	6	454.818	3210.71	53.0103	0.00503913	0.00453914	5.39619e-06	0.632208	0.0484605	0.319326
7	557.594	9113.86	11.4526	0.0060397	0.00553941	0.632002	0.0478365	0.00118496	0.318977	7	454.818	3210.71	53.0103	0.0060397	0.00553941	5.37263e-06	0.631739	0.0487415	0.319514
8	557.662	9118.22	11.4662	0.00704071	0.0065402	0.632284	0.0478535	0.000845858	0.319017	8	454.818	3210.71	53.0103	0.00704071	0.0065402	5.34623e-06	0.631134	0.0491102	0.31975
9	557.693	9120.22	11.4725	0.00734781	0.00719426	0.632413	0.0478613	0.000689992	0.319035	9	454.818	3210.71	53.0103	0.00734781	0.00719426	5.3279e-06	0.63067	0.0493972	0.319928
10	558.61	9178.98	11.656	0.0083478	0.0078478	0.631597	0.0484762	0.000465351	0.319461	10	454.818	3210.71	53.0103	0.0083478	0.0078478	5.3091e-06	0.63016	0.0497151	0.32012
11	559.761	9252.7	11.8862	0.00934777	0.00884778	0.630506	0.0492625	0.000245582	0.319986	11	454.818	3210.71	53.0103	0.00934777	0.00884778	5.27961e-06	0.629299	0.0502566	0.320439
12	560.962	9328.12	12.1263	0.0103478	0.00984777	0.629331	0.0501106	8.71886e-05	0.320471	12	454.818	3210.71	53.0103	0.0103478	0.00984777	5.25022e-06	0.628384	0.0508394	0.320771
13	562.213	9406.23	12.3765	0.0113478	0.0108478	0.628023	0.0510182	1.17838e-05	0.320947	13	454.818	3210.71	53.0103	0.0113478	0.0108478	5.22187e-06	0.62746	0.0514327	0.321102
14	563.201	9467.91	12.5741	0.0123477	0.0118477	0.626928	0.0517487	7.85879e-06	0.321315	14	454.818	3210.71	53.0103	0.0123477	0.0118477	5.19545e-06	0.626575	0.0520054	0.321414
15	564.244	9533.03	12.7827	0.0133476	0.0128476	0.625769	0.0525288	5.17172e-06	0.321697	15	454.818	3210.71	53.0103	0.0133476	0.0128476	5.17172e-06	0.625769	0.0525288	0.321697

## Sheet: B-50_1
Path B-50_1: Primary										Path B-50_1: Diffused
Shell	temperature (｡C	) pressure (bar)	tot.time (my)	radius (cm)	X(node) (cm)	Xfe	Xmg	Xmn	Xca	Shell	temperature (｡C	) pressure (bar)	tot.time (my)	radius (cm)	X(node) (cm)	Xfe	Xmg	Xmn	Xca
1	500.33	5857	0	0.00216214	0.00108107	0.462074	0.0241782	0.200559	0.313189	1	454.818	3210.71	5.30103	0.00216214	0.00108107	0.462078	0.0241783	0.200555	0.313189
2	500.33	5857	1.57893e-06	0.00301928	0.00259071	0.462075	0.0241782	0.200559	0.313189	2	454.818	3210.71	5.30103	0.00301928	0.00259071	0.46208	0.0241784	0.200553	0.313189
3	500.331	5857.02	8.42097e-06	0.00407605	0.00354767	0.462076	0.0241784	0.200557	0.313189	3	454.818	3210.71	5.30103	0.00407605	0.00354767	0.462082	0.0241785	0.200551	0.313189
4	500.331	5857.04	1.84209e-05	0.00504448	0.00456026	0.462078	0.0241786	0.200555	0.313189	4	454.818	3210.71	5.30103	0.00504448	0.00456026	0.462085	0.0241788	0.200547	0.313189
5	500.332	5857.08	3.36839e-05	0.00606704	0.00555576	0.462081	0.0241788	0.200551	0.313189	5	454.818	3210.71	5.30103	0.00606704	0.00555576	0.462089	0.0241791	0.200543	0.313189
6	500.333	5857.13	5.52626e-05	0.00706345	0.00656525	0.462085	0.0241792	0.200546	0.313189	6	454.818	3210.71	5.30103	0.00706345	0.00656525	0.462095	0.0241795	0.200536	0.313189
7	500.335	5857.19	8.42097e-05	0.00808709	0.00757527	0.462092	0.0241797	0.200539	0.313189	7	454.818	3210.71	5.30103	0.00808709	0.00757527	0.462102	0.02418	0.200528	0.313189
8	500.336	5857.28	0.000121578	0.00908224	0.00858466	0.462099	0.0241804	0.200531	0.31319	8	454.818	3210.71	5.30103	0.00908224	0.00858466	0.462111	0.0241807	0.200518	0.31319
9	500.339	5857.39	0.000168419	0.0100923	0.00958728	0.462109	0.0241812	0.20052	0.31319	9	454.818	3210.71	5.30103	0.0100923	0.00958728	0.462122	0.0241816	0.200506	0.31319
10	500.342	5857.52	0.000225787	0.0110925	0.0105924	0.462121	0.0241822	0.200506	0.313191	10	454.818	3210.71	5.30103	0.0110925	0.0105924	0.462136	0.0241827	0.200491	0.313191
11	500.345	5857.68	0.000294734	0.0120953	0.0115939	0.462135	0.0241834	0.20049	0.313191	11	454.818	3210.71	5.30103	0.0120953	0.0115939	0.462151	0.0241839	0.200473	0.313191
12	500.349	5857.87	0.000376312	0.0130986	0.0125969	0.462152	0.0241849	0.200471	0.313192	12	454.818	3210.71	5.30103	0.0130986	0.0125969	0.46217	0.0241854	0.200453	0.313192
13	500.354	5858.09	0.000471574	0.0141014	0.0136	0.462172	0.0241865	0.200449	0.313193	13	454.818	3210.71	5.30103	0.0141014	0.0136	0.462192	0.0241871	0.200428	0.313193
14	500.359	5858.35	0.000581573	0.0150969	0.0145991	0.462195	0.0241885	0.200423	0.313194	14	454.818	3210.71	5.30103	0.0150969	0.0145991	0.462217	0.0241891	0.2004	0.313194
15	500.366	5858.65	0.000709467	0.0161044	0.0156007	0.462221	0.0241907	0.200393	0.313195	15	454.818	3210.71	5.30103	0.0161044	0.0156007	0.462246	0.0241915	0.200368	0.313195
16	500.373	5858.99	0.000858413	0.0171038	0.0166041	0.462252	0.0241934	0.200359	0.313196	16	454.818	3210.71	5.30103	0.0171038	0.0166041	0.46228	0.0241942	0.20033	0.313196
17	500.382	5859.39	0.00103052	0.0181041	0.017604	0.462288	0.0241964	0.200318	0.313198	17	454.818	3210.71	5.30103	0.0181041	0.017604	0.462318	0.0241973	0.200286	0.313198
18	500.392	5859.85	0.00122999	0.0191077	0.0186059	0.462329	0.0241999	0.200272	0.313199	18	454.818	3210.71	5.30103	0.0191077	0.0186059	0.462363	0.0242009	0.200236	0.3132
19	500.403	5860.39	0.00145999	0.0201075	0.0196076	0.462377	0.024204	0.200218	0.313202	19	454.818	3210.71	5.30103	0.0201075	0.0196076	0.462414	0.0242051	0.200179	0.313202
20	500.417	5860.99	0.00172261	0.0211055	0.0206065	0.462431	0.0242086	0.200156	0.313204	20	454.818	3210.71	5.30103	0.0211055	0.0206065	0.462472	0.0242098	0.200114	0.313204
21	500.431	5861.69	0.00202103	0.0221043	0.0216049	0.462493	0.0242139	0.200087	0.313206	21	454.818	3210.71	5.30103	0.0221043	0.0216049	0.462537	0.0242152	0.200041	0.313207
22	500.448	5862.47	0.0023605	0.0231055	0.0226049	0.462563	0.0242198	0.200007	0.313209	22	454.818	3210.71	5.30103	0.0231055	0.0226049	0.462611	0.0242213	0.199958	0.31321
23	500.467	5863.36	0.00274208	0.0241042	0.0236048	0.462643	0.0242266	0.199918	0.313213	23	454.818	3210.71	5.30103	0.0241042	0.0236048	0.462694	0.0242281	0.199865	0.313213
24	500.489	5864.35	0.00316997	0.0251042	0.0246042	0.462731	0.0242341	0.199818	0.313217	24	454.818	3210.71	5.30103	0.0251042	0.0246042	0.462786	0.0242358	0.199761	0.313217
25	500.513	5865.46	0.00364733	0.0261057	0.025605	0.46283	0.0242426	0.199706	0.313221	25	454.818	3210.71	5.30103	0.0261057	0.025605	0.462889	0.0242443	0.199645	0.313221
26	500.539	5866.69	0.00417733	0.0271062	0.0266059	0.46294	0.0242519	0.199582	0.313226	26	454.818	3210.71	5.30103	0.0271062	0.0266059	0.463003	0.0242538	0.199517	0.313226
27	500.568	5868.04	0.00476206	0.0281062	0.0276062	0.463062	0.0242622	0.199445	0.313231	27	454.818	3210.71	5.30103	0.0281062	0.0276062	0.46313	0.0242643	0.199375	0.313231
28	500.601	5869.54	0.00540574	0.029105	0.0286056	0.463195	0.0242736	0.199295	0.313236	28	454.818	3210.71	5.30103	0.029105	0.0286056	0.46327	0.0242759	0.199218	0.313237
29	500.636	5871.19	0.00611678	0.0301054	0.0296052	0.463343	0.0242862	0.199129	0.313243	29	454.818	3210.71	5.30103	0.0301054	0.0296052	0.463425	0.0242887	0.199044	0.313243
30	500.676	5873.01	0.00690362	0.0311056	0.0306055	0.463506	0.0243002	0.198944	0.313249	30	454.818	3210.71	5.30103	0.0311056	0.0306055	0.463596	0.0243029	0.198851	0.31325
31	500.719	5875.03	0.00777466	0.0321045	0.031605	0.463687	0.0243156	0.198741	0.313257	31	454.818	3210.71	5.30103	0.0321045	0.031605	0.463785	0.0243186	0.198638	0.313258
32	500.767	5877.27	0.00873939	0.0331024	0.0326034	0.463887	0.0243327	0.198515	0.313265	32	454.818	3210.71	5.30103	0.0331024	0.0326034	0.463994	0.0243359	0.198404	0.313266
33	500.821	5879.75	0.00980938	0.0341028	0.0336026	0.46411	0.0243517	0.198264	0.313275	33	454.818	3210.71	5.30103	0.0341028	0.0336026	0.464226	0.0243552	0.198144	0.313275
34	500.88	5882.5	0.010993	0.0351032	0.034603	0.464356	0.0243727	0.197987	0.313285	34	454.818	3210.71	5.30103	0.0351032	0.034603	0.464481	0.0243765	0.197857	0.313286
35	500.945	5885.53	0.0122988	0.0361032	0.0356032	0.464627	0.0243959	0.197681	0.313296	35	454.818	3210.71	5.30103	0.0361032	0.0356032	0.464762	0.0244	0.197541	0.313297
36	501.017	5888.86	0.0137351	0.0371026	0.0366029	0.464926	0.0244214	0.197344	0.313309	36	454.818	3210.71	5.30103	0.0371026	0.0366029	0.46507	0.0244258	0.197195	0.313309
37	501.096	5892.51	0.0153125	0.0381031	0.0376028	0.465254	0.0244495	0.196974	0.313322	37	454.818	3210.71	5.30103	0.0381031	0.0376028	0.465408	0.0244542	0.196815	0.313323
38	501.182	5896.52	0.0170393	0.0391026	0.0386028	0.465613	0.0244803	0.19657	0.313337	38	454.818	3210.71	5.30103	0.0391026	0.0386028	0.465777	0.0244853	0.1964	0.313338
39	501.277	5900.89	0.018924	0.0401035	0.0396031	0.466006	0.0245139	0.196127	0.313353	39	454.818	3210.71	5.30103	0.0401035	0.0396031	0.46618	0.0245192	0.195947	0.313354
40	501.379	5905.66	0.0209782	0.0411036	0.0406035	0.466434	0.0245507	0.195646	0.31337	40	454.818	3210.71	5.30103	0.0411036	0.0406035	0.466619	0.0245563	0.195454	0.313371
41	501.491	5910.82	0.0232061	0.0421038	0.0416037	0.466898	0.0245906	0.195122	0.313389	41	454.818	3210.71	5.30103	0.0421038	0.0416037	0.467095	0.0245965	0.194918	0.31339
42	501.611	5916.42	0.0256182	0.043104	0.0426039	0.467402	0.0246338	0.194556	0.313409	42	454.818	3210.71	5.30103	0.043104	0.0426039	0.467613	0.0246403	0.194337	0.31341
43	501.741	5922.46	0.0282218	0.0441025	0.0436033	0.467945	0.0246806	0.193944	0.31343	43	454.818	3210.71	5.30103	0.0441025	0.0436033	0.468176	0.0246876	0.193705	0.313431
44	501.883	5929	0.0310434	0.0451024	0.0446025	0.468534	0.0247314	0.193281	0.313453	44	454.818	3210.71	5.30103	0.0451024	0.0446025	0.468787	0.0247391	0.19302	0.313455
45	502.036	5936.11	0.0341102	0.0461025	0.0456025	0.469176	0.0247868	0.19256	0.313478	45	454.818	3210.71	5.30103	0.0461025	0.0456025	0.469452	0.0247952	0.192274	0.313479
46	502.203	5943.86	0.0374496	0.0471023	0.0466024	0.469874	0.0248472	0.191774	0.313505	46	454.818	3210.71	5.30103	0.0471023	0.0466024	0.470175	0.0248564	0.191462	0.313506
47	502.385	5952.3	0.0410891	0.0481022	0.0476023	0.470637	0.0249132	0.190917	0.313534	47	454.818	3210.71	5.30103	0.0481022	0.0476023	0.470963	0.0249232	0.190579	0.313535
48	502.583	5961.5	0.0450559	0.0491022	0.0486022	0.471468	0.0249854	0.189982	0.313565	48	454.818	3210.71	5.30103	0.0491022	0.0486022	0.47182	0.0249962	0.189618	0.313566
49	502.799	5971.52	0.0493764	0.0501023	0.0496023	0.472375	0.0250642	0.188963	0.313598	49	454.818	3210.71	5.30103	0.0501023	0.0496023	0.47275	0.0250758	0.188574	0.3136
50	503.034	5982.42	0.0540747	0.0511022	0.0506023	0.473362	0.0251502	0.187854	0.313634	50	454.818	3210.71	5.30103	0.0511022	0.0506023	0.473759	0.0251626	0.187442	0.313635
51	503.289	5994.25	0.0591773	0.0521023	0.0516022	0.474436	0.025244	0.186648	0.313672	51	454.818	3210.71	5.30103	0.0521023	0.0516022	0.474853	0.0252569	0.186217	0.313673
52	503.566	6007.08	0.0647073	0.0531023	0.0526023	0.475601	0.025346	0.185341	0.313712	52	454.818	3210.71	5.30103	0.0531023	0.0526023	0.476042	0.0253592	0.184892	0.313707
53	503.865	6020.95	0.0706867	0.0541023	0.0536023	0.476863	0.0254568	0.183925	0.313755	53	454.818	3210.71	5.30103	0.0541023	0.0536023	0.477354	0.025471	0.183463	0.313712
54	504.011	6027.75	0.0736193	0.054395	0.0542486	0.477482	0.0255113	0.183229	0.313778	54	454.818	3210.71	5.30103	0.054395	0.0542486	0.4783	0.0255544	0.182486	0.31366
55	504.324	6042.27	0.0798808	0.0553951	0.0548951	0.478808	0.0256359	0.181972	0.313584	55	454.818	3210.71	5.30103	0.0553951	0.0548951	0.47933	0.0256503	0.181466	0.313554
56	504.728	6061	0.0879549	0.0563952	0.0558952	0.480521	0.0257975	0.180347	0.313334	56	454.818	3210.71	5.30103	0.0563952	0.0558952	0.481071	0.0258148	0.179796	0.313319
57	505.161	6081.08	0.0966112	0.0573953	0.0568952	0.482362	0.0259718	0.1786	0.313066	57	454.818	3210.71	5.30103	0.0573953	0.0568952	0.482954	0.0259913	0.178002	0.313052
58	505.624	6102.54	0.105867	0.0583949	0.0578951	0.484336	0.0261594	0.176725	0.31278	58	454.818	3210.71	5.30103	0.0583949	0.0578951	0.484976	0.0261806	0.176078	0.312766
59	506.119	6125.5	0.115767	0.0593949	0.0588949	0.486451	0.0263614	0.174713	0.312474	59	454.818	3210.71	5.30103	0.0593949	0.0588949	0.48714	0.0263843	0.174016	0.312459
60	506.648	6150.04	0.126346	0.0603951	0.059895	0.488718	0.026579	0.172555	0.312148	60	454.818	3210.71	5.30103	0.0603951	0.059895	0.489456	0.0266036	0.171808	0.312132
61	507.213	6176.25	0.137644	0.061395	0.0608951	0.491146	0.0268132	0.170241	0.3118	61	454.818	3210.71	5.30103	0.061395	0.0608951	0.491933	0.0268396	0.169444	0.311783
62	507.815	6204.19	0.149693	0.0623949	0.061895	0.493742	0.0270651	0.167764	0.311429	62	454.818	3210.71	5.30103	0.0623949	0.061895	0.494578	0.0270932	0.166918	0.311412
63	508.457	6233.95	0.162523	0.0633948	0.0628949	0.496516	0.0273358	0.165114	0.311035	63	454.818	3210.71	5.30103	0.0633948	0.0628949	0.497398	0.0273657	0.16422	0.311017
64	509.138	6265.58	0.17616	0.0643948	0.0638948	0.499473	0.0276264	0.162285	0.310616	64	454.818	3210.71	5.30103	0.0643948	0.0638948	0.500401	0.0276579	0.161344	0.310597
65	509.861	6299.12	0.190622	0.0653948	0.0648948	0.502619	0.0279377	0.159271	0.310172	65	454.818	3210.71	5.30103	0.0653948	0.0648948	0.503591	0.027971	0.158285	0.310153
66	510.626	6334.6	0.205921	0.0663949	0.0658948	0.50596	0.0282708	0.156066	0.309703	66	454.818	3210.71	5.30103	0.0663949	0.0658948	0.506973	0.0283057	0.155037	0.309684
67	511.434	6372.05	0.222065	0.0673949	0.0668949	0.509497	0.0286264	0.152668	0.309209	67	454.818	3210.71	5.30103	0.0673949	0.0668949	0.510548	0.0286628	0.151599	0.30919
68	512.283	6411.44	0.239048	0.0683949	0.0678949	0.513231	0.0290051	0.149073	0.308691	68	454.818	3210.71	5.30103	0.0683949	0.0678949	0.514317	0.0290431	0.147968	0.308671
69	513.174	6452.76	0.256865	0.0693949	0.0688949	0.517163	0.0294076	0.145283	0.308147	69	454.818	3210.71	5.30103	0.0693949	0.0688949	0.51828	0.0294471	0.144145	0.308128
70	514.105	6495.98	0.2755	0.0703949	0.0698949	0.52129	0.0298345	0.141296	0.307579	70	454.818	3210.71	5.30103	0.0703949	0.0698949	0.522434	0.0298752	0.140131	0.30756
71	515.077	6541.04	0.294928	0.0713948	0.0708949	0.525609	0.030286	0.137117	0.306988	71	454.818	3210.71	5.30103	0.0713948	0.0708949	0.526774	0.0303279	0.135929	0.306969
72	516.086	6587.87	0.315117	0.0723948	0.0718948	0.530113	0.0307623	0.13275	0.306375	72	454.818	3210.71	5.30103	0.0723948	0.0718948	0.531294	0.0308052	0.131544	0.306356
73	517.132	6636.37	0.336027	0.0733947	0.0728948	0.534794	0.0312635	0.128202	0.30574	73	454.818	3210.71	5.30103	0.0733947	0.0728948	0.535986	0.0313074	0.126984	0.305722
74	518.212	6686.47	0.35763	0.0743947	0.0738947	0.539644	0.03179	0.123479	0.305086	74	454.818	3210.71	5.30103	0.0743947	0.0738947	0.540837	0.0318346	0.12226	0.305068
75	519.325	6738.09	0.379886	0.0753948	0.0748948	0.544657	0.0323418	0.118588	0.304413	75	454.818	3210.71	5.30103	0.0753948	0.0748948	0.545832	0.0323866	0.117385	0.304396
76	520.468	6791.12	0.402749	0.0763948	0.0758948	0.549819	0.0329189	0.11354	0.303722	76	454.818	3210.71	5.30103	0.0763948	0.0758948	0.550946	0.0329629	0.112383	0.303708
77	521.638	6845.41	0.426158	0.0773948	0.0768948	0.555117	0.0335209	0.108346	0.303016	77	454.818	3210.71	5.30103	0.0773948	0.0768948	0.55614	0.0335615	0.107284	0.303015
78	522.833	6900.82	0.450047	0.0783948	0.0778948	0.560531	0.0341472	0.103026	0.302296	78	454.818	3210.71	5.30103	0.0783948	0.0778948	0.561344	0.0341754	0.102123	0.302357
79	524.012	6963.14	0.473633	0.0793948	0.0788948	0.565909	0.0347702	0.0975869	0.301734	79	454.818	3210.71	5.30103	0.0793948	0.0788948	0.566446	0.034787	0.0969409	0.301826
80	525.148	7035.92	0.496361	0.0803949	0.0798949	0.57114	0.0353702	0.0920515	0.301438	80	454.818	3210.71	5.30103	0.0803949	0.0798949	0.571384	0.0353877	0.091777	0.301451
81	526.293	7109.25	0.519258	0.0813949	0.0808949	0.57641	0.0359876	0.0864653	0.301137	81	454.818	3210.71	5.30103	0.0813949	0.0808949	0.576206	0.0359909	0.0866661	0.301137
82	527.442	7182.8	0.542227	0.0823949	0.0818949	0.58169	0.0366208	0.0808568	0.300833	82	454.818	3210.71	5.30103	0.0823949	0.0818949	0.580952	0.0365865	0.081616	0.300845
83	528.589	7256.27	0.56517	0.0833949	0.0828949	0.58695	0.0372679	0.075257	0.300526	83	454.818	3210.71	5.30103	0.0833949	0.0828949	0.585666	0.037105	0.0766094	0.300619
84	528.941	7278.82	0.572212	0.0834678	0.0834313	0.588566	0.0374691	0.0735344	0.300431	84	454.818	3210.71	5.30103	0.0834678	0.0834313	0.588183	0.0372957	0.0739277	0.300593
85	528.944	7279.03	0.572278	0.0844706	0.0839692	0.589493	0.0374008	0.0726528	0.300454	85	454.818	3210.71	5.30103	0.0844706	0.0839692	0.590646	0.0374399	0.0712342	0.30068
86	528.948	7279.25	0.572347	0.0851727	0.0848216	0.590468	0.0373289	0.0717256	0.300477	86	454.818	3210.71	5.30103	0.0851727	0.0848216	0.594237	0.0376516	0.0669372	0.301174
87	531.191	7422.92	0.617212	0.0861727	0.0856727	0.59461	0.0378793	0.065269	0.302242	87	454.818	3210.71	5.30103	0.0861727	0.0856727	0.597097	0.037999	0.0625909	0.302313
88	533.489	7570.12	0.663179	0.0871727	0.0866727	0.598917	0.0384762	0.0586184	0.303988	88	454.818	3210.71	5.30103	0.0871727	0.0866727	0.600069	0.038521	0.057461	0.303949
89	535.655	7708.83	0.706495	0.0881726	0.0876727	0.603001	0.039071	0.0523479	0.30558	89	454.818	3210.71	5.30103	0.0881726	0.0876727	0.603016	0.0390773	0.0523747	0.305532
90	537.695	7839.45	0.747286	0.0891727	0.0886727	0.606835	0.0396617	0.0464702	0.307033	90	454.818	3210.71	5.30103	0.0891727	0.0886727	0.605973	0.0396412	0.0473979	0.306988
91	539.614	7962.36	0.785668	0.0901727	0.0896727	0.610397	0.0402468	0.040996	0.30836	91	454.818	3210.71	5.30103	0.0901727	0.0896727	0.608877	0.0402062	0.0425969	0.30832
92	541.418	8077.92	0.821755	0.0911727	0.0906727	0.613669	0.0408255	0.0359317	0.309574	92	454.818	3210.71	5.30103	0.0911727	0.0906727	0.611663	0.0407696	0.0380303	0.309537
93	543.114	8186.51	0.855666	0.0921727	0.0916727	0.616638	0.0413971	0.0312799	0.310685	93	454.818	3210.71	5.30103	0.0921727	0.0916727	0.614277	0.0413297	0.0337426	0.310651
94	544.707	8288.54	0.88753	0.0931727	0.0926727	0.619298	0.0419617	0.0270387	0.311702	94	454.818	3210.71	5.30103	0.0931727	0.0926727	0.61668	0.0418857	0.0297631	0.311672
95	546.205	8384.46	0.917484	0.0941727	0.0936727	0.621644	0.0425197	0.0232018	0.312634	95	454.818	3210.71	5.30103	0.0941727	0.0936727	0.618849	0.0424376	0.0261065	0.312607
96	547.614	8474.75	0.94568	0.0951727	0.0946727	0.623678	0.043072	0.0197589	0.313491	96	454.818	3210.71	5.30103	0.0951727	0.0946727	0.620771	0.042986	0.0227759	0.313467
97	548.944	8559.93	0.972279	0.0961726	0.0956727	0.625405	0.0436201	0.0166953	0.31428	97	454.818	3210.71	5.30103	0.0961726	0.0956727	0.622443	0.0435321	0.0197658	0.314259
98	550.203	8640.55	0.997456	0.0971727	0.0966727	0.626832	0.0441657	0.0139926	0.315009	98	454.818	3210.71	5.30103	0.0971727	0.0966727	0.623867	0.0440775	0.0170642	0.314991
99	551.4	8717.2	1.02139	0.0981727	0.0976727	0.627973	0.0447113	0.0116297	0.315686	99	454.818	3210.71	5.30103	0.0981727	0.0976727	0.625049	0.0446245	0.0146551	0.315671
100	552.544	8790.49	1.04428	0.0991727	0.0986727	0.62884	0.0452594	0.00958267	0.316318	100	454.818	3210.71	5.30103	0.0991727	0.0986727	0.625999	0.0451754	0.01252	0.316306
101	553.646	8861.03	1.06631	0.100173	0.0996727	0.629449	0.0458131	0.00782606	0.316912	101	454.818	3210.71	5.30103	0.100173	0.0996727	0.626726	0.045733	0.0106385	0.316903
102	554.714	8929.47	1.08768	0.101173	0.100673	0.629817	0.0463756	0.00633302	0.317475	102	454.818	3210.71	5.30103	0.101173	0.100673	0.627247	0.0462975	0.00898978	0.317465
103	555.76	8996.43	1.10859	0.102173	0.101673	0.62996	0.0469507	0.00507654	0.318013	103	454.818	3210.71	5.30103	0.102173	0.101673	0.627605	0.0468547	0.007553	0.317988
104	556.792	9062.54	1.12923	0.103173	0.102673	0.629897	0.047542	0.00402979	0.318531	104	454.818	3210.71	5.30103	0.103173	0.102673	0.627934	0.0473355	0.0063083	0.318422
105	557.078	9080.82	1.13494	0.103206	0.103189	0.629864	0.0477081	0.0037544	0.318673	105	454.818	3210.71	5.30103	0.103206	0.103189	0.628192	0.0474994	0.00573283	0.318575
106	557.178	9087.26	1.13696	0.104206	0.103706	0.630281	0.047733	0.003254	0.318732	106	454.818	3210.71	5.30103	0.104206	0.103706	0.628509	0.0476076	0.00520081	0.318683
107	557.303	9095.22	1.13944	0.105206	0.104706	0.630795	0.0477639	0.00263511	0.318806	107	454.818	3210.71	5.30103	0.105206	0.104706	0.62922	0.0476976	0.00428761	0.318795
108	557.413	9102.3	1.14165	0.106206	0.105706	0.631253	0.0477914	0.00208469	0.318871	108	454.818	3210.71	5.30103	0.106206	0.105706	0.629884	0.0477412	0.00350826	0.318867
109	557.509	9108.47	1.14358	0.107206	0.106706	0.631652	0.0478154	0.00160478	0.318928	109	454.818	3210.71	5.30103	0.107206	0.106706	0.630455	0.0477743	0.00284573	0.318925
110	557.591	9113.73	1.14522	0.108206	0.107706	0.631993	0.0478359	0.0011957	0.318976	110	454.818	3210.71	5.30103	0.108206	0.107706	0.630917	0.0478154	0.00228468	0.318983
111	557.66	9118.09	1.14658	0.109207	0.108707	0.632275	0.0478529	0.000856157	0.319016	111	454.818	3210.71	5.30103	0.109207	0.108707	0.631179	0.0479288	0.00181026	0.319081
112	557.691	9120.09	1.14721	0.109518	0.109362	0.632405	0.0478608	0.000700292	0.319034	112	454.818	3210.71	5.30103	0.109518	0.109362	0.631074	0.048149	0.00153866	0.319239
113	558.61	9178.96	1.16559	0.110518	0.110018	0.631589	0.0484766	0.000473087	0.319461	113	454.818	3210.71	5.30103	0.110518	0.110018	0.630697	0.0485183	0.00129478	0.31949
114	559.755	9252.29	1.18849	0.111518	0.111018	0.630479	0.0492608	0.000278326	0.319982	114	454.818	3210.71	5.30103	0.111518	0.111018	0.62978	0.0492746	0.000969673	0.319976
115	560.947	9327.17	1.21233	0.112518	0.112018	0.629276	0.0501057	0.000155056	0.320463	115	454.818	3210.71	5.30103	0.112518	0.112018	0.628722	0.0501236	0.000689743	0.320464
116	562.197	9405.24	1.23733	0.113518	0.113018	0.627964	0.0510127	8.37518e-05	0.32094	116	454.818	3210.71	5.30103	0.113518	0.113018	0.627569	0.0510384	0.000443918	0.320949
117	563.518	9487.71	1.26375	0.114518	0.114018	0.626543	0.0519876	3.77236e-05	0.321431	117	454.818	3210.71	5.30103	0.114518	0.114018	0.626322	0.052016	0.000221578	0.321441
118	564.916	9575.03	1.29172	0.115518	0.115018	0.62501	0.0530378	1.2561e-05	0.321939	118	454.818	3210.71	5.30103	0.115518	0.115018	0.62501	0.0530378	1.2561e-05	0.321939

## Sheet: B-50_4
Path B-50_4: Primary										Path B-50_4: Diffused
Shell	temperature (｡C)	pressure (bar)	tot.time (my)	radius (cm)	X(node) (cm)	Xfe	Xmg	Xmn	Xca	Shell	temperature (｡C)	pressure (bar)	tot.time (my)	radius (cm)	X(node) (cm)	Xfe	Xmg	Xmn	Xca
1	501.741	5922.46	0.0282218	0.000998469	0.000499235	0.467945	0.0246806	0.193944	0.31343	1	454.818	3210.71	5.30103	0.000998469	0.000499235	0.470335	0.024782	0.191421	0.313461
2	501.883	5929	0.0310434	0.0019984	0.00149843	0.468534	0.0247314	0.193281	0.313453	2	454.818	3210.71	5.30103	0.0019984	0.00149843	0.470411	0.0247934	0.191328	0.313467
3	502.036	5936.11	0.0341102	0.00299848	0.00249844	0.469176	0.0247868	0.19256	0.313478	3	454.818	3210.71	5.30103	0.00299848	0.00249844	0.470746	0.0248353	0.190932	0.313487
4	502.203	5943.86	0.0374496	0.00399825	0.00349837	0.469874	0.0248472	0.191774	0.313505	4	454.818	3210.71	5.30103	0.00399825	0.00349837	0.471251	0.0248892	0.190348	0.313513
5	502.385	5952.3	0.0410891	0.00499818	0.00449822	0.470637	0.0249132	0.190917	0.313534	5	454.818	3210.71	5.30103	0.00499818	0.00449822	0.471892	0.0249515	0.189616	0.31354
6	502.583	5961.5	0.0450559	0.00599819	0.00549819	0.471468	0.0249854	0.189982	0.313565	6	454.818	3210.71	5.30103	0.00599819	0.00549819	0.472649	0.0250214	0.188759	0.313571
7	502.799	5971.52	0.0493764	0.00699831	0.00649825	0.472375	0.0250642	0.188963	0.313598	7	454.818	3210.71	5.30103	0.00699831	0.00649825	0.47351	0.025099	0.187787	0.313604
8	503.034	5982.42	0.0540747	0.00799815	0.00749823	0.473362	0.0251502	0.187854	0.313634	8	454.818	3210.71	5.30103	0.00799815	0.00749823	0.47447	0.0251842	0.186707	0.313639
9	503.289	5994.25	0.0591773	0.00899826	0.00849821	0.474436	0.025244	0.186648	0.313672	9	454.818	3210.71	5.30103	0.00899826	0.00849821	0.475528	0.0252775	0.185518	0.313676
10	503.566	6007.08	0.0647073	0.0099983	0.00949828	0.475601	0.025346	0.185341	0.313712	10	454.818	3210.71	5.30103	0.0099983	0.00949828	0.476693	0.025379	0.18422	0.313708
11	503.865	6020.95	0.0706867	0.0109983	0.0104983	0.476863	0.0254568	0.183925	0.313755	11	454.818	3210.71	5.30103	0.0109983	0.0104983	0.477992	0.0254906	0.182809	0.313708
12	504.011	6027.75	0.0736193	0.011291	0.0111446	0.477482	0.0255113	0.183229	0.313778	12	454.818	3210.71	5.30103	0.011291	0.0111446	0.478933	0.0255745	0.181841	0.313652
13	504.324	6042.27	0.0798808	0.0122911	0.011791	0.478808	0.0256359	0.181972	0.313584	13	454.818	3210.71	5.30103	0.0122911	0.011791	0.479957	0.0256706	0.18083	0.313542
14	504.728	6061	0.0879549	0.0132912	0.0127911	0.480521	0.0257975	0.180347	0.313334	14	454.818	3210.71	5.30103	0.0132912	0.0127911	0.481689	0.0258348	0.179171	0.313305
15	505.161	6081.08	0.0966112	0.0142912	0.0137912	0.482362	0.0259718	0.1786	0.313066	15	454.818	3210.71	5.30103	0.0142912	0.0137912	0.483566	0.026011	0.177385	0.313038
16	505.624	6102.54	0.105867	0.0152908	0.014791	0.484336	0.0261594	0.176725	0.31278	16	454.818	3210.71	5.30103	0.0152908	0.014791	0.485583	0.0262002	0.175465	0.312752
17	506.119	6125.5	0.115767	0.0162909	0.0157909	0.486451	0.0263614	0.174713	0.312474	17	454.818	3210.71	5.30103	0.0162909	0.0157909	0.487746	0.026404	0.173404	0.312446
18	506.648	6150.04	0.126346	0.017291	0.016791	0.488718	0.026579	0.172555	0.312148	18	454.818	3210.71	5.30103	0.017291	0.016791	0.490064	0.0266233	0.171194	0.312119
19	507.213	6176.25	0.137644	0.018291	0.017791	0.491146	0.0268132	0.170241	0.3118	19	454.818	3210.71	5.30103	0.018291	0.017791	0.492543	0.0268594	0.168827	0.31177
20	507.815	6204.19	0.149693	0.0192909	0.018791	0.493742	0.0270651	0.167764	0.311429	20	454.818	3210.71	5.30103	0.0192909	0.018791	0.495193	0.0271133	0.166295	0.311398
21	508.457	6233.95	0.162523	0.0202908	0.0197908	0.496516	0.0273358	0.165114	0.311035	21	454.818	3210.71	5.30103	0.0202908	0.0197908	0.498021	0.0273861	0.16359	0.311003
22	509.138	6265.58	0.17616	0.0212908	0.0207908	0.499473	0.0276264	0.162285	0.310616	22	454.818	3210.71	5.30103	0.0212908	0.0207908	0.501031	0.0276787	0.160706	0.310584
23	509.861	6299.12	0.190622	0.0222908	0.0217908	0.502619	0.0279377	0.159271	0.310172	23	454.818	3210.71	5.30103	0.0222908	0.0217908	0.504231	0.0279921	0.157637	0.31014
24	510.626	6334.6	0.205921	0.0232909	0.0227908	0.50596	0.0282708	0.156066	0.309703	24	454.818	3210.71	5.30103	0.0232909	0.0227908	0.507623	0.0283272	0.154379	0.309671
25	511.434	6372.05	0.222065	0.0242909	0.0237909	0.509497	0.0286264	0.152668	0.309209	25	454.818	3210.71	5.30103	0.0242909	0.0237909	0.511209	0.0286848	0.150929	0.309177
26	512.283	6411.44	0.239048	0.0252909	0.0247909	0.513231	0.0290051	0.149073	0.308691	26	454.818	3210.71	5.30103	0.0252909	0.0247909	0.514989	0.0290655	0.147287	0.308658
27	513.174	6452.76	0.256865	0.0262908	0.0257909	0.517163	0.0294076	0.145283	0.308147	27	454.818	3210.71	5.30103	0.0262908	0.0257909	0.518963	0.0294699	0.143452	0.308115
28	514.105	6495.98	0.2755	0.0272908	0.0267908	0.52129	0.0298345	0.141296	0.307579	28	454.818	3210.71	5.30103	0.0272908	0.0267908	0.523129	0.0298986	0.139425	0.307547
29	515.077	6541.04	0.294928	0.0282908	0.0277908	0.525609	0.030286	0.137117	0.306988	29	454.818	3210.71	5.30103	0.0282908	0.0277908	0.527481	0.0303517	0.13521	0.306957
30	516.086	6587.87	0.315117	0.0292908	0.0287908	0.530113	0.0307623	0.13275	0.306375	30	454.818	3210.71	5.30103	0.0292908	0.0287908	0.532013	0.0308296	0.130813	0.306344
31	517.132	6636.37	0.336027	0.0302907	0.0297907	0.534794	0.0312635	0.128202	0.30574	31	454.818	3210.71	5.30103	0.0302907	0.0297907	0.536717	0.0313324	0.12624	0.30571
32	518.212	6686.47	0.35763	0.0312907	0.0307907	0.539644	0.03179	0.123479	0.305086	32	454.818	3210.71	5.30103	0.0312907	0.0307907	0.54158	0.0318601	0.121504	0.305057
33	519.325	6738.09	0.379886	0.0322907	0.0317907	0.544657	0.0323418	0.118588	0.304413	33	454.818	3210.71	5.30103	0.0322907	0.0317907	0.546584	0.0324126	0.116619	0.304384
34	520.468	6791.12	0.402749	0.0332907	0.0327907	0.549819	0.0329189	0.11354	0.303722	34	454.818	3210.71	5.30103	0.0332907	0.0327907	0.551706	0.0329893	0.111608	0.303697
35	521.638	6845.41	0.426158	0.0342907	0.0337907	0.555117	0.0335209	0.108346	0.303016	35	454.818	3210.71	5.30103	0.0342907	0.0337907	0.556904	0.0335883	0.106504	0.303004
36	522.833	6900.82	0.450047	0.0352908	0.0347907	0.560531	0.0341472	0.103026	0.302296	36	454.818	3210.71	5.30103	0.0352908	0.0347907	0.562107	0.0342022	0.101343	0.302348
37	524.012	6963.14	0.473633	0.0362908	0.0357908	0.565909	0.0347702	0.0975869	0.301734	37	454.818	3210.71	5.30103	0.0362908	0.0357908	0.567202	0.0348135	0.0961652	0.301819
38	525.148	7035.92	0.496361	0.0372909	0.0367908	0.57114	0.0353702	0.0920515	0.301438	38	454.818	3210.71	5.30103	0.0372909	0.0367908	0.57213	0.035414	0.0910094	0.301446
39	526.293	7109.25	0.519258	0.0382909	0.0377909	0.57641	0.0359876	0.0864653	0.301137	39	454.818	3210.71	5.30103	0.0382909	0.0377909	0.576943	0.036017	0.0859073	0.301133
40	527.442	7182.8	0.542227	0.0392909	0.0387909	0.58169	0.0366208	0.0808568	0.300833	40	454.818	3210.71	5.30103	0.0392909	0.0387909	0.581683	0.0366119	0.0808628	0.300842
41	528.589	7256.27	0.56517	0.0402908	0.0397909	0.58695	0.0372679	0.075257	0.300526	41	454.818	3210.71	5.30103	0.0402908	0.0397909	0.586398	0.0371287	0.0758557	0.300618
42	528.941	7278.82	0.572212	0.0403638	0.0403273	0.588566	0.0374691	0.0735344	0.300431	42	454.818	3210.71	5.30103	0.0403638	0.0403273	0.588917	0.0373184	0.0731709	0.300594
43	528.944	7279.03	0.572278	0.0413665	0.0408652	0.589493	0.0374008	0.0726528	0.300454	43	454.818	3210.71	5.30103	0.0413665	0.0408652	0.591381	0.0374622	0.0704731	0.300684
44	528.948	7279.25	0.572347	0.0420686	0.0417176	0.590468	0.0373289	0.0717256	0.300477	44	454.818	3210.71	5.30103	0.0420686	0.0417176	0.594973	0.0376751	0.0661664	0.301185
45	531.191	7422.91	0.617212	0.0430687	0.0425687	0.59461	0.0378793	0.065269	0.302242	45	454.818	3210.71	5.30103	0.0430687	0.0425687	0.597835	0.0380245	0.0618108	0.302329
46	533.489	7570.11	0.663179	0.0440687	0.0435687	0.598917	0.0384762	0.0586184	0.303988	46	454.818	3210.71	5.30103	0.0440687	0.0435687	0.600813	0.0385477	0.056673	0.303966
47	535.655	7708.82	0.706495	0.0450686	0.0445686	0.603001	0.039071	0.0523479	0.30558	47	454.818	3210.71	5.30103	0.0450686	0.0445686	0.603762	0.0391044	0.0515859	0.305547
48	537.695	7839.45	0.747286	0.0460687	0.0455686	0.606835	0.0396617	0.0464702	0.307033	48	454.818	3210.71	5.30103	0.0460687	0.0455686	0.606712	0.0396683	0.0466177	0.307002
49	539.614	7962.35	0.785668	0.0470687	0.0465687	0.610397	0.0402468	0.040996	0.30836	49	454.818	3210.71	5.30103	0.0470687	0.0465687	0.6096	0.0402328	0.0418352	0.308332
50	541.418	8077.91	0.821755	0.0480687	0.0475687	0.613669	0.0408255	0.0359317	0.309574	50	454.818	3210.71	5.30103	0.0480687	0.0475687	0.61236	0.0407955	0.0372961	0.309548
51	543.114	8186.5	0.855666	0.0490687	0.0485687	0.616638	0.0413971	0.0312799	0.310685	51	454.818	3210.71	5.30103	0.0490687	0.0485687	0.614941	0.0413547	0.0330436	0.310661
52	544.707	8288.54	0.88753	0.0500687	0.0495687	0.619298	0.0419617	0.0270387	0.311702	52	454.818	3210.71	5.30103	0.0500687	0.0495687	0.617305	0.0419097	0.0291049	0.31168
53	546.205	8384.46	0.917484	0.0510686	0.0505686	0.621644	0.0425197	0.0232018	0.312634	53	454.818	3210.71	5.30103	0.0510686	0.0505686	0.619431	0.0424604	0.0254932	0.312615
54	547.614	8474.75	0.94568	0.0520686	0.0515686	0.623678	0.043072	0.0197589	0.313491	54	454.818	3210.71	5.30103	0.0520686	0.0515686	0.621309	0.0430074	0.0222098	0.313474
55	548.944	8559.93	0.972279	0.0530686	0.0525686	0.625405	0.0436201	0.0166953	0.31428	55	454.818	3210.71	5.30103	0.0530686	0.0525686	0.622935	0.0435521	0.0192479	0.314265
56	550.203	8640.55	0.997456	0.0540686	0.0535686	0.626832	0.0441657	0.0139926	0.315009	56	454.818	3210.71	5.30103	0.0540686	0.0535686	0.624313	0.0440961	0.0165944	0.314997
57	551.4	8717.2	1.02139	0.0550686	0.0545686	0.627973	0.0447113	0.0116297	0.315686	57	454.818	3210.71	5.30103	0.0550686	0.0545686	0.62545	0.0446417	0.0142325	0.315676
58	552.544	8790.49	1.04428	0.0560686	0.0555686	0.62884	0.0452594	0.00958267	0.316318	58	454.818	3210.71	5.30103	0.0560686	0.0555686	0.626355	0.0451914	0.0121428	0.316311
59	553.646	8861.03	1.06631	0.0570686	0.0565686	0.629449	0.0458131	0.00782606	0.316912	59	454.818	3210.71	5.30103	0.0570686	0.0565686	0.627041	0.0457477	0.0103045	0.316907
60	554.714	8929.47	1.08768	0.0580686	0.0575686	0.629817	0.0463756	0.00633302	0.317475	60	454.818	3210.71	5.30103	0.0580686	0.0575686	0.627524	0.0463109	0.00869636	0.317469
61	555.76	8996.43	1.10859	0.0590686	0.0585686	0.62996	0.0469507	0.00507654	0.318013	61	454.818	3210.71	5.30103	0.0590686	0.0585686	0.627845	0.0468665	0.00729719	0.317991
62	556.792	9062.53	1.12923	0.0600685	0.0595686	0.629897	0.047542	0.00402979	0.318531	62	454.818	3210.71	5.30103	0.0600685	0.0595686	0.628143	0.0473452	0.00608695	0.318425
63	557.078	9080.82	1.13494	0.0601023	0.0600854	0.629864	0.0477081	0.0037544	0.318673	63	454.818	3210.71	5.30103	0.0601023	0.0600854	0.628387	0.0475079	0.00552801	0.318577
64	557.178	9087.26	1.13696	0.0611024	0.0606024	0.630281	0.047733	0.003254	0.318732	64	454.818	3210.71	5.30103	0.0611024	0.0606024	0.628689	0.047615	0.00501168	0.318684
65	557.303	9095.22	1.13944	0.062102	0.0616022	0.630795	0.0477639	0.00263511	0.318806	65	454.818	3210.71	5.30103	0.062102	0.0616022	0.629375	0.0477034	0.00412641	0.318796
66	557.413	9102.3	1.14165	0.0631023	0.0626022	0.631253	0.0477914	0.00208469	0.318871	66	454.818	3210.71	5.30103	0.0631023	0.0626022	0.630015	0.047746	0.00337189	0.318867
67	557.509	9108.47	1.14358	0.0641024	0.0636024	0.631652	0.0478154	0.00160478	0.318928	67	454.818	3210.71	5.30103	0.0641024	0.0636024	0.630565	0.0477783	0.00273127	0.318926
68	557.591	9113.73	1.14522	0.0651023	0.0646024	0.631993	0.0478359	0.0011957	0.318976	68	454.818	3210.71	5.30103	0.0651023	0.0646024	0.631008	0.047819	0.00218945	0.318983
69	557.66	9118.09	1.14658	0.0661026	0.0656025	0.632275	0.0478529	0.000856157	0.319016	69	454.818	3210.71	5.30103	0.0661026	0.0656025	0.631253	0.0479328	0.00173186	0.319082
70	557.691	9120.09	1.14721	0.0664139	0.0662583	0.632405	0.0478608	0.000700292	0.319034	70	454.818	3210.71	5.30103	0.0664139	0.0662583	0.631136	0.0481539	0.00147019	0.31924
71	558.61	9178.96	1.16559	0.0674139	0.0669139	0.631589	0.0484766	0.000473087	0.319461	71	454.818	3210.71	5.30103	0.0674139	0.0669139	0.630748	0.0485239	0.00123549	0.319493
72	559.755	9252.28	1.18849	0.0684139	0.0679139	0.630479	0.0492608	0.000278326	0.319982	72	454.818	3210.71	5.30103	0.0684139	0.0679139	0.629818	0.0492805	0.000923134	0.319978
73	560.947	9327.17	1.21233	0.0694139	0.0689139	0.629276	0.0501057	0.000155056	0.320463	73	454.818	3210.71	5.30103	0.0694139	0.0689139	0.628749	0.0501294	0.000654907	0.320467
74	562.197	9405.23	1.23733	0.0704139	0.0699139	0.627964	0.0510127	8.37518e-05	0.32094	74	454.818	3210.71	5.30103	0.0704139	0.0699139	0.627585	0.0510439	0.00042029	0.320951
75	563.518	9487.71	1.26375	0.0714139	0.0709139	0.626543	0.0519876	3.77236e-05	0.321431	75	454.818	3210.71	5.30103	0.0714139	0.0709139	0.626328	0.0520205	0.000209312	0.321443
76	564.916	9575.02	1.29172	0.0724139	0.0719139	0.62501	0.0530378	1.2561e-05	0.321939	76	454.818	3210.71	5.30103	0.0724139	0.0719139	0.62501	0.0530378	1.2561e-05	0.321939

## Sheet: B-50_6
Path B-50_6: Primary										Path B-50_6: Diffused
Shell	temperature (｡C)	pressure (bar)	tot.time (my)	radius (cm)	X(node) (cm)	Xfe	Xmg	Xmn	Xca	Shell	temperature (｡C)	pressure (bar)	tot.time (my)	radius (cm)	X(node) (cm)	Xfe	Xmg	Xmn	Xca
1	517.132	6636.37	0.336027	0.000999895	0.000499948	0.534794	0.0312635	0.128202	0.30574	1	454.818	3210.71	5.30103	0.000999895	0.000499948	0.55584	0.0323127	0.106972	0.304875
2	518.212	6686.47	0.35763	0.0019999	0.0014999	0.539644	0.03179	0.123479	0.305086	2	454.818	3210.71	5.30103	0.0019999	0.0014999	0.55634	0.0324283	0.106512	0.30472
3	519.325	6738.09	0.379886	0.00299994	0.00249992	0.544657	0.0323418	0.118588	0.304413	3	454.818	3210.71	5.30103	0.00299994	0.00249992	0.558437	0.032834	0.104547	0.304182
4	520.468	6791.12	0.402749	0.00399994	0.00349994	0.549819	0.0329189	0.11354	0.303722	4	454.818	3210.71	5.30103	0.00399994	0.00349994	0.561434	0.0333291	0.101687	0.30355
5	521.638	6845.41	0.426158	0.00499993	0.00449993	0.555117	0.0335209	0.108346	0.303016	5	454.818	3210.71	5.30103	0.00499993	0.00449993	0.565042	0.0338722	0.0981933	0.302893
6	522.833	6900.82	0.450047	0.00599995	0.00549994	0.560531	0.0341472	0.103026	0.302296	6	454.818	3210.71	5.30103	0.00599995	0.00549994	0.569026	0.0344441	0.0942611	0.302269
7	524.012	6963.14	0.473633	0.00699999	0.00649997	0.565909	0.0347702	0.0975869	0.301734	7	454.818	3210.71	5.30103	0.00699999	0.00649997	0.57317	0.0350224	0.0900392	0.301769
8	525.148	7035.92	0.496361	0.00800006	0.00750003	0.57114	0.0353702	0.0920515	0.301438	8	454.818	3210.71	5.30103	0.00800006	0.00750003	0.577351	0.0355974	0.0856377	0.301414
9	526.293	7109.25	0.519258	0.00900006	0.00850006	0.57641	0.0359876	0.0864653	0.301137	9	454.818	3210.71	5.30103	0.00900006	0.00850006	0.581583	0.0361806	0.0811282	0.301108
10	527.442	7182.8	0.542227	0.0100001	0.00950007	0.58169	0.0366208	0.0808568	0.300833	10	454.818	3210.71	5.30103	0.0100001	0.00950007	0.58588	0.0367574	0.0765387	0.300823
11	528.589	7256.27	0.56517	0.011	0.0105001	0.58695	0.0372679	0.075257	0.300526	11	454.818	3210.71	5.30103	0.011	0.0105001	0.590266	0.0372534	0.0718697	0.30061
12	528.941	7278.82	0.572212	0.011073	0.0110365	0.588566	0.0374691	0.0735344	0.300431	12	454.818	3210.71	5.30103	0.011073	0.0110365	0.592641	0.0374334	0.0693281	0.300597
13	528.944	7279.03	0.572278	0.0120757	0.0115744	0.589493	0.0374008	0.0726528	0.300454	13	454.818	3210.71	5.30103	0.0120757	0.0115744	0.594967	0.0375706	0.0667602	0.300703
14	528.948	7279.25	0.572347	0.0127778	0.0124268	0.590468	0.0373289	0.0717256	0.300477	14	454.818	3210.71	5.30103	0.0127778	0.0124268	0.59836	0.0377831	0.0626223	0.301235
15	531.191	7422.91	0.617212	0.0137779	0.0132779	0.59461	0.0378793	0.065269	0.302242	15	454.818	3210.71	5.30103	0.0137779	0.0132779	0.601049	0.0381351	0.0584165	0.3024
16	533.489	7570.11	0.663179	0.0147779	0.0142779	0.598917	0.0384762	0.0586184	0.303988	16	454.818	3210.71	5.30103	0.0147779	0.0142779	0.603864	0.0386568	0.0534434	0.304036
17	535.655	7708.82	0.706495	0.0157778	0.0152778	0.603001	0.039071	0.0523479	0.30558	17	454.818	3210.71	5.30103	0.0157778	0.0152778	0.606658	0.039209	0.0485258	0.305607
18	537.695	7839.45	0.747286	0.0167779	0.0162778	0.606835	0.0396617	0.0464702	0.307033	18	454.818	3210.71	5.30103	0.0167779	0.0162778	0.60944	0.0397675	0.0437405	0.307052
19	539.614	7962.35	0.785668	0.0177779	0.0172779	0.610397	0.0402468	0.040996	0.30836	19	454.818	3210.71	5.30103	0.0177779	0.0172779	0.612144	0.0403262	0.0391554	0.308374
20	541.418	8077.91	0.821755	0.0187779	0.0182779	0.613669	0.0408255	0.0359317	0.309574	20	454.818	3210.71	5.30103	0.0187779	0.0182779	0.614709	0.0408826	0.0348248	0.309584
21	543.114	8186.5	0.855666	0.0197779	0.0192779	0.616638	0.0413971	0.0312799	0.310685	21	454.818	3210.71	5.30103	0.0197779	0.0192779	0.617087	0.0414354	0.0307861	0.310691
22	544.707	8288.54	0.88753	0.0207779	0.0202779	0.619298	0.0419617	0.0270387	0.311702	22	454.818	3210.71	5.30103	0.0207779	0.0202779	0.619249	0.0419838	0.0270609	0.311706
23	546.205	8384.46	0.917484	0.0217778	0.0212778	0.621644	0.0425197	0.0232018	0.312634	23	454.818	3210.71	5.30103	0.0217778	0.0212778	0.621177	0.0425282	0.0236575	0.312637
24	547.614	8474.75	0.94568	0.0227778	0.0222778	0.623678	0.043072	0.0197589	0.313491	24	454.818	3210.71	5.30103	0.0227778	0.0222778	0.622864	0.0430691	0.0205736	0.313493
25	548.944	8559.93	0.972279	0.0237778	0.0232778	0.625405	0.0436201	0.0166953	0.31428	25	454.818	3210.71	5.30103	0.0237778	0.0232778	0.62431	0.0436079	0.0178	0.314282
26	550.203	8640.55	0.997456	0.0247778	0.0242778	0.626832	0.0441657	0.0139926	0.315009	26	454.818	3210.71	5.30103	0.0247778	0.0242778	0.62552	0.0441465	0.015322	0.315011
27	551.4	8717.2	1.02139	0.0257778	0.0252778	0.627973	0.0447113	0.0116297	0.315686	27	454.818	3210.71	5.30103	0.0257778	0.0252778	0.626502	0.044687	0.0131218	0.315689
28	552.544	8790.49	1.04428	0.0267778	0.0262778	0.62884	0.0452594	0.00958267	0.316318	28	454.818	3210.71	5.30103	0.0267778	0.0262778	0.627267	0.045232	0.0111797	0.316322
29	553.646	8861.03	1.06631	0.0277778	0.0272778	0.629449	0.0458131	0.00782606	0.316912	29	454.818	3210.71	5.30103	0.0277778	0.0272778	0.627824	0.045784	0.00947495	0.316917
30	554.714	8929.47	1.08768	0.0287778	0.0282778	0.629817	0.0463756	0.00633302	0.317475	30	454.818	3210.71	5.30103	0.0287778	0.0282778	0.628192	0.0463431	0.00798649	0.317478
31	555.76	8996.43	1.10859	0.0297778	0.0292778	0.62996	0.0469507	0.00507654	0.318013	31	454.818	3210.71	5.30103	0.0297778	0.0292778	0.628413	0.0468945	0.00669369	0.317998
32	556.792	9062.53	1.12923	0.0307777	0.0302778	0.629897	0.047542	0.00402979	0.318531	32	454.818	3210.71	5.30103	0.0307777	0.0302778	0.628626	0.0473675	0.00557715	0.31843
33	557.078	9080.82	1.13494	0.0308115	0.0307946	0.629864	0.0477081	0.0037544	0.318673	33	454.818	3210.71	5.30103	0.0308115	0.0307946	0.62883	0.0475272	0.00506197	0.31858
34	557.178	9087.26	1.13696	0.0318116	0.0313116	0.630281	0.047733	0.003254	0.318732	34	454.818	3210.71	5.30103	0.0318116	0.0313116	0.629096	0.0476314	0.00458653	0.318686
35	557.303	9095.22	1.13944	0.0328112	0.0323114	0.630795	0.0477639	0.00263511	0.318806	35	454.818	3210.71	5.30103	0.0328112	0.0323114	0.629715	0.0477161	0.00377205	0.318797
36	557.413	9102.3	1.14165	0.0338115	0.0333114	0.631253	0.0477914	0.00208469	0.318871	36	454.818	3210.71	5.30103	0.0338115	0.0333114	0.630297	0.0477562	0.00307847	0.318868
37	557.509	9108.47	1.14358	0.0348116	0.0343116	0.631652	0.0478154	0.00160478	0.318928	37	454.818	3210.71	5.30103	0.0348116	0.0343116	0.630797	0.0477868	0.00249003	0.318926
38	557.591	9113.73	1.14522	0.0358115	0.0353116	0.631993	0.0478359	0.0011957	0.318976	38	454.818	3210.71	5.30103	0.0358115	0.0353116	0.631197	0.0478264	0.00199265	0.318984
39	557.66	9118.09	1.14658	0.0368118	0.0363117	0.632275	0.0478529	0.000856157	0.319016	39	454.818	3210.71	5.30103	0.0368118	0.0363117	0.631402	0.047941	0.00157288	0.319084
40	557.691	9120.09	1.14721	0.0371231	0.0369675	0.632405	0.0478608	0.000700292	0.319034	40	454.818	3210.71	5.30103	0.0371231	0.0369675	0.63126	0.0481635	0.00133302	0.319244
41	558.61	9178.96	1.16559	0.0381231	0.0376231	0.631589	0.0484766	0.000473087	0.319461	41	454.818	3210.71	5.30103	0.0381231	0.0376231	0.63085	0.0485349	0.00111813	0.319497
42	559.755	9252.28	1.18849	0.0391231	0.0386231	0.630479	0.0492608	0.000278326	0.319982	42	454.818	3210.71	5.30103	0.0391231	0.0386231	0.629892	0.049292	0.000832608	0.319983
43	560.947	9327.17	1.21233	0.0401231	0.0396231	0.629276	0.0501057	0.000155056	0.320463	43	454.818	3210.71	5.30103	0.0401231	0.0396231	0.6288	0.0501404	0.000588277	0.320472
44	562.197	9405.23	1.23733	0.0411231	0.0406231	0.627964	0.0510127	8.37518e-05	0.32094	44	454.818	3210.71	5.30103	0.0411231	0.0406231	0.627614	0.0510543	0.000375827	0.320956
45	563.518	9487.71	1.26375	0.0421231	0.0416231	0.626543	0.0519876	3.77236e-05	0.321431	45	454.818	3210.71	5.30103	0.0421231	0.0416231	0.626338	0.0520288	0.000186588	0.321446
46	564.916	9575.02	1.29172	0.0431231	0.0426231	0.62501	0.0530378	1.2561e-05	0.321939	46	454.818	3210.71	5.30103	0.0431231	0.0426231	0.62501	0.0530378	1.2561e-05	0.321939

## Sheet: B-50_8
Path B-50_8: Primary										Path B-50_8: Diffused
Shell	temperature (｡C)	pressure (bar)	tot.time (my)	radius (cm)	X(node) (cm)	Xfe	Xmg	Xmn	Xca	Shell	temperature (｡C)	pressure (bar)	tot.time (my)	radius (cm)	X(node) (cm)	Xfe	Xmg	Xmn	Xca
1	556.792	9062.53	1.12923	0.000999893	0.000499946	0.629897	0.047542	0.00402979	0.318531	1	454.818	3210.71	5.30103	0.000999893	0.000499946	0.63278	0.0477983	0.000718151	0.318703
2	557.078	9080.82	1.13494	0.0010337	0.00101679	0.629864	0.0477081	0.0037544	0.318673	2	454.818	3210.71	5.30103	0.0010337	0.00101679	0.632748	0.0478109	0.000710251	0.318731
3	557.178	9087.26	1.13696	0.00203381	0.00153375	0.630281	0.047733	0.003254	0.318732	3	454.818	3210.71	5.30103	0.00203381	0.00153375	0.63272	0.0478207	0.000699316	0.31876
4	557.303	9095.22	1.13944	0.00303342	0.00253361	0.630795	0.0477639	0.00263511	0.318806	4	454.818	3210.71	5.30103	0.00303342	0.00253361	0.632681	0.0478337	0.000663212	0.318822
5	557.413	9102.3	1.14165	0.0040337	0.00353356	0.631253	0.0477914	0.00208469	0.318871	5	454.818	3210.71	5.30103	0.0040337	0.00353356	0.632662	0.0478439	0.000613304	0.318881
6	557.509	9108.47	1.14358	0.0050338	0.00453375	0.631652	0.0478154	0.00160478	0.318928	6	454.818	3210.71	5.30103	0.0050338	0.00453375	0.632655	0.0478561	0.000553022	0.318935
7	557.591	9113.73	1.14522	0.00603368	0.00553374	0.631993	0.0478359	0.0011957	0.318976	7	454.818	3210.71	5.30103	0.00603368	0.00553374	0.632634	0.047886	0.000485595	0.318994
8	557.66	9118.09	1.14658	0.007034	0.00653384	0.632275	0.0478529	0.000856157	0.319016	8	454.818	3210.71	5.30103	0.007034	0.00653384	0.632475	0.0480067	0.00041404	0.319104
9	557.691	9120.09	1.14721	0.0073453	0.00718965	0.632405	0.0478608	0.000700292	0.319034	9	454.818	3210.71	5.30103	0.0073453	0.00718965	0.632118	0.0482413	0.000366355	0.319275
10	558.61	9178.96	1.16559	0.00834526	0.00784528	0.631589	0.0484766	0.000473087	0.319461	10	454.818	3210.71	5.30103	0.00834526	0.00784528	0.631526	0.04862	0.000319127	0.319535
11	559.755	9252.28	1.18849	0.00934525	0.00884526	0.630479	0.0492608	0.000278326	0.319982	11	454.818	3210.71	5.30103	0.00934525	0.00884526	0.630358	0.0493742	0.000248424	0.32002
12	560.947	9327.17	1.21233	0.0103453	0.00984526	0.629276	0.0501057	0.000155056	0.320463	12	454.818	3210.71	5.30103	0.0103453	0.00984526	0.629101	0.0502142	0.000181234	0.320504
13	562.197	9405.23	1.23733	0.0113453	0.0108453	0.627964	0.0510127	8.37518e-05	0.32094	13	454.818	3210.71	5.30103	0.0113453	0.0108453	0.627779	0.0511188	0.000118934	0.320983
14	563.518	9487.71	1.26375	0.0123453	0.0118453	0.626543	0.0519876	3.77236e-05	0.321431	14	454.818	3210.71	5.30103	0.0123453	0.0118453	0.626393	0.0520772	6.249e-05	0.321468
15	564.916	9575.02	1.29172	0.0133452	0.0128452	0.62501	0.0530378	1.2561e-05	0.321939	15	454.818	3210.71	5.30103	0.0133452	0.0128452	0.62501	0.0530378	1.2561e-05	0.321939

## Sheet: hiT-5_1
hiT-5_1: Primary										hiT-5_1: Diffused
Shell	temperature (｡C)	pressure (bar)	tot.time (my)	radius (cm)	X(node) (cm)	Xfe	Xmg	Xmn	Xca	Shell	temperature (｡C)	pressure (bar)	tot.time (my)	radius (cm)	X(node) (cm)	Xfe	Xmg	Xmn	Xca
1	521.315	5308.44	0	0.00212106	0.00106053	0.552597	0.039965	0.228452	0.178986	1	514.818	3210.71	60.8134	0.00212106	0.00106053	0.575996	0.04074	0.204406	0.178857
2	521.315	5308.45	4.6715e-05	0.00313827	0.00262966	0.552598	0.0399652	0.228451	0.178986	2	514.818	3210.71	60.8134	0.00313827	0.00262966	0.576102	0.0407447	0.204299	0.178854
3	521.315	5308.46	0.000130802	0.00402613	0.0035822	0.5526	0.0399654	0.228449	0.178986	3	514.818	3210.71	60.8134	0.00402613	0.0035822	0.576246	0.0407511	0.204153	0.17885
4	521.316	5308.48	0.000270947	0.00503148	0.0045288	0.552603	0.0399659	0.228446	0.178985	4	514.818	3210.71	60.8134	0.00503148	0.0045288	0.576436	0.0407596	0.203959	0.178845
5	521.317	5308.51	0.000485836	0.00600601	0.00551874	0.552608	0.0399665	0.228442	0.178984	5	514.818	3210.71	60.8134	0.00600601	0.00551874	0.576686	0.0407707	0.203706	0.178838
6	521.318	5308.55	0.000794155	0.00708972	0.00654786	0.552615	0.0399674	0.228435	0.178982	6	514.818	3210.71	60.8134	0.00708972	0.00654786	0.576997	0.0407847	0.203389	0.178828
7	521.321	5308.61	0.00125196	0.0081074	0.00759856	0.552625	0.0399689	0.228427	0.17898	7	514.818	3210.71	60.8134	0.0081074	0.00759856	0.57737	0.0408015	0.203011	0.178817
8	521.324	5308.68	0.0018032	0.00915049	0.00862895	0.552638	0.0399705	0.228415	0.178977	8	514.818	3210.71	60.8134	0.00915049	0.00862895	0.577788	0.0408206	0.202587	0.178805
9	521.327	5308.77	0.00250392	0.0101335	0.00964202	0.552653	0.0399727	0.228401	0.178973	9	514.818	3210.71	60.8134	0.0101335	0.00964202	0.57825	0.0408418	0.202118	0.17879
10	521.331	5308.88	0.00333545	0.0111426	0.0106381	0.552672	0.0399753	0.228384	0.178969	10	514.818	3210.71	60.8134	0.0111426	0.0106381	0.578754	0.0408652	0.201607	0.178774
11	521.336	5309.01	0.00435384	0.0121338	0.0116382	0.552694	0.0399784	0.228364	0.178964	11	514.818	3210.71	60.8134	0.0121338	0.0116382	0.579309	0.0408912	0.201044	0.178756
12	521.342	5309.17	0.0055404	0.0131278	0.0126308	0.55272	0.0399821	0.22834	0.178957	12	514.818	3210.71	60.8134	0.0131278	0.0126308	0.57991	0.0409196	0.200435	0.178735
13	521.349	5309.35	0.0069325	0.0141377	0.0136327	0.552752	0.0399863	0.228312	0.17895	13	514.818	3210.71	60.8134	0.0141377	0.0136327	0.580566	0.0409511	0.199771	0.178712
14	521.357	5309.56	0.00856753	0.0151383	0.014638	0.552788	0.0399914	0.228279	0.178942	14	514.818	3210.71	60.8134	0.0151383	0.014638	0.581274	0.0409855	0.199054	0.178686
15	521.367	5309.81	0.0104455	0.016143	0.0156407	0.552829	0.0399972	0.228241	0.178932	15	514.818	3210.71	60.8134	0.016143	0.0156407	0.582033	0.0410229	0.198287	0.178658
16	521.378	5310.09	0.0126224	0.0171431	0.0166431	0.552878	0.0400039	0.228198	0.178921	16	514.818	3210.71	60.8134	0.0171431	0.0166431	0.582842	0.0410634	0.197469	0.178626
17	521.39	5310.42	0.0151543	0.0181465	0.0176448	0.552934	0.0400116	0.228147	0.178908	17	514.818	3210.71	60.8134	0.0181465	0.0176448	0.583702	0.0411071	0.1966	0.178591
18	521.405	5310.81	0.0180787	0.0191492	0.0186479	0.552999	0.0400206	0.228088	0.178892	18	514.818	3210.71	60.8134	0.0191492	0.0186479	0.584615	0.0411543	0.195678	0.178553
19	521.422	5311.25	0.0214515	0.0201525	0.0196509	0.553074	0.040031	0.22802	0.178875	19	514.818	3210.71	60.8134	0.0201525	0.0196509	0.58558	0.0412052	0.194704	0.17851
20	521.441	5311.75	0.0253102	0.021153	0.0206528	0.55316	0.0400429	0.227942	0.178855	20	514.818	3210.71	60.8134	0.021153	0.0206528	0.586597	0.0412597	0.19368	0.178463
21	521.463	5312.32	0.029692	0.0221529	0.021653	0.553258	0.0400564	0.227854	0.178832	21	514.818	3210.71	60.8134	0.0221529	0.021653	0.587664	0.0413181	0.192606	0.178412
22	521.488	5312.97	0.0346532	0.0231512	0.022652	0.553368	0.0400717	0.227754	0.178806	22	514.818	3210.71	60.8134	0.0231512	0.022652	0.588782	0.0413806	0.191481	0.178356
23	521.516	5313.7	0.0402309	0.0241477	0.0236495	0.553492	0.0400889	0.227641	0.178778	23	514.818	3210.71	60.8134	0.0241477	0.0236495	0.589951	0.0414473	0.190306	0.178295
24	521.547	5314.52	0.0464814	0.0251501	0.0246489	0.553632	0.0401081	0.227515	0.178745	24	514.818	3210.71	60.8134	0.0251501	0.0246489	0.591174	0.0415188	0.189078	0.178228
25	521.582	5315.43	0.0534793	0.0261501	0.0256501	0.553787	0.0401297	0.227374	0.178709	25	514.818	3210.71	60.8134	0.0261501	0.0256501	0.592453	0.0415952	0.187797	0.178155
26	521.621	5316.44	0.0612247	0.0271506	0.0266503	0.553959	0.0401536	0.227218	0.178669	26	514.818	3210.71	60.8134	0.0271506	0.0266503	0.593782	0.0416767	0.186465	0.178076
27	521.663	5317.56	0.0697735	0.0281501	0.0276503	0.55415	0.04018	0.227045	0.178625	27	514.818	3210.71	60.8134	0.0281501	0.0276503	0.595164	0.0417636	0.185083	0.177989
28	521.71	5318.79	0.0791819	0.029149	0.0286495	0.554359	0.0402091	0.226856	0.178576	28	514.818	3210.71	60.8134	0.029149	0.0286495	0.596596	0.0418562	0.183652	0.177895
29	521.762	5320.15	0.089562	0.0301483	0.0296486	0.55459	0.0402412	0.226646	0.178522	29	514.818	3210.71	60.8134	0.0301483	0.0296486	0.59808	0.0419548	0.182172	0.177793
30	521.82	5321.65	0.101045	0.0311475	0.0306479	0.554846	0.0402767	0.226414	0.178463	30	514.818	3210.71	60.8134	0.0311475	0.0306479	0.599616	0.0420598	0.180642	0.177682
31	521.883	5323.31	0.11376	0.0321461	0.0316468	0.55513	0.0403161	0.226157	0.178397	31	514.818	3210.71	60.8134	0.0321461	0.0316468	0.601202	0.0421715	0.179065	0.177562
32	521.954	5325.15	0.127859	0.0331476	0.0326469	0.555444	0.0403597	0.225871	0.178324	32	514.818	3210.71	60.8134	0.0331476	0.0326469	0.60284	0.0422905	0.177438	0.177431
33	522.032	5327.19	0.143508	0.0341476	0.0336476	0.555793	0.0404083	0.225555	0.178244	33	514.818	3210.71	60.8134	0.0341476	0.0336476	0.604528	0.0424172	0.175764	0.17729
34	522.118	5329.45	0.160784	0.0351484	0.034648	0.556178	0.0404619	0.225206	0.178155	34	514.818	3210.71	60.8134	0.0351484	0.034648	0.606265	0.0425519	0.174045	0.177138
35	522.214	5331.94	0.179834	0.0361484	0.0356484	0.556603	0.0405212	0.22482	0.178056	35	514.818	3210.71	60.8134	0.0361484	0.0356484	0.60805	0.0426951	0.172281	0.176974
36	522.318	5334.68	0.200772	0.0371471	0.0366477	0.55707	0.0405863	0.224395	0.177949	36	514.818	3210.71	60.8134	0.0371471	0.0366477	0.60988	0.0428472	0.170476	0.176796
37	522.433	5337.68	0.223765	0.0381475	0.0376473	0.557583	0.040658	0.223928	0.17783	37	514.818	3210.71	60.8134	0.0381475	0.0376473	0.611757	0.0430088	0.168629	0.176606
38	522.559	5340.97	0.248925	0.0391476	0.0386476	0.558145	0.0407366	0.223417	0.177701	38	514.818	3210.71	60.8134	0.0391476	0.0386476	0.61368	0.0431806	0.16674	0.1764
39	522.696	5344.56	0.276385	0.0401476	0.0396476	0.558758	0.0408225	0.222859	0.17756	39	514.818	3210.71	60.8134	0.0401476	0.0396476	0.615645	0.0433631	0.164812	0.176179
40	522.846	5348.46	0.306254	0.0411474	0.0406475	0.559426	0.0409161	0.222251	0.177407	40	514.818	3210.71	60.8134	0.0411474	0.0406475	0.617653	0.0435568	0.162847	0.175943
41	523.008	5352.69	0.338665	0.0421473	0.0416474	0.560151	0.0410178	0.221591	0.17724	41	514.818	3210.71	60.8134	0.0421473	0.0416474	0.619702	0.0437624	0.160847	0.175689
42	523.183	5357.27	0.373729	0.0431469	0.0426471	0.560935	0.0411282	0.220875	0.177061	42	514.818	3210.71	60.8134	0.0431469	0.0426471	0.621789	0.0439807	0.158813	0.175417
43	523.372	5362.21	0.41154	0.0441449	0.0436459	0.561782	0.0412475	0.220103	0.176868	43	514.818	3210.71	60.8134	0.0441449	0.0436459	0.623912	0.0442119	0.156749	0.175127
44	523.577	5367.57	0.452528	0.045145	0.044645	0.5627	0.0413771	0.219264	0.176659	44	514.818	3210.71	60.8134	0.045145	0.044645	0.626071	0.0444572	0.154655	0.174817
45	523.8	5373.39	0.497047	0.0461448	0.0456449	0.563698	0.0415183	0.218352	0.176432	45	514.818	3210.71	60.8134	0.0461448	0.0456449	0.628266	0.0447174	0.15253	0.174486
46	524.042	5379.72	0.545491	0.047145	0.0466449	0.564785	0.0416724	0.217357	0.176185	46	514.818	3210.71	60.8134	0.047145	0.0466449	0.630494	0.0449932	0.150379	0.174134
47	524.306	5386.61	0.598251	0.048145	0.047645	0.565969	0.0418408	0.216272	0.175918	47	514.818	3210.71	60.8134	0.048145	0.047645	0.632752	0.0452852	0.148204	0.173759
48	524.593	5394.12	0.655701	0.0491449	0.048645	0.56726	0.0420248	0.215088	0.175626	48	514.818	3210.71	60.8134	0.0491449	0.048645	0.635038	0.0455943	0.146007	0.173361
49	524.906	5402.28	0.718215	0.050145	0.049645	0.568666	0.0422259	0.213797	0.17531	49	514.818	3210.71	60.8134	0.050145	0.049645	0.637349	0.0459213	0.14379	0.17294
50	525.245	5411.16	0.786129	0.0511448	0.0506449	0.570196	0.0424452	0.212391	0.174968	50	514.818	3210.71	60.8134	0.0511448	0.0506449	0.639684	0.0462669	0.141555	0.172493
51	525.614	5420.78	0.859799	0.0521447	0.0516448	0.571856	0.0426843	0.210862	0.174597	51	514.818	3210.71	60.8134	0.0521447	0.0516448	0.642041	0.046632	0.139305	0.172022
52	526.012	5431.2	0.93956	0.0531449	0.0526448	0.573656	0.0429444	0.209202	0.174197	52	514.818	3210.71	60.8134	0.0531449	0.0526448	0.644417	0.0470174	0.137042	0.171524
53	526.443	5442.46	1.02569	0.0541449	0.0536449	0.575602	0.0432268	0.207405	0.173767	53	514.818	3210.71	60.8134	0.0541449	0.0536449	0.646809	0.0474239	0.134766	0.171
54	526.907	5454.58	1.11848	0.0551449	0.0546449	0.577701	0.0435329	0.205462	0.173304	54	514.818	3210.71	60.8134	0.0551449	0.0546449	0.649216	0.0478522	0.132482	0.170449
55	527.405	5467.61	1.21818	0.0561448	0.0556448	0.579959	0.0438638	0.203368	0.172809	55	514.818	3210.71	60.8134	0.0561448	0.0556448	0.651634	0.0483032	0.130191	0.169871
56	527.94	5481.57	1.32503	0.0571449	0.0566448	0.582383	0.044221	0.201115	0.172281	56	514.818	3210.71	60.8134	0.0571449	0.0566448	0.654061	0.0487776	0.127896	0.169265
57	528.511	5496.49	1.43923	0.0581449	0.0576449	0.584978	0.0446054	0.198699	0.171718	57	514.818	3210.71	60.8134	0.0581449	0.0576449	0.656495	0.049276	0.125597	0.168632
58	529.119	5512.39	1.56094	0.0591443	0.0586446	0.587747	0.0450183	0.196114	0.171121	58	514.818	3210.71	60.8134	0.0591443	0.0586446	0.658932	0.0497989	0.123299	0.167971
59	529.768	5529.33	1.69063	0.0601442	0.0596443	0.590703	0.045462	0.193348	0.170488	59	514.818	3210.71	60.8134	0.0601442	0.0596443	0.661369	0.0503472	0.121001	0.167282
60	530.458	5547.38	1.82873	0.0611442	0.0606442	0.593855	0.0459387	0.19039	0.169816	60	514.818	3210.71	60.8134	0.0611442	0.0606442	0.663806	0.0509215	0.118707	0.166566
61	531.193	5566.57	1.97563	0.0621442	0.0616442	0.597214	0.0464505	0.187229	0.169106	61	514.818	3210.71	60.8134	0.0621442	0.0616442	0.666238	0.0515223	0.116417	0.165823
62	531.973	5586.95	2.13165	0.0631442	0.0626442	0.600788	0.0469995	0.183857	0.168356	62	514.818	3210.71	60.8134	0.0631442	0.0626442	0.668663	0.0521498	0.114135	0.165053
63	532.8	5608.56	2.29705	0.0641442	0.0636442	0.604583	0.0475879	0.180264	0.167565	63	514.818	3210.71	60.8134	0.0641442	0.0636442	0.671077	0.0528046	0.111861	0.164257
64	533.675	5631.43	2.47205	0.0651442	0.0646442	0.608605	0.0482175	0.176444	0.166733	64	514.818	3210.71	60.8134	0.0651442	0.0646442	0.673479	0.0534869	0.109597	0.163436
65	534.598	5655.56	2.65674	0.0661443	0.0656443	0.612857	0.0488899	0.172393	0.16586	65	514.818	3210.71	60.8134	0.0661443	0.0656443	0.675866	0.054197	0.107346	0.162591
66	535.57	5680.96	2.85112	0.0671444	0.0666443	0.617339	0.0496067	0.168106	0.164948	66	514.818	3210.71	60.8134	0.0671444	0.0666443	0.678233	0.0549351	0.105108	0.161723
67	536.59	5707.61	3.05512	0.0681443	0.0676444	0.62205	0.0503691	0.163584	0.163997	67	514.818	3210.71	60.8134	0.0681443	0.0676444	0.68058	0.055701	0.102886	0.160833
68	537.657	5735.5	3.26856	0.0691444	0.0686444	0.626985	0.0511781	0.158828	0.163009	68	514.818	3210.71	60.8134	0.0691444	0.0686444	0.682902	0.0564949	0.100679	0.159923
69	538.77	5764.58	3.49116	0.0701443	0.0696443	0.632137	0.0520343	0.153843	0.161986	69	514.818	3210.71	60.8134	0.0701443	0.0696443	0.685198	0.0573167	0.0984911	0.158994
70	539.927	5794.81	3.72254	0.0711442	0.0706443	0.637498	0.0529383	0.148634	0.16093	70	514.818	3210.71	60.8134	0.0711442	0.0706443	0.687464	0.0581663	0.0963219	0.158048
71	541.126	5826.13	3.96222	0.0721442	0.0716442	0.643054	0.0538899	0.143212	0.159845	71	514.818	3210.71	60.8134	0.0721442	0.0716442	0.689697	0.0590435	0.0941729	0.157086
72	542.362	5858.45	4.20959	0.0731442	0.0726442	0.648789	0.0548888	0.137589	0.158733	72	514.818	3210.71	60.8134	0.0731442	0.0726442	0.691896	0.059948	0.092045	0.156111
73	543.634	5891.68	4.46397	0.074144	0.0736441	0.654684	0.0559341	0.131783	0.157598	73	514.818	3210.71	60.8134	0.074144	0.0736441	0.694057	0.0608795	0.0899395	0.155124
74	544.938	5925.76	4.72478	0.075144	0.074644	0.660723	0.0570256	0.125807	0.156444	74	514.818	3210.71	60.8134	0.075144	0.074644	0.696177	0.0618378	0.0878572	0.154128
75	546.271	5960.59	4.99136	0.076144	0.075644	0.666886	0.0581625	0.119679	0.155273	75	514.818	3210.71	60.8134	0.076144	0.075644	0.698254	0.0628224	0.0857986	0.153125
76	547.629	5996.07	5.26294	0.077144	0.076644	0.673148	0.0593436	0.113421	0.154088	76	514.818	3210.71	60.8134	0.077144	0.076644	0.700286	0.0638331	0.0837646	0.152117
77	549.008	6032.09	5.5386	0.0781441	0.077644	0.679483	0.060567	0.107057	0.152894	77	514.818	3210.71	60.8134	0.0781441	0.077644	0.702269	0.0648694	0.0817559	0.151106
78	550.401	6068.51	5.81735	0.0791441	0.0786441	0.685858	0.0618302	0.100617	0.151694	78	514.818	3210.71	60.8134	0.0791441	0.0786441	0.7042	0.065931	0.0797732	0.150096
79	551.805	6105.19	6.09808	0.0801441	0.0796441	0.692241	0.0631302	0.0941356	0.150493	79	514.818	3210.71	60.8134	0.0801441	0.0796441	0.706077	0.0670174	0.0778169	0.149089
80	553.213	6141.97	6.37961	0.0811441	0.0806441	0.698593	0.0644634	0.0876481	0.149295	80	514.818	3210.71	60.8134	0.0811441	0.0806441	0.707897	0.0681284	0.0758875	0.148087
81	554.618	6178.7	6.66075	0.082144	0.081644	0.704877	0.0658257	0.0811934	0.148104	81	514.818	3210.71	60.8134	0.082144	0.081644	0.709657	0.0692636	0.0739853	0.147094
82	556.016	6215.22	6.94029	0.083144	0.082644	0.71105	0.0672127	0.0748121	0.146925	82	514.818	3210.71	60.8134	0.083144	0.082644	0.711354	0.070423	0.0721107	0.146112
83	557.4	6251.38	7.21702	0.084144	0.083644	0.717075	0.0686199	0.0685453	0.14576	83	514.818	3210.71	60.8134	0.084144	0.083644	0.712985	0.0716063	0.0702636	0.145145
84	558.764	6287.02	7.4898	0.085144	0.084644	0.72291	0.0700426	0.0624339	0.144613	84	514.818	3210.71	60.8134	0.085144	0.084644	0.714546	0.0728135	0.0684444	0.144196
85	560.102	6322	7.75756	0.086144	0.085644	0.728518	0.0714762	0.0565182	0.143487	85	514.818	3210.71	60.8134	0.086144	0.085644	0.716035	0.0740447	0.066653	0.143268
86	561.411	6356.21	8.01936	0.087144	0.086644	0.733864	0.0729162	0.0508355	0.142385	86	514.818	3210.71	60.8134	0.087144	0.086644	0.717447	0.0752998	0.0648897	0.142364
87	562.687	6389.53	8.2744	0.088144	0.087644	0.738915	0.0743588	0.0454198	0.141307	87	514.818	3210.71	60.8134	0.088144	0.087644	0.718779	0.0765792	0.0631542	0.141488
88	563.925	6421.89	8.52205	0.089144	0.088644	0.743644	0.0758009	0.0403006	0.140254	88	514.818	3210.71	60.8134	0.089144	0.088644	0.720027	0.0778832	0.0614466	0.140643
89	565.124	6453.23	8.76197	0.0901439	0.0896439	0.748031	0.0772405	0.0355008	0.139227	89	514.818	3210.71	60.8134	0.0901439	0.0896439	0.721188	0.0792121	0.0597667	0.139834
90	566.285	6483.55	8.99401	0.091144	0.0906439	0.75206	0.0786766	0.0310379	0.138225	90	514.818	3210.71	60.8134	0.091144	0.0906439	0.722256	0.0805669	0.0581143	0.139062
91	567.405	6512.84	9.21817	0.0921439	0.0916439	0.75572	0.0801092	0.0269243	0.137247	91	514.818	3210.71	60.8134	0.0921439	0.0916439	0.723229	0.0819483	0.0564891	0.138333
92	568.488	6541.13	9.4347	0.0931439	0.0926439	0.759005	0.0815394	0.0231665	0.136289	92	514.818	3210.71	60.8134	0.0931439	0.0926439	0.724102	0.0833572	0.054891	0.13765
93	569.535	6568.48	9.64401	0.0941439	0.0936439	0.761914	0.0829695	0.019765	0.135351	93	514.818	3210.71	60.8134	0.0941439	0.0936439	0.72487	0.0847949	0.0533196	0.137015
94	570.548	6594.96	9.8467	0.0951438	0.0946439	0.764452	0.0844029	0.0167153	0.13443	94	514.818	3210.71	60.8134	0.0951438	0.0946439	0.72553	0.086263	0.0517746	0.136432
95	571.532	6620.68	10.0436	0.0961438	0.0956438	0.766627	0.0858442	0.014007	0.133522	95	514.818	3210.71	60.8134	0.0961438	0.0956438	0.726077	0.0877632	0.0502557	0.135904
96	572.492	6645.76	10.2355	0.0971438	0.0966438	0.768452	0.0872992	0.0116257	0.132623	96	514.818	3210.71	60.8134	0.0971438	0.0966438	0.726507	0.0892978	0.0487624	0.135433
97	573.433	6670.34	10.4237	0.0981439	0.0976439	0.769941	0.0887748	0.00955299	0.131731	97	514.818	3210.71	60.8134	0.0981439	0.0976439	0.726817	0.0908694	0.0472943	0.13502
98	574.36	6694.58	10.6091	0.0991439	0.0986439	0.771111	0.0902788	0.00776738	0.130843	98	514.818	3210.71	60.8134	0.0991439	0.0986439	0.727002	0.092481	0.0458512	0.134666
99	575.281	6718.62	10.7932	0.100144	0.0996439	0.771982	0.0918199	0.00624511	0.129953	99	514.818	3210.71	60.8134	0.100144	0.0996439	0.727059	0.0941359	0.0444325	0.134372
100	576.078	6739.45	10.9526	0.100966	0.100555	0.77252	0.0931916	0.00510382	0.129185	100	514.818	3210.71	60.8134	0.100966	0.100555	0.726998	0.0956848	0.0431612	0.134156
101	576.866	6760.06	11.1103	0.101966	0.101466	0.772274	0.0945928	0.00405966	0.129074	101	514.818	3210.71	60.8134	0.101966	0.101466	0.726828	0.0972765	0.0419096	0.133986
102	577.702	6781.91	11.2776	0.102966	0.102466	0.771792	0.0961175	0.00315014	0.128941	102	514.818	3210.71	60.8134	0.102966	0.102466	0.726513	0.0990776	0.040558	0.133851
103	578.558	6804.27	11.4487	0.103966	0.103466	0.771092	0.097716	0.00240236	0.12879	103	514.818	3210.71	60.8134	0.103966	0.103466	0.726064	0.100941	0.0392294	0.133766
104	579.44	6827.31	11.6251	0.104966	0.104466	0.770184	0.0993995	0.00179591	0.12862	104	514.818	3210.71	60.8134	0.104966	0.104466	0.725481	0.102873	0.0379234	0.133723
105	580.354	6851.2	11.8079	0.105966	0.105466	0.769079	0.101181	0.00130896	0.128432	105	514.818	3210.71	60.8134	0.105966	0.105466	0.724765	0.104881	0.0366396	0.133715
106	581.307	6876.11	11.9985	0.106966	0.106466	0.767783	0.103073	0.00092161	0.128223	106	514.818	3210.71	60.8134	0.106966	0.106466	0.723918	0.106973	0.0353777	0.133731
107	582.307	6902.22	12.1984	0.107966	0.107466	0.766301	0.105091	0.000615891	0.127991	107	514.818	3210.71	60.8134	0.107966	0.107466	0.722945	0.109157	0.0341373	0.133761
108	583.359	6929.72	12.4089	0.108966	0.108466	0.764636	0.107252	0.00037601	0.127736	108	514.818	3210.71	60.8134	0.108966	0.108466	0.721849	0.111442	0.0329181	0.133791
109	584.218	6976.36	12.5808	0.109966	0.109466	0.761939	0.109012	0.000170156	0.128879	109	514.818	3210.71	60.8134	0.109966	0.109466	0.720637	0.113839	0.0317199	0.133804
110	585.05	7029.63	12.7471	0.110966	0.110466	0.758749	0.110735	7.03773e-05	0.130445	110	514.818	3210.71	60.8134	0.110966	0.110466	0.719318	0.116357	0.0305423	0.133783
111	585.714	7072.13	12.8799	0.111966	0.111466	0.756119	0.112128	5.37296e-05	0.131699	111	514.818	3210.71	60.8134	0.111966	0.111466	0.717899	0.119007	0.0293851	0.133708
112	586.413	7116.94	13.0198	0.112966	0.112466	0.753325	0.113607	4.0568e-05	0.133027	112	514.818	3210.71	60.8134	0.112966	0.112466	0.716393	0.1218	0.0282479	0.13356
113	587.152	7164.21	13.1674	0.113966	0.113466	0.750357	0.115178	3.0297e-05	0.134434	113	514.818	3210.71	60.8134	0.113966	0.113466	0.71481	0.124745	0.0271307	0.133315
114	587.93	7214.09	13.3232	0.114966	0.114466	0.747204	0.116848	2.2363e-05	0.135926	114	514.818	3210.71	60.8134	0.114966	0.114466	0.713164	0.127852	0.0260331	0.13295
115	588.434	7246.32	13.4238	0.115583	0.115274	0.745155	0.117934	1.82201e-05	0.136894	115	514.818	3210.71	60.8134	0.115583	0.115274	0.711798	0.130492	0.0251597	0.132551
116	590.567	7382.95	13.8505	0.116583	0.116083	0.741787	0.119753	1.31089e-05	0.138447	116	514.818	3210.71	60.8134	0.116583	0.116083	0.710407	0.133249	0.0242987	0.132045
117	592.809	7526.55	14.2989	0.117583	0.117083	0.738237	0.12173	9.32048e-06	0.140024	117	514.818	3210.71	60.8134	0.117583	0.117083	0.708664	0.136828	0.0232513	0.131256
118	595.167	7677.56	14.7705	0.118583	0.118083	0.734491	0.123881	6.55555e-06	0.141622	118	514.818	3210.71	60.8134	0.118583	0.118083	0.706913	0.140601	0.0222225	0.130263
119	597.649	7836.49	15.2668	0.119583	0.119083	0.730535	0.126225	4.5721e-06	0.143235	119	514.818	3210.71	60.8134	0.119583	0.119083	0.705169	0.144573	0.0212122	0.129045
120	600.262	8003.88	15.7895	0.120583	0.120083	0.726355	0.128783	3.16756e-06	0.14486	120	514.818	3210.71	60.8134	0.120583	0.120083	0.703447	0.148749	0.0202201	0.127584
121	634.654	9979.59	22.6678	0.132683	0.126633	0.691189	0.171388	9.88049e-07	0.137422	121	514.818	3210.71	60.8134	0.132683	0.126633	0.693073	0.181176	0.0141629	0.111588
122	645.107	10123.6	24.7575	0.133971	0.133327	0.689331	0.194075	3.89404e-06	0.116591	122	514.818	3210.71	60.8134	0.133971	0.133327	0.687121	0.221595	0.0086286	0.0826554
123	664.968	9753.5	28.7307	0.13467	0.13432	0.693736	0.228852	1.6382e-05	0.0773953	123	514.818	3210.71	60.8134	0.13467	0.13432	0.686344	0.227422	0.00785295	0.0783814
124	665.298	9733.96	28.7966	0.13467	0.13467	0.686074	0.229455	0.00758267	0.0768884	124	514.818	3210.71	60.8134	0.13467	0.13467	0.686074	0.229455	0.00758267	0.0768884

[truncated: 7 more sheets: hiT-5_4, hiT-5_6, hiT-5_8, hiT-50_1, hiT-50_4, hiT-50_6, hiT-50_8]
