# Supplementary material
Source: MDPI journal article supplement (https://www.mdpi.com/2076-3263/11/12/505)
Supplement: s1 [file s1 › S3_Allinfomaster.xlsx]

## Sheet: Info and Key
This spreadsheet contains output data from Theriak-Domino, generated during garnet P-T path calculations.
Each tab is sample specific. Below is a key for each column within these tabs:
No.	Column A	point number 1 through n, where 1 = core and the final value is the rim conditions
T(C)	Column B	Calculated temperature (T) reported in oC
P(bars)	Column C	Calculated pressure (P) reported in bars
Xalm	Column D	Modeled mole fraction almandine (Xalm) calculated by Theriak-Domino
Xprp	Column E	Modeled mole fraction pyrope (Xprp) calculated by Theriak-Domino
Xsps	Column F	Modeled mole fraction spessartine (Xsps) calculated by Theriak-Domino
Xgrs	Column G	Modeled mole fraction grossular (Xgrs) calculated by Theriak-Domino
Mg#	Column H	Modeled Magnesium number (Mg#) calculated by Theriak-Domino
Fe#	Column I	Modeled Iron number (Fe#) calculated by Theriak-Domino
obs_Xalm	Column J	Observed mole fraction of almandine (Xprp) at point n along the EPMA core-rim transect. See TD input for raw data and smoothed data (when applicable)
obs_Xprp	Column K	Observed mole fraction of pyrope (Xprp) at point n along the EPMA core-rim transect. See TD input for raw data and smoothed data (when applicable)
obs_Xsps	Column L	Observed mole fraction of spessartine (Xsps) at point n along the EPMA core-rim transect. See TD input for raw data and smoothed data (when applicable)
obs_Xgrs	Column M	Observed mole fraction of spessartine (Xsps) at point n along the EPMA core-rim transect. See TD input for raw data and smoothed data (when applicable)
obs_Mg#	Column N	Observed magnesium number (Mg#) at point n along the EPMA core-rim transect. See S## for raw data and smoothed data (when applicable)
obs_Fe#	Column O	Observed iron number (Fe#) at point n along the EPMA core-rim transect. See TD input for raw data and smoothed data (when applicable)
blk_Si	Column P	Bulk rock silica montent in mole %. Note, at n = 1 the value reported is that which has been determined analytically; all remaining values are effective bulk compositional values calculated by Theriak-Domino as garnet grows
blk_Al	Column Q	Bulk rock aluminum content in mole %. Note, at n = 1 the value reported is that which has been determined analytically; all remaining values are effective values calculated by Theriak-Domino as garnet grows
blk_Fe	Column R	Bulk rock Fe content in mole %. Note, at n = 1 the value reported is that which has been determined analytically; all remaining values are effective bulk compositional values calculated by Theriak-Domino as garnet grows
blk_Mg	Column S	Bulk rock Fe content in mole %. Note, at n = 1 the value reported is that which has been determined analytically; all remaining values are effective bulk compositional values calculated by Theriak-Domino as garnet grows
blk_Mn	Column T	Bulk rock manganese ontent in mole %. Note, at n = 1 the value reported is that which has been determined analytically; all remaining values are effective bulk compositional values calculated by Theriak-Domino as garnet grows
blk_Ca	Column U	Bulk rock calcium montent in mole %. Note, at n = 1 the value reported is that which has been determined analytically; all remaining values are effective bulk compostional values calculated by Theriak-Domino as garnet grows
blk_Na	Column V	Bulk rock sodium content in mole %. Note, at n = 1 the value reported is that which has been determined analytically; all remaining values are effective bulk compositional values calculated by Theriak-Domino as garnet grows
blk_K	Column W	Bulk rock potassium content in mole %. Note, at n = 1 the value reported is that which has been determined analytically; all remaining values are effective bulk compositional values calculated by Theriak-Domino as garnet grows
blk_Ti	Column X	Bulk rock titanium content in mole %. Note, at n = 1 the value reported is that which has been determined analytically; all remaining values are effective bulk compositional values calculated by Theriak-Domino as garnet grows
Tabs BR_21 are for samples BR_21
Tabs ET45_## are for sample ET45
Tabs B5_## are for Gaidies et al. (2008) Path B; p = primary garnet composition, d = diffused garnet compositions
Tabs B50_## are for Gaides et al. (2008) Path B with a heating/cooling rate of 50oC/my; p = primary garnet composition, d = diffused garnet compositions
Tabs HT5_## are for hiT Path with a heating/cooling rate of 5oC/my; p = primary garnet composition, d = diffused garnet compositions
Tabs HT50_## are for hiT Path with a heating/cooling rate of 50oC/my; p = primary garnet composition, d = diffused garnet compositions
**Note: The final effective bulk composition for each sample is the last row of data within each tab, columns P-Y.
Feldspar (Baldwmin et al., 2005; Holland and Powell, 2003)
Garnet (White et al., 2005; Zeh and Holness, 2003)
Biotite (Powell and Holland, 1999; White et al., 2000)
White Mica (Coggon and Holland, 2002)
Illmenite (Ideal Mn-Mg-Fe solution - no reference is provided...)
Chlorite (Holland et al., 1998; with WAfChl-Dph = 14.5 kJ and WDph-Ame = 13.5 kJ as in THERMOCALC)
Staurolite (Holland and Powell, 1998; Mahar et al., 1997 with WMbSt-FeSt = -8 kJ as in THERMOCALC)
Chloritoid (White et al., 2000; Mahar et al., 1997)

## Sheet: BR21_1
No.	T(C)	P(bars)	mod_Xalm	mod_Xprp	mod_Xsps	mod_Xgrs	mod_Mg#	mod_Fe#	obs_Xalm	obs_Xprp	obs_Xsps	obs_Xgrs	obs_Mg#	obs_Fe#	blk_Si	blk_Al	blk_Fe	blk_Mg	blk_Mn	blk_Ca	blk_Na	blk_K	blk_Ti	blk_H
1	680	7189.52	0.7574	0.0688	0.1043	0.0696	0.0833	0.9167	0.7714	0.093	0.0711	0.0646	0.1076	0.8924	78.203	10.198	3.022	1.183	0.034	0.819	3.828	2.383	0.29	100
2	680.1	7218.5	0.7581	0.0688	0.103	0.0701	0.0832	0.9168	0.7727	0.0961	0.0701	0.0611	0.1106	0.8894	78.0641	10.1054	2.9168	1.1734	0.0195	0.8093	3.828	2.383	0.29	100
3	680.2	7223.19	0.7584	0.0688	0.1026	0.0702	0.0832	0.9168	0.7748	0.096	0.0696	0.0597	0.1102	0.8898	78.0627	10.1045	2.9157	1.1733	0.0194	0.8092	3.828	2.383	0.29	100
4	680.3	7270.3	0.7594	0.0687	0.1007	0.0712	0.083	0.917	0.7768	0.0959	0.0683	0.0589	0.1099	0.8901	78.0602	10.1029	2.9138	1.1731	0.0191	0.809	3.828	2.383	0.29	100
5	680.4	7281.74	0.7598	0.0688	0.1001	0.0714	0.083	0.917	0.7769	0.0958	0.0676	0.0597	0.1098	0.8902	78.058	10.1015	2.9122	1.173	0.0189	0.8088	3.828	2.383	0.29	100
6	680.5	7365.22	0.7616	0.0686	0.0966	0.0732	0.0827	0.9173	0.7763	0.0957	0.0669	0.0612	0.1097	0.8903	78.0539	10.0988	2.9091	1.1727	0.0185	0.8085	3.828	2.383	0.29	100
7	680.6	7454.8	0.7634	0.0684	0.093	0.0752	0.0823	0.9177	0.775	0.0956	0.066	0.0634	0.1098	0.8902	78.0467	10.094	2.9037	1.1722	0.0178	0.808	3.828	2.383	0.29	100
8	680.7	7536.65	0.765	0.0683	0.0896	0.0771	0.0819	0.9181	0.773	0.0955	0.0651	0.0664	0.11	0.89	78.0395	10.0892	2.8982	1.1717	0.0171	0.8075	3.828	2.383	0.29	100
9	680.8	7550.92	0.7654	0.0683	0.0889	0.0774	0.0819	0.9181	0.7701	0.0963	0.0647	0.0689	0.1111	0.8889	78.0355	10.0865	2.8952	1.1714	0.0167	0.8072	3.828	2.383	0.29	100
10	680.9	7691.09	0.768	0.068	0.0832	0.0808	0.0813	0.9187	0.7671	0.0961	0.0636	0.0733	0.1113	0.8887	78.0289	10.0821	2.8901	1.1709	0.0161	0.8067	3.828	2.383	0.29	100
11	681	7871.47	0.7709	0.0675	0.0761	0.0855	0.0805	0.9195	0.7623	0.0958	0.0625	0.0795	0.1116	0.8884	78.0141	10.0723	2.8788	1.1699	0.0149	0.8055	3.828	2.383	0.29	100
12	681.1	8027.04	0.7731	0.0671	0.07	0.0898	0.0799	0.9201	0.7588	0.0949	0.0612	0.0852	0.1112	0.8888	77.9973	10.0611	2.8659	1.1688	0.0136	0.804	3.828	2.383	0.29	100
13	681.2	8204.45	0.7753	0.0666	0.0632	0.0949	0.0791	0.9209	0.7538	0.0936	0.0602	0.0925	0.1105	0.8895	77.9798	10.0494	2.8524	1.1676	0.0124	0.8024	3.828	2.383	0.29	100
14	681.3	8385.55	0.7769	0.066	0.0565	0.1006	0.0783	0.9217	0.7485	0.0928	0.0585	0.1002	0.1103	0.8897	77.9592	10.0357	2.8365	1.1662	0.0111	0.8004	3.828	2.383	0.29	100
15	681.4	8582.05	0.7781	0.0653	0.0494	0.1072	0.0775	0.9225	0.7431	0.0916	0.0562	0.1091	0.1097	0.8903	77.936	10.0202	2.8184	1.1647	0.0098	0.798	3.828	2.383	0.29	100
16	681.5	8671.93	0.7785	0.065	0.0462	0.1103	0.0771	0.9229	0.7398	0.0911	0.0554	0.1138	0.1096	0.8904	77.9171	10.0076	2.8037	1.1635	0.0089	0.796	3.828	2.383	0.29	100
17	681.6	8756.71	0.7785	0.0647	0.0434	0.1133	0.0767	0.9233	0.7366	0.0906	0.0545	0.1184	0.1095	0.8905	77.9046	9.9993	2.794	1.1627	0.0083	0.7946	3.828	2.383	0.29	100
18	681.7	8929.21	0.7782	0.064	0.0378	0.12	0.076	0.924	0.7304	0.0895	0.0521	0.128	0.1092	0.8908	77.8859	9.9868	2.7794	1.1615	0.0075	0.7924	3.828	2.383	0.29	100
19	681.8	9056.82	0.7776	0.0635	0.0338	0.1251	0.0755	0.9245	0.724	0.0884	0.0496	0.138	0.1088	0.8912	77.8625	9.9712	2.7612	1.16	0.0066	0.7896	3.828	2.383	0.29	100
20	681.9	9188.92	0.7765	0.0629	0.0299	0.1307	0.0749	0.9251	0.7174	0.0873	0.0468	0.1486	0.1085	0.8915	77.8412	9.957	2.7447	1.1587	0.0059	0.7869	3.828	2.383	0.29	100
21	682	9316.79	0.7748	0.0622	0.0265	0.1365	0.0744	0.9256	0.7105	0.0861	0.0438	0.1597	0.1081	0.8919	77.8181	9.9416	2.7268	1.1573	0.0052	0.7839	3.828	2.383	0.29	100
22	682.1	9443.23	0.7728	0.0616	0.0232	0.1425	0.0738	0.9262	0.7033	0.0849	0.0406	0.1712	0.1077	0.8923	77.7945	9.9259	2.7085	1.1558	0.0046	0.7806	3.828	2.383	0.29	100
23	682.2	9566.53	0.7702	0.0609	0.0203	0.1486	0.0733	0.9267	0.6958	0.0837	0.0372	0.1833	0.1074	0.8926	77.7694	9.9092	2.6891	1.1543	0.004	0.777	3.828	2.383	0.29	100
24	682.3	9690.3	0.7673	0.0602	0.0175	0.155	0.0728	0.9272	0.6881	0.0825	0.0336	0.1958	0.1071	0.8929	77.7436	9.892	2.6693	1.1527	0.0035	0.7731	3.828	2.383	0.29	100

## Sheet: BR21_2
No.	T(C)	P(bars)	mod_Xalm	mod_Xprp	mod_Xsps	mod_Xgrs	mod_Mg#	mod_Fe#	mod_V-Grt	obs_Xalm	obs_Xprp	obs_Xsps	obs_Xgrs	obs_Mg#	obs_Fe#	blk_Si	blk_Al	blk_Fe	blk_Mg	blk_Mn	blk_Ca	blk_Na	blk_K	blk_Ti	blk_H
1	680	7195.4	0.7575	0.0688	0.1041	0.0697	0.0832	0.9168	5.405	0.7714	0.093	0.0711	0.0646	0.1076	0.8924	78.203	10.198	3.022	1.183	0.034	0.819	3.828	2.383	0.29	100
2	680.1	7218.95	0.7581	0.0688	0.103	0.0702	0.0832	0.9168	0.0388	0.774	0.0938	0.0709	0.0614	0.1081	0.8919	78.0637	10.1051	2.9165	1.1734	0.0195	0.8093	3.828	2.383	0.29	100
3	680.2	7231.37	0.7584	0.0688	0.1024	0.0704	0.0832	0.9168	0.0228	0.7757	0.0944	0.0704	0.0596	0.1085	0.8915	78.0621	10.1041	2.9153	1.1733	0.0193	0.8092	3.828	2.383	0.29	100
4	680.3	7291.47	0.7598	0.0687	0.0998	0.0716	0.0829	0.9171	0.0944	0.7764	0.0948	0.0699	0.059	0.1088	0.8912	78.0594	10.1023	2.9132	1.1731	0.019	0.809	3.828	2.383	0.29	100
5	680.4	7296.82	0.7601	0.0687	0.0995	0.0717	0.0829	0.9171	0.0127	0.7763	0.095	0.0691	0.0596	0.109	0.891	78.0568	10.1006	2.9112	1.1729	0.0187	0.8088	3.828	2.383	0.29	100
6	680.5	7357.25	0.7615	0.0686	0.0969	0.073	0.0827	0.9173	0.0975	0.7752	0.0951	0.0681	0.0616	0.1093	0.8907	78.0543	10.0989	2.9093	1.1727	0.0185	0.8086	3.828	2.383	0.29	100
7	680.6	7418.39	0.7627	0.0685	0.0944	0.0744	0.0824	0.9176	0.1009	0.7741	0.0951	0.0676	0.0632	0.1094	0.8906	78.0489	10.0953	2.9052	1.1723	0.018	0.8082	3.828	2.383	0.29	100
8	680.7	7536.65	0.7649	0.0683	0.0897	0.0771	0.0819	0.9181	0.1997	0.7731	0.095	0.067	0.0649	0.1094	0.8906	78.0412	10.0902	2.8993	1.1718	0.0173	0.8076	3.828	2.383	0.29	100
9	680.8	7571.71	0.7657	0.0682	0.0882	0.0779	0.0818	0.9182	0.0635	0.7702	0.0947	0.0657	0.0694	0.1095	0.8905	78.0344	10.0856	2.8941	1.1713	0.0167	0.8071	3.828	2.383	0.29	100
10	680.9	7764.08	0.7689	0.0677	0.0806	0.0827	0.081	0.919	0.3521	0.765	0.0952	0.0641	0.0757	0.1107	0.8893	78.0241	10.0787	2.8862	1.1706	0.0158	0.8063	3.828	2.383	0.29	100
11	681	7997.52	0.7723	0.0671	0.0715	0.089	0.08	0.92	0.469	0.7598	0.0939	0.0623	0.084	0.11	0.89	78.0038	10.0652	2.8706	1.1692	0.0142	0.8046	3.828	2.383	0.29	100
12	681.1	8251.27	0.7752	0.0664	0.0619	0.0965	0.0788	0.9212	0.5664	0.753	0.0923	0.0605	0.0943	0.1092	0.8908	77.9782	10.0481	2.8508	1.1675	0.0124	0.8023	3.828	2.383	0.29	100
13	681.2	8455.28	0.7769	0.0657	0.0544	0.103	0.078	0.922	0.4985	0.7463	0.0912	0.0588	0.1037	0.1089	0.8911	77.9519	10.0306	2.8304	1.1658	0.0108	0.7997	3.828	2.383	0.29	100
14	681.3	8587.55	0.7776	0.0652	0.0496	0.1075	0.0774	0.9226	0.3447	0.7424	0.0907	0.057	0.1098	0.1089	0.8911	77.9307	10.0165	2.8139	1.1644	0.0097	0.7975	3.828	2.383	0.29	100
15	681.4	8645.26	0.7778	0.0651	0.0477	0.1095	0.0772	0.9228	0.1571	0.7407	0.0905	0.0562	0.1126	0.1089	0.8911	77.9176	10.0078	2.8037	1.1635	0.0091	0.7961	3.828	2.383	0.29	100
16	681.5	8701.98	0.7778	0.0649	0.0458	0.1115	0.077	0.923	0.1582	0.739	0.0903	0.0553	0.1154	0.1089	0.8911	77.9091	10.0022	2.7971	1.163	0.0087	0.7952	3.828	2.383	0.29	100
17	681.6	8804.55	0.7779	0.0645	0.0424	0.1153	0.0765	0.9235	0.2947	0.7359	0.09	0.0535	0.1206	0.109	0.891	77.8977	9.9946	2.7882	1.1623	0.0082	0.7939	3.828	2.383	0.29	100
18	681.7	8893.81	0.7778	0.0641	0.0395	0.1186	0.0762	0.9238	0.2676	0.7332	0.0897	0.0518	0.1253	0.109	0.891	77.8834	9.985	2.777	1.1614	0.0076	0.7922	3.828	2.383	0.29	100
19	681.8	8973.74	0.7775	0.0638	0.0369	0.1218	0.0758	0.9242	0.2489	0.7309	0.0895	0.0501	0.1295	0.1091	0.8909	77.8703	9.9763	2.7668	1.1606	0.0071	0.7906	3.828	2.383	0.29	100
20	681.9	9045.25	0.7771	0.0635	0.0347	0.1246	0.0756	0.9244	0.2306	0.729	0.0894	0.0484	0.1333	0.1092	0.8908	77.858	9.9681	2.7572	1.1598	0.0067	0.7891	3.828	2.383	0.29	100
21	682	9103.69	0.7766	0.0633	0.0331	0.127	0.0753	0.9247	0.1942	0.7275	0.0893	0.0467	0.1365	0.1093	0.8907	77.8467	9.9606	2.7484	1.1591	0.0063	0.7877	3.828	2.383	0.29	100

## Sheet: ET45_1
No.	T(C)	P(bars)	Xalm	Xprp	Xsps	Xgrs	Mg#	Fe#	obs_Xalm	obs_Xprp	obs_Xsps	obs_Xgrs	obs_Mg#	obs_Fe#	blk_Si	blk_Al	blk_Fe	blk_Mg	blk_Mn	blk_Ca	blk_Na	blk_K	blk_Ti	blk_H
1	518.964	4310.47	0.700141	0.0287373	0.138506	0.132616	0.0394267	0.960573	0.666	0.0387	0.147	0.1483	0.054917	0.945083	53.7606	24.7171	6.77628	2.53691	0.0468716	0.981548	3.045	5.284	0.375	100
2	518.659	4393.36	0.69734	0.0282627	0.136467	0.13793	0.0389507	0.961049	0.6681	0.0359	0.1437	0.1523	0.0509943	0.949006	53.7497	24.7098	6.76864	2.5366	0.0453622	0.980095	3.045	5.284	0.375	100
3	518.44	4431.1	0.695608	0.0280064	0.135798	0.140587	0.0387034	0.961297	0.6645	0.0361	0.1432	0.1562	0.0515273	0.948473	53.748	24.7087	6.76744	2.53655	0.0451287	0.979858	3.045	5.284	0.375	100
4	518.463	4430.35	0.695751	0.0280213	0.135734	0.140494	0.0387156	0.961284	0.663	0.0364	0.1448	0.156	0.0520446	0.947955	53.7475	24.7083	6.76712	2.53654	0.0450663	0.979793	3.045	5.284	0.375	100
5	518.55	4419.28	0.696392	0.0281085	0.135839	0.139661	0.0387971	0.961203	0.6626	0.0366	0.145	0.1558	0.0523455	0.947654	53.7473	24.7082	6.76697	2.53653	0.045037	0.979763	3.045	5.284	0.375	100
6	518.64	4408.17	0.69705	0.0281976	0.135927	0.138825	0.03888	0.96112	0.6602	0.0386	0.1447	0.1565	0.0552376	0.944762	53.7473	24.7082	6.76696	2.53653	0.0450345	0.97976	3.045	5.284	0.375	100
7	518.993	4368.4	0.6996	0.0285359	0.136061	0.135803	0.0391904	0.96081	0.6636	0.0391	0.1445	0.1528	0.0556425	0.944357	53.7469	24.7079	6.76666	2.53652	0.0449769	0.979702	3.045	5.284	0.375	100
8	518.987	4374.61	0.699486	0.0285092	0.135835	0.13617	0.0391612	0.960839	0.6628	0.0393	0.1443	0.1535	0.0559749	0.944025	53.7465	24.7076	6.76638	2.53651	0.0449212	0.979647	3.045	5.284	0.375	100
9	519.07	4364.69	0.700094	0.0285913	0.13588	0.135434	0.0392368	0.960763	0.6647	0.0388	0.1444	0.1521	0.0551528	0.944847	53.746	24.7073	6.76603	2.53649	0.0448543	0.97958	3.045	5.284	0.375	100
10	518.908	4403.76	0.698676	0.0283585	0.134966	0.137999	0.0390057	0.960994	0.663	0.0386	0.1432	0.1553	0.0550171	0.944983	53.745	24.7067	6.76538	2.53647	0.0447282	0.979453	3.045	5.284	0.375	100
11	519.321	4398.93	0.701156	0.0286002	0.133393	0.136851	0.0391914	0.960809	0.6661	0.0388	0.1413	0.1538	0.0550433	0.944957	53.7442	24.7061	6.76481	2.53644	0.0446174	0.979339	3.045	5.284	0.375	100
12	519.38	4419.96	0.701254	0.0285542	0.132264	0.137928	0.0391256	0.960874	0.6659	0.0388	0.1401	0.1552	0.0550589	0.944941	53.7393	24.7029	6.76137	2.5363	0.0439627	0.978667	3.045	5.284	0.375	100
13	519.272	4440.88	0.700373	0.028418	0.131845	0.139364	0.0389933	0.961007	0.6657	0.0382	0.1395	0.1566	0.0542691	0.945731	53.7365	24.701	6.75939	2.53622	0.0435894	0.978278	3.045	5.284	0.375	100
14	519.103	4487.15	0.698855	0.0281576	0.130557	0.14243	0.0387305	0.96127	0.664	0.0378	0.138	0.1602	0.0538615	0.946138	53.7346	24.6997	6.75804	2.53617	0.0433362	0.978008	3.045	5.284	0.375	100
15	519.204	4487.71	0.699439	0.0282096	0.130109	0.142243	0.0387682	0.961232	0.6642	0.0381	0.1376	0.1602	0.0542503	0.94575	53.7332	24.6988	6.75711	2.53613	0.043163	0.977819	3.045	5.284	0.375	100
16	519.873	4469.78	0.70357	0.0286387	0.128047	0.139744	0.0391127	0.960887	0.6677	0.0392	0.1355	0.1577	0.0554534	0.944547	53.7319	24.6979	6.75615	2.53609	0.0429843	0.977624	3.045	5.284	0.375	100
17	520.323	4477.04	0.706124	0.028858	0.125818	0.1392	0.0392635	0.960736	0.672	0.0388	0.1328	0.1564	0.0545864	0.945414	53.7249	24.6932	6.75123	2.53589	0.042088	0.976645	3.045	5.284	0.375	100
18	520.624	4479.39	0.707869	0.0290156	0.124424	0.138691	0.039376	0.960624	0.6726	0.0397	0.1314	0.1563	0.0557349	0.944265	53.718	24.6887	6.7464	2.53569	0.0412272	0.975693	3.045	5.284	0.375	100
19	520.466	4502.01	0.706683	0.0288444	0.124137	0.140335	0.0392159	0.960784	0.6721	0.0389	0.1311	0.1579	0.0547117	0.945288	53.7136	24.6858	6.7433	2.53557	0.0406837	0.975087	3.045	5.284	0.375	100
20	520.569	4499.55	0.707312	0.0289098	0.123806	0.139972	0.0392678	0.960732	0.671	0.0399	0.1309	0.1582	0.056126	0.943874	53.7134	24.6856	6.74312	2.53556	0.0406517	0.975051	3.045	5.284	0.375	100
21	520.995	4503.84	0.709768	0.0291299	0.121797	0.139305	0.0394235	0.960577	0.6766	0.0389	0.1283	0.1563	0.0543676	0.945632	53.7123	24.6848	6.74232	2.53553	0.0405119	0.974893	3.045	5.284	0.375	100
22	521.396	4508.74	0.712067	0.0293349	0.119867	0.138731	0.0395668	0.960433	0.6795	0.0391	0.1261	0.1554	0.0544114	0.945589	53.7059	24.6806	6.7378	2.53534	0.0397352	0.974005	3.045	5.284	0.375	100
23	521.501	4514.42	0.712621	0.0293724	0.119174	0.138833	0.0395858	0.960414	0.6811	0.0387	0.1251	0.1551	0.0537649	0.946235	53.6997	24.6765	6.73341	2.53516	0.038996	0.973149	3.045	5.284	0.375	100
24	521.589	4545.26	0.712789	0.0293062	0.117484	0.140421	0.0394911	0.960509	0.6801	0.039	0.1234	0.1575	0.0542345	0.945766	53.6953	24.6735	6.73024	2.53503	0.0384688	0.972531	3.045	5.284	0.375	100
25	521.754	4569.58	0.713493	0.0293083	0.115726	0.141473	0.0394565	0.960544	0.6799	0.0393	0.1216	0.1591	0.054644	0.945356	53.6929	24.6719	6.72855	2.53496	0.0381907	0.972198	3.045	5.284	0.375	100
26	522.581	4580.83	0.71822	0.0297324	0.111712	0.140336	0.0397517	0.960248	0.6841	0.0403	0.1174	0.1582	0.0556322	0.944368	53.6877	24.6685	6.72484	2.53481	0.0375887	0.971462	3.045	5.284	0.375	100
27	523.255	4584.3	0.722141	0.0301043	0.108664	0.139091	0.0400193	0.959981	0.6893	0.0405	0.1139	0.1563	0.0554947	0.944505	53.6742	24.6594	6.71511	2.53441	0.0360753	0.969561	3.045	5.284	0.375	100
28	524.38	4600.1	0.728574	0.0306968	0.103126	0.137604	0.0404293	0.959571	0.6979	0.0406	0.1077	0.1538	0.0549763	0.945024	53.6539	24.6459	6.70044	2.53379	0.0338994	0.966749	3.045	5.284	0.375	100
29	526.265	4681.31	0.738732	0.0315051	0.0915571	0.138205	0.0409031	0.959097	0.7075	0.0422	0.0953	0.155	0.0562892	0.943711	53.6127	24.6184	6.67026	2.53252	0.029832	0.961068	3.045	5.284	0.375	100
30	526.543	4693.24	0.74023	0.0316271	0.0898539	0.138289	0.0409753	0.959025	0.709	0.0425	0.0935	0.1552	0.0565536	0.943446	53.6017	24.6111	6.66215	2.53217	0.0288274	0.959552	3.045	5.284	0.375	100
31	526.878	4704.17	0.742075	0.0317887	0.0879423	0.138194	0.0410779	0.958922	0.711	0.0429	0.0915	0.1553	0.0569041	0.943096	53.5951	24.6068	6.6573	2.53196	0.028238	0.958645	3.045	5.284	0.375	100
32	527.461	4722.11	0.745282	0.0320761	0.0846721	0.13797	0.041263	0.958737	0.7137	0.0437	0.088	0.1554	0.0576974	0.942303	53.5876	24.6017	6.65169	2.53172	0.0275732	0.9576	3.045	5.284	0.375	100
33	527.923	4740.33	0.747779	0.032291	0.0819156	0.138014	0.041395	0.958605	0.716	0.044	0.085	0.1555	0.0578947	0.942105	53.5742	24.5928	6.64171	2.53129	0.0264403	0.955754	3.045	5.284	0.375	100
34	528.339	4752.46	0.750074	0.0325032	0.0796102	0.137813	0.0415336	0.958466	0.7185	0.0445	0.0826	0.1555	0.0583224	0.941678	53.5627	24.5851	6.63311	2.53092	0.0254981	0.954167	3.045	5.284	0.375	100
35	528.736	4770.55	0.752187	0.0326819	0.0771469	0.137984	0.0416399	0.95836	0.7195	0.0449	0.08	0.1557	0.0587389	0.941261	53.5528	24.5785	6.62566	2.5306	0.0247076	0.952798	3.045	5.284	0.375	100
36	529.384	4792.16	0.755711	0.0330087	0.0734639	0.137817	0.0418509	0.958149	0.7222	0.0457	0.076	0.1561	0.059513	0.940487	53.542	24.5713	6.61757	2.53025	0.0238778	0.951314	3.045	5.284	0.375	100
37	530.284	4836.74	0.760425	0.0334136	0.067772	0.138389	0.0420912	0.957909	0.726	0.0462	0.07	0.1564	0.0598291	0.940171	53.5117	24.5511	6.59461	2.52924	0.021687	0.947129	3.045	5.284	0.375	100
38	530.778	4855.6	0.76306	0.0336619	0.0648913	0.138386	0.0422505	0.95775	0.7295	0.0469	0.067	0.1567	0.060407	0.939593	53.4978	24.5419	6.58408	2.52878	0.0207482	0.945212	3.045	5.284	0.375	100
39	531.654	4857.63	0.768053	0.0342327	0.0610713	0.136644	0.042669	0.957331	0.7361	0.047	0.0629	0.154	0.0600179	0.939982	53.4831	24.5321	6.57288	2.52829	0.0197957	0.94318	3.045	5.284	0.375	100
40	531.935	4841.29	0.769836	0.0344836	0.0605127	0.135168	0.042873	0.957127	0.7393	0.0467	0.0623	0.1517	0.0594148	0.940585	53.462	24.518	6.55667	2.52756	0.0185066	0.940296	3.045	5.284	0.375	100
41	532.613	4847.81	0.773621	0.0349168	0.0573474	0.134115	0.0431851	0.956815	0.7445	0.0466	0.0589	0.1499	0.0589053	0.941095	53.4586	24.5157	6.55398	2.52744	0.0182956	0.939825	3.045	5.284	0.375	100
42	532.858	4876.54	0.774681	0.0349712	0.055192	0.135156	0.0431929	0.956807	0.7447	0.047	0.0566	0.1517	0.0593659	0.940634	53.4403	24.5035	6.53986	2.52681	0.0172491	0.937377	3.045	5.284	0.375	100
43	533.094	4945.94	0.775231	0.0348652	0.0514661	0.138438	0.0430383	0.956962	0.7433	0.0478	0.0528	0.1562	0.0604222	0.939578	53.4138	24.4859	6.51935	2.52588	0.0158143	0.933775	3.045	5.284	0.375	100
44	533.277	4989.43	0.775765	0.0348263	0.0489651	0.140443	0.042964	0.957036	0.7423	0.0484	0.0502	0.1592	0.0612116	0.938788	53.3988	24.4758	6.50767	2.52536	0.0150485	0.931682	3.045	5.284	0.375	100
45	533.94	4996.03	0.779376	0.035262	0.0459978	0.139364	0.0432855	0.956714	0.7471	0.0484	0.0471	0.1574	0.0608422	0.939158	53.3909	24.4706	6.50158	2.52508	0.0146642	0.93058	3.045	5.284	0.375	100
46	534.73	4982.36	0.783903	0.0358731	0.0433068	0.136917	0.0437596	0.95624	0.7529	0.0489	0.0443	0.1541	0.0609878	0.939012	53.37	24.4567	6.48531	2.52435	0.013704	0.92767	3.045	5.284	0.375	100
47	535.437	4942.92	0.788263	0.0365332	0.0418782	0.133325	0.0442936	0.955706	0.7585	0.0494	0.0428	0.1493	0.0611462	0.938854	53.3439	24.4393	6.46481	2.52341	0.0125761	0.924102	3.045	5.284	0.375	100
48	536.009	4936.46	0.791459	0.0369791	0.0397579	0.131804	0.0446371	0.955363	0.7619	0.05	0.0406	0.1475	0.0615839	0.938416	53.3379	24.4353	6.4601	2.52319	0.0123259	0.923306	3.045	5.284	0.375	100

## Sheet: ET45_2
No.	T(C)	P(bars)	Xalm	Xprp	Xsps	Xgrs	Mg#	Fe#	obs_Xalm	obs_Xprp	obs_Xsps	obs_Xgrs	obs_Mg#	obs_Fe#	blk_Si	blk_Al	blk_Fe	blk_Mg	blk_Mn	blk_Ca	blk_Na	blk_K	blk_Ti	blk_H
1	518.954	4310.8	0.700082	0.028731	0.138534	0.132653	0.0394216	0.960578	0.7001	0.0287	0.1385	0.1326	0.0393798	0.96062	53.7607	24.7171	6.77632	2.53691	0.0468815	0.981558	3.045	5.284	0.375	100
2	518.666	4391.71	0.697397	0.0282723	0.136508	0.137822	0.0389603	0.96104	0.6973	0.0283	0.1365	0.1379	0.0390022	0.960998	53.7498	24.7098	6.76869	2.5366	0.0453726	0.980104	3.045	5.284	0.375	100
3	518.436	4431.53	0.695578	0.0280025	0.135798	0.140621	0.0386999	0.9613	0.6956	0.028	0.1358	0.1406	0.0386954	0.961305	53.748	24.7087	6.76748	2.53655	0.0451348	0.979864	3.045	5.284	0.375	100
4	518.455	4431.2	0.695698	0.0280143	0.135729	0.140559	0.0387091	0.961291	0.6958	0.028	0.1357	0.1405	0.0386847	0.961315	53.7475	24.7084	6.76713	2.53654	0.0450678	0.979794	3.045	5.284	0.375	100
5	518.547	4420.65	0.696356	0.0281017	0.135794	0.139748	0.03879	0.96121	0.6964	0.0281	0.1358	0.1397	0.0387854	0.961215	53.7473	24.7082	6.76698	2.53653	0.0450383	0.979764	3.045	5.284	0.375	100
6	518.652	4409.2	0.697109	0.0282004	0.135832	0.138858	0.0388805	0.96112	0.697	0.0282	0.1359	0.1388	0.0388858	0.961114	53.7472	24.7081	6.7669	2.53653	0.0450221	0.979747	3.045	5.284	0.375	100
7	518.975	4368.45	0.699495	0.0285259	0.136136	0.135844	0.0391829	0.960817	0.6996	0.0285	0.1361	0.1358	0.039143	0.960857	53.7469	24.7079	6.76666	2.53652	0.0449752	0.979699	3.045	5.284	0.375	100
8	518.986	4375.77	0.699468	0.0285045	0.13579	0.136237	0.0391559	0.960844	0.6995	0.0285	0.1358	0.1362	0.0391484	0.960852	53.7467	24.7078	6.76654	2.53651	0.044952	0.979676	3.045	5.284	0.375	100
9	519.098	4363.18	0.700282	0.0286127	0.135817	0.135289	0.0392549	0.960745	0.7001	0.0286	0.1359	0.1354	0.039248	0.960752	53.7459	24.7072	6.76597	2.53649	0.0448408	0.979564	3.045	5.284	0.375	100
10	518.918	4402.54	0.698747	0.0283681	0.134976	0.13791	0.0390146	0.960985	0.6987	0.0284	0.135	0.138	0.0390593	0.960941	53.7449	24.7066	6.7653	2.53646	0.0447122	0.979435	3.045	5.284	0.375	100
11	519.314	4399.64	0.701108	0.0285939	0.133392	0.136906	0.0391857	0.960814	0.7012	0.0286	0.1334	0.1369	0.0391888	0.960811	53.7442	24.7061	6.76481	2.53644	0.0446166	0.979338	3.045	5.284	0.375	100
12	519.4	4418.39	0.701389	0.0285709	0.132244	0.137796	0.0391403	0.96086	0.7013	0.0286	0.1323	0.1379	0.0391835	0.960817	53.7393	24.7029	6.76138	2.5363	0.0439652	0.978669	3.045	5.284	0.375	100
13	519.273	4442.04	0.700368	0.0284145	0.131789	0.139428	0.038989	0.961011	0.7004	0.0284	0.1318	0.1394	0.0389682	0.961032	53.7364	24.7009	6.75932	2.53622	0.0435754	0.978263	3.045	5.284	0.375	100
14	519.122	4485.51	0.698983	0.0281735	0.130551	0.142293	0.0387448	0.961255	0.6989	0.0282	0.1306	0.1424	0.0387842	0.961216	53.7344	24.6996	6.75797	2.53617	0.0433222	0.977992	3.045	5.284	0.375	100
15	519.211	4488.13	0.699476	0.028212	0.13006	0.142252	0.0387693	0.961231	0.6994	0.0282	0.1301	0.1422	0.0387576	0.961242	53.7332	24.6988	6.75707	2.53613	0.0431541	0.977809	3.045	5.284	0.375	100
16	519.865	4470.71	0.703511	0.0286307	0.128043	0.139815	0.0391054	0.960895	0.7036	0.0286	0.128	0.1397	0.0390604	0.96094	53.7317	24.6978	6.75606	2.53609	0.0429664	0.977604	3.045	5.284	0.375	100
17	520.347	4476.95	0.70627	0.0288718	0.125716	0.139142	0.0392738	0.960726	0.7061	0.0289	0.1258	0.1392	0.0393197	0.96068	53.7249	24.6932	6.75124	2.53589	0.04209	0.976647	3.045	5.284	0.375	100
18	520.619	4479.57	0.707837	0.0290121	0.124438	0.138712	0.0393732	0.960627	0.7079	0.029	0.1244	0.1387	0.0393541	0.960646	53.7177	24.6885	6.74617	2.53569	0.0411867	0.975647	3.045	5.284	0.375	100
19	520.455	4503.24	0.7066	0.0288334	0.124135	0.140432	0.0392059	0.960794	0.7067	0.0288	0.1241	0.1403	0.039157	0.960843	53.7137	24.6858	6.74334	2.53557	0.0406898	0.975093	3.045	5.284	0.375	100
20	520.56	4500.09	0.707254	0.0289029	0.123821	0.140023	0.0392619	0.960738	0.7073	0.0289	0.1238	0.14	0.0392556	0.960744	53.7134	24.6856	6.74314	2.53556	0.0406551	0.975054	3.045	5.284	0.375	100
21	520.984	4504.13	0.7097	0.0291226	0.121833	0.139345	0.0394177	0.960582	0.7098	0.0291	0.1218	0.1393	0.0393829	0.960617	53.7123	24.6849	6.74237	2.53553	0.0405196	0.974901	3.045	5.284	0.375	100
22	521.384	4508.34	0.712004	0.02933	0.119934	0.138732	0.0395638	0.960436	0.7121	0.0293	0.1199	0.1387	0.0395198	0.96048	53.706	24.6807	6.73789	2.53535	0.0397503	0.974021	3.045	5.284	0.375	100
23	521.502	4514.12	0.712629	0.029374	0.119184	0.138814	0.0395874	0.960413	0.7126	0.0294	0.1192	0.1388	0.0396226	0.960377	53.6999	24.6766	6.73356	2.53517	0.0390207	0.973177	3.045	5.284	0.375	100
24	521.588	4544.56	0.712792	0.0293083	0.117518	0.140382	0.0394937	0.960506	0.7128	0.0293	0.1175	0.1404	0.0394825	0.960517	53.6953	24.6736	6.73029	2.53503	0.0384756	0.972538	3.045	5.284	0.375	100
25	521.743	4569.71	0.713423	0.0293013	0.11577	0.141506	0.0394511	0.960549	0.7135	0.0293	0.1157	0.1415	0.0394453	0.960555	53.693	24.672	6.72862	2.53496	0.0382014	0.97221	3.045	5.284	0.375	100
26	522.573	4581.59	0.718169	0.0297254	0.11171	0.140396	0.0397455	0.960255	0.7182	0.0297	0.1117	0.1403	0.0397112	0.960289	53.6879	24.6686	6.72495	2.53481	0.0376062	0.971483	3.045	5.284	0.375	100
27	523.249	4583.99	0.72211	0.0301021	0.108703	0.139086	0.0400181	0.959982	0.7221	0.0301	0.1087	0.1391	0.040016	0.959984	53.6742	24.6594	6.71513	2.53441	0.0360772	0.969561	3.045	5.284	0.375	100
28	524.376	4599.82	0.728552	0.0306954	0.103156	0.137597	0.0404287	0.959571	0.7286	0.0307	0.1031	0.1376	0.040432	0.959568	53.654	24.646	6.70053	2.5338	0.0339115	0.966763	3.045	5.284	0.375	100
29	526.262	4680.87	0.738723	0.0315054	0.0915861	0.138185	0.0409039	0.959096	0.7387	0.0315	0.0916	0.1382	0.0408985	0.959102	53.6128	24.6185	6.67033	2.53252	0.0298418	0.961082	3.045	5.284	0.375	100
30	526.527	4693.76	0.740132	0.0316155	0.0899007	0.138352	0.0409662	0.959034	0.7402	0.0316	0.0899	0.1383	0.0409433	0.959057	53.6018	24.6112	6.66223	2.53217	0.0288368	0.959565	3.045	5.284	0.375	100
31	526.889	4704.64	0.742135	0.0317936	0.0878746	0.138197	0.0410808	0.958919	0.7421	0.0318	0.0879	0.1382	0.0410906	0.958909	53.5953	24.6069	6.65745	2.53197	0.0282562	0.958672	3.045	5.284	0.375	100
32	527.46	4721.57	0.745286	0.032078	0.084696	0.13794	0.0412651	0.958735	0.7453	0.0321	0.0847	0.138	0.0412915	0.958709	53.5873	24.6015	6.65149	2.53171	0.0275501	0.957561	3.045	5.284	0.375	100
33	527.937	4740.23	0.747862	0.0323001	0.0818596	0.137979	0.0414018	0.958598	0.7478	0.0323	0.0819	0.138	0.0414049	0.958595	53.5743	24.5929	6.64178	2.5313	0.0264475	0.955766	3.045	5.284	0.375	100
34	528.342	4752.7	0.750091	0.0325043	0.0795858	0.137819	0.041534	0.958466	0.7501	0.0325	0.0796	0.1378	0.0415282	0.958472	53.5624	24.585	6.63293	2.53091	0.025478	0.954131	3.045	5.284	0.375	100
35	528.753	4770.34	0.75229	0.0326937	0.077081	0.137935	0.0416489	0.958351	0.7522	0.0327	0.0771	0.138	0.0416614	0.958339	53.5527	24.5784	6.62559	2.5306	0.0246997	0.952784	3.045	5.284	0.375	100
36	529.376	4792.33	0.755662	0.0330027	0.0734921	0.137844	0.0418463	0.958154	0.7557	0.033	0.0735	0.1378	0.041841	0.958159	53.5417	24.5711	6.61734	2.53024	0.0238542	0.951271	3.045	5.284	0.375	100
37	530.275	4837.23	0.76037	0.033406	0.0677891	0.138435	0.042085	0.957915	0.7604	0.0334	0.0678	0.1384	0.0420761	0.957924	53.5118	24.5512	6.59472	2.52925	0.0216955	0.947146	3.045	5.284	0.375	100
38	530.787	4854.31	0.763128	0.033673	0.0649038	0.138295	0.0422602	0.95774	0.7631	0.0337	0.0649	0.1384	0.0422942	0.957706	53.4979	24.542	6.58417	2.52878	0.0207549	0.945225	3.045	5.284	0.375	100
39	531.639	4858.41	0.767958	0.0342194	0.0611042	0.136718	0.0426582	0.957342	0.7681	0.0342	0.0611	0.1366	0.0426274	0.957373	53.4832	24.5321	6.57291	2.52829	0.0197978	0.943186	3.045	5.284	0.375	100
40	531.874	4847.09	0.769423	0.0344199	0.0605474	0.13561	0.0428192	0.957181	0.7698	0.0345	0.0605	0.1352	0.0428944	0.957106	53.4623	24.5182	6.55684	2.52757	0.0185191	0.940325	3.045	5.284	0.375	100
41	532.616	4848.58	0.773627	0.0349156	0.0573068	0.134151	0.0431833	0.956817	0.7736	0.0349	0.0573	0.1341	0.0431664	0.956834	53.4589	24.5159	6.55426	2.52746	0.0183156	0.939869	3.045	5.284	0.375	100
42	532.862	4876.36	0.774705	0.0349745	0.0551827	0.135138	0.0431955	0.956805	0.7747	0.035	0.0552	0.1352	0.0432259	0.956774	53.4401	24.5034	6.53969	2.5268	0.0172367	0.937343	3.045	5.284	0.375	100
43	533.106	4943.82	0.77532	0.0348813	0.0515023	0.138296	0.0430526	0.956947	0.7752	0.0349	0.0515	0.1384	0.0430811	0.956919	53.4139	24.4859	6.51942	2.52588	0.0158193	0.933786	3.045	5.284	0.375	100
44	533.264	4989.69	0.775689	0.0348163	0.0490083	0.140486	0.0429563	0.957044	0.7758	0.0348	0.049	0.1404	0.0429312	0.957069	53.399	24.476	6.50786	2.52536	0.0150608	0.931716	3.045	5.284	0.375	100
45	533.943	4995.74	0.779398	0.0352654	0.045996	0.139341	0.0432884	0.956712	0.7794	0.0353	0.046	0.1394	0.0433288	0.956671	53.3912	24.4708	6.50181	2.52509	0.0146786	0.93062	3.045	5.284	0.375	100
46	534.74	4981.95	0.783963	0.0358818	0.0432821	0.136873	0.0437667	0.956233	0.7839	0.0359	0.0433	0.1369	0.0437912	0.956209	53.37	24.4567	6.48528	2.52434	0.0137031	0.927665	3.045	5.284	0.375	100
47	535.429	4943.58	0.788212	0.0365251	0.0418864	0.133376	0.044287	0.955713	0.7883	0.0365	0.0419	0.1333	0.0442532	0.955747	53.3438	24.4392	6.46474	2.5234	0.0125733	0.92409	3.045	5.284	0.375	100
48	536.008	4935.43	0.791465	0.0369822	0.0397997	0.131753	0.0446404	0.95536	0.7915	0.037	0.0398	0.1318	0.044659	0.955341	53.338	24.4353	6.46014	2.52319	0.0123291	0.923312	3.045	5.284	0.375	100

## Sheet: B5-1_p
No.	T(C)	P(bars)	Xalm	Xprp	Xsps	Xgrs	Mg#	Fe#	obs_Xalm	obs_Xprp	obs_Xsps	obs_Xgrs	obs_Mg#	obs_Fe#	blk_Si	blk_Al	blk_Fe	blk_Mg	blk_Mn	blk_Ca	blk_Na	blk_K	blk_Ti	blk_H
1	500.378	5857.89	0.462268	0.0241993	0.200452	0.313081	0.049745	0.950255	0.4621	0.0242	0.2006	0.3132	0.0497635	0.950236	60.83	19.87	5.49	3.97	0.09	1.19	3.41	4.58	0.57	100
2	500.405	5859.78	0.462379	0.0242064	0.200255	0.313159	0.0497474	0.950253	0.4621	0.0242	0.2006	0.3132	0.0497635	0.950236	60.8297	19.8698	5.48988	3.96999	0.0899481	1.18992	3.41	4.58	0.57	100
3	500.432	5860.1	0.462492	0.0242197	0.200233	0.313055	0.0497619	0.950238	0.4621	0.0242	0.2006	0.3132	0.0497635	0.950236	60.8292	19.8695	5.48964	3.96998	0.0898442	1.18976	3.41	4.58	0.57	100
4	500.432	5860.97	0.462489	0.0242159	0.200136	0.313159	0.0497547	0.950245	0.4621	0.0242	0.2006	0.3132	0.0497635	0.950236	60.8291	19.8694	5.48958	3.96998	0.0898186	1.18972	3.41	4.58	0.57	100
5	500.426	5862.15	0.462466	0.0242081	0.2	0.313325	0.0497419	0.950258	0.4621	0.0242	0.2006	0.3132	0.0497635	0.950236	60.8289	19.8693	5.48948	3.96997	0.0897755	1.18965	3.41	4.58	0.57	100
6	500.463	5863.67	0.46262	0.024222	0.199849	0.313309	0.0497533	0.950247	0.4621	0.0242	0.2005	0.3132	0.0497635	0.950236	60.8286	19.8691	5.48935	3.96997	0.0897185	1.18956	3.41	4.58	0.57	100
7	500.462	5863.76	0.462615	0.0242208	0.199838	0.313327	0.0497516	0.950248	0.4621	0.0242	0.2005	0.3132	0.0497635	0.950236	60.8281	19.8688	5.48914	3.96996	0.0896293	1.18942	3.41	4.58	0.57	100
8	500.46	5863.85	0.462608	0.0242197	0.199827	0.313345	0.0497501	0.95025	0.4621	0.0242	0.2005	0.3132	0.0497635	0.950236	60.8281	19.8688	5.48913	3.96995	0.0896254	1.18941	3.41	4.58	0.57	100
9	500.497	5865.38	0.462762	0.0242336	0.199676	0.313328	0.0497615	0.950239	0.4621	0.0242	0.2005	0.3132	0.0497635	0.950236	60.8281	19.8687	5.48913	3.96995	0.0896214	1.18941	3.41	4.58	0.57	100
10	500.496	5865.47	0.462756	0.0242325	0.199665	0.313346	0.0497599	0.95024	0.4621	0.0242	0.2005	0.3132	0.0497635	0.950236	60.8277	19.8684	5.48892	3.96994	0.0895322	1.18927	3.41	4.58	0.57	100
11	500.494	5865.56	0.46275	0.0242314	0.199654	0.313364	0.0497582	0.950242	0.4621	0.0242	0.2005	0.3132	0.0497635	0.950236	60.8276	19.8684	5.48891	3.96994	0.0895283	1.18926	3.41	4.58	0.57	100
12	500.493	5865.65	0.462744	0.0242302	0.199644	0.313382	0.0497566	0.950243	0.4622	0.0242	0.2005	0.3132	0.0497533	0.950247	60.8276	19.8684	5.4889	3.96994	0.0895243	1.18926	3.41	4.58	0.57	100
13	500.491	5865.74	0.462738	0.0242291	0.199633	0.3134	0.049755	0.950245	0.4622	0.0242	0.2004	0.3132	0.0497533	0.950247	60.8276	19.8684	5.48889	3.96994	0.0895204	1.18925	3.41	4.58	0.57	100
14	500.49	5865.83	0.462733	0.0242279	0.199622	0.313418	0.0497533	0.950247	0.4622	0.0242	0.2004	0.3132	0.0497533	0.950247	60.8276	19.8684	5.48888	3.96994	0.0895165	1.18924	3.41	4.58	0.57	100
15	500.507	5866.49	0.462802	0.0242343	0.199557	0.313407	0.0497588	0.950241	0.4622	0.0242	0.2004	0.3132	0.0497533	0.950247	60.8276	19.8684	5.48887	3.96994	0.0895125	1.18924	3.41	4.58	0.57	100
16	500.505	5866.57	0.462796	0.0242332	0.199546	0.313424	0.0497572	0.950243	0.4623	0.0242	0.2004	0.3132	0.0497431	0.950257	60.8274	19.8682	5.48878	3.96994	0.0894737	1.18918	3.41	4.58	0.57	100
17	500.504	5866.66	0.462791	0.024232	0.199535	0.313442	0.0497555	0.950245	0.4623	0.0242	0.2003	0.3132	0.0497431	0.950257	60.8273	19.8682	5.48877	3.96994	0.0894698	1.18917	3.41	4.58	0.57	100
18	500.502	5866.75	0.462784	0.0242309	0.199524	0.31346	0.0497539	0.950246	0.4623	0.0242	0.2003	0.3132	0.0497431	0.950257	60.8273	19.8682	5.48876	3.96994	0.0894658	1.18916	3.41	4.58	0.57	100
19	500.54	5868.28	0.462939	0.0242448	0.199373	0.313444	0.0497653	0.950235	0.4624	0.0242	0.2002	0.3132	0.0497328	0.950267	60.8273	19.8682	5.48876	3.96993	0.0894619	1.18916	3.41	4.58	0.57	100
20	500.528	5869	0.462892	0.0242359	0.199287	0.313585	0.0497527	0.950247	0.4624	0.0242	0.2002	0.3132	0.0497328	0.950267	60.8269	19.8679	5.48855	3.96992	0.0893727	1.18902	3.41	4.58	0.57	100
21	500.545	5869.66	0.462962	0.0242423	0.199221	0.313574	0.0497581	0.950242	0.4625	0.0242	0.2001	0.3132	0.0497226	0.950277	60.8267	19.8678	5.48847	3.96992	0.0893407	1.18897	3.41	4.58	0.57	100
22	500.582	5871.19	0.463116	0.0242563	0.19907	0.313558	0.0497695	0.950231	0.4626	0.0242	0.2	0.3132	0.0497124	0.950288	60.8265	19.8677	5.48838	3.96992	0.089302	1.18891	3.41	4.58	0.57	100
23	500.571	5871.91	0.46307	0.0242473	0.198983	0.3137	0.0497568	0.950243	0.4626	0.0242	0.1999	0.3132	0.0497124	0.950288	60.8261	19.8674	5.48818	3.9699	0.0892128	1.18877	3.41	4.58	0.57	100
24	500.594	5872.58	0.463163	0.0242567	0.19892	0.313661	0.0497656	0.950234	0.4627	0.0242	0.1998	0.3132	0.0497022	0.950298	60.8259	19.8673	5.4881	3.9699	0.0891808	1.18871	3.41	4.58	0.57	100
25	500.592	5872.66	0.463157	0.0242556	0.198909	0.313679	0.049764	0.950236	0.4628	0.0242	0.1997	0.3132	0.049692	0.950308	60.8257	19.8671	5.48801	3.9699	0.0891396	1.18865	3.41	4.58	0.57	100
26	500.764	5871.67	0.463869	0.0243527	0.199111	0.312667	0.0498803	0.95012	0.4629	0.0243	0.1996	0.3132	0.0498768	0.950123	60.8257	19.8671	5.488	3.96989	0.0891357	1.18864	3.41	4.58	0.57	100
27	500.709	5874.62	0.463643	0.0243112	0.198752	0.313294	0.0498226	0.950177	0.4631	0.0243	0.1994	0.3132	0.0498564	0.950144	60.8256	19.8671	5.48797	3.96989	0.0891261	1.18863	3.41	4.58	0.57	100
28	500.747	5876.15	0.463798	0.0243251	0.198599	0.313278	0.049834	0.950166	0.4632	0.0243	0.1993	0.3132	0.0498462	0.950154	60.825	19.8667	5.48768	3.96988	0.0889978	1.18843	3.41	4.58	0.57	100
29	500.774	5876.48	0.46391	0.0243385	0.198577	0.313174	0.0498486	0.950151	0.4633	0.0243	0.1991	0.3132	0.0498359	0.950164	60.8245	19.8664	5.48747	3.96987	0.0889087	1.18829	3.41	4.58	0.57	100
30	500.743	5877.99	0.463783	0.0243158	0.198392	0.31351	0.0498173	0.950183	0.4635	0.0243	0.1989	0.3132	0.0498155	0.950184	60.8244	19.8663	5.48741	3.96986	0.0888831	1.18825	3.41	4.58	0.57	100
31	500.78	5879.52	0.463937	0.0243297	0.19824	0.313493	0.0498287	0.950171	0.4637	0.0243	0.1987	0.3133	0.0497951	0.950205	60.8241	19.8661	5.48726	3.96986	0.0888184	1.18814	3.41	4.58	0.57	100
32	500.774	5880.7	0.463914	0.0243219	0.198104	0.31366	0.0498159	0.950184	0.4639	0.0243	0.1985	0.3133	0.0497747	0.950225	60.8236	19.8657	5.48705	3.96985	0.0887292	1.188	3.41	4.58	0.57	100
33	500.889	5881.25	0.46439	0.0243818	0.198103	0.313126	0.0498839	0.950116	0.4641	0.0244	0.1983	0.3133	0.0499488	0.950051	60.8233	19.8656	5.48691	3.96984	0.0886723	1.18791	3.41	4.58	0.57	100
34	500.927	5883.21	0.464546	0.0243944	0.197903	0.313156	0.0498923	0.950108	0.4644	0.0244	0.198	0.3133	0.0499182	0.950082	60.823	19.8653	5.48676	3.96983	0.0886058	1.18781	3.41	4.58	0.57	100
35	500.942	5884.78	0.464609	0.0243962	0.197734	0.313261	0.0498894	0.950111	0.4646	0.0244	0.1977	0.3133	0.0498978	0.950102	60.8224	19.865	5.4865	3.96982	0.0884951	1.18763	3.41	4.58	0.57	100
36	500.988	5889.47	0.464801	0.0244022	0.197233	0.313564	0.0498816	0.950118	0.4649	0.0244	0.1973	0.3133	0.0498672	0.950133	60.822	19.8647	5.4863	3.96981	0.0884118	1.1875	3.41	4.58	0.57	100
37	501.019	5891.69	0.46493	0.0244101	0.197	0.31366	0.0498838	0.950116	0.4653	0.0244	0.197	0.3133	0.0498264	0.950174	60.8208	19.8638	5.48572	3.96978	0.0881626	1.1871	3.41	4.58	0.57	100
38	501.226	5896.29	0.465791	0.0245042	0.196591	0.313114	0.0499785	0.950022	0.4656	0.0245	0.1966	0.3133	0.0499898	0.95001	60.8201	19.8634	5.48543	3.96976	0.0880412	1.18691	3.41	4.58	0.57	100
39	501.255	5900.37	0.465911	0.0245034	0.196149	0.313436	0.0499646	0.950035	0.466	0.0245	0.1961	0.3134	0.049949	0.950051	60.8186	19.8624	5.48472	3.96972	0.0877416	1.18643	3.41	4.58	0.57	100
40	501.437	5906.65	0.466671	0.0245774	0.195538	0.313214	0.0500306	0.949969	0.4664	0.0246	0.1956	0.3134	0.0501018	0.949898	60.8175	19.8617	5.48421	3.9697	0.0875294	1.18609	3.41	4.58	0.57	100
41	501.506	5911.18	0.466958	0.0245966	0.195065	0.31338	0.0500385	0.949962	0.4669	0.0246	0.1951	0.3134	0.0500509	0.949949	60.8156	19.8604	5.48332	3.96965	0.087155	1.18549	3.41	4.58	0.57	100
42	501.554	5916.59	0.46716	0.0246012	0.194485	0.313754	0.0500266	0.949973	0.4674	0.0246	0.1946	0.3134	0.05	0.95	60.8143	19.8596	5.48273	3.96962	0.086907	1.1851	3.41	4.58	0.57	100
43	501.775	5923.1	0.468082	0.0246958	0.193866	0.313356	0.0501155	0.949885	0.4679	0.0247	0.1939	0.3134	0.0501421	0.949858	60.8129	19.8586	5.48204	3.96958	0.0866224	1.18464	3.41	4.58	0.57	100
44	501.894	5929.53	0.468579	0.0247349	0.193206	0.313481	0.0501403	0.94986	0.4685	0.0247	0.1933	0.3135	0.0500811	0.949919	60.8108	19.8572	5.48108	3.96953	0.086225	1.18399	3.41	4.58	0.57	100
45	502.05	5935.52	0.46923	0.0247962	0.192612	0.313361	0.0501921	0.949808	0.4692	0.0248	0.1926	0.3135	0.0502024	0.949798	60.809	19.856	5.48022	3.96949	0.0858667	1.18341	3.41	4.58	0.57	100
46	502.133	5942.46	0.46958	0.024814	0.191878	0.313728	0.0501907	0.949809	0.4699	0.0248	0.1918	0.3135	0.0501314	0.949869	60.8072	19.8548	5.47937	3.96944	0.085518	1.18285	3.41	4.58	0.57	100
47	502.368	5951.63	0.470564	0.0249062	0.190966	0.313564	0.0502679	0.949732	0.4706	0.0249	0.1909	0.3135	0.0502523	0.949748	60.8052	19.8535	5.47846	3.96939	0.0851474	1.18224	3.41	4.58	0.57	100
48	502.606	5962.01	0.471562	0.0249955	0.18992	0.313523	0.0503377	0.949662	0.4715	0.025	0.19	0.3136	0.0503525	0.949648	60.8025	19.8516	5.47715	3.96932	0.0846162	1.18137	3.41	4.58	0.57	100
49	502.843	5972.13	0.472555	0.0250855	0.188901	0.313458	0.0504089	0.949591	0.4724	0.0251	0.189	0.3136	0.0504523	0.949548	60.7993	19.8496	5.47568	3.96925	0.0840253	1.18039	3.41	4.58	0.57	100
50	503.09	5982.45	0.473593	0.0251806	0.187862	0.313364	0.0504852	0.949515	0.4734	0.0252	0.1879	0.3136	0.0505415	0.949458	60.7963	19.8475	5.47424	3.96917	0.083449	1.17944	3.41	4.58	0.57	100
51	503.248	5994.33	0.474259	0.0252203	0.186612	0.313909	0.0504931	0.949507	0.4744	0.0252	0.1866	0.3137	0.0504404	0.94956	60.7932	19.8454	5.47276	3.96909	0.0828598	1.17845	3.41	4.58	0.57	100
52	503.49	6006.82	0.47528	0.0253045	0.185329	0.314087	0.0505498	0.94945	0.4756	0.0253	0.1853	0.3137	0.0505091	0.949491	60.7898	19.8432	5.47115	3.969	0.0822262	1.17739	3.41	4.58	0.57	100
53	503.91	6021.84	0.477051	0.0254785	0.18384	0.31363	0.0507005	0.9493	0.4769	0.0255	0.1839	0.3138	0.0507564	0.949244	60.786	19.8407	5.46937	3.96891	0.0815354	1.17622	3.41	4.58	0.57	100
54	503.997	6031.39	0.477422	0.0255012	0.1832	0.313876	0.0507059	0.949294	0.4775	0.0255	0.1832	0.3138	0.0506958	0.949304	60.7813	19.8375	5.46711	3.96879	0.0806643	1.17473	3.41	4.58	0.57	100
55	504.279	6046.37	0.478621	0.0256117	0.182027	0.31374	0.0507934	0.949207	0.4788	0.0256	0.182	0.3136	0.0507534	0.949247	60.7795	19.8363	5.46626	3.96874	0.0803382	1.17417	3.41	4.58	0.57	100
56	504.736	6062.07	0.480552	0.0257999	0.180304	0.313344	0.0509525	0.949048	0.4805	0.0258	0.1803	0.3133	0.0509579	0.949042	60.7759	19.8339	5.46453	3.96865	0.0796786	1.17303	3.41	4.58	0.57	100
57	505.19	6077.63	0.482479	0.0259886	0.178584	0.312949	0.0511116	0.948888	0.4824	0.026	0.1786	0.3131	0.0511408	0.948859	60.7704	19.8303	5.46191	3.96851	0.0786961	1.17133	3.41	4.58	0.57	100
58	505.673	6098.31	0.484534	0.0261861	0.176664	0.312615	0.0512728	0.948727	0.4843	0.0262	0.1767	0.3128	0.0513222	0.948678	60.765	19.8267	5.45928	3.96837	0.0777208	1.16962	3.41	4.58	0.57	100
59	506.162	6120.31	0.486624	0.0263866	0.17469	0.312299	0.0514347	0.948565	0.4864	0.0264	0.1747	0.3125	0.0514821	0.948518	60.7589	19.8226	5.45634	3.96821	0.0766487	1.16772	3.41	4.58	0.57	100
60	506.67	6145.11	0.488805	0.0265946	0.17259	0.312011	0.0516	0.9484	0.4887	0.0266	0.1726	0.3121	0.0516204	0.94838	60.7527	19.8184	5.45329	3.96804	0.0755555	1.16577	3.41	4.58	0.57	100
61	507.201	6179.13	0.491099	0.0268051	0.170219	0.311877	0.0517568	0.948243	0.4911	0.0268	0.1702	0.3118	0.0517474	0.948253	60.746	19.814	5.45003	3.96787	0.0744039	1.16368	3.41	4.58	0.57	100
62	507.853	6197.72	0.493891	0.0270897	0.167783	0.311237	0.0519975	0.948002	0.4937	0.0271	0.1678	0.3114	0.0520353	0.947965	60.7385	19.809	5.44635	3.96767	0.0731288	1.16135	3.41	4.58	0.57	100
63	508.42	6238.64	0.496365	0.0273139	0.165134	0.311188	0.0521577	0.947842	0.4965	0.0273	0.1651	0.311	0.0521191	0.947881	60.7305	19.8037	5.4424	3.96745	0.0717863	1.15886	3.41	4.58	0.57	100
64	509.108	6268.98	0.499347	0.0276087	0.162312	0.310732	0.0523929	0.947607	0.4995	0.0276	0.1623	0.3106	0.052362	0.947638	60.722	19.798	5.4382	3.96722	0.0703901	1.15623	3.41	4.58	0.57	100
65	509.815	6303.68	0.502427	0.0279111	0.159326	0.310337	0.0526289	0.947371	0.5026	0.0279	0.1593	0.3102	0.0525919	0.947408	60.7128	19.7918	5.43356	3.96696	0.0688829	1.15334	3.41	4.58	0.57	100
66	510.656	6329.55	0.506071	0.0282906	0.156083	0.309555	0.0529428	0.947057	0.506	0.0283	0.1561	0.3097	0.0529665	0.947033	60.7029	19.7852	5.4286	3.96669	0.067308	1.15027	3.41	4.58	0.57	100
67	511.402	6374.83	0.509361	0.0286082	0.152716	0.309315	0.0531783	0.946822	0.5095	0.0286	0.1527	0.3092	0.05315	0.94685	60.6919	19.7779	5.42302	3.96638	0.0655891	1.14686	3.41	4.58	0.57	100
68	512.273	6411.35	0.513183	0.0290008	0.149113	0.308704	0.0534889	0.946511	0.5132	0.029	0.1491	0.3087	0.0534858	0.946514	60.6805	19.7704	5.41726	3.96605	0.0638616	1.14337	3.41	4.58	0.57	100
69	513.172	6452.52	0.517146	0.0294075	0.145301	0.308145	0.0538053	0.946195	0.5172	0.0294	0.1453	0.3081	0.053787	0.946213	60.6681	19.7621	5.41088	3.96569	0.0620078	1.13953	3.41	4.58	0.57	100
70	514.071	6501.47	0.521145	0.029812	0.141301	0.307742	0.0541094	0.945891	0.5213	0.0298	0.1413	0.3076	0.0540737	0.945926	60.6548	19.7532	5.404	3.9653	0.060074	1.13543	3.41	4.58	0.57	100
71	515.095	6540.42	0.525675	0.0302968	0.13708	0.306947	0.0544934	0.945507	0.5256	0.0303	0.1371	0.307	0.0545062	0.945494	60.6407	19.7438	5.39664	3.96488	0.0580778	1.13108	3.41	4.58	0.57	100
72	516.115	6582.34	0.530208	0.030784	0.132787	0.30622	0.0548742	0.945126	0.5301	0.0308	0.1328	0.3064	0.0549117	0.945088	60.6253	19.7336	5.38858	3.96441	0.0559762	1.12637	3.41	4.58	0.57	100
73	517.171	6632.25	0.534935	0.0312899	0.128177	0.305598	0.0552606	0.944739	0.5348	0.0313	0.1282	0.3057	0.0552906	0.944709	60.6095	19.723	5.38017	3.96393	0.0538694	1.12152	3.41	4.58	0.57	100
74	518.215	6686.14	0.539636	0.0317934	0.123496	0.305075	0.0556384	0.944362	0.5396	0.0318	0.1235	0.3051	0.0556528	0.944347	60.5921	19.7114	5.37088	3.96338	0.0516434	1.11621	3.41	4.58	0.57	100
75	519.288	6743.28	0.544489	0.0323182	0.118623	0.30457	0.0560295	0.943971	0.5447	0.0323	0.1186	0.3044	0.0559792	0.944021	60.5741	19.6994	5.36115	3.96281	0.0494183	1.11071	3.41	4.58	0.57	100
76	520.453	6795.67	0.54974	0.0329081	0.113518	0.303833	0.0564803	0.94352	0.5498	0.0329	0.1135	0.3037	0.0564613	0.943539	60.5548	19.6866	5.35066	3.96219	0.047133	1.10484	3.41	4.58	0.57	100
77	521.614	6848.02	0.554986	0.0335072	0.108405	0.303102	0.0569373	0.943063	0.5551	0.0335	0.1084	0.303	0.0569147	0.943085	60.534	19.6726	5.33919	3.9615	0.0447639	1.0985	3.41	4.58	0.57	100
78	522.792	6909.73	0.560342	0.0341176	0.10301	0.302531	0.0573927	0.942607	0.5605	0.0341	0.103	0.3023	0.0573495	0.942651	60.5124	19.6582	5.32721	3.96078	0.0424242	1.09196	3.41	4.58	0.57	100
79	524.039	6960.77	0.565968	0.0347919	0.0975936	0.301647	0.0579131	0.942087	0.5659	0.0348	0.0976	0.3017	0.0579324	0.942068	60.4888	19.6425	5.31401	3.95997	0.0399979	1.08484	3.41	4.58	0.57	100
80	525.165	7033.07	0.571146	0.0353872	0.0921108	0.301356	0.0583435	0.941657	0.5711	0.0354	0.0921	0.3014	0.0583677	0.941632	60.4641	19.6261	5.30004	3.95911	0.0375879	1.07739	3.41	4.58	0.57	100
81	526.306	7108.34	0.576397	0.0360013	0.0865033	0.301099	0.0587874	0.941213	0.5764	0.036	0.0865	0.3011	0.0587851	0.941215	60.4382	19.6088	5.28523	3.9582	0.0352004	1.06958	3.41	4.58	0.57	100
82	527.424	7186.79	0.581555	0.0366121	0.0809002	0.300933	0.0592269	0.940773	0.5817	0.0366	0.0809	0.3008	0.0591946	0.940805	60.4104	19.5903	5.2692	3.95719	0.0327934	1.0612	3.41	4.58	0.57	100
83	528.615	7254.11	0.586966	0.0372932	0.0752979	0.300443	0.0597399	0.94026	0.5869	0.0373	0.0753	0.3005	0.0597565	0.940244	60.3811	19.5707	5.25216	3.95612	0.0304237	1.05238	3.41	4.58	0.57	100
84	528.983	7278.3	0.588655	0.0375035	0.0734855	0.300356	0.0598945	0.940105	0.5886	0.0375	0.0735	0.3004	0.0598946	0.940105	60.35	19.55	5.2339	3.95496	0.0280818	1.04304	3.41	4.58	0.57	100
85	528.752	7277.64	0.589447	0.0372041	0.0725821	0.300767	0.0593698	0.94063	0.5895	0.0374	0.0727	0.3005	0.0596586	0.940341	60.3398	19.5432	5.22791	3.95458	0.027333	1.03998	3.41	4.58	0.57	100
86	529.01	7286.3	0.590316	0.0373275	0.0717055	0.300651	0.0594725	0.940528	0.5905	0.0373	0.0717	0.3005	0.0594138	0.940586	60.2936	19.5124	5.20068	3.95286	0.0239805	1.02609	3.41	4.58	0.57	100
87	531.21	7423.18	0.594583	0.0378996	0.0653017	0.302216	0.059922	0.940078	0.5946	0.0379	0.0653	0.3022	0.0599209	0.940079	60.2735	19.499	5.18875	3.95211	0.0225863	1.02001	3.41	4.58	0.57	100
88	533.489	7568.69	0.598876	0.0384953	0.0586994	0.303929	0.060397	0.939603	0.5989	0.0385	0.0587	0.304	0.0604016	0.939598	60.2389	19.4759	5.16817	3.95079	0.0203889	1.00956	3.41	4.58	0.57	100
89	536.576	7949.96	0.597137	0.038048	0.0516007	0.313214	0.0599007	0.940099	0.603	0.0391	0.0524	0.3056	0.0608939	0.939106	60.1947	19.4464	5.1417	3.94909	0.0178798	0.995988	3.41	4.58	0.57	100
90	537.719	7839.05	0.606836	0.0396934	0.0464993	0.306972	0.0613946	0.938605	0.6068	0.0397	0.0465	0.307	0.0614076	0.938592	60.1794	19.4363	5.13258	3.94851	0.0170916	0.991203	3.41	4.58	0.57	100
91	540.435	8250.07	0.602891	0.0389016	0.0405229	0.317684	0.0606139	0.939386	0.6103	0.0402	0.0411	0.3083	0.0617986	0.938201	60.1122	19.3914	5.09185	3.94586	0.0140419	0.970424	3.41	4.58	0.57	100
92	541.443	8082.62	0.613474	0.0408195	0.0360006	0.309706	0.0623872	0.937613	0.6136	0.0408	0.036	0.3096	0.0623472	0.937653	60.0742	19.3662	5.06887	3.94436	0.0125516	0.95846	3.41	4.58	0.57	100
93	542.893	8074.65	0.619912	0.0420652	0.0311635	0.30686	0.0635449	0.936455	0.6166	0.0414	0.0314	0.3107	0.0629179	0.937082	60.0502	19.3501	5.05411	3.94338	0.0116852	0.951006	3.41	4.58	0.57	100
94	544.737	8289.21	0.619235	0.0419935	0.0271007	0.311671	0.0635084	0.936492	0.6192	0.042	0.0271	0.3117	0.0635209	0.936479	59.9751	19.3	5.00755	3.94022	0.00938787	0.927904	3.41	4.58	0.57	100
95	546.089	8318.24	0.623395	0.0429214	0.0232934	0.31039	0.0644159	0.935584	0.6216	0.0425	0.0233	0.3126	0.0639964	0.936004	59.951	19.284	4.99268	3.93921	0.0087369	0.920418	3.41	4.58	0.57	100
96	547.675	8479.61	0.623537	0.0431043	0.0198007	0.313558	0.064659	0.935341	0.6236	0.0431	0.0198	0.3135	0.0646468	0.935353	59.8702	19.2301	4.94225	3.93574	0.00689848	0.895269	3.41	4.58	0.57	100
97	549.004	8568.26	0.625094	0.0436309	0.0168021	0.314473	0.0652449	0.934755	0.6254	0.0436	0.0168	0.3143	0.0651719	0.934828	59.842	19.2113	4.9247	3.93452	0.00634138	0.886447	3.41	4.58	0.57	100
98	550.277	8646.54	0.626598	0.0442111	0.0141009	0.31509	0.0659071	0.934093	0.6268	0.0442	0.0141	0.315	0.0658718	0.934128	59.7838	19.1726	4.88833	3.93199	0.00536377	0.86815	3.41	4.58	0.57	100
99	551.444	8672.69	0.629218	0.0450985	0.0116776	0.314006	0.0668804	0.93312	0.6279	0.0447	0.0117	0.3157	0.0664585	0.933541	59.7215	19.131	4.84927	3.92923	0.00448478	0.848508	3.41	4.58	0.57	100
100	552.733	8807.9	0.628456	0.0453405	0.00960022	0.316603	0.0672911	0.932709	0.6288	0.0453	0.0096	0.3163	0.0672007	0.932799	59.6535	19.0857	4.80651	3.92616	0.00369114	0.827167	3.41	4.58	0.57	100
101	553.833	8882.82	0.62888	0.0458678	0.00790144	0.31735	0.0679777	0.932022	0.6294	0.0458	0.0079	0.3169	0.0678318	0.932168	59.5848	19.0399	4.76332	3.92305	0.00303131	0.805407	3.41	4.58	0.57	100
102	554.94	8953.09	0.629231	0.0464604	0.00640084	0.317908	0.0687598	0.93124	0.6298	0.0464	0.0064	0.3175	0.0686188	0.931381	59.5158	18.9939	4.71995	3.91989	0.00248642	0.783522	3.41	4.58	0.57	100
103	554.54	9204.89	0.623246	0.0442628	0.00509717	0.327394	0.0663103	0.93369	0.6299	0.0469	0.0051	0.318	0.0692967	0.930703	59.4408	18.9439	4.67276	3.9164	0.00200635	0.759679	3.41	4.58	0.57	100
104	556.925	9084.56	0.629402	0.0475305	0.00400012	0.319067	0.0702145	0.929786	0.6299	0.0475	0.004	0.3185	0.0701211	0.929879	59.3167	18.8611	4.59535	3.9109	0.00137331	0.719018	3.41	4.58	0.57	100
105	557.358	9063.1	0.630583	0.0481497	0.00370754	0.317559	0.0709405	0.929059	0.6299	0.0477	0.0037	0.3187	0.0703955	0.929604	59.28	18.8367	4.57228	3.90916	0.0012267	0.707325	3.41	4.58	0.57	100
106	557.902	9038.14	0.632133	0.0489168	0.00321514	0.315735	0.0718256	0.928174	0.6303	0.0477	0.0032	0.3187	0.070354	0.929646	59.259	18.8227	4.55907	3.90815	0.00114901	0.70067	3.41	4.58	0.57	100
107	557.33	9094.31	0.630874	0.0477982	0.00260071	0.318727	0.070429	0.929571	0.6308	0.0478	0.0026	0.3188	0.0704391	0.929561	59.21	18.79	4.5281	3.90576	0.001	0.6852	3.41	4.58	0.57	100
108	557.412	9101.93	0.631247	0.0477947	0.00210007	0.318859	0.0703856	0.929614	0.6313	0.0478	0.0021	0.3189	0.0703873	0.929613	59.0922	18.7114	4.45373	3.90012	0.001	0.647628	3.41	4.58	0.57	100
109	557.5	9109.36	0.63	0.0479	0.0031	0.3189	0.0707	0.9293	0.6317	0.0478	0.0016	0.3189	0.0703	0.9297	58.8229	18.5319	4.2837	3.8873	0.001	0.5618	3.41	4.58	0.57	100
110	557.59	9113.86	0.6301	0.048	0.003	0.3189	0.0708	0.9292	0.632	0.0478	0.0012	0.319	0.0703	0.9297	58.6797	18.4365	4.1935	3.8804	0.0006	0.5161	3.41	4.58	0.57	100
111	557.66	9118.22	0.6299	0.048	0.0031	0.319	0.0709	0.9291	0.6323	0.0479	0.0008	0.319	0.0704	0.9296	58.6697	18.4298	4.1872	3.8799	0.0006	0.5129	3.41	4.58	0.57	100
112	557.69	9120.22	0.6298	0.0481	0.0031	0.319	0.0709	0.9291	0.6324	0.0479	0.0007	0.319	0.0704	0.9296	58.6632	18.4255	4.1831	3.8796	0.0006	0.5108	3.41	4.58	0.57	100
113	558.61	9178.98	0.6296	0.0486	0.0023	0.3194	0.0717	0.9283	0.6316	0.0485	0.0005	0.3195	0.0713	0.9287	58.6271	18.4015	4.1604	3.8779	0.0005	0.4993	3.41	4.58	0.57	100
114	559.76	9252.7	0.6292	0.0494	0.0015	0.32	0.0728	0.9272	0.6305	0.0493	0.0002	0.32	0.0725	0.9275	58.5481	18.3488	4.1106	3.874	0.0003	0.474	3.41	4.58	0.57	100
115	560.96	9328.12	0.6285	0.0502	0.0008	0.3205	0.0739	0.9261	0.6293	0.0501	0.0001	0.3205	0.0737	0.9263	58.455	18.2867	4.052	3.8694	0.0002	0.4442	3.41	4.58	0.57	100
116	562.21	9406.23	0.6275	0.0511	0.0005	0.3209	0.0753	0.9247	0.628	0.051	0	0.3209	0.0751	0.9249	58.349	18.216	3.9854	3.8641	0.0001	0.4102	3.41	4.58	0.57	100
117	563.2	9467.91	0.6266	0.0518	0.0003	0.3213	0.0763	0.9237	0.6269	0.0517	0	0.3213	0.0762	0.9238	58.2534	18.1523	3.9254	3.8592	0.0001	0.3795	3.41	4.58	0.57	100
118	564.24	9533.03	0.6255	0.0526	0.0003	0.3217	0.0775	0.9225	0.6258	0.0525	0	0.3217	0.0774	0.9226	58.1617	18.0912	3.868	3.8544	0.0001	0.35	3.41	4.58	0.57	100

## Sheet: B5-1_d
No.	T(C)	P(bars)	Xalm	Xprp	Xsps	Xgrs	Mg#	Fe#	obs_Xalm	obs_Xprp	obs_Xsps	obs_Xgrs	obs_Mg#	obs_Fe#	blk_Si	blk_Al	blk_Fe	blk_Mg	blk_Mn	blk_Ca	blk_Na	blk_K	blk_Ti	blk_H
1	500.374	5858.73	0.462251	0.0241939	0.200356	0.313199	0.0497361	0.950264	0.4622	0.0242	0.2004	0.3132	0.0497533	0.950247	60.83	19.87	5.49	3.97	0.09	1.19	3.41	4.58	0.57	100
2	500.415	5859.01	0.462421	0.0242149	0.200347	0.313017	0.0497598	0.95024	0.4622	0.0242	0.2004	0.3132	0.0497533	0.950247	60.8295	19.8697	5.48979	3.96999	0.0899071	1.18985	3.41	4.58	0.57	100
3	500.421	5860.12	0.462445	0.0242136	0.200225	0.313116	0.0497547	0.950245	0.4622	0.0242	0.2004	0.3132	0.0497533	0.950247	60.8294	19.8696	5.48972	3.96999	0.0898792	1.18981	3.41	4.58	0.57	100
4	500.428	5861.97	0.462476	0.0242101	0.200022	0.313292	0.0497448	0.950255	0.4622	0.0242	0.2004	0.3132	0.0497533	0.950247	60.8291	19.8694	5.48959	3.96998	0.0898213	1.18972	3.41	4.58	0.57	100
5	500.465	5863.5	0.46263	0.024224	0.19987	0.313276	0.0497562	0.950244	0.4622	0.0242	0.2004	0.3132	0.0497533	0.950247	60.8286	19.8691	5.48937	3.96997	0.0897266	1.18957	3.41	4.58	0.57	100
6	500.492	5863.82	0.462742	0.0242373	0.199848	0.313172	0.0497707	0.950229	0.4622	0.0242	0.2004	0.3132	0.0497533	0.950247	60.8282	19.8688	5.48916	3.96996	0.0896373	1.18943	3.41	4.58	0.57	100
7	500.483	5864.61	0.462702	0.0242288	0.199755	0.313315	0.0497583	0.950242	0.4623	0.0242	0.2004	0.3132	0.0497431	0.950257	60.8281	19.8687	5.4891	3.96995	0.0896118	1.18939	3.41	4.58	0.57	100
8	500.51	5864.93	0.462814	0.0242422	0.199732	0.313211	0.0497729	0.950227	0.4623	0.0242	0.2003	0.3132	0.0497431	0.950257	60.8279	19.8686	5.48902	3.96995	0.0895758	1.18934	3.41	4.58	0.57	100
9	500.528	5865.54	0.462889	0.0242495	0.199674	0.313188	0.0497794	0.950221	0.4623	0.0242	0.2003	0.3132	0.0497431	0.950257	60.8278	19.8685	5.48896	3.96995	0.0895503	1.1893	3.41	4.58	0.57	100
10	500.546	5866.15	0.462964	0.0242568	0.199615	0.313165	0.049786	0.950214	0.4623	0.0242	0.2003	0.3132	0.0497431	0.950257	60.8276	19.8684	5.48888	3.96994	0.0895136	1.18924	3.41	4.58	0.57	100
11	500.557	5867.3	0.463011	0.0242582	0.199492	0.313239	0.0497841	0.950216	0.4624	0.0242	0.2003	0.3132	0.0497328	0.950267	60.8274	19.8683	5.48879	3.96994	0.089477	1.18918	3.41	4.58	0.57	100
12	500.528	5868.56	0.462889	0.0242373	0.199335	0.313538	0.0497557	0.950244	0.4624	0.0242	0.2002	0.3132	0.0497328	0.950267	60.8271	19.8681	5.48865	3.96993	0.0894156	1.18908	3.41	4.58	0.57	100
13	500.55	5869.23	0.462982	0.0242467	0.199272	0.313499	0.0497645	0.950235	0.4624	0.0242	0.2002	0.3132	0.0497328	0.950267	60.8268	19.8679	5.48852	3.96992	0.0893626	1.189	3.41	4.58	0.57	100
14	500.549	5869.32	0.462976	0.0242456	0.199261	0.313517	0.0497629	0.950237	0.4625	0.0242	0.2001	0.3132	0.0497226	0.950277	60.8266	19.8677	5.48843	3.96992	0.0893215	1.18894	3.41	4.58	0.57	100
15	500.547	5869.41	0.462971	0.0242444	0.19925	0.313535	0.0497612	0.950239	0.4625	0.0242	0.2001	0.3132	0.0497226	0.950277	60.8266	19.8677	5.48842	3.96992	0.0893176	1.18893	3.41	4.58	0.57	100
16	500.546	5869.5	0.462964	0.0242433	0.19924	0.313553	0.0497597	0.95024	0.4626	0.0242	0.2	0.3132	0.0497124	0.950288	60.8266	19.8677	5.48841	3.96992	0.0893135	1.18892	3.41	4.58	0.57	100
17	500.559	5870.24	0.463021	0.0242477	0.199163	0.313568	0.0497624	0.950238	0.4627	0.0242	0.1999	0.3132	0.0497022	0.950298	60.8265	19.8677	5.4884	3.96992	0.0893097	1.18892	3.41	4.58	0.57	100
18	500.558	5870.33	0.463015	0.0242465	0.199153	0.313586	0.0497608	0.950239	0.4627	0.0242	0.1999	0.3132	0.0497022	0.950298	60.8263	19.8676	5.4883	3.96991	0.0892678	1.18885	3.41	4.58	0.57	100
19	500.557	5870.42	0.463009	0.0242454	0.199142	0.313604	0.0497592	0.950241	0.4628	0.0242	0.1998	0.3132	0.049692	0.950308	60.8263	19.8675	5.4883	3.96991	0.0892639	1.18885	3.41	4.58	0.57	100
20	500.555	5870.51	0.463003	0.0242442	0.199131	0.313622	0.0497576	0.950242	0.4629	0.0242	0.1997	0.3132	0.0496818	0.950318	60.8263	19.8675	5.48829	3.96991	0.08926	1.18884	3.41	4.58	0.57	100
21	500.554	5870.6	0.462997	0.0242431	0.19912	0.31364	0.049756	0.950244	0.463	0.0242	0.1996	0.3132	0.0496716	0.950328	60.8263	19.8675	5.48828	3.96991	0.089256	1.18883	3.41	4.58	0.57	100
22	500.581	5870.93	0.463109	0.0242564	0.199098	0.313536	0.0497705	0.950229	0.4631	0.0242	0.1994	0.3132	0.0496614	0.950339	60.8263	19.8675	5.48827	3.96991	0.0892521	1.18883	3.41	4.58	0.57	100
23	500.58	5871.79	0.463107	0.0242526	0.199	0.31364	0.0497633	0.950237	0.4632	0.0242	0.1993	0.3132	0.0496512	0.950349	60.8261	19.8674	5.48821	3.96991	0.0892265	1.18879	3.41	4.58	0.57	100
24	500.59	5872.58	0.463147	0.0242547	0.198917	0.31368	0.0497633	0.950237	0.4634	0.0243	0.1992	0.3132	0.0498257	0.950174	60.8259	19.8673	5.48811	3.9699	0.0891834	1.18872	3.41	4.58	0.57	100
25	500.6	5873.37	0.463188	0.0242569	0.198834	0.31372	0.0497633	0.950237	0.4635	0.0243	0.199	0.3132	0.0498155	0.950184	60.8257	19.8671	5.48801	3.9699	0.0891407	1.18865	3.41	4.58	0.57	100
26	500.699	5874.28	0.463599	0.0243067	0.198785	0.31331	0.0498185	0.950181	0.4637	0.0243	0.1988	0.3132	0.0497951	0.950205	60.8255	19.867	5.48791	3.96989	0.0890978	1.18858	3.41	4.58	0.57	100
27	500.717	5875	0.463676	0.0243139	0.198714	0.313296	0.0498246	0.950175	0.4639	0.0243	0.1986	0.3132	0.0497747	0.950225	60.8251	19.8667	5.48772	3.96988	0.0890186	1.18846	3.41	4.58	0.57	100
28	500.738	5876.9	0.463763	0.0243176	0.198511	0.313408	0.0498229	0.950177	0.4641	0.0243	0.1984	0.3132	0.0497543	0.950246	60.8249	19.8666	5.48763	3.96988	0.0889765	1.18839	3.41	4.58	0.57	100
29	500.795	5880.37	0.463999	0.0243343	0.198153	0.313514	0.0498314	0.950169	0.4643	0.0243	0.1981	0.3132	0.0497339	0.950266	60.8244	19.8662	5.48739	3.96986	0.0888741	1.18823	3.41	4.58	0.57	100
30	500.811	5882.28	0.464066	0.0243353	0.197947	0.313652	0.0498265	0.950173	0.4645	0.0243	0.1979	0.3133	0.0497136	0.950286	60.8234	19.8656	5.48694	3.96984	0.088682	1.18793	3.41	4.58	0.57	100
31	500.847	5885.14	0.464215	0.0243433	0.197644	0.313797	0.0498267	0.950173	0.4648	0.0243	0.1976	0.3133	0.0496831	0.950317	60.8229	19.8653	5.4867	3.96983	0.0885812	1.18777	3.41	4.58	0.57	100
32	501.001	5889.03	0.464856	0.0244112	0.197289	0.313444	0.0498934	0.950107	0.4651	0.0244	0.1973	0.3133	0.0498468	0.950153	60.8221	19.8647	5.48634	3.96981	0.0884259	1.18752	3.41	4.58	0.57	100
33	501.058	5892.5	0.465091	0.0244279	0.196929	0.313551	0.0499019	0.950098	0.4654	0.0244	0.1969	0.3133	0.0498163	0.950184	60.8208	19.8639	5.48576	3.96978	0.0881799	1.18713	3.41	4.58	0.57	100
34	501.094	5895.38	0.465242	0.0244359	0.196626	0.313697	0.0499021	0.950098	0.4657	0.0244	0.1966	0.3133	0.0497858	0.950214	60.8199	19.8632	5.4853	3.96975	0.0879878	1.18682	3.41	4.58	0.57	100
35	501.143	5899.31	0.465448	0.024447	0.196211	0.313894	0.0499025	0.950097	0.4661	0.0244	0.1961	0.3133	0.0497452	0.950255	60.8191	19.8627	5.48493	3.96973	0.0878325	1.18658	3.41	4.58	0.57	100
36	501.322	5904.41	0.466193	0.0245239	0.195732	0.313551	0.0499756	0.950024	0.4665	0.0245	0.1957	0.3133	0.0498982	0.950102	60.818	19.862	5.48443	3.96971	0.0876198	1.18624	3.41	4.58	0.57	100
37	501.387	5908.38	0.466463	0.0245431	0.19532	0.313674	0.0499854	0.950015	0.467	0.0245	0.1952	0.3133	0.0498474	0.950153	60.8164	19.8609	5.48368	3.96967	0.0873058	1.18573	3.41	4.58	0.57	100
38	501.456	5912.54	0.466749	0.0245638	0.194889	0.313798	0.0499962	0.950004	0.4675	0.0245	0.1947	0.3133	0.0497967	0.950203	60.8153	19.8602	5.48316	3.96964	0.0870865	1.18538	3.41	4.58	0.57	100
39	501.631	5919.95	0.467483	0.0246299	0.194148	0.313739	0.0500493	0.949951	0.468	0.0246	0.1941	0.3134	0.0499391	0.950061	60.8141	19.8594	5.48261	3.96961	0.0868571	1.18501	3.41	4.58	0.57	100
40	501.696	5924.65	0.467753	0.0246461	0.193654	0.313947	0.0500532	0.949947	0.4686	0.0246	0.1935	0.3134	0.0498783	0.950122	60.8119	19.8579	5.48158	3.96956	0.08643	1.18432	3.41	4.58	0.57	100
41	501.953	5933.37	0.468825	0.0247516	0.192806	0.313617	0.0501474	0.949853	0.4692	0.0247	0.1928	0.3134	0.0500101	0.94999	60.8106	19.8571	5.48097	3.96953	0.0861753	1.18391	3.41	4.58	0.57	100
42	501.995	5939.86	0.469002	0.0247485	0.192102	0.314147	0.0501234	0.949877	0.4699	0.0247	0.192	0.3134	0.0499393	0.950061	60.8079	19.8553	5.47971	3.96946	0.0856575	1.18307	3.41	4.58	0.57	100
43	502.22	5947.72	0.469944	0.0248404	0.191333	0.313882	0.0502046	0.949795	0.4706	0.0248	0.1912	0.3134	0.0500606	0.949939	60.8061	19.8541	5.47889	3.96942	0.0853225	1.18252	3.41	4.58	0.57	100
44	502.333	5955.88	0.470418	0.0248696	0.190476	0.314236	0.0502124	0.949788	0.4714	0.0248	0.1903	0.3135	0.0499798	0.95002	60.8037	19.8525	5.47775	3.96936	0.0848593	1.18176	3.41	4.58	0.57	100
45	502.563	5965.93	0.471383	0.0249559	0.189464	0.314197	0.0502799	0.94972	0.4722	0.0249	0.1894	0.3135	0.0500905	0.949909	60.8014	19.8509	5.47666	3.9693	0.0844191	1.18103	3.41	4.58	0.57	100
46	502.675	5973.69	0.471854	0.0249863	0.18865	0.314509	0.0502903	0.94971	0.4732	0.0249	0.1884	0.3135	0.04999	0.95001	60.7984	19.8489	5.47524	3.96922	0.0838477	1.18008	3.41	4.58	0.57	100
47	502.939	5985.54	0.472964	0.0250845	0.187453	0.314499	0.0503657	0.949634	0.4742	0.025	0.1872	0.3135	0.0500801	0.94992	60.7962	19.8475	5.47419	3.96917	0.0834287	1.17939	3.41	4.58	0.57	100
48	503.2	6005.69	0.474069	0.0251753	0.186151	0.314605	0.0504268	0.949573	0.4753	0.0251	0.186	0.3136	0.0501599	0.94984	60.7926	19.8451	5.47251	3.96908	0.0827598	1.17826	3.41	4.58	0.57	100
49	503.479	6027.55	0.475256	0.0252762	0.184851	0.314616	0.0504986	0.949501	0.4765	0.0252	0.1847	0.3136	0.0502292	0.949771	60.7888	19.8425	5.47069	3.96898	0.0820463	1.17706	3.41	4.58	0.57	100
50	503.758	6050.07	0.476447	0.0253768	0.183535	0.314641	0.0505692	0.949431	0.4778	0.0253	0.1834	0.3136	0.0502882	0.949712	60.7849	19.8399	5.46884	3.96888	0.0813251	1.17583	3.41	4.58	0.57	100
51	504.066	6076.47	0.477765	0.0254867	0.182047	0.314701	0.0506441	0.949356	0.4792	0.0254	0.1819	0.3136	0.0503369	0.949663	60.7809	19.8373	5.46695	3.96878	0.0805985	1.17458	3.41	4.58	0.57	100
52	504.38	6105.99	0.479118	0.0255971	0.180471	0.314814	0.0507159	0.949284	0.4807	0.0255	0.1803	0.3135	0.0503753	0.949625	60.7764	19.8343	5.46481	3.96867	0.079783	1.17318	3.41	4.58	0.57	100
53	504.718	6140.05	0.480582	0.0257143	0.178721	0.314982	0.050789	0.949211	0.4824	0.0256	0.1785	0.3134	0.0503937	0.949606	60.7717	19.8311	5.46254	3.96855	0.0789272	1.17168	3.41	4.58	0.57	100
54	504.972	6156.19	0.481673	0.0258122	0.177602	0.314913	0.050863	0.949137	0.4835	0.0257	0.1774	0.3134	0.0504713	0.949529	60.7664	19.8276	5.46	3.96841	0.0779844	1.17002	3.41	4.58	0.57	100
55	505.254	6176.21	0.48289	0.0259195	0.176312	0.314879	0.0509413	0.949059	0.4848	0.0258	0.1761	0.3133	0.0505288	0.949471	60.7629	19.8253	5.45833	3.96832	0.0773671	1.16893	3.41	4.58	0.57	100
56	505.743	6200.17	0.484983	0.0261164	0.174301	0.3146	0.0510985	0.948902	0.4868	0.026	0.1741	0.3131	0.050702	0.949298	60.7589	19.8226	5.4564	3.96822	0.076662	1.16767	3.41	4.58	0.57	100
57	506.236	6227.89	0.487108	0.0263133	0.172188	0.314391	0.0512509	0.948749	0.4889	0.0262	0.172	0.3129	0.0508639	0.949136	60.7526	19.8184	5.4533	3.96805	0.0755484	1.16566	3.41	4.58	0.57	100
58	506.761	6259.42	0.48938	0.0265225	0.169887	0.31421	0.05141	0.94859	0.4913	0.0264	0.1697	0.3126	0.0509948	0.949005	60.7458	19.8139	5.45003	3.96787	0.0743927	1.16355	3.41	4.58	0.57	100
59	507.295	6292.93	0.4917	0.0267355	0.167509	0.314056	0.0515696	0.94843	0.4938	0.0266	0.1673	0.3123	0.0511145	0.948885	60.7385	19.809	5.44644	3.96768	0.0731465	1.16124	3.41	4.58	0.57	100
60	507.838	6329.49	0.494075	0.0269518	0.165026	0.313948	0.0517283	0.948272	0.4964	0.0268	0.1648	0.312	0.0512232	0.948777	60.7309	19.8039	5.44269	3.96748	0.0718691	1.15885	3.41	4.58	0.57	100
61	508.519	6356.05	0.497018	0.0272439	0.162316	0.313422	0.0519662	0.948034	0.4992	0.0271	0.1621	0.3116	0.0514915	0.948508	60.7229	19.7986	5.43874	3.96726	0.0705486	1.15633	3.41	4.58	0.57	100
62	509.105	6403.13	0.499617	0.0274745	0.159449	0.313459	0.0521248	0.947875	0.5022	0.0273	0.1592	0.3113	0.0515581	0.948442	60.7139	19.7926	5.43426	3.96701	0.0690874	1.15351	3.41	4.58	0.57	100
63	509.808	6439.07	0.502699	0.027774	0.156439	0.313087	0.052357	0.947643	0.5053	0.0276	0.1562	0.3109	0.0517921	0.948208	60.7045	19.7864	5.42959	3.96676	0.0675976	1.15058	3.41	4.58	0.57	100
64	510.541	6478.57	0.505926	0.0280873	0.153245	0.312742	0.0525966	0.947403	0.5086	0.0279	0.153	0.3104	0.0520037	0.947996	60.6944	19.7796	5.42451	3.96648	0.0660169	1.14742	3.41	4.58	0.57	100
65	511.383	6508.15	0.509606	0.0284669	0.149899	0.312028	0.0529053	0.947095	0.5121	0.0283	0.1497	0.31	0.0523686	0.947631	60.6836	19.7724	5.41904	3.96617	0.0643574	1.14403	3.41	4.58	0.57	100
66	512.136	6555.4	0.512964	0.0287903	0.146439	0.311807	0.0531428	0.946857	0.5157	0.0286	0.1462	0.3095	0.0525446	0.947455	60.672	19.7646	5.41311	3.96584	0.062614	1.14041	3.41	4.58	0.57	100
67	513	6593.07	0.516785	0.0291822	0.14281	0.311223	0.0534504	0.94655	0.5194	0.029	0.1426	0.309	0.0528811	0.947119	60.66	19.7567	5.40697	3.9655	0.0608612	1.13667	3.41	4.58	0.57	100
68	513.877	6632.24	0.520679	0.0295842	0.139087	0.310649	0.0537638	0.946236	0.5233	0.0294	0.1389	0.3085	0.0531934	0.946807	60.6471	19.7481	5.40031	3.96512	0.0590204	1.13266	3.41	4.58	0.57	100
69	514.762	6677.89	0.524638	0.0299894	0.135178	0.310194	0.0540711	0.945929	0.5273	0.0298	0.135	0.308	0.0534913	0.946509	60.6337	19.7391	5.39332	3.96472	0.0571543	1.12849	3.41	4.58	0.57	100
70	515.66	6724.17	0.528673	0.0304066	0.131191	0.30973	0.0543869	0.945613	0.5314	0.0302	0.131	0.3074	0.0537749	0.946225	60.6194	19.7296	5.38583	3.9643	0.0552242	1.12406	3.41	4.58	0.57	100
71	516.659	6760.75	0.533122	0.0308916	0.127065	0.308922	0.0547711	0.945229	0.5356	0.0307	0.1269	0.3068	0.0542115	0.945788	60.6046	19.7197	5.37798	3.96384	0.0532773	1.11947	3.41	4.58	0.57	100
72	517.558	6814.26	0.537208	0.0313149	0.122877	0.3086	0.0550811	0.944919	0.54	0.0311	0.1227	0.3062	0.0544563	0.945544	60.5888	19.7092	5.36957	3.96336	0.0512709	1.11459	3.41	4.58	0.57	100
73	518.559	6856.84	0.54171	0.0318096	0.118571	0.307909	0.0554639	0.944536	0.5443	0.0316	0.1184	0.3056	0.0548706	0.945129	60.5726	19.6984	5.36086	3.96285	0.0492806	1.10959	3.41	4.58	0.57	100
74	519.646	6887.16	0.546555	0.0323715	0.114225	0.306848	0.0559164	0.944084	0.5488	0.0322	0.1141	0.305	0.0554217	0.944578	60.5554	19.6869	5.35156	3.9623	0.0472437	1.1043	3.41	4.58	0.57	100
75	520.65	6932.05	0.551096	0.0328825	0.10982	0.306201	0.0563077	0.943692	0.5533	0.0327	0.1097	0.3043	0.055802	0.944198	60.5375	19.675	5.34178	3.96172	0.0452002	1.09881	3.41	4.58	0.57	100
76	521.632	6979.4	0.555559	0.0333872	0.105419	0.305635	0.0566897	0.94331	0.5577	0.0332	0.1053	0.3037	0.0561855	0.943815	60.519	19.6627	5.3316	3.96112	0.0431704	1.09315	3.41	4.58	0.57	100
77	522.695	7015.41	0.56033	0.0339568	0.100983	0.30473	0.0571387	0.942861	0.5622	0.0338	0.1009	0.3032	0.0567114	0.943289	60.5001	19.65	5.32105	3.96048	0.0411699	1.08735	3.41	4.58	0.57	100
78	523.99	7004.53	0.565942	0.0347183	0.0967712	0.302568	0.0578001	0.9422	0.5665	0.0344	0.0964	0.3027	0.0572475	0.942753	60.4802	19.6368	5.30995	3.95981	0.0391688	1.08131	3.41	4.58	0.57	100
79	524.695	7107.23	0.569416	0.0350346	0.0920573	0.303492	0.057961	0.942039	0.5708	0.0349	0.092	0.3022	0.0576193	0.942381	60.4605	19.6237	5.29877	3.95912	0.0372575	1.07534	3.41	4.58	0.57	100
80	525.7	7149.94	0.57396	0.0355929	0.0876407	0.302806	0.0583918	0.941608	0.575	0.0355	0.0876	0.3019	0.0581491	0.941851	60.4385	19.609	5.28625	3.95835	0.0352328	1.06866	3.41	4.58	0.57	100
81	526.6	7204.04	0.578091	0.036087	0.0833255	0.302496	0.0587565	0.941244	0.579	0.036	0.0833	0.3017	0.0585366	0.941463	60.4167	19.5944	5.27372	3.95758	0.0333192	1.06205	3.41	4.58	0.57	100
82	527.515	7254.65	0.582266	0.0366021	0.0790367	0.302096	0.0591436	0.940856	0.5828	0.0365	0.079	0.3016	0.0589375	0.941062	60.3946	19.5797	5.26095	3.95678	0.031479	1.05537	3.41	4.58	0.57	100
83	528.201	7272.28	0.587008	0.0368332	0.0746032	0.301555	0.0590425	0.940958	0.5864	0.037	0.0748	0.3018	0.0593519	0.940648	60.3717	19.5645	5.24761	3.95594	0.0296687	1.04845	3.41	4.58	0.57	100
84	528.803	7293.8	0.588978	0.0371096	0.0725765	0.301336	0.0592722	0.940728	0.5881	0.0372	0.0726	0.302	0.0594914	0.940509	60.3054	19.5203	5.20871	3.9535	0.0247248	1.02847	3.41	4.58	0.57	100
85	529.241	7289.97	0.591378	0.0374654	0.0707758	0.300381	0.0595782	0.940422	0.5898	0.0375	0.0704	0.3023	0.05978	0.94022	60.2955	19.5137	5.20287	3.95313	0.0240053	1.02548	3.41	4.58	0.57	100
86	530.643	7393.89	0.593267	0.0376973	0.0669755	0.302061	0.0597455	0.940254	0.5923	0.0378	0.067	0.3028	0.0599905	0.94001	60.2861	19.5074	5.1973	3.95278	0.0233379	1.02265	3.41	4.58	0.57	100
87	531.731	7452.32	0.595835	0.0380593	0.0636579	0.302448	0.0600405	0.93996	0.5946	0.0382	0.0637	0.3035	0.0603666	0.939633	60.2673	19.4949	5.18615	3.95207	0.0220799	1.01697	3.41	4.58	0.57	100
88	532.99	7521.18	0.598737	0.0384773	0.0598485	0.302937	0.0603836	0.939616	0.5969	0.0387	0.0599	0.3045	0.0608874	0.939113	60.2494	19.4829	5.17551	3.95139	0.0209428	1.01157	3.41	4.58	0.57	100
89	534.263	7600.43	0.601215	0.0388348	0.056148	0.303802	0.0606747	0.939325	0.599	0.0391	0.0562	0.3057	0.0612757	0.938724	60.2277	19.4685	5.16251	3.95056	0.0196431	1.00499	3.41	4.58	0.57	100
90	536.725	8008.81	0.595605	0.0377603	0.0514644	0.31517	0.0596185	0.940382	0.6009	0.0396	0.0526	0.3069	0.0618267	0.938173	60.1953	19.4469	5.14306	3.9493	0.0178454	0.995092	3.41	4.58	0.57	100
91	536.658	7735.96	0.606478	0.0396411	0.0490258	0.304855	0.0613527	0.938647	0.6027	0.0401	0.0491	0.3081	0.0623833	0.937617	60.1808	19.4372	5.13441	3.94875	0.0170979	0.990515	3.41	4.58	0.57	100
92	538.935	8159.47	0.599783	0.0383789	0.0448975	0.31694	0.0601397	0.93986	0.6043	0.0406	0.0459	0.3093	0.0629555	0.937044	60.1484	19.4156	5.11484	3.94748	0.0155304	0.980599	3.41	4.58	0.57	100
93	538.85	7861.57	0.61114	0.0404028	0.0426162	0.305842	0.062011	0.937989	0.6058	0.0411	0.0427	0.3104	0.0635338	0.936466	60.1336	19.4058	5.10595	3.94691	0.0148651	0.975902	3.41	4.58	0.57	100
94	539.869	7913.15	0.613541	0.0408214	0.0396108	0.306027	0.0623835	0.937617	0.6073	0.0416	0.0397	0.3114	0.0641085	0.935892	60.1096	19.3897	5.09127	3.94594	0.0138411	0.968554	3.41	4.58	0.57	100
95	540.849	7958.42	0.615988	0.041266	0.0367115	0.306034	0.0627854	0.937215	0.6086	0.0422	0.0368	0.3124	0.0648433	0.935157	60.0841	19.3728	5.07563	3.9449	0.0128319	0.960756	3.41	4.58	0.57	100
96	541.588	7954.37	0.619388	0.0419069	0.0341323	0.304572	0.063371	0.936629	0.61	0.0427	0.0341	0.3132	0.0654206	0.934579	60.0576	19.3551	5.05931	3.94381	0.011859	0.952646	3.41	4.58	0.57	100
97	542.328	7950.32	0.622759	0.0425646	0.031572	0.303105	0.0639758	0.936024	0.6112	0.0432	0.0315	0.3141	0.0660147	0.933985	60.0316	19.3378	5.04321	3.94272	0.010972	0.944731	3.41	4.58	0.57	100
98	543.062	7946.33	0.626056	0.0432328	0.0290645	0.301646	0.0645951	0.935405	0.6124	0.0438	0.0291	0.3148	0.0667479	0.933252	60.004	19.3193	5.02599	3.94154	0.0100987	0.936347	3.41	4.58	0.57	100
99	543.796	7942.34	0.629308	0.0439196	0.0265912	0.300181	0.0652374	0.934763	0.6135	0.0443	0.0267	0.3155	0.0673457	0.932654	59.9748	19.2999	5.00771	3.94028	0.00925029	0.927542	3.41	4.58	0.57	100
100	545.269	8173.56	0.625838	0.0433093	0.024427	0.306425	0.0647231	0.935277	0.6145	0.0448	0.0245	0.3161	0.0679509	0.932049	59.9436	19.279	4.98807	3.93891	0.00842024	0.918172	3.41	4.58	0.57	100
101	546.082	8213.33	0.627466	0.0437094	0.0223321	0.306493	0.0651236	0.934876	0.6156	0.0453	0.0224	0.3167	0.0685429	0.931457	59.9178	19.2619	4.97193	3.93779	0.00779031	0.910269	3.41	4.58	0.57	100
102	546.877	8251.1	0.629028	0.0441181	0.0203395	0.306514	0.0655401	0.93446	0.6166	0.0458	0.0204	0.3172	0.0691425	0.930857	59.8871	19.2414	4.95266	3.93645	0.00710435	0.900855	3.41	4.58	0.57	100
103	547.687	8297.18	0.630262	0.0444844	0.0184393	0.306814	0.0659276	0.934072	0.6176	0.0462	0.0185	0.3177	0.0695993	0.930401	59.8551	19.2201	4.93254	3.93504	0.00645377	0.891051	3.41	4.58	0.57	100
104	548.43	8337.76	0.631386	0.044842	0.0167494	0.307023	0.0663119	0.933688	0.6186	0.0466	0.0168	0.318	0.0700541	0.929946	59.8217	19.1978	4.91149	3.93355	0.00583799	0.880805	3.41	4.58	0.57	100
105	548.836	8361.16	0.631935	0.045031	0.0158543	0.30718	0.0665189	0.933481	0.6192	0.0468	0.0159	0.3182	0.0702703	0.92973	59.789	19.176	4.89088	3.93209	0.00529135	0.870785	3.41	4.58	0.57	100
106	549.276	8393.97	0.632236	0.045179	0.0149592	0.307625	0.0666933	0.933307	0.6197	0.0469	0.015	0.3184	0.070357	0.929643	59.7709	19.1639	4.87938	3.93127	0.00500289	0.865196	3.41	4.58	0.57	100
107	549.956	8407.87	0.633939	0.0457134	0.0134029	0.306945	0.06726	0.93274	0.6208	0.0472	0.0134	0.3186	0.0706587	0.929341	59.7517	19.1512	4.86729	3.9304	0.00471681	0.859313	3.41	4.58	0.57	100
108	550.924	8502.67	0.633603	0.0458823	0.0117713	0.308743	0.067525	0.932475	0.6219	0.0475	0.0118	0.3188	0.0709591	0.929041	59.714	19.126	4.84335	3.92868	0.00421067	0.847722	3.41	4.58	0.57	100
109	551.735	8563.44	0.633889	0.0461905	0.0103759	0.309545	0.0679194	0.932081	0.6229	0.0477	0.0104	0.319	0.0711303	0.92887	59.6703	19.0969	4.81567	3.92667	0.00369638	0.834233	3.41	4.58	0.57	100
110	552.601	8624.53	0.634201	0.0465646	0.00898174	0.310252	0.0684004	0.9316	0.6238	0.048	0.009	0.3192	0.0714498	0.92855	59.6275	19.0683	4.78856	3.9247	0.00325259	0.820993	3.41	4.58	0.57	100
111	553.55	8687.63	0.634516	0.0470242	0.00758466	0.310875	0.068997	0.931003	0.6246	0.0484	0.0076	0.3194	0.0719168	0.928083	59.5782	19.0354	4.75726	3.9224	0.0028093	0.80568	3.41	4.58	0.57	100
112	554.02	8671.71	0.636109	0.0476351	0.00678185	0.309474	0.069668	0.930332	0.6249	0.0487	0.0068	0.3196	0.0722981	0.927702	59.5197	18.9964	4.72014	3.91965	0.00236566	0.787497	3.41	4.58	0.57	100
113	554.852	8775.05	0.634692	0.0476783	0.00588966	0.31174	0.0698716	0.930128	0.6252	0.049	0.0059	0.3198	0.0726787	0.927321	59.4814	18.9709	4.69581	3.91783	0.00210626	0.77566	3.41	4.58	0.57	100
114	555.977	8846.81	0.634667	0.0483057	0.00469145	0.312336	0.0707286	0.929271	0.6256	0.0496	0.0047	0.3202	0.0734597	0.92654	59.4344	18.9396	4.666	3.91559	0.00182959	0.761016	3.41	4.58	0.57	100
115	557.402	8942.91	0.634154	0.0490994	0.00349399	0.313253	0.0718612	0.928139	0.6257	0.0503	0.0035	0.3205	0.0744083	0.925592	59.3539	18.8859	4.61487	3.9117	0.00145166	0.735855	3.41	4.58	0.57	100
116	559.241	8964.69	0.635905	0.0510077	0.002303	0.310784	0.0742564	0.925744	0.6258	0.051	0.0023	0.3209	0.0753546	0.924645	59.2463	18.8142	4.54665	3.90641	0.0010758	0.702157	3.41	4.58	0.57	100
117	558.519	9052.35	0.634364	0.0493445	0.0010991	0.315193	0.0721718	0.927828	0.6258	0.0518	0.0011	0.3213	0.0764463	0.923554	59.0833	18.7055	4.44301	3.8981	0.001	0.651504	3.41	4.58	0.57	100
118	564.168	9527.88	0.625569	0.0524997	0.000282937	0.321648	0.0774253	0.922575	0.6258	0.0525	0	0.3217	0.0773994	0.922601	58.3732	18.2321	3.99378	3.86268	0.001	0.426892	3.41	4.58	0.57	100

## Sheet: B5-4_p
No.	T(C)	P(bars)	Xalm	Xprp	Xsps	Xgrs	Mg#	Fe#	obs_Xalm	obs_Xprp	obs_Xsps	obs_Xgrs	obs_Mg#	obs_Fe#	blk_Si	blk_Al	blk_Fe	blk_Mg	blk_Mn	blk_Ca	blk_Na	blk_K	blk_Ti	blk_H
1	501.842	5927.25	0.468406	0.0247126	0.193383	0.313498	0.0501148	0.949885	0.4679	0.0247	0.1939	0.3134	0.0501421	0.949858	60.815	19.85	5.481	3.969	0.086	1.184	3.41	4.58	0.57	100
2	501.821	5928.39	0.468317	0.0246962	0.193245	0.313742	0.0500923	0.949908	0.4685	0.0247	0.1933	0.3135	0.0500811	0.949919	60.8148	19.8498	5.48089	3.96899	0.0859559	1.18393	3.41	4.58	0.57	100
3	502.039	5935.73	0.46923	0.0247864	0.192532	0.313452	0.0501732	0.949827	0.4692	0.0248	0.1926	0.3135	0.0502024	0.949798	60.8145	19.8497	5.48077	3.96899	0.0859069	1.18385	3.41	4.58	0.57	100
4	502.122	5942.33	0.469576	0.024805	0.191834	0.313785	0.0501738	0.949826	0.4699	0.0248	0.1918	0.3135	0.0501314	0.949869	60.8123	19.8482	5.47971	3.96893	0.0854705	1.18314	3.41	4.58	0.57	100
5	502.376	5951.81	0.470641	0.0249067	0.190897	0.313555	0.050261	0.949739	0.4706	0.0249	0.1909	0.3135	0.0502523	0.949748	60.8104	19.8469	5.47884	3.96889	0.0851166	1.18256	3.41	4.58	0.57	100
6	502.613	5961.91	0.471633	0.0249964	0.189881	0.313489	0.050332	0.949668	0.4715	0.025	0.19	0.3136	0.0503525	0.949648	60.8075	19.845	5.47748	3.96881	0.0845639	1.18165	3.41	4.58	0.57	100
7	502.849	5972.02	0.472626	0.0250864	0.188863	0.313424	0.0504033	0.949597	0.4724	0.0251	0.189	0.3136	0.0504523	0.949548	60.8045	19.843	5.47605	3.96874	0.0839875	1.1807	3.41	4.58	0.57	100
8	503.096	5981.97	0.473664	0.025183	0.187867	0.313287	0.0504825	0.949517	0.4734	0.0252	0.1879	0.3136	0.0505415	0.949458	60.8014	19.841	5.47461	3.96866	0.0834115	1.17974	3.41	4.58	0.57	100
9	503.232	5993.17	0.474237	0.025213	0.186681	0.313869	0.0504815	0.949519	0.4744	0.0252	0.1866	0.3137	0.0504404	0.94956	60.7984	19.8389	5.47317	3.96859	0.0828412	1.17879	3.41	4.58	0.57	100
10	503.517	6005.61	0.475438	0.0253214	0.185423	0.313818	0.050566	0.949434	0.4756	0.0253	0.1853	0.3137	0.0505091	0.949491	60.7952	19.8368	5.47166	3.96851	0.0822479	1.1778	3.41	4.58	0.57	100
11	503.899	6020.15	0.477047	0.0254758	0.18397	0.313507	0.0506958	0.949304	0.4769	0.0255	0.1839	0.3138	0.0507564	0.949244	60.7914	19.8343	5.46986	3.96841	0.0815456	1.17661	3.41	4.58	0.57	100
12	504.001	6029.1	0.477481	0.0255024	0.183193	0.313823	0.0507023	0.949298	0.4775	0.0255	0.1832	0.3138	0.0506958	0.949304	60.7869	19.8313	5.4677	3.96829	0.0807106	1.17518	3.41	4.58	0.57	100
13	504.275	6044.84	0.478648	0.0256087	0.182028	0.313715	0.050785	0.949215	0.4788	0.0256	0.182	0.3136	0.0507534	0.949247	60.7847	19.8298	5.46667	3.96824	0.0803171	1.17451	3.41	4.58	0.57	100
14	504.732	6060.7	0.48058	0.0257968	0.180301	0.313322	0.0509438	0.949056	0.4805	0.0258	0.1803	0.3133	0.0509579	0.949042	60.7812	19.8274	5.46496	3.96815	0.0796652	1.17339	3.41	4.58	0.57	100
15	505.193	6075.45	0.482533	0.0259891	0.178578	0.3129	0.0511072	0.948893	0.4824	0.026	0.1786	0.3131	0.0511408	0.948859	60.7757	19.8238	5.46233	3.96801	0.0786808	1.17168	3.41	4.58	0.57	100
16	505.669	6096.26	0.484561	0.0261835	0.176676	0.31258	0.0512654	0.948735	0.4843	0.0262	0.1767	0.3128	0.0513222	0.948678	60.7702	19.8201	5.45969	3.96786	0.0777015	1.16996	3.41	4.58	0.57	100
17	506.166	6118.86	0.486683	0.0263868	0.174666	0.312264	0.0514293	0.948571	0.4864	0.0264	0.1747	0.3125	0.0514821	0.948518	60.7642	19.8161	5.45678	3.96771	0.0766403	1.16808	3.41	4.58	0.57	100
18	506.668	6143.8	0.488839	0.0265919	0.172581	0.311988	0.0515916	0.948408	0.4887	0.0266	0.1726	0.3121	0.0516204	0.94838	60.7578	19.8119	5.45368	3.96754	0.0755282	1.16609	3.41	4.58	0.57	100
19	507.202	6177.79	0.491145	0.0268036	0.170202	0.31185	0.0517496	0.94825	0.4911	0.0268	0.1702	0.3118	0.0517474	0.948253	60.7512	19.8075	5.45044	3.96736	0.0743865	1.16403	3.41	4.58	0.57	100
20	507.85	6196.49	0.493921	0.0270864	0.167775	0.311217	0.0519885	0.948011	0.4937	0.0271	0.1678	0.3114	0.0520353	0.947965	60.7437	19.8025	5.44675	3.96716	0.0731071	1.16169	3.41	4.58	0.57	100
21	508.417	6237.68	0.496398	0.0273105	0.165118	0.311173	0.0521484	0.947852	0.4965	0.0273	0.1651	0.311	0.0521191	0.947881	60.7357	19.7972	5.44282	3.96695	0.0717701	1.15921	3.41	4.58	0.57	100
22	509.108	6267.33	0.499389	0.0276072	0.162303	0.3107	0.0523859	0.947614	0.4995	0.0276	0.1623	0.3106	0.052362	0.947638	60.7273	19.7915	5.43861	3.96671	0.0703708	1.15657	3.41	4.58	0.57	100
23	509.817	6302	0.502477	0.0279104	0.159311	0.310301	0.0526227	0.947377	0.5026	0.0279	0.1593	0.3102	0.0525919	0.947408	60.718	19.7853	5.43398	3.96646	0.0688662	1.15369	3.41	4.58	0.57	100
24	510.652	6328.05	0.506096	0.0282868	0.156085	0.309532	0.0529337	0.947066	0.506	0.0283	0.1561	0.3097	0.0529665	0.947033	60.7081	19.7787	5.42901	3.96618	0.0672886	1.15062	3.41	4.58	0.57	100
25	511.401	6373.5	0.5094	0.0286058	0.152704	0.309291	0.0531701	0.94683	0.5095	0.0286	0.1527	0.3092	0.05315	0.94685	60.6971	19.7714	5.42346	3.96587	0.0655791	1.14723	3.41	4.58	0.57	100
26	512.275	6409.99	0.513234	0.0289997	0.149092	0.308675	0.053482	0.946518	0.5132	0.029	0.1491	0.3087	0.0534858	0.946514	60.6858	19.7639	5.41768	3.96555	0.0638447	1.14371	3.41	4.58	0.57	100
27	513.166	6450.22	0.517163	0.0294036	0.145325	0.308109	0.0537969	0.946203	0.5172	0.0294	0.1453	0.3081	0.053787	0.946213	60.6733	19.7555	5.41128	3.96519	0.0619869	1.13987	3.41	4.58	0.57	100
28	514.065	6499.21	0.521164	0.0298081	0.141322	0.307706	0.054101	0.945899	0.5213	0.0298	0.1413	0.3076	0.0540737	0.945926	60.6602	19.7468	5.40448	3.9648	0.0600752	1.13581	3.41	4.58	0.57	100
29	515.089	6538.87	0.525692	0.0302919	0.137089	0.306927	0.0544834	0.945517	0.5256	0.0303	0.1371	0.307	0.0545062	0.945494	60.646	19.7374	5.39711	3.96438	0.0580783	1.13147	3.41	4.58	0.57	100
30	516.115	6580.02	0.530251	0.0307832	0.132791	0.306175	0.0548686	0.945131	0.5301	0.0308	0.1328	0.3064	0.0549117	0.945088	60.6307	19.7271	5.38903	3.96391	0.0559715	1.12675	3.41	4.58	0.57	100
31	517.166	6630.35	0.534955	0.0312854	0.128189	0.30557	0.0552511	0.944749	0.5348	0.0313	0.1282	0.3057	0.0552906	0.944709	60.6148	19.7165	5.38061	3.96342	0.0538613	1.12188	3.41	4.58	0.57	100
32	518.223	6683.08	0.539713	0.0317977	0.123487	0.305002	0.0556379	0.944362	0.5396	0.0318	0.1235	0.3051	0.0556528	0.944347	60.5975	19.705	5.37134	3.96288	0.0516415	1.11659	3.41	4.58	0.57	100
33	519.287	6741.55	0.544527	0.0323156	0.118618	0.304539	0.0560216	0.943978	0.5447	0.0323	0.1186	0.3044	0.0559792	0.944021	60.5793	19.6929	5.36157	3.96231	0.0494044	1.11107	3.41	4.58	0.57	100
34	520.454	6794.12	0.549789	0.0329066	0.113502	0.303803	0.0564731	0.943527	0.5498	0.0329	0.1135	0.3037	0.0564613	0.943539	60.5601	19.6801	5.3511	3.96168	0.0471237	1.10521	3.41	4.58	0.57	100
35	521.616	6845.9	0.555035	0.0335065	0.108398	0.30306	0.0569314	0.943069	0.5551	0.0335	0.1084	0.303	0.0569147	0.943085	60.5392	19.6661	5.3396	3.961	0.0447495	1.09886	3.41	4.58	0.57	100
36	522.795	6906.87	0.560396	0.0341186	0.103014	0.302471	0.057389	0.942611	0.5605	0.0341	0.103	0.3023	0.0573495	0.942651	60.5177	19.6518	5.32764	3.96027	0.0424146	1.09233	3.41	4.58	0.57	100
37	524.035	6959.04	0.565995	0.0347874	0.0975973	0.301621	0.0579035	0.942096	0.5659	0.0348	0.0976	0.3017	0.0579324	0.942068	60.4941	19.6361	5.31447	3.95947	0.0399929	1.08522	3.41	4.58	0.57	100
38	525.175	7029.52	0.571226	0.0353928	0.0921064	0.301274	0.0583443	0.941656	0.5711	0.0354	0.0921	0.3014	0.0583677	0.941632	60.4695	19.6196	5.3005	3.95861	0.0375843	1.07777	3.41	4.58	0.57	100
39	526.301	7107.24	0.576422	0.0359954	0.0864964	0.301087	0.0587759	0.941224	0.5764	0.036	0.0865	0.3011	0.0587851	0.941215	60.4435	19.6023	5.28566	3.95769	0.0351922	1.06995	3.41	4.58	0.57	100
40	527.421	7184.92	0.581583	0.0366077	0.0809052	0.300904	0.0592175	0.940783	0.5817	0.0366	0.0809	0.3008	0.0591946	0.940805	60.4157	19.5838	5.26963	3.95669	0.0327863	1.06157	3.41	4.58	0.57	100
41	528.613	7252.07	0.587	0.0372897	0.075301	0.300409	0.0597314	0.940269	0.5869	0.0373	0.0753	0.3005	0.0597565	0.940244	60.3865	19.5643	5.25263	3.95562	0.0304217	1.05278	3.41	4.58	0.57	100
42	528.969	7277.23	0.588641	0.0374912	0.07351	0.300358	0.0598775	0.940122	0.5886	0.0375	0.0735	0.3004	0.0598946	0.940105	60.3554	19.5436	5.23437	3.95446	0.0280793	1.04344	3.41	4.58	0.57	100
43	528.777	7278.3	0.589588	0.0372139	0.0724491	0.300749	0.0593711	0.940629	0.5895	0.0374	0.0727	0.3005	0.0596586	0.940341	60.3453	19.5369	5.22845	3.95409	0.02734	1.04041	3.41	4.58	0.57	100
44	528.997	7285.79	0.590323	0.0373182	0.0717038	0.300655	0.0594578	0.940542	0.5905	0.0373	0.0717	0.3005	0.0594138	0.940586	60.2983	19.5055	5.20073	3.95234	0.0239339	1.02628	3.41	4.58	0.57	100
45	531.191	7421.47	0.594621	0.0378954	0.0653023	0.302181	0.0599121	0.940088	0.5946	0.0379	0.0653	0.3022	0.0599209	0.940079	60.2788	19.4925	5.18919	3.9516	0.0225859	1.0204	3.41	4.58	0.57	100
46	533.472	7566.93	0.598919	0.0384919	0.0586966	0.303892	0.0603879	0.939612	0.5989	0.0385	0.0587	0.304	0.0604016	0.939598	60.2442	19.4695	5.16859	3.95029	0.0203878	1.00994	3.41	4.58	0.57	100
47	536.558	7948.11	0.597176	0.0380441	0.0516034	0.313176	0.0598912	0.940109	0.603	0.0391	0.0524	0.3056	0.0608939	0.939106	60.2	19.44	5.14213	3.94859	0.0178795	0.996375	3.41	4.58	0.57	100
48	537.702	7837.17	0.606885	0.0396909	0.0464946	0.30693	0.0613863	0.938614	0.6068	0.0397	0.0465	0.307	0.0614076	0.938592	60.1847	19.4298	5.13302	3.94801	0.017092	0.991596	3.41	4.58	0.57	100
49	539.632	7968.09	0.610126	0.0402274	0.0411012	0.308545	0.0618546	0.938145	0.6103	0.0402	0.0411	0.3083	0.0617986	0.938201	60.1436	19.4024	5.10804	3.94638	0.0151788	0.978966	3.41	4.58	0.57	100
50	541.46	8085.13	0.61341	0.0408179	0.0360024	0.30977	0.062391	0.937609	0.6136	0.0408	0.036	0.3096	0.0623472	0.937653	60.0999	19.3733	5.08139	3.94462	0.0133834	0.965488	3.41	4.58	0.57	100
51	543.141	8190.37	0.61641	0.0414058	0.0314062	0.310778	0.0629443	0.937056	0.6166	0.0414	0.0314	0.3107	0.0629179	0.937082	60.0527	19.3418	5.05246	3.9427	0.0116854	0.950878	3.41	4.58	0.57	100
52	544.766	8291.49	0.619189	0.0420075	0.027101	0.311703	0.0635325	0.936467	0.6192	0.042	0.0271	0.3117	0.0635209	0.936479	60.0041	19.3094	5.02251	3.94068	0.0101593	0.935777	3.41	4.58	0.57	100
53	546.279	8394.46	0.621297	0.0425322	0.0233055	0.312865	0.064071	0.935929	0.6216	0.0425	0.0233	0.3126	0.0639964	0.936004	59.9516	19.2744	4.98998	3.93848	0.00873558	0.919402	3.41	4.58	0.57	100
54	547.728	8484.78	0.623423	0.0431229	0.0198021	0.313652	0.0646961	0.935304	0.6236	0.0431	0.0198	0.3135	0.0646468	0.935353	59.8981	19.2388	4.95677	3.9362	0.00748962	0.902675	3.41	4.58	0.57	100
55	549.059	8574.34	0.624957	0.0436454	0.0168025	0.314595	0.0652786	0.934721	0.6254	0.0436	0.0168	0.3143	0.0651719	0.934828	59.8401	19.2001	4.92059	3.9337	0.00634063	0.884476	3.41	4.58	0.57	100
56	550.332	8651.8	0.626488	0.0442319	0.014099	0.315182	0.0659469	0.934053	0.6268	0.0442	0.0141	0.315	0.0658718	0.934128	59.7819	19.1613	4.88423	3.93116	0.00536306	0.866173	3.41	4.58	0.57	100
57	551.584	8738.76	0.627409	0.04476	0.0117024	0.316129	0.0665904	0.93341	0.6279	0.0447	0.0117	0.3157	0.0664585	0.933541	59.7195	19.1197	4.84514	3.9284	0.00448325	0.846505	3.41	4.58	0.57	100
58	552.727	8764.68	0.629693	0.0456537	0.00958213	0.315071	0.0676003	0.9324	0.6288	0.0453	0.0096	0.3163	0.0672007	0.932799	59.6534	19.0756	4.80362	3.92544	0.00370888	0.825586	3.41	4.58	0.57	100
59	553.89	8889.1	0.628743	0.0458851	0.00790062	0.317472	0.0680154	0.931985	0.6294	0.0458	0.0079	0.3169	0.0678318	0.932168	59.5813	19.0275	4.75823	3.92215	0.00301814	0.802874	3.41	4.58	0.57	100
60	554.996	8959.71	0.629083	0.0464756	0.00640125	0.318041	0.0687959	0.931204	0.6298	0.0464	0.0064	0.3175	0.0686188	0.931381	59.5139	18.9826	4.71586	3.91906	0.00248572	0.781479	3.41	4.58	0.57	100
61	556.132	9041.86	0.628909	0.0470417	0.00510115	0.318948	0.0695934	0.930407	0.6299	0.0469	0.0051	0.318	0.0692967	0.930703	59.439	18.9326	4.66873	3.91558	0.00200616	0.757653	3.41	4.58	0.57	100
62	556.921	9084.8	0.629393	0.0475247	0.00400063	0.319082	0.0702075	0.929792	0.6299	0.0475	0.004	0.3185	0.0701211	0.929879	59.3579	18.8786	4.61777	3.91176	0.00159284	0.731811	3.41	4.58	0.57	100
63	557.509	9052.67	0.630961	0.0483981	0.00371231	0.316929	0.0712408	0.928759	0.6299	0.0477	0.0037	0.3187	0.0703955	0.929604	59.2614	18.8143	4.557	3.90717	0.00120653	0.700999	3.41	4.58	0.57	100
64	558.047	9028.6	0.632493	0.0491569	0.00320721	0.315143	0.0721146	0.927885	0.6303	0.0477	0.0032	0.3187	0.070354	0.929646	59.2458	18.8038	4.54715	3.90642	0.00114859	0.696053	3.41	4.58	0.57	100
65	558.795	8988.51	0.634652	0.0503036	0.00262867	0.312416	0.0734406	0.926559	0.6308	0.0478	0.0026	0.3188	0.0704391	0.929561	59.1949	18.77	4.515	3.90392	0.001	0.680035	3.41	4.58	0.57	100
66	555.538	9233.69	0.626328	0.0448859	0.00208128	0.326705	0.0668727	0.933127	0.6313	0.0478	0.0021	0.3189	0.0703873	0.929613	59.0294	18.6596	4.4103	3.89586	0.001	0.627617	3.41	4.58	0.57	100
67	557.448	9373.33	0.624222	0.0460471	0.00159593	0.328135	0.0686993	0.931301	0.6317	0.0478	0.0016	0.3189	0.0703458	0.929654	58.8295	18.5264	4.28542	3.88683	0.001	0.562283	3.41	4.58	0.57	100
68	560.223	9247.21	0.629921	0.0499185	0.00120058	0.31896	0.073427	0.926573	0.632	0.0478	0.0012	0.319	0.0703148	0.929685	58.5892	18.3662	4.13537	3.87553	0.001	0.483966	3.41	4.58	0.57	100
69	564.28	9520.59	0.6233	0.0529	0.0026	0.3211	0.0782	0.9218	0.6323	0.0479	0.0008	0.319	0.0704	0.9296	58.2654	18.1503	3.9321	3.8591	0.001	0.3805	3.41	4.58	0.57	100
70	567.27	9541.98	0.6261	0.0562	0.001	0.3167	0.0824	0.9176	0.6324	0.0479	0.0007	0.319	0.0704	0.9296	57.9488	17.9392	3.7346	3.8422	0.0003	0.2791	3.41	4.58	0.57	100
71	570.85	9569.38	0.6301	0.0604	0.0004	0.3091	0.0875	0.9125	0.6316	0.0485	0.0005	0.3195	0.0713	0.9287	57.6895	17.7663	3.5721	3.8273	0.0001	0.1974	3.41	4.58	0.57	100
72	571.19	9596.78	0.6303	0.0606	0.0004	0.3087	0.0877	0.9123	0.6305	0.0493	0.0002	0.32	0.0725	0.9275	57.6029	17.7085	3.5175	3.8221	0.0001	0.1706	3.41	4.58	0.57	100
73	571.71	9624.18	0.6312	0.0609	0.0006	0.3073	0.0881	0.9119	0.6293	0.0501	0.0001	0.3205	0.0737	0.9263	57.5964	17.7041	3.5134	3.8217	0.0001	0.1686	3.41	4.58	0.57	100
74	572.36	9651.58	0.6326	0.0614	0.0006	0.3054	0.0885	0.9115	0.628	0.051	0	0.3209	0.0751	0.9249	57.5905	17.7002	3.5097	3.8213	0.0001	0.1668	3.41	4.58	0.57	100
75	572.86	9678.98	0.6334	0.0618	0.0006	0.3042	0.0889	0.9111	0.6269	0.0517	0	0.3213	0.0762	0.9238	57.5846	17.6963	3.506	3.8209	0.0001	0.165	3.41	4.58	0.57	100
76	572.86	9706.38	0.6323	0.0616	0.0006	0.3055	0.0887	0.9113	0.6258	0.0525	0	0.3217	0.0774	0.9226	57.5781	17.692	3.5019	3.8205	0.0001	0.163	3.41	4.58	0.57	100

## Sheet: B5-4_d
No.	T(C)	P(bars)	Xalm	Xprp	Xsps	Xgrs	Mg#	Fe#	obs_Xalm	obs_Xprp	obs_Xsps	obs_Xgrs	obs_Mg#	obs_Fe#	blk_Si	blk_Al	blk_Fe	blk_Mg	blk_Mn	blk_Ca	blk_Na	blk_K	blk_Ti	blk_H
1	504.12	6168.99	0.478145	0.0254195	0.179911	0.316524	0.0504792	0.949521	0.4818	0.0252	0.1795	0.3135	0.0497041	0.950296	60.8131	19.8487	5.48012	3.96895	0.0856377	1.18339	3.41	4.58	0.57	100
2	504.13	6169.66	0.47819	0.0254235	0.179865	0.316521	0.0504822	0.949518	0.4818	0.0252	0.1795	0.3135	0.0497041	0.950296	60.7749	19.8233	5.46185	3.96798	0.0787626	1.1713	3.41	4.58	0.57	100
3	504.164	6180.61	0.478351	0.0254282	0.179528	0.316692	0.0504749	0.949525	0.4821	0.0252	0.1791	0.3136	0.0496747	0.950325	60.7747	19.8232	5.46178	3.96798	0.078737	1.17125	3.41	4.58	0.57	100
4	504.22	6195.01	0.478611	0.0254394	0.17905	0.316899	0.05047	0.94953	0.4825	0.0252	0.1786	0.3136	0.0496356	0.950364	60.7738	19.8225	5.46133	3.96796	0.0785676	1.17095	3.41	4.58	0.57	100
5	504.408	6197.62	0.479399	0.0255198	0.178425	0.316656	0.0505425	0.949458	0.4831	0.0253	0.178	0.3136	0.049764	0.950236	60.7724	19.8216	5.46068	3.96792	0.0783238	1.17052	3.41	4.58	0.57	100
6	504.632	6204.67	0.48035	0.0256127	0.177591	0.316446	0.0506217	0.949378	0.4839	0.0254	0.1772	0.3136	0.0498724	0.950128	60.7704	19.8203	5.4597	3.96787	0.0779587	1.16987	3.41	4.58	0.57	100
7	504.748	6232.5	0.480888	0.0256381	0.176641	0.316833	0.0506156	0.949384	0.4847	0.0254	0.1762	0.3136	0.0497942	0.950206	60.7677	19.8185	5.45841	3.9678	0.0774835	1.16903	3.41	4.58	0.57	100
8	505	6248.68	0.481975	0.0257353	0.175525	0.316765	0.050689	0.949311	0.4858	0.0255	0.1751	0.3136	0.0498729	0.950127	60.765	19.8167	5.45709	3.96773	0.0769989	1.16816	3.41	4.58	0.57	100
9	505.264	6267.5	0.483117	0.0258355	0.174314	0.316733	0.050762	0.949238	0.4869	0.0256	0.1739	0.3135	0.0499512	0.950049	60.7615	19.8143	5.45541	3.96764	0.0763841	1.16705	3.41	4.58	0.57	100
10	505.55	6291.46	0.484368	0.0259415	0.17292	0.316771	0.0508348	0.949165	0.4883	0.0257	0.1725	0.3135	0.05	0.95	60.7577	19.8118	5.45358	3.96754	0.0757236	1.16585	3.41	4.58	0.57	100
11	505.985	6305.98	0.486226	0.0261238	0.171269	0.316381	0.0509882	0.949012	0.4898	0.0259	0.1709	0.3134	0.050223	0.949777	60.7533	19.8089	5.45147	3.96743	0.0749721	1.16447	3.41	4.58	0.57	100
12	506.236	6320.59	0.487314	0.0262237	0.17018	0.316283	0.0510649	0.948935	0.4909	0.026	0.1698	0.3133	0.0502999	0.9497	60.748	19.8053	5.44885	3.96729	0.0740498	1.16277	3.41	4.58	0.57	100
13	506.491	6336.11	0.488422	0.026325	0.169056	0.316197	0.0511417	0.948858	0.4921	0.0261	0.1687	0.3132	0.0503667	0.949633	60.7445	19.803	5.44715	3.9672	0.0734569	1.16166	3.41	4.58	0.57	100
14	506.842	6371.5	0.489985	0.0264524	0.1672	0.316363	0.0512209	0.948779	0.494	0.0262	0.1668	0.313	0.0503652	0.949635	60.7409	19.8006	5.4454	3.9671	0.0728484	1.16053	3.41	4.58	0.57	100
15	507.337	6397.1	0.492134	0.0266553	0.165106	0.316104	0.0513798	0.94862	0.4961	0.0264	0.1647	0.3127	0.0505263	0.949474	60.735	19.7967	5.44253	3.96695	0.0718718	1.15868	3.41	4.58	0.57	100
16	507.85	6426.23	0.494375	0.0268649	0.162872	0.315889	0.0515403	0.94846	0.4984	0.0266	0.1625	0.3125	0.0506667	0.949333	60.7282	19.7921	5.43916	3.96677	0.0707413	1.15651	3.41	4.58	0.57	100
17	508.369	6460.44	0.496662	0.0270743	0.160498	0.315766	0.0516946	0.948305	0.5009	0.0268	0.1601	0.3122	0.0507864	0.949214	60.7209	19.7872	5.43554	3.96657	0.0695469	1.1542	3.41	4.58	0.57	100
18	509.027	6481.87	0.499513	0.0273627	0.157957	0.315167	0.0519338	0.948066	0.5035	0.0271	0.1576	0.3118	0.0510743	0.948926	60.713	19.782	5.43166	3.96636	0.0682943	1.15173	3.41	4.58	0.57	100
19	509.597	6526.12	0.50206	0.027591	0.155183	0.315166	0.0520928	0.947907	0.5063	0.0273	0.1548	0.3115	0.0511619	0.948838	60.7044	19.7763	5.42735	3.96612	0.0669302	1.14901	3.41	4.58	0.57	100
20	510.282	6555.63	0.505062	0.0278896	0.152359	0.31469	0.0523305	0.94767	0.5093	0.0276	0.152	0.3111	0.0514062	0.948594	60.6952	19.7701	5.42271	3.96587	0.0654972	1.1461	3.41	4.58	0.57	100
21	510.985	6594.13	0.508177	0.0281918	0.149265	0.314366	0.0525605	0.947439	0.5125	0.0279	0.1489	0.3107	0.0516284	0.948372	60.6855	19.7636	5.41781	3.9656	0.0640188	1.14305	3.41	4.58	0.57	100
22	511.704	6634.34	0.511378	0.0285037	0.146068	0.314051	0.0527962	0.947204	0.5158	0.0282	0.1457	0.3103	0.0518382	0.948162	60.6748	19.7565	5.41239	3.96529	0.0624261	1.13969	3.41	4.58	0.57	100
23	512.434	6677.36	0.514646	0.0288219	0.142758	0.313775	0.0530333	0.946967	0.5193	0.0285	0.1424	0.3099	0.0520263	0.947974	60.6636	19.7491	5.40668	3.96498	0.0607957	1.13619	3.41	4.58	0.57	100
24	513.179	6724.99	0.518006	0.0291471	0.139281	0.313566	0.0532705	0.94673	0.5229	0.0288	0.1389	0.3094	0.0522023	0.947798	60.6519	19.7413	5.40066	3.96464	0.0591263	1.13252	3.41	4.58	0.57	100
25	514.049	6764.87	0.521889	0.029546	0.135554	0.313011	0.0535802	0.94642	0.5267	0.0292	0.1352	0.3089	0.0525274	0.947473	60.6395	19.733	5.39422	3.96428	0.0573935	1.12862	3.41	4.58	0.57	100
26	514.919	6807.6	0.525796	0.0299479	0.131744	0.312512	0.0538879	0.946112	0.5306	0.0296	0.1314	0.3084	0.0528383	0.947162	60.6258	19.7239	5.38708	3.96387	0.0555381	1.12433	3.41	4.58	0.57	100
27	515.806	6852	0.52979	0.0303619	0.127826	0.312023	0.054203	0.945797	0.5346	0.03	0.1275	0.3078	0.053135	0.946865	60.6116	19.7144	5.3796	3.96345	0.053665	1.11989	3.41	4.58	0.57	100
28	516.789	6886.75	0.534179	0.0308413	0.123784	0.311196	0.0545844	0.945416	0.5388	0.0305	0.1235	0.3073	0.0535746	0.946425	60.5967	19.7045	5.37171	3.96299	0.0517615	1.11524	3.41	4.58	0.57	100
29	517.688	6936.71	0.538272	0.0312694	0.119662	0.310797	0.0549028	0.945097	0.543	0.0309	0.1194	0.3067	0.0538421	0.946158	60.5809	19.6939	5.36328	3.96251	0.0498069	1.11033	3.41	4.58	0.57	100
30	518.675	6976.43	0.542716	0.0317603	0.115459	0.310065	0.0552857	0.944714	0.5473	0.0314	0.1152	0.3061	0.0542595	0.94574	60.5646	19.6831	5.3545	3.962	0.0478549	1.10526	3.41	4.58	0.57	100
31	519.66	7016.75	0.547158	0.0322568	0.111235	0.30935	0.0556714	0.944329	0.5517	0.0319	0.111	0.3055	0.0546607	0.945339	60.5475	19.6716	5.34519	3.96145	0.0458762	1.09995	3.41	4.58	0.57	100
32	520.65	7064.65	0.551666	0.0327579	0.106802	0.308774	0.0560516	0.943948	0.5561	0.0324	0.1066	0.3049	0.0550552	0.944945	60.5298	19.6599	5.33553	3.96088	0.0439121	1.09448	3.41	4.58	0.57	100
33	521.635	7106.55	0.55613	0.0332695	0.102509	0.308092	0.0564464	0.943554	0.5605	0.0329	0.1023	0.3042	0.0554432	0.944557	60.5108	19.6472	5.32505	3.96026	0.041882	1.08861	3.41	4.58	0.57	100
34	522.697	7142.11	0.560908	0.0338395	0.0980821	0.307171	0.0568973	0.943103	0.5649	0.0335	0.0979	0.3036	0.0559826	0.944017	60.4918	19.6345	5.31449	3.95963	0.039936	1.08277	3.41	4.58	0.57	100
35	523.751	7174.75	0.565631	0.0344166	0.0937418	0.306211	0.0573565	0.942643	0.5693	0.0341	0.0936	0.3031	0.0565131	0.943487	60.4716	19.621	5.30313	3.95894	0.0379488	1.07654	3.41	4.58	0.57	100
36	524.568	7212.47	0.569349	0.0348602	0.0900851	0.305705	0.0576956	0.942304	0.5736	0.0346	0.0892	0.3026	0.0568892	0.943111	60.451	19.6074	5.29151	3.95824	0.0360239	1.07025	3.41	4.58	0.57	100
37	525.861	7231.29	0.575042	0.0356122	0.0852208	0.304125	0.0583181	0.941682	0.5777	0.0352	0.0849	0.3022	0.0574319	0.942568	60.4333	19.5955	5.28142	3.95762	0.0344279	1.06484	3.41	4.58	0.57	100
38	526.485	7243.49	0.579924	0.0358026	0.0807635	0.30351	0.058147	0.941853	0.5818	0.0357	0.0807	0.3018	0.0578138	0.942186	60.4085	19.579	5.26714	3.95673	0.0323114	1.05729	3.41	4.58	0.57	100
39	526.526	7243.13	0.580152	0.035835	0.0805936	0.30342	0.0581749	0.941825	0.5856	0.0362	0.0765	0.3017	0.0582181	0.941782	60.3426	19.5351	5.22895	3.95438	0.026993	1.0373	3.41	4.58	0.57	100
40	529.04	7344.73	0.58777	0.0368833	0.072368	0.302979	0.0590461	0.940954	0.5893	0.0367	0.0723	0.3016	0.0586262	0.941374	60.3418	19.5345	5.22849	3.95435	0.0269285	1.03706	3.41	4.58	0.57	100
41	530.307	7404.18	0.591202	0.0373607	0.0683505	0.303086	0.0594383	0.940562	0.5926	0.0372	0.0683	0.3019	0.0590664	0.940934	60.3014	19.5076	5.20472	3.95286	0.0240022	1.0248	3.41	4.58	0.57	100
42	532.281	7730.72	0.586262	0.0364464	0.0648856	0.312406	0.0585288	0.941471	0.5943	0.0374	0.0662	0.3021	0.0592053	0.940795	60.273	19.4887	5.18798	3.9518	0.0220773	1.01617	3.41	4.58	0.57	100
43	531.654	7471.49	0.594653	0.0378454	0.0641424	0.303359	0.0598347	0.940165	0.5959	0.0377	0.0641	0.3023	0.0595013	0.940499	60.264	19.4827	5.18268	3.95147	0.0214924	1.01337	3.41	4.58	0.57	100
44	532.738	7529.51	0.597229	0.0382138	0.0608317	0.303725	0.0601373	0.939863	0.5982	0.0381	0.0608	0.3029	0.0598774	0.940123	60.2586	19.4791	5.17946	3.95127	0.0211456	1.01173	3.41	4.58	0.57	100
45	533.834	7598.29	0.599366	0.0385169	0.0576297	0.304487	0.0603823	0.939618	0.6003	0.0384	0.0576	0.3036	0.0601221	0.939878	60.24	19.4666	5.16832	3.95055	0.0200111	1.00606	3.41	4.58	0.57	100
46	534.671	7590.8	0.603732	0.0392162	0.0543619	0.30269	0.0609943	0.939006	0.6025	0.0389	0.054	0.3047	0.0606486	0.939351	60.2212	19.4541	5.15708	3.94983	0.0189304	1.00035	3.41	4.58	0.57	100
47	537.164	7997.48	0.598125	0.0381438	0.0497497	0.313982	0.0599492	0.940051	0.6043	0.0393	0.0505	0.3058	0.0610628	0.938937	60.1849	19.4299	5.13519	3.94841	0.0169866	0.989265	3.41	4.58	0.57	100
48	537.351	7800.88	0.606991	0.0396768	0.0471791	0.306153	0.0613558	0.938644	0.606	0.0398	0.0472	0.307	0.061629	0.938371	60.1642	19.4161	5.12278	3.94762	0.015971	0.982818	3.41	4.58	0.57	100
49	539.549	8230.87	0.599996	0.0383597	0.0431299	0.318514	0.0600915	0.939909	0.6075	0.0403	0.044	0.3082	0.0622106	0.937789	60.1378	19.3985	5.10679	3.94658	0.0147506	0.974629	3.41	4.58	0.57	100
50	540.433	8248.51	0.603151	0.0388943	0.0403196	0.317635	0.0605787	0.939421	0.6089	0.0408	0.0409	0.3094	0.0627982	0.937202	60.1271	19.3914	5.10041	3.94617	0.0142916	0.971239	3.41	4.58	0.57	100
51	540.502	7975.27	0.613905	0.0408468	0.0379554	0.307293	0.0623852	0.937615	0.6103	0.0413	0.038	0.3105	0.0633824	0.936618	60.0913	19.3676	5.07878	3.94477	0.012861	0.959937	3.41	4.58	0.57	100
52	541.261	7971.1	0.617401	0.0414946	0.0353091	0.305795	0.062976	0.937024	0.6115	0.0418	0.0352	0.3115	0.0639829	0.936017	60.0766	19.3577	5.06974	3.94417	0.0123025	0.955415	3.41	4.58	0.57	100
53	542.398	8075.08	0.61807	0.0416319	0.0325473	0.307751	0.0631072	0.936893	0.6127	0.0423	0.0326	0.3124	0.0645802	0.93542	60.0507	19.3405	5.05375	3.94309	0.0113879	0.947494	3.41	4.58	0.57	100
54	543.272	8112.7	0.620248	0.0420693	0.0300432	0.307639	0.0635183	0.936482	0.6138	0.0429	0.0301	0.3133	0.0653266	0.934673	60.0234	19.3223	5.03687	3.94196	0.0104989	0.939088	3.41	4.58	0.57	100
55	544.15	8157.62	0.622099	0.0424632	0.0276458	0.307792	0.0638964	0.936104	0.6148	0.0434	0.0277	0.3141	0.0659374	0.934063	59.9956	19.3037	5.01962	3.94079	0.00966341	0.930533	3.41	4.58	0.57	100
56	545.014	8201.67	0.623865	0.0428605	0.0253424	0.307932	0.0642851	0.935715	0.6158	0.0439	0.0254	0.3149	0.0665454	0.933455	59.9669	19.2846	5.00178	3.93957	0.00887052	0.921705	3.41	4.58	0.57	100
57	545.816	8241.08	0.625501	0.043249	0.0232467	0.308003	0.0646714	0.935329	0.6167	0.0444	0.0233	0.3156	0.0671608	0.932839	59.937	19.2646	4.98308	3.93829	0.00811124	0.912479	3.41	4.58	0.57	100
58	546.6	8278.78	0.627069	0.0436443	0.0212491	0.308037	0.0650715	0.934929	0.6175	0.0449	0.0213	0.3162	0.0677838	0.932216	59.9073	19.2449	4.96454	3.937	0.0074222	0.90335	3.41	4.58	0.57	100
59	547.281	8292.42	0.629081	0.0441448	0.0194219	0.307352	0.065572	0.934428	0.6184	0.0454	0.0194	0.3168	0.0683941	0.931606	59.8765	19.2243	4.94522	3.93566	0.00676734	0.893857	3.41	4.58	0.57	100
60	548.122	8350.24	0.629963	0.0444509	0.0175558	0.30803	0.0659105	0.93409	0.6192	0.0459	0.0176	0.3173	0.0690122	0.930988	59.8454	19.2036	4.92567	3.93429	0.00616383	0.884306	3.41	4.58	0.57	100
61	548.779	8363.82	0.631738	0.0449486	0.0159318	0.307382	0.0664246	0.933575	0.62	0.0463	0.016	0.3177	0.0694882	0.930512	59.8112	19.1808	4.90408	3.93276	0.00556225	0.873751	3.41	4.58	0.57	100
62	549.431	8376.96	0.633435	0.0454567	0.0143853	0.306723	0.0669572	0.933043	0.6209	0.0467	0.0144	0.3181	0.0699521	0.930048	59.7778	19.1585	4.883	3.93126	0.00503039	0.86349	3.41	4.58	0.57	100
63	549.963	8450.87	0.632541	0.0453666	0.0135678	0.308525	0.0669216	0.933078	0.6213	0.0469	0.0136	0.3182	0.0701886	0.929811	59.7427	19.1352	4.8608	3.92967	0.00452626	0.85274	3.41	4.58	0.57	100
64	550.339	8458.59	0.633454	0.0456626	0.012733	0.308151	0.0672383	0.932762	0.6218	0.047	0.0128	0.3184	0.0702751	0.929725	59.7242	19.1228	4.84905	3.92883	0.00427432	0.847011	3.41	4.58	0.57	100
65	551.134	8532.07	0.633325	0.0458442	0.0113761	0.309455	0.0675005	0.9325	0.6227	0.0473	0.0114	0.3186	0.070597	0.929403	59.7029	19.1086	4.83556	3.92786	0.00400322	0.840451	3.41	4.58	0.57	100
66	551.861	8547.16	0.63487	0.0464378	0.0099616	0.308731	0.0681598	0.93184	0.6236	0.0475	0.01	0.3188	0.0707793	0.929221	59.6651	19.0834	4.81167	3.92613	0.00357399	0.828775	3.41	4.58	0.57	100
67	552.523	8561.06	0.636166	0.0469894	0.00876726	0.308077	0.0687829	0.931217	0.6245	0.0478	0.0088	0.319	0.0710992	0.928901	59.6193	19.0528	4.78254	3.924	0.00311695	0.81461	3.41	4.58	0.57	100
68	553.595	8706.19	0.634128	0.0469172	0.00748658	0.311468	0.0688899	0.93111	0.6252	0.0481	0.0075	0.3192	0.0714392	0.928561	59.5755	19.0236	4.75468	3.92194	0.00273303	0.801119	3.41	4.58	0.57	100
69	554.349	8722.34	0.635318	0.0475652	0.00638856	0.310729	0.0696535	0.930346	0.6257	0.0485	0.0064	0.3195	0.0719371	0.928063	59.5226	18.9884	4.72114	3.91946	0.002337	0.784643	3.41	4.58	0.57	100
70	554.929	8734.78	0.63615	0.0480747	0.00561672	0.310158	0.0702615	0.929739	0.626	0.0487	0.0056	0.3196	0.0721802	0.92782	59.4676	18.9517	4.68619	3.91684	0.00198556	0.76755	3.41	4.58	0.57	100
71	555.73	8851.51	0.63417	0.0479989	0.00489333	0.312938	0.0703622	0.929638	0.6262	0.0491	0.0049	0.3198	0.0727084	0.927292	59.4238	18.9225	4.65835	3.91473	0.00173975	0.753976	3.41	4.58	0.57	100
72	556.812	8921.86	0.63395	0.0486126	0.00389405	0.313543	0.0712207	0.928779	0.6263	0.0497	0.0039	0.3202	0.0735207	0.926479	59.3783	18.8922	4.62951	3.91255	0.00151726	0.739747	3.41	4.58	0.57	100
73	558.358	9016.54	0.633445	0.0495784	0.00279897	0.314178	0.0725867	0.927413	0.6263	0.0503	0.0028	0.3205	0.0743423	0.925658	59.2976	18.8384	4.57831	3.90863	0.00120277	0.714425	3.41	4.58	0.57	100
74	556.178	9228.18	0.627142	0.0455842	0.00187546	0.325399	0.0677604	0.93224	0.6262	0.051	0.0019	0.3209	0.0753101	0.92469	58.8766	18.5578	4.3124	3.88839	0.001	0.580491	3.41	4.58	0.57	100
75	560.967	9184.2	0.632397	0.0512312	0.000899565	0.315472	0.0749401	0.92506	0.626	0.0518	0.0009	0.3213	0.0764237	0.923576	58.6139	18.3826	4.14732	3.87583	0.001	0.496	3.41	4.58	0.57	100
76	564.087	9520.97	0.62518	0.0524962	0.000780154	0.321543	0.077465	0.922535	0.6258	0.0525	0	0.3217	0.0773994	0.922601	58.2069	18.1113	3.89099	3.85485	0.001	0.367165	3.41	4.58	0.57	100

## Sheet: B5-6_p
No.	T(C)	P(bars)	Xalm	Xprp	Xsps	Xgrs	Mg#	Fe#	obs_Xalm	obs_Xprp	obs_Xsps	obs_Xgrs	obs_Mg#	obs_Fe#	blk_Si	blk_Al	blk_Fe	blk_Mg	blk_Mn	blk_Ca	blk_Na	blk_K	blk_Ti	blk_H
1	517.377	6665.58	0.53601	0.0313595	0.126684	0.305947	0.0552717	0.944728	0.5348	0.0313	0.1282	0.3057	0.0552906	0.944709	60.649	19.74	5.37	3.963	0.051	1.115	3.41	4.58	0.57	100
2	518.213	6682.81	0.539704	0.0317899	0.123493	0.305013	0.055626	0.944374	0.5396	0.0318	0.1235	0.3051	0.0556528	0.944347	60.649	19.74	5.37	3.963	0.0509999	1.115	3.41	4.58	0.57	100
3	519.288	6740.07	0.544566	0.0323155	0.118611	0.304508	0.0560177	0.943982	0.5447	0.0323	0.1186	0.3044	0.0559792	0.944021	60.6365	19.7317	5.36326	3.9626	0.0494582	1.11119	3.41	4.58	0.57	100
4	520.454	6792.88	0.54982	0.0329052	0.113495	0.303779	0.0564678	0.943532	0.5498	0.0329	0.1135	0.3037	0.0564613	0.943539	60.6172	19.7188	5.35274	3.96198	0.0471669	1.10531	3.41	4.58	0.57	100
5	521.615	6844.4	0.555063	0.033505	0.1084	0.303032	0.0569263	0.943074	0.5551	0.0335	0.1084	0.303	0.0569147	0.943085	60.5963	19.7048	5.34123	3.96129	0.0447908	1.09895	3.41	4.58	0.57	100
6	522.792	6905.69	0.560417	0.0341157	0.103015	0.302453	0.0573824	0.942618	0.5605	0.0341	0.103	0.3023	0.0573495	0.942651	60.5747	19.6905	5.32928	3.96057	0.0424568	1.09243	3.41	4.58	0.57	100
7	524.035	6958.14	0.566027	0.0347857	0.0975829	0.301604	0.0578977	0.942102	0.5659	0.0348	0.0976	0.3017	0.0579324	0.942068	60.5512	19.6748	5.31609	3.95977	0.0400325	1.08531	3.41	4.58	0.57	100
8	525.17	7029.1	0.571239	0.0353877	0.0920986	0.301274	0.0583352	0.941665	0.5711	0.0354	0.0921	0.3014	0.0583677	0.941632	60.5264	19.6583	5.30207	3.9589	0.0376148	1.07783	3.41	4.58	0.57	100
9	526.299	7106.02	0.576442	0.0359927	0.0864978	0.301067	0.0587698	0.94123	0.5764	0.036	0.0865	0.3011	0.0587851	0.941215	60.5005	19.641	5.28724	3.95798	0.0352235	1.07001	3.41	4.58	0.57	100
10	527.425	7182.9	0.581625	0.0366094	0.0809053	0.30086	0.0592161	0.940784	0.5817	0.0366	0.0809	0.3008	0.0591946	0.940805	60.4727	19.6224	5.27121	3.95698	0.0328185	1.06164	3.41	4.58	0.57	100
11	528.612	7251.39	0.587025	0.037287	0.0752896	0.300399	0.059725	0.940275	0.5869	0.0373	0.0753	0.3005	0.0597565	0.940244	60.4434	19.6029	5.25418	3.95591	0.0304503	1.05283	3.41	4.58	0.57	100
12	528.985	7274.85	0.588731	0.0375009	0.0734775	0.30029	0.0598835	0.940117	0.5886	0.0375	0.0735	0.3004	0.0598946	0.940105	60.4122	19.5821	5.23587	3.95475	0.0281013	1.04346	3.41	4.58	0.57	100
13	528.752	7278.15	0.589515	0.0371929	0.0725018	0.30079	0.0593464	0.940654	0.5895	0.0374	0.0727	0.3005	0.0596586	0.940341	60.402	19.5753	5.22986	3.95437	0.0273516	1.0404	3.41	4.58	0.57	100
14	528.977	7283.94	0.590362	0.0373144	0.0717067	0.300617	0.0594485	0.940552	0.5905	0.0373	0.0717	0.3005	0.0594138	0.940586	60.3551	19.5441	5.20225	3.95262	0.0239564	1.02631	3.41	4.58	0.57	100
15	531.175	7419.68	0.594672	0.0378934	0.0652942	0.30214	0.0599042	0.940096	0.5946	0.0379	0.0653	0.3022	0.0599209	0.940079	60.3353	19.5309	5.19052	3.95188	0.0225857	1.02034	3.41	4.58	0.57	100
16	533.454	7565.62	0.598943	0.0384852	0.0586999	0.303872	0.0603758	0.939624	0.5989	0.0385	0.0587	0.304	0.0604016	0.939598	60.3008	19.5078	5.16993	3.95057	0.0203881	1.00988	3.41	4.58	0.57	100
17	534.987	7551.98	0.606963	0.0397839	0.0526831	0.30057	0.0615139	0.938486	0.603	0.0391	0.0524	0.3056	0.0608939	0.939106	60.2818	19.4952	5.15859	3.94984	0.019277	1.00413	3.41	4.58	0.57	100
18	537.684	7835.39	0.606917	0.0396868	0.0465021	0.306894	0.0613774	0.938623	0.6068	0.0397	0.0465	0.307	0.0614076	0.938592	60.222	19.4553	5.12228	3.94746	0.016182	0.98609	3.41	4.58	0.57	100
19	540.418	8245.42	0.603069	0.0389125	0.0404735	0.317545	0.0606131	0.939387	0.6103	0.0402	0.0411	0.3083	0.0617986	0.938201	60.1741	19.4234	5.09323	3.94557	0.0140294	0.971226	3.41	4.58	0.57	100
20	541.413	8080.28	0.613523	0.0408066	0.0359989	0.309672	0.0623639	0.937636	0.6136	0.0408	0.036	0.3096	0.0623472	0.937653	60.1362	19.3981	5.07028	3.94407	0.012542	0.959281	3.41	4.58	0.57	100
21	543.092	8184.55	0.61655	0.0413991	0.0314029	0.310648	0.0629215	0.937079	0.6166	0.0414	0.0314	0.3107	0.0629179	0.937082	60.1124	19.3823	5.05568	3.9431	0.0116854	0.951912	3.41	4.58	0.57	100
22	544.722	8287.29	0.619284	0.0419921	0.0270967	0.311627	0.0635015	0.936498	0.6192	0.042	0.0271	0.3117	0.0635209	0.936479	60.0638	19.3498	5.02571	3.94109	0.0101587	0.93681	3.41	4.58	0.57	100
23	546.233	8389.68	0.621403	0.0425182	0.0233053	0.312774	0.0640411	0.935959	0.6216	0.0425	0.0233	0.3126	0.0639964	0.936004	60.0112	19.3148	4.99318	3.93888	0.00873536	0.92044	3.41	4.58	0.57	100
24	547.68	8479.33	0.623546	0.043112	0.0198024	0.313539	0.0646688	0.935331	0.6236	0.0431	0.0198	0.3135	0.0646468	0.935353	59.9578	19.2792	4.95998	3.93661	0.00749047	0.903733	3.41	4.58	0.57	100
25	549.014	8570.02	0.625052	0.0436285	0.0168007	0.314519	0.0652457	0.934754	0.6254	0.0436	0.0168	0.3143	0.0651719	0.934828	59.8998	19.2405	4.9238	3.93411	0.00634133	0.885538	3.41	4.58	0.57	100
26	550.176	8595.63	0.627941	0.044488	0.0141411	0.31343	0.0661601	0.93384	0.6268	0.0442	0.0141	0.315	0.0658718	0.934128	59.8416	19.2017	4.88741	3.93157	0.00536328	0.867228	3.41	4.58	0.57	100
27	551.538	8733.87	0.627518	0.044745	0.0117007	0.316037	0.0665588	0.933441	0.6279	0.0447	0.0117	0.3157	0.0664585	0.933541	59.7796	19.1604	4.84851	3.92881	0.00448713	0.847809	3.41	4.58	0.57	100
28	552.681	8759.78	0.629804	0.0456387	0.00957931	0.314978	0.0675685	0.932431	0.6288	0.0453	0.0096	0.3163	0.0672007	0.932799	59.7131	19.1161	4.80677	3.92584	0.00370881	0.826787	3.41	4.58	0.57	100
29	553.673	8781.24	0.6316	0.0464507	0.00793095	0.314018	0.0685062	0.931494	0.6294	0.0458	0.0079	0.3169	0.0678318	0.932168	59.6409	19.068	4.76132	3.92255	0.00301761	0.804059	3.41	4.58	0.57	100
30	555.079	9138.49	0.624172	0.0453451	0.0063515	0.324131	0.0677281	0.932272	0.6298	0.0464	0.0064	0.3175	0.0686188	0.931381	59.5311	18.9948	4.69214	3.91747	0.00217975	0.769356	3.41	4.58	0.57	100
31	556.103	9109.7	0.627005	0.046537	0.00509424	0.321364	0.069093	0.930907	0.6299	0.0469	0.0051	0.318	0.0692967	0.930703	59.504	18.9766	4.67517	3.91624	0.00200715	0.760548	3.41	4.58	0.57	100
32	557.144	9068.55	0.629987	0.047892	0.0039998	0.318121	0.0706498	0.92935	0.6299	0.0475	0.004	0.3185	0.0701211	0.929879	59.4234	18.9229	4.62463	3.91249	0.00159646	0.73464	3.41	4.58	0.57	100
33	557.439	9057.68	0.630789	0.0482812	0.00370299	0.317227	0.071099	0.928901	0.6299	0.0477	0.0037	0.3187	0.0703955	0.929604	59.3347	18.8638	4.56878	3.90824	0.00124187	0.706437	3.41	4.58	0.57	100
34	557.173	9089.03	0.630286	0.0477101	0.00319967	0.318804	0.0703693	0.929631	0.6303	0.0477	0.0032	0.3187	0.070354	0.929646	59.309	18.8466	4.55254	3.907	0.00114658	0.698274	3.41	4.58	0.57	100
35	557.335	9094.01	0.630887	0.0478057	0.00259929	0.318708	0.0704379	0.929562	0.6308	0.0478	0.0026	0.3188	0.0704391	0.929561	59.2356	18.7977	4.50629	3.9035	0.001	0.67488	3.41	4.58	0.57	100
36	555.702	9210.1	0.627087	0.0452045	0.00210072	0.325608	0.0672394	0.932761	0.6313	0.0478	0.0021	0.3189	0.0703873	0.929613	59.1082	18.7128	4.42592	3.89741	0.001	0.634279	3.41	4.58	0.57	100
37	557.51	9108.61	0.6306	0.0479	0.0026	0.3189	0.0706	0.9294	0.6317	0.0478	0.0016	0.3189	0.0703	0.9297	58.9513	18.6082	4.3277	3.8903	0.001	0.5832	3.41	4.58	0.57	100
38	557.59	9113.86	0.6306	0.048	0.0025	0.3189	0.0707	0.9293	0.632	0.0478	0.0012	0.319	0.0703	0.9297	58.7491	18.4734	4.2002	3.8806	0.0005	0.5187	3.41	4.58	0.57	100
39	557.66	9118.22	0.6304	0.048	0.0026	0.319	0.0708	0.9292	0.6323	0.0479	0.0008	0.319	0.0704	0.9296	58.7406	18.4678	4.1949	3.8802	0.0005	0.516	3.41	4.58	0.57	100
40	557.69	9120.22	0.6304	0.048	0.0026	0.319	0.0708	0.9292	0.6324	0.0479	0.0007	0.319	0.0704	0.9296	58.7347	18.4638	4.1912	3.8799	0.0005	0.5141	3.41	4.58	0.57	100
41	558.61	9178.98	0.6301	0.0486	0.0019	0.3194	0.0716	0.9284	0.6316	0.0485	0.0005	0.3195	0.0713	0.9287	58.6972	18.4388	4.1675	3.8781	0.0004	0.5021	3.41	4.58	0.57	100
42	559.76	9252.7	0.6295	0.0493	0.0012	0.32	0.0727	0.9273	0.6305	0.0493	0.0002	0.32	0.0725	0.9275	58.6159	18.3846	4.1163	3.8741	0.0003	0.4761	3.41	4.58	0.57	100
43	560.96	9328.12	0.6286	0.0502	0.0008	0.3205	0.0739	0.9261	0.6293	0.0501	0.0001	0.3205	0.0737	0.9263	58.514	18.3167	4.0522	3.8691	0.0002	0.4435	3.41	4.58	0.57	100
44	562.21	9406.23	0.6275	0.0511	0.0005	0.3209	0.0753	0.9247	0.628	0.051	0	0.3209	0.0751	0.9249	58.4071	18.2455	3.9851	3.8637	0.0001	0.4092	3.41	4.58	0.57	100
45	563.2	9467.91	0.6266	0.0518	0.0003	0.3213	0.0763	0.9237	0.6269	0.0517	0	0.3213	0.0762	0.9238	58.3114	18.1817	3.925	3.8588	0.0001	0.3785	3.41	4.58	0.57	100
46	564.24	9533.03	0.6255	0.0526	0.0003	0.3217	0.0775	0.9225	0.6258	0.0525	0	0.3217	0.0774	0.9226	58.2198	18.1206	3.8676	3.854	0.0001	0.349	3.41	4.58	0.57	100

[truncated: 27 more sheets: B5-6_d, B5-8_p, B5-8_d, B50-1_p, B50-1_d, B50-4_p, B50-4_d, B50-6_p, B50-6_d, B50-8_p, B50-8_d, HT5-1_p, HT5-1_d, HT5-4_p, HT5-4_d, HT5-6_p, HT5-6_d, HT5-8_p, HT5-8_d, HT50-1_p …]
