# Supplementary material
Source: MDPI journal article supplement (https://www.mdpi.com/2076-3263/11/12/505)
Supplement: s1 [file s1 › S4_All psuedos and reactions_pub.xlsx]

## Sheet: B-5_1-p
Path B 5_1 primary composition, core																							Path B 5_1 primary composition, rim
Core model reactions																							Rim model reactions
1): FSP TBi PHNG ILM CHLR ab q sph H2O = FSP TBi PHNG ILM CHLR q sph H2O																							1): TBi PHNG CHLR ab q ru sph H2O = TBi (2)PHNG CHLR ab q ru sph H2O
2): FSP TBi PHNG ILM CHLR q sph H2O = FSP TBi PHNG ILM CHLR q H2O																							2): TBi (2)PHNG CHLR ab q ru sph H2O = TBi (2)PHNG ab q ru sph H2O
3): FSP TBi PHNG ILM CHLR q H2O = FSP GARNET TBi PHNG ILM CHLR q H2O																							3): TBi (2)PHNG ab q ru sph H2O = TBi (2)PHNG ab zo q ru H2O
4): FSP GARNET TBi PHNG ILM CHLR q H2O = FSP GARNET TBi PHNG ILM CHLR STAU q H2O																							4): TBi (2)PHNG ab zo q ru H2O = FSP TBi (2)PHNG zo q ru H2O
5): FSP GARNET TBi PHNG ILM CHLR STAU q H2O = FSP GARNET TBi PHNG ILM STAU q H2O																							5): FSP TBi (2)PHNG zo q ru H2O = FSP TBi (2)PHNG CHLR q ru H2O
6): FSP GARNET TBi PHNG ILM STAU q H2O = FSP GARNET TBi PHNG ILM STAU and q H2O																							6): FSP TBi (2)PHNG CHLR q ru H2O = FSP TBi (2)PHNG ILM CHLR q ru H2O
7): FSP GARNET TBi PHNG ILM STAU and q H2O = FSP GARNET TBi PHNG ILM STAU sill q H2O																							7): FSP TBi (2)PHNG ILM CHLR q ru H2O = FSP TBi (2)PHNG ILM q ru H2O
8): FSP GARNET TBi PHNG ILM STAU sill q H2O = FSP GARNET TBi PHNG ILM sill q H2O																							8): FSP TBi (2)PHNG ILM q ru H2O = FSP TBi (2)PHNG ILM q H2O
9): FSP GARNET TBi PHNG ILM sill q H2O = FSP TBi PHNG ILM sill q H2O																							9): FSP TBi (2)PHNG ILM q H2O = FSP TBi (2)PHNG ILM STAU q H2O
10): FSP TBi PHNG ILM sill q H2O = (2)FSP TBi PHNG ILM sill q H2O																							10): FSP TBi (2)PHNG ILM STAU q H2O = FSP TBi PHNG ILM STAU q H2O
11): (2)FSP TBi PHNG ILM sill q H2O = (2)FSP TBi ILM sill q H2O																							11): FSP TBi PHNG ILM STAU q H2O = FSP TBi PHNG ILM STAU ky q H2O
12): (2)FSP TBi ILM sill q H2O = (2)FSP GARNET TBi ILM sill q H2O																							12): FSP TBi PHNG ILM STAU ky q H2O = FSP TBi PHNG ILM ky q H2O
13): TBi PHNG CHLR ab zo q sph H2O = FSP TBi PHNG CHLR ab q sph H2O																							13): FSP TBi PHNG ILM ky q H2O = FSP TBi PHNG ILM sill q H2O
14): FSP TBi PHNG CHLR ab q sph H2O = FSP TBi PHNG ILM CHLR ab q sph H2O																							14): FSP TBi PHNG ILM sill q H2O = FSP TBi PHNG ILM sill q ru H2O
15): FSP GARNET TBi PHNG ILM STAU q H2O = FSP GARNET TBi PHNG ILM STAU sill q H2O																							15): FSP TBi PHNG ILM sill q ru H2O = (2)FSP TBi PHNG ILM sill q ru H2O
16): TBi PHNG CHLR ab zo q sph H2O = GARNET TBi PHNG CHLR ab zo q sph H2O																							16): (2)FSP TBi PHNG ILM sill q ru H2O = (2)FSP TBi ILM sill q ru H2O
17): GARNET TBi PHNG CHLR ab zo q sph H2O = FSP GARNET TBi PHNG CHLR ab q sph H2O																							17): (2)FSP TBi ILM sill q ru H2O = (2)FSP TBi ILM sill q H2O
18): FSP GARNET TBi PHNG CHLR ab q sph H2O = FSP TBi PHNG CHLR ab q sph H2O																							18): FSP TBi (2)PHNG ILM q H2O = FSP GARNET TBi (2)PHNG ILM q H2O
19): FSP TBi PHNG ILM CHLR q sph H2O = FSP TBi PHNG ILM CHLR zo q sph H2O																							19): FSP GARNET TBi (2)PHNG ILM q H2O = FSP GARNET TBi (2)PHNG ILM STAU q H2O
20): FSP TBi PHNG ILM CHLR zo q sph H2O = FSP TBi PHNG ILM CHLR zo q H2O																							20): FSP GARNET TBi (2)PHNG ILM STAU q H2O = FSP TBi (2)PHNG ILM STAU q H2O
21): FSP TBi PHNG ILM CHLR zo q H2O = FSP TBi PHNG ILM CHLR q H2O																							21): FSP TBi (2)PHNG zo q ru H2O = FSP TBi (2)PHNG ILM zo q ru H2O
22): FSP GARNET TBi PHNG ILM sill q H2O = (2)FSP GARNET TBi PHNG ILM sill q H2O																							22): FSP TBi (2)PHNG ILM zo q ru H2O = FSP TBi (2)PHNG ILM q ru H2O
23): (2)FSP GARNET TBi PHNG ILM sill q H2O = (2)FSP GARNET TBi ILM sill q H2O																							23): FSP GARNET TBi (2)PHNG ILM STAU q H2O = FSP GARNET TBi PHNG ILM STAU q H2O
24): FSP GARNET TBi PHNG CHLR ab q sph H2O = FSP GARNET TBi PHNG ILM CHLR ab q sph H2O																							24): FSP GARNET TBi PHNG ILM STAU q H2O = FSP TBi PHNG ILM STAU q H2O
25): FSP GARNET TBi PHNG CHLR ab q sph H2O = FSP GARNET TBi PHNG ILM CHLR ab q sph H2O																							25): FSP TBi PHNG ILM STAU ky q H2O = FSP GARNET TBi PHNG ILM STAU ky q H2O
26): FSP GARNET TBi PHNG CHLR ab q sph H2O = FSP GARNET TBi PHNG ILM CHLR ab q sph H2O																							26): FSP GARNET TBi PHNG ILM STAU ky q H2O = FSP GARNET TBi PHNG ILM ky q H2O
27): FSP GARNET TBi PHNG CHLR ab q sph H2O = FSP GARNET TBi PHNG ILM CHLR ab q sph H2O																							27): FSP GARNET TBi PHNG ILM ky q H2O = FSP TBi PHNG ILM ky q H2O
28): FSP GARNET TBi PHNG ILM CHLR ab q sph H2O = FSP GARNET TBi PHNG ILM CHLR q sph H2O																							28): FSP GARNET TBi PHNG ILM STAU q H2O = FSP GARNET TBi PHNG ILM STAU ky q H2O
29): FSP GARNET TBi PHNG ILM CHLR ab q sph H2O = FSP GARNET TBi PHNG ILM CHLR q sph H2O																							29): FSP TBi (2)PHNG ILM zo q ru H2O = FSP GARNET TBi (2)PHNG ILM zo q ru H2O
30): FSP GARNET TBi PHNG ILM CHLR q sph H2O = FSP GARNET TBi PHNG ILM CHLR zo q sph H2O																							30): FSP GARNET TBi (2)PHNG ILM zo q ru H2O = FSP GARNET TBi (2)PHNG zo q ru H2O
31): FSP GARNET TBi PHNG ILM CHLR zo q sph H2O = FSP TBi PHNG ILM CHLR zo q sph H2O																							31): FSP GARNET TBi (2)PHNG zo q ru H2O = FSP GARNET TBi (2)PHNG q ru H2O
32): GARNET TBi PHNG CHLR ab zo q sph H2O = GARNET TBi PHNG ILM CHLR ab zo q sph H2O																							32): FSP GARNET TBi (2)PHNG q ru H2O = FSP GARNET TBi (2)PHNG ILM q ru H2O
33): GARNET TBi PHNG ILM CHLR ab zo q sph H2O = TBi PHNG ILM CHLR ab zo q sph H2O																							33): FSP GARNET TBi (2)PHNG ILM q ru H2O = FSP GARNET TBi (2)PHNG ILM q H2O
34): TBi PHNG ILM CHLR ab zo q sph H2O = TBi PHNG ILM CHLR ab zo q H2O																							34): FSP GARNET TBi (2)PHNG q ru H2O = FSP GARNET TBi PHNG q ru H2O
35): TBi PHNG ILM CHLR ab zo q H2O = FSP TBi PHNG ILM CHLR zo q H2O																							35): FSP GARNET TBi PHNG q ru H2O = FSP GARNET TBi PHNG ky q ru H2O
36): FSP TBi PHNG ILM CHLR zo q H2O = FSP GARNET TBi PHNG ILM CHLR zo q H2O																							36): FSP GARNET TBi PHNG ky q ru H2O = FSP GARNET TBi PHNG ILM ky q ru H2O
37): FSP GARNET TBi PHNG ILM CHLR zo q H2O = FSP GARNET TBi PHNG ILM CHLR q H2O																							37): FSP GARNET TBi PHNG ILM ky q ru H2O = FSP GARNET TBi PHNG ILM ky q H2O
38): FSP GARNET TBi (2)PHNG ILM CHLR q H2O = FSP GARNET TBi PHNG ILM CHLR q H2O																							38): FSP GARNET TBi PHNG ILM ky q H2O = FSP GARNET TBi PHNG ILM sill q H2O
39): FSP GARNET TBi (2)PHNG ILM CHLR q H2O = FSP GARNET TBi (2)PHNG ILM CHLR STAU q H2O																							39): FSP GARNET TBi PHNG ILM sill q H2O = FSP TBi PHNG ILM sill q H2O
40): FSP GARNET TBi (2)PHNG ILM CHLR STAU q H2O = FSP GARNET TBi (2)PHNG ILM STAU q H2O																							40): TBi (2)PHNG CHLR q ru sph H2O = TBi (2)PHNG CHLR ab q ru sph H2O
41): FSP GARNET TBi (2)PHNG ILM STAU q H2O = FSP GARNET TBi PHNG ILM STAU q H2O																							41): TBi (2)PHNG CHLR q ru sph H2O = TBi (2)PHNG q ru sph H2O
42): TBi PHNG ILM CHLR ab zo q H2O = GARNET TBi PHNG ILM CHLR ab zo q H2O																							42): TBi (2)PHNG q ru sph H2O = TBi (2)PHNG ab q ru sph H2O
43): GARNET TBi PHNG ILM CHLR ab zo q H2O = GARNET TBi (2)PHNG ILM CHLR ab zo q H2O																							43): FSP TBi (2)PHNG zo q ru H2O = FSP GARNET TBi (2)PHNG zo q ru H2O
44): GARNET TBi (2)PHNG ILM CHLR ab zo q H2O = GARNET TBi (2)PHNG ILM CHLR zo q H2O																							44): FSP GARNET TBi (2)PHNG q ru H2O = FSP GARNET TBi (2)PHNG q ru hem H2O
45): GARNET TBi (2)PHNG ILM CHLR zo q H2O = FSP GARNET TBi (2)PHNG ILM CHLR zo q H2O																							45): FSP GARNET TBi (2)PHNG q ru hem H2O = FSP GARNET TBi PHNG q ru H2O
46): FSP GARNET TBi (2)PHNG ILM CHLR zo q H2O = FSP GARNET TBi PHNG ILM CHLR zo q H2O																							46): FSP GARNET TBi (2)PHNG q ru H2O = FSP GARNET TBi PHNG q ru H2O
47): FSP GARNET TBi (2)PHNG ILM q H2O = FSP GARNET TBi (2)PHNG ILM CHLR q H2O																							47): TBi (2)PHNG ab zo q ru H2O = GARNET TBi (2)PHNG ab zo q ru H2O
48): FSP GARNET TBi (2)PHNG ILM q H2O = FSP GARNET TBi PHNG ILM q H2O																							48): GARNET TBi (2)PHNG ab zo q ru H2O = FSP GARNET TBi (2)PHNG zo q ru H2O
49): FSP GARNET TBi PHNG ILM q H2O = FSP GARNET TBi PHNG ILM STAU q H2O																							49): GARNET TBi (2)PHNG ab zo q ru H2O = GARNET TBi (2)PHNG ab q ru H2O
50): FSP GARNET TBi PHNG ILM STAU q H2O = FSP GARNET TBi PHNG ILM STAU ky q H2O																							50): GARNET TBi (2)PHNG ab q ru H2O = FSP GARNET TBi (2)PHNG ab q ru H2O
51): FSP GARNET TBi PHNG ILM STAU ky q H2O = FSP GARNET TBi PHNG ILM ky q H2O																							51): FSP GARNET TBi (2)PHNG ab q ru H2O = FSP GARNET TBi (2)PHNG q ru H2O
52): FSP GARNET TBi PHNG ILM ky q H2O = FSP GARNET TBi PHNG ILM sill q H2O																							52): FSP TBi (2)PHNG ILM CHLR q ru H2O = FSP TBi (2)PHNG ILM zo q ru H2O
53): GARNET TBi PHNG CHLR ab zo q sph H2O = GARNET TBi (2)PHNG CHLR ab zo q sph H2O																							53): FSP GARNET TBi (2)PHNG ILM zo q ru H2O = FSP GARNET TBi (2)PHNG ILM q ru H2O
54): GARNET TBi (2)PHNG CHLR ab zo q sph H2O = GARNET TBi (2)PHNG CHLR zo q sph H2O																							54): FSP GARNET TBi (2)PHNG q ru H2O = FSP GARNET TBi (2)PHNG STAU q ru H2O
55): GARNET TBi (2)PHNG CHLR zo q sph H2O = GARNET TBi (2)PHNG ILM CHLR zo q sph H2O																							55): FSP GARNET TBi (2)PHNG STAU q ru H2O = FSP GARNET TBi PHNG STAU q ru H2O
56): GARNET TBi (2)PHNG ILM CHLR zo q sph H2O = GARNET TBi (2)PHNG ILM CHLR zo q H2O																							56): FSP GARNET TBi PHNG STAU q ru H2O = FSP GARNET TBi PHNG ILM STAU q ru H2O
57): GARNET TBi (2)PHNG ILM CHLR zo q H2O = GARNET TBi (2)PHNG ILM zo q H2O																							57): FSP GARNET TBi PHNG ILM STAU q ru H2O = FSP GARNET TBi PHNG ILM ky q ru H2O
58): GARNET TBi (2)PHNG ILM zo q H2O = FSP GARNET TBi (2)PHNG ILM zo q H2O																							58): FSP GARNET TBi PHNG ILM STAU q ru H2O = FSP GARNET TBi PHNG ILM STAU q H2O
59): FSP GARNET TBi (2)PHNG ILM zo q H2O = FSP GARNET TBi (2)PHNG ILM CHLR q H2O																							59): FSP GARNET TBi PHNG ILM STAU q ru H2O = FSP GARNET TBi (2)PHNG ILM q ru H2O
60): FSP GARNET TBi PHNG ILM q ru H2O = FSP GARNET TBi PHNG ILM q H2O																							60): GARNET TBi (2)PHNG ab zo q ru H2O = FSP GARNET TBi (2)PHNG ab q ru H2O
61): FSP GARNET TBi PHNG ILM q ru H2O = FSP GARNET TBi PHNG ILM STAU q ru H2O																							61): FSP GARNET TBi (2)PHNG ILM q ru H2O = FSP GARNET TBi (2)PHNG ILM STAU q H2O
62): FSP GARNET TBi PHNG ILM STAU q ru H2O = FSP GARNET TBi PHNG ILM STAU q H2O																							62): FSP GARNET TBi PHNG q ru H2O = FSP GARNET TBi PHNG STAU q ru H2O
63): FSP GARNET TBi (2)PHNG ILM zo q H2O = FSP GARNET TBi (2)PHNG ILM zo q ru H2O																							63): FSP GARNET TBi PHNG STAU q ru H2O = FSP GARNET TBi PHNG STAU ky q ru H2O
64): FSP GARNET TBi (2)PHNG ILM zo q ru H2O = FSP GARNET TBi (2)PHNG ILM q ru H2O																							64): FSP GARNET TBi PHNG STAU ky q ru H2O = FSP GARNET TBi PHNG ky q ru H2O
65): FSP GARNET TBi (2)PHNG ILM q ru H2O = FSP GARNET TBi (2)PHNG q ru H2O																							65): FSP TBi (2)PHNG ILM zo q ru H2O = FSP GARNET TBi (2)PHNG ILM q ru H2O
66): FSP GARNET TBi (2)PHNG q ru H2O = FSP GARNET TBi PHNG q ru H2O																							66): FSP GARNET TBi (2)PHNG ILM q ru H2O = FSP TBi (2)PHNG ILM q ru H2O
67): FSP GARNET TBi PHNG q ru H2O = FSP GARNET TBi PHNG ky q ru H2O																							67): FSP TBi (2)PHNG ILM zo q ru H2O = FSP GARNET TBi (2)PHNG zo q ru H2O
68): FSP GARNET TBi PHNG ky q ru H2O = FSP GARNET TBi PHNG sill q ru H2O																							68): FSP GARNET TBi (2)PHNG ILM STAU q H2O = FSP TBi PHNG ILM STAU q H2O
69): FSP GARNET TBi PHNG sill q ru H2O = FSP GARNET TBi PHNG ILM sill q ru H2O																							69): TBi (2)PHNG ab zo q ru H2O = FSP GARNET TBi (2)PHNG zo q ru H2O
70): FSP GARNET TBi PHNG ILM sill q ru H2O = FSP GARNET TBi PHNG ILM sill q H2O																							70): FSP TBi (2)PHNG ILM q ru H2O = FSP TBi (2)PHNG ILM CHTD fep q H2O
71): GARNET TBi (2)PHNG CHLR zo q sph H2O = GARNET TBi (2)PHNG CHLR zo q ru H2O																							71): FSP TBi (2)PHNG ILM CHTD fep q H2O = FSP TBi (2)PHNG ILM q H2O
72): GARNET TBi (2)PHNG CHLR zo q ru H2O = GARNET TBi (2)PHNG ILM CHLR zo q ru H2O																							72): FSP GARNET TBi PHNG ILM ky q H2O = FSP TBi PHNG ILM sill q H2O
73): GARNET TBi (2)PHNG ILM CHLR zo q ru H2O = GARNET TBi (2)PHNG ILM CHLR zo q H2O																							73): FSP GARNET TBi PHNG ILM STAU q ru H2O = FSP GARNET TBi PHNG ILM STAU ky q H2O
74): GARNET TBi (2)PHNG ILM zo q ru H2O = GARNET TBi (2)PHNG ILM zo q H2O																							74): FSP GARNET TBi PHNG STAU q ru H2O = FSP GARNET TBi PHNG ky q ru H2O
75): GARNET TBi (2)PHNG ILM zo q ru H2O = GARNET TBi (2)PHNG ILM ab zo q ru H2O																							75): FSP GARNET TBi PHNG STAU ky q ru H2O = FSP GARNET TBi PHNG ILM ky q ru H2O
76): GARNET TBi (2)PHNG ILM ab zo q ru H2O = FSP GARNET TBi (2)PHNG ILM zo q ru H2O																							76): TBi (2)PHNG CHLR q ru sph H2O = TBi (2)PHNG ab q ru sph H2O
77): FSP GARNET TBi (2)PHNG ILM zo q ru H2O = FSP GARNET TBi (2)PHNG zo q ru H2O																							77): FSP TBi (2)PHNG zo q ru H2O = FSP TBi (2)PHNG ILM CHLR q ru H2O
78): FSP GARNET TBi (2)PHNG zo q ru H2O = FSP GARNET TBi (2)PHNG q ru H2O																							78): FSP TBi PHNG ILM STAU ky q H2O = FSP GARNET TBi PHNG ILM ky q H2O
79): GARNET TBi (2)PHNG CHLR zo q ru H2O = GARNET TBi (2)PHNG zo q ru H2O																							79): FSP GARNET TBi (2)PHNG STAU q ru H2O = FSP GARNET TBi PHNG ILM STAU q ru H2O
80): GARNET TBi (2)PHNG zo q ru H2O = GARNET TBi (2)PHNG ab zo q ru H2O																							80): FSP GARNET TBi (2)PHNG q ru H2O = FSP GARNET TBi PHNG STAU q ru H2O
81): GARNET TBi (2)PHNG ab zo q ru H2O = FSP GARNET TBi (2)PHNG zo q ru H2O																							81): FSP GARNET TBi PHNG STAU q ru H2O = FSP GARNET TBi PHNG ILM ky q ru H2O
82): GARNET (2)PHNG CHLR ab zo q sph H2O = GARNET TBi (2)PHNG CHLR ab zo q sph H2O
83): GARNET TBi (2)PHNG zo q ru H2O = GARNET TBi (2)PHNG zo q ru sph H2O
84): GARNET TBi (2)PHNG zo q ru sph H2O = GARNET TBi (2)PHNG ab zo q ru H2O
85): GARNET PHNG CHLR ab zo q sph H2O = GARNET TBi PHNG CHLR ab zo q sph H2O
86): GARNET (2)PHNG CHLR ab zo q sph H2O = GARNET PHNG CHLR ab zo q sph H2O
87): FSP GARNET TBi (2)PHNG ILM q ru H2O = FSP GARNET TBi (2)PHNG ILM q H2O
88): FSP GARNET TBi (2)PHNG ILM q ru H2O = FSP GARNET TBi (2)PHNG ILM q H2O
89): FSP GARNET TBi PHNG q ru H2O = FSP GARNET TBi PHNG ILM q ru H2O
90): FSP GARNET TBi PHNG ILM ky q H2O = FSP GARNET TBi PHNG ILM ky q ru H2O
91): FSP GARNET TBi PHNG ky q ru H2O = FSP GARNET TBi PHNG ILM ky q ru H2O
92): FSP GARNET TBi PHNG ILM CHLR ab q sph H2O = FSP TBi PHNG ILM CHLR q sph H2O
93): TBi PHNG ILM CHLR ab zo q sph H2O = FSP TBi PHNG ILM CHLR zo q sph H2O
94): GARNET TBi PHNG ILM CHLR ab zo q H2O = FSP GARNET TBi PHNG ILM CHLR zo q H2O
95): FSP GARNET TBi (2)PHNG ILM zo q H2O = FSP GARNET TBi PHNG ILM CHLR zo q H2O
96): FSP GARNET TBi (2)PHNG ILM q H2O = FSP GARNET TBi (2)PHNG ILM STAU q H2O
97): FSP GARNET TBi (2)PHNG ILM zo q H2O = FSP GARNET TBi (2)PHNG ILM q H2O
98): GARNET TBi (2)PHNG ILM CHLR zo q sph H2O = GARNET TBi (2)PHNG ILM CHLR zo q ru H2O
99): GARNET TBi (2)PHNG zo q ru H2O = GARNET TBi (2)PHNG ILM zo q ru H2O
100): GARNET TBi (2)PHNG ILM zo q H2O = GARNET TBi (2)PHNG ILM ab zo q H2O
101): GARNET TBi (2)PHNG ILM ab zo q H2O = FSP GARNET TBi (2)PHNG ILM zo q H2O
102): FSP GARNET TBi (2)PHNG ILM q ru H2O = FSP GARNET TBi (2)PHNG ILM q H2O
103): FSP GARNET TBi PHNG ILM CHLR ab q sph H2O = FSP TBi PHNG ILM CHLR ab q sph H2O
104): FSP GARNET TBi PHNG ILM CHLR ab q sph H2O = FSP TBi PHNG ILM CHLR ab q sph H2O
105): FSP GARNET TBi PHNG ILM CHLR STAU q H2O = FSP GARNET TBi (2)PHNG ILM CHLR STAU q H2O
106): FSP GARNET TBi PHNG CHLR ab q sph H2O = FSP GARNET TBi PHNG ILM CHLR q sph H2O
107): GARNET TBi PHNG ILM CHLR ab zo q sph H2O = GARNET TBi PHNG ILM CHLR ab zo q H2O
108): FSP GARNET TBi (2)PHNG ILM zo q H2O = FSP GARNET TBi (2)PHNG ILM CHLR zo q H2O
109): FSP GARNET TBi (2)PHNG ILM q ru H2O = FSP GARNET TBi PHNG ILM q ru H2O
110): FSP GARNET TBi PHNG ILM ky q ru H2O = FSP GARNET TBi PHNG ILM sill q ru H2O
111): GARNET TBi (2)PHNG ILM CHLR zo q ru H2O = GARNET TBi (2)PHNG ILM zo q ru H2O
112): GARNET TBi (2)PHNG ILM ab zo q ru H2O = GARNET TBi (2)PHNG ILM ab zo q H2O
113): GARNET TBi (2)PHNG ab zo q ru H2O = GARNET TBi (2)PHNG ILM ab zo q ru H2O
114): FSP GARNET TBi PHNG ILM CHLR STAU q H2O = FSP GARNET TBi (2)PHNG ILM STAU q H2O
115): FSP GARNET TBi PHNG CHLR ab q sph H2O = FSP TBi PHNG ILM CHLR ab q sph H2O
116): GARNET TBi PHNG ILM CHLR ab zo q sph H2O = FSP GARNET TBi PHNG ILM CHLR zo q sph H2O
117): FSP GARNET TBi PHNG ILM CHLR q sph H2O = FSP TBi PHNG ILM CHLR q sph H2O
118): GARNET TBi PHNG ILM CHLR ab zo q sph H2O = GARNET TBi (2)PHNG ILM CHLR zo q H2O
119): GARNET TBi PHNG ILM CHLR ab zo q sph H2O = TBi PHNG ILM CHLR ab zo q H2O
120): FSP GARNET TBi (2)PHNG ILM zo q H2O = FSP GARNET TBi (2)PHNG ILM CHLR q H2O
121): FSP GARNET TBi (2)PHNG ILM CHLR zo q H2O = FSP GARNET TBi (2)PHNG ILM CHLR q H2O
122): FSP GARNET TBi (2)PHNG ILM zo q H2O = FSP GARNET TBi (2)PHNG ILM CHLR zo q H2O
123): FSP GARNET TBi PHNG ILM q ru H2O = FSP GARNET TBi PHNG ILM ky q ru H2O
124): FSP GARNET TBi PHNG CHLR ab q sph H2O = FSP TBi PHNG ILM CHLR ab q sph H2O
125): FSP GARNET TBi PHNG CHLR ab q sph H2O = FSP TBi PHNG ILM CHLR ab q sph H2O
126): FSP GARNET TBi (2)PHNG ILM CHLR STAU q H2O = FSP GARNET TBi (2)PHNG ILM STAU q H2O
127): FSP GARNET TBi PHNG ILM CHLR STAU q H2O = FSP GARNET TBi (2)PHNG ILM CHLR STAU q H2O
128): FSP GARNET TBi PHNG ILM STAU ky q H2O = FSP GARNET TBi PHNG ILM STAU sill q H2O
129): (2)FSP GARNET TBi PHNG ILM sill q H2O = (2)FSP TBi PHNG ILM sill q H2O
130): FSP GARNET TBi PHNG CHLR ab q sph H2O = FSP GARNET TBi PHNG ILM CHLR ab q sph H2O
131): FSP GARNET TBi PHNG ILM CHLR ab q sph H2O = FSP GARNET TBi PHNG ILM CHLR q sph H2O
132): FSP GARNET TBi PHNG ILM CHLR q sph H2O = FSP TBi PHNG ILM CHLR zo q sph H2O
133): GARNET TBi (2)PHNG CHLR ab zo q sph H2O = GARNET TBi (2)PHNG ILM CHLR zo q sph H2O
134): FSP GARNET TBi (2)PHNG ILM CHLR q H2O = FSP GARNET TBi (2)PHNG ILM STAU q H2O
135): GARNET TBi PHNG ILM CHLR ab zo q sph H2O = GARNET TBi (2)PHNG ILM CHLR ab zo q H2O
136): FSP GARNET TBi PHNG ILM STAU q ru H2O = FSP GARNET TBi PHNG ILM ky q ru H2O
137): GARNET TBi (2)PHNG CHLR zo q sph H2O = GARNET TBi (2)PHNG ILM CHLR zo q ru H2O
138): FSP GARNET TBi PHNG ILM CHLR STAU q H2O = FSP GARNET TBi (2)PHNG ILM STAU q H2O
139): TBi PHNG CHLR ab zo q sph H2O = FSP GARNET TBi PHNG CHLR ab q sph H2O
140): GARNET TBi PHNG CHLR ab zo q sph H2O = FSP GARNET TBi PHNG ILM CHLR q sph H2O
141): TBi PHNG ILM CHLR ab zo q sph H2O = FSP TBi PHNG ILM CHLR zo q H2O
142): FSP GARNET TBi PHNG CHLR ab q sph H2O = FSP TBi PHNG ILM CHLR ab q sph H2O
143): FSP GARNET TBi PHNG ILM CHLR ab q sph H2O = FSP TBi PHNG ILM CHLR ab q sph H2O
144): FSP GARNET TBi PHNG CHLR ab q sph H2O = FSP GARNET TBi PHNG ILM CHLR ab q sph H2O
145): GARNET TBi PHNG ILM CHLR ab zo q sph H2O = GARNET TBi (2)PHNG ILM CHLR zo q sph H2O
146): TBi PHNG ILM CHLR ab zo q H2O = FSP GARNET TBi PHNG ILM CHLR zo q H2O
147): GARNET TBi (2)PHNG ILM CHLR zo q H2O = FSP GARNET TBi (2)PHNG ILM zo q H2O
148): FSP GARNET TBi (2)PHNG ILM zo q ru H2O = FSP GARNET TBi (2)PHNG q ru H2O
149): FSP GARNET TBi PHNG CHLR ab q sph H2O = FSP GARNET TBi PHNG ILM CHLR ab q sph H2O
150): FSP GARNET TBi PHNG ILM CHLR ab q sph H2O = FSP TBi PHNG ILM CHLR ab q sph H2O
151): FSP GARNET TBi PHNG CHLR ab q sph H2O = FSP TBi PHNG ILM CHLR ab q sph H2O
152): FSP GARNET TBi PHNG ILM CHLR q H2O = FSP GARNET TBi (2)PHNG ILM CHLR STAU q H2O
153): FSP GARNET TBi PHNG ILM STAU ky q H2O = FSP GARNET TBi PHNG ILM sill q H2O
154): (2)FSP GARNET TBi PHNG ILM sill q H2O = (2)FSP TBi ILM sill q H2O
155): FSP TBi PHNG CHLR ab zo q sph H2O = FSP TBi PHNG CHLR ab q sph H2O
156): TBi PHNG CHLR ab zo q sph H2O = FSP TBi PHNG CHLR ab zo q sph H2O
157): FSP GARNET TBi PHNG CHLR ab q sph H2O = FSP GARNET TBi PHNG ILM CHLR q sph H2O
158): GARNET TBi PHNG ILM CHLR ab zo q sph H2O = FSP TBi PHNG ILM CHLR zo q sph H2O
159): FSP GARNET TBi (2)PHNG ILM q H2O = FSP GARNET TBi PHNG ILM STAU q H2O
160): GARNET TBi (2)PHNG ILM CHLR ab zo q H2O = FSP GARNET TBi (2)PHNG ILM CHLR zo q H2O
161): FSP GARNET TBi PHNG ILM STAU q ru H2O = FSP GARNET TBi PHNG ILM STAU ky q H2O
162): GARNET TBi (2)PHNG ab zo q ru H2O = FSP GARNET TBi (2)PHNG ILM zo q ru H2O

## Sheet: B-5_1-d
Path B 5_1 diffused composition, core																							Path B 5_1 diffused composition, rim
																							Rim model reactions
Core model reactions																							1): TBi PHNG CHLR ab q ru sph H2O = TBi (2)PHNG CHLR ab q ru sph H2O
1): FSP TBi PHNG ILM CHLR ab q sph H2O = FSP TBi PHNG ILM CHLR q sph H2O																							2): TBi (2)PHNG CHLR ab q ru sph H2O = TBi (2)PHNG CHLR ab q sph H2O
2): FSP TBi PHNG ILM CHLR q sph H2O = FSP TBi PHNG ILM CHLR q H2O																							3): TBi (2)PHNG CHLR ab q sph H2O = TBi (2)PHNG CHLR ab zo q sph H2O
3): FSP TBi PHNG ILM CHLR q H2O = FSP GARNET TBi PHNG ILM CHLR q H2O																							4): TBi (2)PHNG CHLR ab zo q sph H2O = TBi (2)PHNG ab zo q sph H2O
4): FSP GARNET TBi PHNG ILM CHLR q H2O = FSP GARNET TBi PHNG ILM CHLR STAU q H2O																							5): TBi (2)PHNG ab zo q sph H2O = TBi (2)PHNG ab zo q ru H2O
5): FSP GARNET TBi PHNG ILM CHLR STAU q H2O = FSP GARNET TBi PHNG ILM STAU q H2O																							6): TBi (2)PHNG ab zo q ru H2O = FSP TBi (2)PHNG zo q ru H2O
6): FSP GARNET TBi PHNG ILM STAU q H2O = FSP GARNET TBi PHNG ILM STAU and q H2O																							7): FSP TBi (2)PHNG zo q ru H2O = FSP TBi (2)PHNG CHLR q ru H2O
7): FSP GARNET TBi PHNG ILM STAU and q H2O = FSP GARNET TBi PHNG ILM STAU sill q H2O																							8): FSP TBi (2)PHNG CHLR q ru H2O = FSP TBi (2)PHNG ILM CHLR q ru H2O
8): FSP GARNET TBi PHNG ILM STAU sill q H2O = FSP GARNET TBi PHNG ILM sill q H2O																							9): FSP TBi (2)PHNG ILM CHLR q ru H2O = FSP TBi (2)PHNG ILM CHLR q H2O
9): FSP GARNET TBi PHNG ILM sill q H2O = FSP TBi PHNG ILM sill q H2O																							10): FSP TBi (2)PHNG ILM CHLR q H2O = FSP TBi (2)PHNG ILM q H2O
10): FSP TBi PHNG ILM sill q H2O = (2)FSP TBi PHNG ILM sill q H2O																							11): FSP TBi (2)PHNG ILM q H2O = FSP GARNET TBi (2)PHNG ILM q H2O
11): (2)FSP TBi PHNG ILM sill q H2O = (2)FSP TBi ILM sill q H2O																							12): FSP GARNET TBi (2)PHNG ILM q H2O = FSP GARNET TBi (2)PHNG ILM STAU q H2O
12): (2)FSP TBi ILM sill q H2O = (2)FSP GARNET TBi ILM sill q H2O																							13): FSP GARNET TBi (2)PHNG ILM STAU q H2O = FSP TBi (2)PHNG ILM STAU q H2O
13): TBi PHNG CHLR ab zo q sph H2O = FSP TBi PHNG CHLR ab q sph H2O																							14): FSP TBi (2)PHNG ILM STAU q H2O = FSP TBi PHNG ILM STAU q H2O
14): FSP TBi PHNG CHLR ab q sph H2O = FSP TBi PHNG ILM CHLR ab q sph H2O																							15): FSP TBi PHNG ILM STAU q H2O = FSP TBi PHNG ILM STAU ky q H2O
15): FSP GARNET TBi PHNG ILM STAU q H2O = FSP GARNET TBi PHNG ILM STAU sill q H2O																							16): FSP TBi PHNG ILM STAU ky q H2O = FSP TBi PHNG ILM ky q H2O
16): TBi PHNG CHLR ab zo q sph H2O = GARNET TBi PHNG CHLR ab zo q sph H2O																							17): FSP TBi PHNG ILM ky q H2O = FSP TBi PHNG ILM sill q H2O
17): GARNET TBi PHNG CHLR ab zo q sph H2O = FSP GARNET TBi PHNG CHLR ab q sph H2O																							18): FSP TBi PHNG ILM sill q H2O = (2)FSP TBi PHNG ILM sill q H2O
18): FSP GARNET TBi PHNG CHLR ab q sph H2O = FSP TBi PHNG CHLR ab q sph H2O																							19): (2)FSP TBi PHNG ILM sill q H2O = (2)FSP TBi ILM sill q H2O
19): FSP TBi PHNG ILM CHLR q sph H2O = FSP TBi PHNG ILM CHLR zo q sph H2O																							20): FSP TBi (2)PHNG zo q ru H2O = FSP TBi (2)PHNG ILM zo q ru H2O
20): FSP TBi PHNG ILM CHLR zo q sph H2O = FSP TBi PHNG ILM CHLR zo q H2O																							21): FSP TBi (2)PHNG ILM zo q ru H2O = FSP TBi (2)PHNG ILM CHLR q ru H2O
21): FSP TBi PHNG ILM CHLR zo q H2O = FSP TBi PHNG ILM CHLR q H2O																							22): FSP GARNET TBi (2)PHNG ILM STAU q H2O = FSP GARNET TBi PHNG ILM STAU q H2O
22): FSP GARNET TBi PHNG ILM sill q H2O = (2)FSP GARNET TBi PHNG ILM sill q H2O																							23): FSP GARNET TBi PHNG ILM STAU q H2O = FSP TBi PHNG ILM STAU q H2O
23): (2)FSP GARNET TBi PHNG ILM sill q H2O = (2)FSP GARNET TBi ILM sill q H2O																							24): FSP TBi (2)PHNG ILM zo q ru H2O = FSP TBi (2)PHNG ILM zo q H2O
24): FSP GARNET TBi PHNG CHLR ab q sph H2O = FSP GARNET TBi PHNG ILM CHLR ab q sph H2O																							25): FSP TBi (2)PHNG ILM zo q H2O = FSP TBi (2)PHNG ILM q H2O
25): FSP GARNET TBi PHNG CHLR ab q sph H2O = FSP GARNET TBi PHNG ILM CHLR ab q sph H2O																							26): FSP TBi PHNG ILM STAU q H2O = FSP GARNET TBi PHNG ILM STAU ky q H2O
26): FSP GARNET TBi PHNG CHLR ab q sph H2O = FSP GARNET TBi PHNG ILM CHLR ab q sph H2O																							27): FSP GARNET TBi PHNG ILM STAU ky q H2O = FSP GARNET TBi PHNG ILM ky q H2O
27): FSP GARNET TBi PHNG CHLR ab q sph H2O = FSP GARNET TBi PHNG ILM CHLR ab q sph H2O																							28): FSP GARNET TBi PHNG ILM ky q H2O = FSP TBi PHNG ILM ky q H2O
28): FSP GARNET TBi PHNG ILM CHLR ab q sph H2O = FSP GARNET TBi PHNG ILM CHLR q sph H2O																							29): FSP TBi (2)PHNG ILM zo q H2O = FSP GARNET TBi (2)PHNG ILM zo q H2O
29): FSP GARNET TBi PHNG ILM CHLR ab q sph H2O = FSP GARNET TBi PHNG ILM CHLR q sph H2O																							30): FSP GARNET TBi (2)PHNG ILM zo q H2O = FSP GARNET TBi (2)PHNG ILM q H2O
30): FSP GARNET TBi PHNG ILM CHLR q sph H2O = FSP GARNET TBi PHNG ILM CHLR zo q sph H2O																							31): FSP GARNET TBi PHNG ILM STAU q H2O = FSP GARNET TBi PHNG ILM STAU ky q H2O
31): FSP GARNET TBi PHNG ILM CHLR zo q sph H2O = FSP TBi PHNG ILM CHLR zo q sph H2O																							32): FSP GARNET TBi PHNG ILM ky q H2O = FSP GARNET TBi PHNG ILM sill q H2O
32): GARNET TBi PHNG CHLR ab zo q sph H2O = GARNET TBi PHNG ILM CHLR ab zo q sph H2O																							33): FSP GARNET TBi PHNG ILM sill q H2O = FSP TBi PHNG ILM sill q H2O
33): GARNET TBi PHNG ILM CHLR ab zo q sph H2O = TBi PHNG ILM CHLR ab zo q sph H2O																							34): TBi (2)PHNG CHLR ab zo q sph H2O = TBi (2)PHNG CHLR zo q sph H2O
34): TBi PHNG ILM CHLR ab zo q sph H2O = TBi PHNG ILM CHLR ab zo q H2O																							35): TBi (2)PHNG CHLR zo q sph H2O = TBi (2)PHNG zo q sph H2O
35): TBi PHNG ILM CHLR ab zo q H2O = FSP TBi PHNG ILM CHLR zo q H2O																							36): TBi (2)PHNG zo q sph H2O = TBi (2)PHNG ab zo q sph H2O
36): FSP TBi PHNG ILM CHLR zo q H2O = FSP GARNET TBi PHNG ILM CHLR zo q H2O																							37): FSP TBi (2)PHNG ILM zo q ru H2O = FSP GARNET TBi (2)PHNG ILM zo q ru H2O
37): FSP GARNET TBi PHNG ILM CHLR zo q H2O = FSP GARNET TBi PHNG ILM CHLR q H2O																							38): FSP GARNET TBi (2)PHNG ILM zo q ru H2O = FSP GARNET TBi (2)PHNG zo q ru H2O
38): FSP GARNET TBi (2)PHNG ILM CHLR q H2O = FSP GARNET TBi PHNG ILM CHLR q H2O																							39): FSP GARNET TBi (2)PHNG zo q ru H2O = FSP GARNET TBi (2)PHNG q ru H2O
39): FSP GARNET TBi (2)PHNG ILM CHLR q H2O = FSP GARNET TBi (2)PHNG ILM CHLR STAU q H2O																							40): FSP GARNET TBi (2)PHNG q ru H2O = FSP GARNET TBi (2)PHNG ILM q ru H2O
40): FSP GARNET TBi (2)PHNG ILM CHLR STAU q H2O = FSP GARNET TBi (2)PHNG ILM STAU q H2O																							41): FSP GARNET TBi (2)PHNG ILM q ru H2O = FSP GARNET TBi (2)PHNG ILM q H2O
41): FSP GARNET TBi (2)PHNG ILM STAU q H2O = FSP GARNET TBi PHNG ILM STAU q H2O																							42): FSP GARNET TBi (2)PHNG q ru H2O = FSP GARNET TBi PHNG q ru H2O
42): TBi PHNG ILM CHLR ab zo q H2O = GARNET TBi PHNG ILM CHLR ab zo q H2O																							43): FSP GARNET TBi PHNG q ru H2O = FSP GARNET TBi PHNG ky q ru H2O
43): GARNET TBi PHNG ILM CHLR ab zo q H2O = GARNET TBi (2)PHNG ILM CHLR ab zo q H2O																							44): FSP GARNET TBi PHNG ky q ru H2O = FSP GARNET TBi PHNG ILM ky q ru H2O
44): GARNET TBi (2)PHNG ILM CHLR ab zo q H2O = GARNET TBi (2)PHNG ILM CHLR zo q H2O																							45): FSP GARNET TBi PHNG ILM ky q ru H2O = FSP GARNET TBi PHNG ILM ky q H2O
45): GARNET TBi (2)PHNG ILM CHLR zo q H2O = FSP GARNET TBi (2)PHNG ILM CHLR zo q H2O																							46): FSP TBi (2)PHNG zo q ru H2O = FSP GARNET TBi (2)PHNG zo q ru H2O
46): FSP GARNET TBi (2)PHNG ILM CHLR zo q H2O = FSP GARNET TBi PHNG ILM CHLR zo q H2O																							47): TBi (2)PHNG ab zo q ru H2O = GARNET TBi (2)PHNG ab zo q ru H2O
47): FSP GARNET TBi (2)PHNG ILM q H2O = FSP GARNET TBi (2)PHNG ILM CHLR q H2O																							48): GARNET TBi (2)PHNG ab zo q ru H2O = FSP GARNET TBi (2)PHNG zo q ru H2O
48): FSP GARNET TBi (2)PHNG ILM q H2O = FSP GARNET TBi PHNG ILM q H2O																							49): TBi (2)PHNG CHLR q sph H2O = TBi (2)PHNG CHLR zo q sph H2O
49): FSP GARNET TBi PHNG ILM q H2O = FSP GARNET TBi PHNG ILM STAU q H2O																							50): TBi (2)PHNG CHLR zo q sph H2O = TBi (2)PHNG zo q ru sph H2O
50): FSP GARNET TBi PHNG ILM STAU q H2O = FSP GARNET TBi PHNG ILM STAU ky q H2O																							51): TBi (2)PHNG zo q ru sph H2O = TBi (2)PHNG zo q sph H2O
51): FSP GARNET TBi PHNG ILM STAU ky q H2O = FSP GARNET TBi PHNG ILM ky q H2O																							52): GARNET TBi (2)PHNG ab zo q ru H2O = GARNET TBi (2)PHNG ab q ru H2O
52): FSP GARNET TBi PHNG ILM ky q H2O = FSP GARNET TBi PHNG ILM sill q H2O																							53): GARNET TBi (2)PHNG ab q ru H2O = FSP GARNET TBi (2)PHNG ab q ru H2O
53): GARNET TBi PHNG CHLR ab zo q sph H2O = GARNET TBi (2)PHNG CHLR ab zo q sph H2O																							54): FSP GARNET TBi (2)PHNG ab q ru H2O = FSP GARNET TBi (2)PHNG q ru H2O
54): GARNET TBi (2)PHNG CHLR ab zo q sph H2O = GARNET TBi (2)PHNG CHLR zo q sph H2O																							55): TBi (2)PHNG CHLR zo q ru sph H2O = TBi (2)PHNG zo q ru sph H2O
55): GARNET TBi (2)PHNG CHLR zo q sph H2O = GARNET TBi (2)PHNG ILM CHLR zo q sph H2O																							56): TBi (2)PHNG CHLR zo q ru sph H2O = TBi (2)PHNG CHLR zo q sph H2O
56): GARNET TBi (2)PHNG ILM CHLR zo q sph H2O = GARNET TBi (2)PHNG ILM CHLR zo q H2O																							57): FSP TBi PHNG ILM STAU ky q H2O = FSP GARNET TBi PHNG ILM STAU ky q H2O
57): GARNET TBi (2)PHNG ILM CHLR zo q H2O = GARNET TBi (2)PHNG ILM zo q H2O																							58): FSP TBi (2)PHNG zo q ru H2O = FSP TBi (2)PHNG CHLR zo q ru H2O
58): GARNET TBi (2)PHNG ILM zo q H2O = FSP GARNET TBi (2)PHNG ILM zo q H2O																							59): FSP TBi (2)PHNG zo q ru H2O = FSP TBi (2)PHNG CHLR zo q ru H2O
59): FSP GARNET TBi (2)PHNG ILM zo q H2O = FSP GARNET TBi (2)PHNG ILM CHLR q H2O																							60): FSP TBi (2)PHNG CHLR zo q ru H2O = FSP TBi (2)PHNG CHLR q ru H2O
60): FSP GARNET TBi PHNG ILM q ru H2O = FSP GARNET TBi PHNG ILM q H2O																							61): FSP TBi (2)PHNG CHLR zo q ru H2O = FSP TBi (2)PHNG CHLR q ru H2O
61): FSP GARNET TBi PHNG ILM q ru H2O = FSP GARNET TBi PHNG ILM STAU q ru H2O																							62): FSP TBi (2)PHNG ILM CHLR q H2O = FSP TBi (2)PHNG ILM zo q H2O
62): FSP GARNET TBi PHNG ILM STAU q ru H2O = FSP GARNET TBi PHNG ILM STAU q H2O																							63): FSP GARNET TBi PHNG q ru H2O = FSP GARNET TBi PHNG STAU q ru H2O
63): FSP GARNET TBi (2)PHNG ILM zo q H2O = FSP GARNET TBi (2)PHNG ILM zo q ru H2O																							64): FSP GARNET TBi PHNG STAU q ru H2O = FSP GARNET TBi PHNG STAU ky q ru H2O
64): FSP GARNET TBi (2)PHNG ILM zo q ru H2O = FSP GARNET TBi (2)PHNG ILM q ru H2O																							65): FSP GARNET TBi PHNG STAU ky q ru H2O = FSP GARNET TBi PHNG ky q ru H2O
65): FSP GARNET TBi (2)PHNG ILM q ru H2O = FSP GARNET TBi (2)PHNG q ru H2O																							66): FSP GARNET TBi PHNG ILM STAU q H2O = FSP GARNET TBi PHNG ILM STAU q ru H2O
66): FSP GARNET TBi (2)PHNG q ru H2O = FSP GARNET TBi PHNG q ru H2O																							67): FSP GARNET TBi PHNG STAU q ru H2O = FSP GARNET TBi PHNG ILM STAU q ru H2O
67): FSP GARNET TBi PHNG q ru H2O = FSP GARNET TBi PHNG ky q ru H2O																							68): FSP GARNET TBi (2)PHNG ILM zo q H2O = FSP GARNET TBi (2)PHNG ILM zo q ru H2O
68): FSP GARNET TBi PHNG ky q ru H2O = FSP GARNET TBi PHNG sill q ru H2O																							69): FSP GARNET TBi (2)PHNG ILM zo q ru H2O = FSP GARNET TBi (2)PHNG ILM q ru H2O
69): FSP GARNET TBi PHNG sill q ru H2O = FSP GARNET TBi PHNG ILM sill q ru H2O																							70): TBi (2)PHNG CHLR zo q sph H2O = TBi (2)PHNG zo q ru sph H2O
70): FSP GARNET TBi PHNG ILM sill q ru H2O = FSP GARNET TBi PHNG ILM sill q H2O																							71): GARNET TBi (2)PHNG ab zo q ru H2O = FSP GARNET TBi (2)PHNG ab q ru H2O
71): GARNET TBi (2)PHNG CHLR zo q sph H2O = GARNET TBi (2)PHNG CHLR zo q ru H2O																							72): FSP TBi (2)PHNG zo q ru H2O = FSP TBi (2)PHNG CHLR q ru H2O
72): GARNET TBi (2)PHNG CHLR zo q ru H2O = GARNET TBi (2)PHNG ILM CHLR zo q ru H2O																							73): FSP GARNET TBi (2)PHNG ILM q ru H2O = FSP GARNET TBi PHNG ILM q ru H2O
73): GARNET TBi (2)PHNG ILM CHLR zo q ru H2O = GARNET TBi (2)PHNG ILM CHLR zo q H2O																							74): FSP GARNET TBi PHNG ILM q ru H2O = FSP GARNET TBi PHNG q ru H2O
74): GARNET TBi (2)PHNG ILM zo q ru H2O = GARNET TBi (2)PHNG ILM zo q H2O																							75): FSP GARNET TBi PHNG ILM STAU q ru H2O = FSP GARNET TBi PHNG ILM STAU ky q H2O
75): GARNET TBi (2)PHNG ILM zo q ru H2O = GARNET TBi (2)PHNG ILM ab zo q ru H2O																							76): FSP GARNET TBi (2)PHNG ILM q ru H2O = FSP GARNET TBi (2)PHNG ILM STAU q H2O
76): GARNET TBi (2)PHNG ILM ab zo q ru H2O = FSP GARNET TBi (2)PHNG ILM zo q ru H2O																							77): FSP GARNET TBi PHNG ILM STAU q ru H2O = FSP GARNET TBi (2)PHNG ILM STAU q ru H2O
77): FSP GARNET TBi (2)PHNG ILM zo q ru H2O = FSP GARNET TBi (2)PHNG zo q ru H2O																							78): FSP GARNET TBi (2)PHNG ILM q ru H2O = FSP GARNET TBi (2)PHNG ILM STAU q ru H2O
78): FSP GARNET TBi (2)PHNG zo q ru H2O = FSP GARNET TBi (2)PHNG q ru H2O																							79): FSP GARNET TBi (2)PHNG ILM STAU q H2O = FSP TBi PHNG ILM STAU q H2O
79): GARNET TBi (2)PHNG CHLR zo q ru H2O = GARNET TBi (2)PHNG zo q ru H2O																							80): FSP TBi (2)PHNG ILM zo q ru H2O = FSP GARNET TBi (2)PHNG ILM zo q H2O
80): GARNET TBi (2)PHNG zo q ru H2O = GARNET TBi (2)PHNG ab zo q ru H2O																							81): FSP GARNET TBi PHNG ILM STAU q ru H2O = FSP GARNET TBi PHNG ILM ky q ru H2O
81): GARNET TBi (2)PHNG ab zo q ru H2O = FSP GARNET TBi (2)PHNG zo q ru H2O																							82): FSP GARNET TBi (2)PHNG ILM zo q H2O = FSP GARNET TBi (2)PHNG ILM q ru H2O
82): GARNET (2)PHNG CHLR ab zo q sph H2O = GARNET TBi (2)PHNG CHLR ab zo q sph H2O																							83): FSP TBi (2)PHNG zo q ru H2O = FSP TBi (2)PHNG CHLR q ru H2O
83): GARNET TBi (2)PHNG zo q ru H2O = GARNET TBi (2)PHNG zo q ru sph H2O																							84): FSP GARNET TBi (2)PHNG ILM q ru H2O = FSP GARNET TBi PHNG ILM STAU q ru H2O
84): GARNET TBi (2)PHNG zo q ru sph H2O = GARNET TBi (2)PHNG ab zo q ru H2O																							85): FSP GARNET TBi PHNG ILM STAU q ru H2O = FSP GARNET TBi PHNG ILM ky q H2O
85): GARNET PHNG CHLR ab zo q sph H2O = GARNET TBi PHNG CHLR ab zo q sph H2O																							86): GARNET TBi (2)PHNG ab zo q ru H2O = FSP GARNET TBi (2)PHNG q ru H2O
86): GARNET (2)PHNG CHLR ab zo q sph H2O = GARNET PHNG CHLR ab zo q sph H2O																							87): FSP TBi (2)PHNG zo q ru H2O = FSP TBi (2)PHNG ILM CHLR q ru H2O
87): FSP GARNET TBi (2)PHNG ILM q ru H2O = FSP GARNET TBi (2)PHNG ILM q H2O																							88): FSP GARNET TBi PHNG ILM ky q H2O = FSP TBi PHNG ILM STAU ky q H2O
88): FSP GARNET TBi (2)PHNG ILM q ru H2O = FSP GARNET TBi (2)PHNG ILM q H2O																							89): FSP GARNET TBi (2)PHNG ILM STAU q ru H2O = FSP GARNET TBi (2)PHNG ILM STAU q H2O
89): FSP GARNET TBi PHNG q ru H2O = FSP GARNET TBi PHNG ILM q ru H2O																							90): FSP GARNET TBi PHNG STAU q ru H2O = FSP GARNET TBi PHNG ky q ru H2O
90): FSP GARNET TBi PHNG ILM ky q H2O = FSP GARNET TBi PHNG ILM ky q ru H2O																							91): FSP GARNET TBi PHNG STAU ky q ru H2O = FSP GARNET TBi PHNG ILM ky q ru H2O
91): FSP GARNET TBi PHNG ky q ru H2O = FSP GARNET TBi PHNG ILM ky q ru H2O																							92): FSP GARNET TBi PHNG ILM q ru H2O = FSP GARNET TBi PHNG ILM STAU q ru H2O
92): FSP GARNET TBi PHNG ILM CHLR ab q sph H2O = FSP TBi PHNG ILM CHLR q sph H2O
93): TBi PHNG ILM CHLR ab zo q sph H2O = FSP TBi PHNG ILM CHLR zo q sph H2O
94): GARNET TBi PHNG ILM CHLR ab zo q H2O = FSP GARNET TBi PHNG ILM CHLR zo q H2O
95): FSP GARNET TBi (2)PHNG ILM zo q H2O = FSP GARNET TBi PHNG ILM CHLR zo q H2O
96): FSP GARNET TBi (2)PHNG ILM q H2O = FSP GARNET TBi (2)PHNG ILM STAU q H2O
97): FSP GARNET TBi (2)PHNG ILM zo q H2O = FSP GARNET TBi (2)PHNG ILM q H2O
98): GARNET TBi (2)PHNG ILM CHLR zo q sph H2O = GARNET TBi (2)PHNG ILM CHLR zo q ru H2O
99): GARNET TBi (2)PHNG zo q ru H2O = GARNET TBi (2)PHNG ILM zo q ru H2O
100): GARNET TBi (2)PHNG ILM zo q H2O = GARNET TBi (2)PHNG ILM ab zo q H2O
101): GARNET TBi (2)PHNG ILM ab zo q H2O = FSP GARNET TBi (2)PHNG ILM zo q H2O
102): FSP GARNET TBi (2)PHNG ILM q ru H2O = FSP GARNET TBi (2)PHNG ILM q H2O
103): FSP GARNET TBi PHNG ILM CHLR ab q sph H2O = FSP TBi PHNG ILM CHLR ab q sph H2O
104): FSP GARNET TBi PHNG ILM CHLR ab q sph H2O = FSP TBi PHNG ILM CHLR ab q sph H2O
105): FSP GARNET TBi PHNG ILM CHLR STAU q H2O = FSP GARNET TBi (2)PHNG ILM CHLR STAU q H2O
106): FSP GARNET TBi PHNG CHLR ab q sph H2O = FSP GARNET TBi PHNG ILM CHLR q sph H2O
107): GARNET TBi PHNG ILM CHLR ab zo q sph H2O = GARNET TBi PHNG ILM CHLR ab zo q H2O
108): FSP GARNET TBi (2)PHNG ILM zo q H2O = FSP GARNET TBi (2)PHNG ILM CHLR zo q H2O
109): FSP GARNET TBi (2)PHNG ILM q ru H2O = FSP GARNET TBi PHNG ILM q ru H2O
110): FSP GARNET TBi PHNG ILM ky q ru H2O = FSP GARNET TBi PHNG ILM sill q ru H2O
111): GARNET TBi (2)PHNG ILM CHLR zo q ru H2O = GARNET TBi (2)PHNG ILM zo q ru H2O
112): GARNET TBi (2)PHNG ILM ab zo q ru H2O = GARNET TBi (2)PHNG ILM ab zo q H2O
113): GARNET TBi (2)PHNG ab zo q ru H2O = GARNET TBi (2)PHNG ILM ab zo q ru H2O
114): FSP GARNET TBi PHNG ILM CHLR STAU q H2O = FSP GARNET TBi (2)PHNG ILM STAU q H2O
115): FSP GARNET TBi PHNG CHLR ab q sph H2O = FSP TBi PHNG ILM CHLR ab q sph H2O
116): GARNET TBi PHNG ILM CHLR ab zo q sph H2O = FSP GARNET TBi PHNG ILM CHLR zo q sph H2O
117): FSP GARNET TBi PHNG ILM CHLR q sph H2O = FSP TBi PHNG ILM CHLR q sph H2O
118): GARNET TBi PHNG ILM CHLR ab zo q sph H2O = GARNET TBi (2)PHNG ILM CHLR zo q H2O
119): GARNET TBi PHNG ILM CHLR ab zo q sph H2O = TBi PHNG ILM CHLR ab zo q H2O
120): FSP GARNET TBi (2)PHNG ILM zo q H2O = FSP GARNET TBi (2)PHNG ILM CHLR q H2O
121): FSP GARNET TBi (2)PHNG ILM CHLR zo q H2O = FSP GARNET TBi (2)PHNG ILM CHLR q H2O
122): FSP GARNET TBi (2)PHNG ILM zo q H2O = FSP GARNET TBi (2)PHNG ILM CHLR zo q H2O
123): FSP GARNET TBi PHNG ILM q ru H2O = FSP GARNET TBi PHNG ILM ky q ru H2O
124): FSP GARNET TBi PHNG CHLR ab q sph H2O = FSP TBi PHNG ILM CHLR ab q sph H2O
125): FSP GARNET TBi PHNG CHLR ab q sph H2O = FSP TBi PHNG ILM CHLR ab q sph H2O
126): FSP GARNET TBi (2)PHNG ILM CHLR STAU q H2O = FSP GARNET TBi (2)PHNG ILM STAU q H2O
127): FSP GARNET TBi PHNG ILM CHLR STAU q H2O = FSP GARNET TBi (2)PHNG ILM CHLR STAU q H2O
128): FSP GARNET TBi PHNG ILM STAU ky q H2O = FSP GARNET TBi PHNG ILM STAU sill q H2O
129): (2)FSP GARNET TBi PHNG ILM sill q H2O = (2)FSP TBi PHNG ILM sill q H2O
130): FSP GARNET TBi PHNG CHLR ab q sph H2O = FSP GARNET TBi PHNG ILM CHLR ab q sph H2O
131): FSP GARNET TBi PHNG ILM CHLR ab q sph H2O = FSP GARNET TBi PHNG ILM CHLR q sph H2O
132): FSP GARNET TBi PHNG ILM CHLR q sph H2O = FSP TBi PHNG ILM CHLR zo q sph H2O
133): GARNET TBi (2)PHNG CHLR ab zo q sph H2O = GARNET TBi (2)PHNG ILM CHLR zo q sph H2O
134): FSP GARNET TBi (2)PHNG ILM CHLR q H2O = FSP GARNET TBi (2)PHNG ILM STAU q H2O
135): GARNET TBi PHNG ILM CHLR ab zo q sph H2O = GARNET TBi (2)PHNG ILM CHLR ab zo q H2O
136): FSP GARNET TBi PHNG ILM STAU q ru H2O = FSP GARNET TBi PHNG ILM ky q ru H2O
137): GARNET TBi (2)PHNG CHLR zo q sph H2O = GARNET TBi (2)PHNG ILM CHLR zo q ru H2O
138): FSP GARNET TBi PHNG ILM CHLR STAU q H2O = FSP GARNET TBi (2)PHNG ILM STAU q H2O
139): TBi PHNG CHLR ab zo q sph H2O = FSP GARNET TBi PHNG CHLR ab q sph H2O
140): GARNET TBi PHNG CHLR ab zo q sph H2O = FSP GARNET TBi PHNG ILM CHLR q sph H2O
141): TBi PHNG ILM CHLR ab zo q sph H2O = FSP TBi PHNG ILM CHLR zo q H2O
142): FSP GARNET TBi PHNG CHLR ab q sph H2O = FSP TBi PHNG ILM CHLR ab q sph H2O
143): FSP GARNET TBi PHNG ILM CHLR ab q sph H2O = FSP TBi PHNG ILM CHLR ab q sph H2O
144): FSP GARNET TBi PHNG CHLR ab q sph H2O = FSP GARNET TBi PHNG ILM CHLR ab q sph H2O
145): GARNET TBi PHNG ILM CHLR ab zo q sph H2O = GARNET TBi (2)PHNG ILM CHLR zo q sph H2O
146): TBi PHNG ILM CHLR ab zo q H2O = FSP GARNET TBi PHNG ILM CHLR zo q H2O
147): GARNET TBi (2)PHNG ILM CHLR zo q H2O = FSP GARNET TBi (2)PHNG ILM zo q H2O
148): FSP GARNET TBi (2)PHNG ILM zo q ru H2O = FSP GARNET TBi (2)PHNG q ru H2O
149): FSP GARNET TBi PHNG CHLR ab q sph H2O = FSP GARNET TBi PHNG ILM CHLR ab q sph H2O
150): FSP GARNET TBi PHNG ILM CHLR ab q sph H2O = FSP TBi PHNG ILM CHLR ab q sph H2O
151): FSP GARNET TBi PHNG CHLR ab q sph H2O = FSP TBi PHNG ILM CHLR ab q sph H2O
152): FSP GARNET TBi PHNG ILM CHLR q H2O = FSP GARNET TBi (2)PHNG ILM CHLR STAU q H2O
153): FSP GARNET TBi PHNG ILM STAU ky q H2O = FSP GARNET TBi PHNG ILM sill q H2O
154): (2)FSP GARNET TBi PHNG ILM sill q H2O = (2)FSP TBi ILM sill q H2O
155): FSP TBi PHNG CHLR ab zo q sph H2O = FSP TBi PHNG CHLR ab q sph H2O
156): TBi PHNG CHLR ab zo q sph H2O = FSP TBi PHNG CHLR ab zo q sph H2O
157): FSP GARNET TBi PHNG CHLR ab q sph H2O = FSP GARNET TBi PHNG ILM CHLR q sph H2O
158): GARNET TBi PHNG ILM CHLR ab zo q sph H2O = FSP TBi PHNG ILM CHLR zo q sph H2O
159): FSP GARNET TBi (2)PHNG ILM q H2O = FSP GARNET TBi PHNG ILM STAU q H2O
160): GARNET TBi (2)PHNG ILM CHLR ab zo q H2O = FSP GARNET TBi (2)PHNG ILM CHLR zo q H2O
161): FSP GARNET TBi PHNG ILM STAU q ru H2O = FSP GARNET TBi PHNG ILM STAU ky q H2O
162): GARNET TBi (2)PHNG ab zo q ru H2O = FSP GARNET TBi (2)PHNG ILM zo q ru H2O

## Sheet: B-5_4-p
Path B 5_4 primary composition, core																							Path B 5_4 primary composition, rim
Core model reactions																							Rim model reactions
1): FSP TBi PHNG ILM CHLR ab q sph H2O = FSP TBi PHNG ILM CHLR q sph H2O																							1): TBi PHNG CHLR ab q ru sph H2O = TBi (2)PHNG CHLR ab q ru sph H2O
2): FSP TBi PHNG ILM CHLR q sph H2O = FSP TBi PHNG ILM CHLR q ru sph H2O																							2): TBi (2)PHNG CHLR ab q ru sph H2O = TBi (2)PHNG ab q ru sph H2O
3): FSP TBi PHNG ILM CHLR q ru sph H2O = FSP TBi PHNG ILM CHLR q ru H2O																							3): TBi (2)PHNG ab q ru sph H2O = TBi (2)PHNG ab zo q ru H2O
4): FSP TBi PHNG ILM CHLR q ru H2O = FSP TBi PHNG ILM CHLR q H2O																							4): TBi (2)PHNG ab zo q ru H2O = FSP TBi (2)PHNG ab q ru H2O
5): FSP TBi PHNG ILM CHLR q H2O = FSP GARNET TBi PHNG ILM CHLR q H2O																							5): FSP TBi (2)PHNG ab q ru H2O = FSP TBi (2)PHNG q ru H2O
6): FSP GARNET TBi PHNG ILM CHLR q H2O = FSP GARNET TBi PHNG ILM CHLR STAU q H2O																							6): FSP TBi (2)PHNG q ru H2O = FSP TBi (2)PHNG ILM q ru H2O
7): FSP GARNET TBi PHNG ILM CHLR STAU q H2O = FSP GARNET TBi PHNG ILM STAU q H2O																							7): FSP TBi (2)PHNG ILM q ru H2O = FSP TBi (2)PHNG ILM q H2O
8): FSP GARNET TBi PHNG ILM STAU q H2O = FSP GARNET TBi PHNG ILM STAU and q H2O																							8): FSP TBi (2)PHNG ILM q H2O = FSP TBi (2)PHNG ILM STAU q H2O
9): FSP GARNET TBi PHNG ILM STAU and q H2O = FSP GARNET TBi PHNG ILM STAU sill q H2O																							9): FSP TBi (2)PHNG ILM STAU q H2O = FSP TBi PHNG ILM STAU q H2O
10): FSP GARNET TBi PHNG ILM STAU sill q H2O = FSP GARNET TBi PHNG ILM sill q H2O																							10): FSP TBi PHNG ILM STAU q H2O = FSP TBi PHNG ILM STAU ky q H2O
11): FSP GARNET TBi PHNG ILM sill q H2O = FSP TBi PHNG ILM sill q H2O																							11): FSP TBi PHNG ILM STAU ky q H2O = FSP TBi PHNG ILM ky q H2O
12): FSP TBi PHNG ILM sill q H2O = (2)FSP TBi PHNG ILM sill q H2O																							12): FSP TBi PHNG ILM ky q H2O = FSP TBi PHNG ILM sill q H2O
13): (2)FSP TBi PHNG ILM sill q H2O = (2)FSP TBi ILM sill q H2O																							13): FSP TBi PHNG ILM sill q H2O = FSP TBi PHNG ILM sill q ru H2O
14): (2)FSP TBi ILM sill q H2O = (2)FSP GARNET TBi ILM sill q H2O																							14): FSP TBi PHNG ILM sill q ru H2O = FSP TBi PHNG sill q ru H2O
15): TBi PHNG CHLR ab zo q sph H2O = FSP TBi PHNG CHLR ab q sph H2O																							15): FSP TBi PHNG sill q ru H2O = (2)FSP TBi PHNG sill q ru H2O
16): FSP TBi PHNG CHLR ab q sph H2O = FSP TBi PHNG ILM CHLR ab q sph H2O																							16): (2)FSP TBi PHNG sill q ru H2O = (2)FSP TBi sill q ru H2O
17): FSP TBi PHNG ILM CHLR q sph H2O = FSP TBi PHNG ILM CHLR q H2O																							17): (2)FSP TBi sill q ru H2O = (2)FSP TBi ILM sill q ru H2O
18): FSP GARNET TBi PHNG ILM STAU q H2O = FSP GARNET TBi PHNG ILM STAU sill q H2O																							18): (2)FSP TBi ILM sill q ru H2O = (2)FSP TBi ILM sill q H2O
19): FSP TBi PHNG ILM CHLR q sph H2O = FSP TBi PHNG ILM CHLR zo q sph H2O																							19): TBi (2)PHNG ab zo q ru H2O = FSP TBi (2)PHNG zo q ru H2O
20): FSP TBi PHNG ILM CHLR zo q sph H2O = FSP TBi PHNG ILM CHLR zo q H2O																							20): FSP TBi (2)PHNG zo q ru H2O = FSP TBi (2)PHNG q ru H2O
21): FSP TBi PHNG ILM CHLR zo q H2O = FSP TBi PHNG ILM CHLR q H2O																							21): FSP TBi (2)PHNG ILM q H2O = FSP GARNET TBi (2)PHNG ILM q H2O
22): FSP GARNET TBi PHNG ILM sill q H2O = (2)FSP GARNET TBi PHNG ILM sill q H2O																							22): FSP GARNET TBi (2)PHNG ILM q H2O = FSP GARNET TBi (2)PHNG ILM STAU q H2O
23): (2)FSP GARNET TBi PHNG ILM sill q H2O = (2)FSP GARNET TBi ILM sill q H2O																							23): FSP GARNET TBi (2)PHNG ILM STAU q H2O = FSP TBi (2)PHNG ILM STAU q H2O
24): TBi PHNG CHLR ab zo q sph H2O = GARNET TBi PHNG CHLR ab zo q sph H2O																							24): FSP TBi PHNG ILM STAU ky q H2O = FSP GARNET TBi PHNG ILM STAU ky q H2O
25): GARNET TBi PHNG CHLR ab zo q sph H2O = FSP GARNET TBi PHNG CHLR ab q sph H2O																							25): FSP GARNET TBi PHNG ILM STAU ky q H2O = FSP GARNET TBi PHNG ILM ky q H2O
26): FSP GARNET TBi PHNG CHLR ab q sph H2O = FSP GARNET TBi PHNG ILM CHLR q sph H2O																							26): FSP GARNET TBi PHNG ILM ky q H2O = FSP TBi PHNG ILM ky q H2O
27): FSP GARNET TBi PHNG CHLR ab q sph H2O = FSP GARNET TBi PHNG ILM CHLR q sph H2O																							27): FSP TBi PHNG ILM ky q H2O = FSP TBi PHNG ILM ky q ru H2O
28): FSP GARNET TBi PHNG ILM CHLR q sph H2O = FSP GARNET TBi PHNG ILM CHLR zo q sph H2O																							28): FSP TBi PHNG ILM ky q ru H2O = FSP TBi PHNG ILM sill q ru H2O
29): FSP GARNET TBi PHNG ILM CHLR zo q sph H2O = FSP TBi PHNG ILM CHLR zo q sph H2O																							29): FSP GARNET TBi (2)PHNG ILM q H2O = FSP GARNET TBi (2)PHNG ILM q ru H2O
30): GARNET TBi PHNG CHLR ab zo q sph H2O = GARNET TBi PHNG ILM CHLR ab zo q sph H2O																							30): FSP GARNET TBi (2)PHNG ILM q ru H2O = FSP GARNET TBi (2)PHNG ILM ky q H2O
31): GARNET TBi PHNG ILM CHLR ab zo q sph H2O = TBi PHNG ILM CHLR ab zo q sph H2O																							31): FSP GARNET TBi (2)PHNG ILM ky q H2O = FSP GARNET TBi PHNG ILM ky q H2O
32): TBi PHNG ILM CHLR ab zo q sph H2O = TBi PHNG ILM CHLR ab zo q H2O																							32): FSP GARNET TBi (2)PHNG ILM q ru H2O = FSP GARNET TBi (2)PHNG q ru H2O
33): TBi PHNG ILM CHLR ab zo q H2O = FSP TBi PHNG ILM CHLR zo q H2O																							33): FSP GARNET TBi (2)PHNG q ru H2O = FSP GARNET TBi (2)PHNG ky q ru H2O
34): FSP TBi PHNG ILM CHLR zo q H2O = FSP GARNET TBi PHNG ILM CHLR zo q H2O																							34): FSP GARNET TBi (2)PHNG ky q ru H2O = FSP GARNET TBi PHNG ky q ru H2O
35): FSP GARNET TBi PHNG ILM CHLR zo q H2O = FSP GARNET TBi PHNG ILM CHLR q H2O																							35): FSP GARNET TBi PHNG ky q ru H2O = FSP GARNET TBi PHNG ILM ky q ru H2O
36): FSP GARNET TBi PHNG ILM CHLR q H2O = FSP GARNET TBi (2)PHNG ILM CHLR q H2O																							36): FSP GARNET TBi PHNG ILM ky q ru H2O = FSP GARNET TBi PHNG ILM ky q H2O
37): FSP GARNET TBi (2)PHNG ILM CHLR q H2O = FSP GARNET TBi (2)PHNG ILM CHLR STAU q H2O																							37): FSP GARNET TBi (2)PHNG q ru H2O = FSP GARNET TBi PHNG q ru H2O
38): FSP GARNET TBi (2)PHNG ILM CHLR STAU q H2O = FSP GARNET TBi (2)PHNG ILM STAU q H2O																							38): FSP GARNET TBi PHNG q ru H2O = FSP GARNET TBi PHNG ky q ru H2O
39): FSP GARNET TBi (2)PHNG ILM STAU q H2O = FSP GARNET TBi PHNG ILM STAU q H2O																							39): FSP TBi (2)PHNG zo q ru H2O = FSP GARNET TBi (2)PHNG zo q ru H2O
40): TBi PHNG ILM CHLR ab zo q H2O = GARNET TBi PHNG ILM CHLR ab zo q H2O																							40): FSP GARNET TBi (2)PHNG zo q ru H2O = FSP GARNET TBi (2)PHNG q ru H2O
41): GARNET TBi PHNG ILM CHLR ab zo q H2O = GARNET TBi (2)PHNG ILM CHLR ab zo q H2O																							41): TBi (2)PHNG ab zo q ru H2O = GARNET TBi (2)PHNG ab zo q ru H2O
42): GARNET TBi (2)PHNG ILM CHLR ab zo q H2O = GARNET TBi (2)PHNG ILM CHLR zo q H2O																							42): GARNET TBi (2)PHNG ab zo q ru H2O = FSP GARNET TBi (2)PHNG ab q ru H2O
43): GARNET TBi (2)PHNG ILM CHLR zo q H2O = FSP GARNET TBi (2)PHNG ILM CHLR zo q H2O																							43): FSP GARNET TBi (2)PHNG ab q ru H2O = FSP GARNET TBi (2)PHNG q ru H2O
44): FSP GARNET TBi (2)PHNG ILM CHLR zo q H2O = FSP GARNET TBi PHNG ILM CHLR zo q H2O																							44): FSP GARNET TBi (2)PHNG zo q ru H2O = GARNET TBi (2)PHNG ab zo q ru H2O
45): FSP GARNET TBi (2)PHNG ILM CHLR q H2O = FSP GARNET TBi (2)PHNG ILM q H2O																							45): FSP GARNET TBi (2)PHNG ILM q ru H2O = FSP TBi (2)PHNG ILM q ru H2O
46): FSP GARNET TBi (2)PHNG ILM q H2O = FSP GARNET TBi PHNG ILM q H2O																							46): FSP GARNET TBi PHNG ILM ky q ru H2O = FSP TBi PHNG ILM ky q ru H2O
47): FSP GARNET TBi PHNG ILM q H2O = FSP GARNET TBi PHNG ILM STAU q H2O																							47): FSP TBi (2)PHNG q ru H2O = FSP GARNET TBi (2)PHNG q ru H2O
48): FSP GARNET TBi PHNG ILM STAU q H2O = FSP GARNET TBi PHNG ILM STAU ky q H2O																							48): FSP GARNET TBi (2)PHNG ILM STAU q H2O = FSP GARNET TBi PHNG ILM STAU q H2O
49): FSP GARNET TBi PHNG ILM STAU ky q H2O = FSP GARNET TBi PHNG ILM ky q H2O																							49): FSP GARNET TBi PHNG ILM STAU q H2O = FSP TBi PHNG ILM STAU q H2O
50): FSP GARNET TBi PHNG ILM ky q H2O = FSP GARNET TBi PHNG ILM sill q H2O																							50): FSP GARNET TBi PHNG ILM STAU q H2O = FSP GARNET TBi PHNG ILM STAU ky q H2O
51): GARNET TBi PHNG CHLR ab zo q sph H2O = GARNET TBi (2)PHNG CHLR ab zo q sph H2O																							51): FSP GARNET TBi (2)PHNG q ru H2O = FSP GARNET TBi PHNG ky q ru H2O
52): GARNET TBi (2)PHNG CHLR ab zo q sph H2O = GARNET TBi (2)PHNG CHLR zo q sph H2O																							52): FSP GARNET TBi (2)PHNG ky q ru H2O = FSP GARNET TBi PHNG ILM ky q ru H2O
53): GARNET TBi (2)PHNG CHLR zo q sph H2O = GARNET TBi (2)PHNG ILM CHLR zo q sph H2O																							53): FSP TBi (2)PHNG zo q ru H2O = FSP GARNET TBi (2)PHNG q ru H2O
54): GARNET TBi (2)PHNG ILM CHLR zo q sph H2O = GARNET TBi (2)PHNG ILM CHLR zo q H2O																							54): FSP GARNET TBi (2)PHNG ILM ky q H2O = FSP GARNET TBi (2)PHNG ILM STAU ky q H2O
55): GARNET TBi (2)PHNG ILM CHLR zo q H2O = GARNET TBi (2)PHNG ILM zo q H2O																							55): FSP GARNET TBi (2)PHNG ILM STAU ky q H2O = FSP GARNET TBi (2)PHNG ILM STAU q H2O
56): GARNET TBi (2)PHNG ILM zo q H2O = FSP GARNET TBi (2)PHNG ILM zo q H2O																							56): FSP GARNET TBi (2)PHNG ILM ky q H2O = FSP GARNET TBi (2)PHNG ILM STAU q H2O
57): FSP GARNET TBi (2)PHNG ILM zo q H2O = FSP GARNET TBi (2)PHNG ILM CHLR q H2O																							57): FSP TBi PHNG ILM STAU ky q H2O = FSP GARNET TBi PHNG ILM ky q H2O
58): FSP GARNET TBi (2)PHNG ILM zo q H2O = FSP GARNET TBi (2)PHNG ILM zo q ru H2O																							58): FSP GARNET TBi (2)PHNG ILM q ru H2O = FSP GARNET TBi (2)PHNG ILM STAU q H2O
59): FSP GARNET TBi (2)PHNG ILM zo q ru H2O = FSP GARNET TBi (2)PHNG ILM q ru H2O																							59): FSP GARNET TBi (2)PHNG q ru H2O = FSP GARNET TBi PHNG ky q ru H2O
60): FSP GARNET TBi (2)PHNG ILM q ru H2O = FSP GARNET TBi (2)PHNG q ru H2O																							60): FSP GARNET TBi (2)PHNG ky q ru H2O = FSP GARNET TBi PHNG ky q ru H2O
61): FSP GARNET TBi (2)PHNG q ru H2O = FSP GARNET TBi PHNG q ru H2O																							61): FSP GARNET TBi (2)PHNG q ru H2O = FSP GARNET TBi (2)PHNG ky q ru H2O
62): FSP GARNET TBi PHNG q ru H2O = FSP GARNET TBi PHNG ky q ru H2O																							62): FSP GARNET TBi (2)PHNG ky q ru H2O = FSP GARNET TBi (2)PHNG ILM ky q H2O
63): FSP GARNET TBi PHNG ky q ru H2O = FSP GARNET TBi PHNG sill q ru H2O																							63): FSP GARNET TBi (2)PHNG ILM ky q ru H2O = FSP GARNET TBi (2)PHNG ILM ky q H2O
64): FSP GARNET TBi PHNG sill q ru H2O = FSP GARNET TBi PHNG ILM sill q ru H2O																							64): FSP GARNET TBi (2)PHNG ky q ru H2O = FSP GARNET TBi (2)PHNG ILM ky q ru H2O
65): FSP GARNET TBi PHNG ILM sill q ru H2O = FSP GARNET TBi PHNG ILM sill q H2O																							65): GARNET TBi (2)PHNG ab zo q ru H2O = FSP GARNET TBi (2)PHNG q ru H2O
66): GARNET TBi (2)PHNG CHLR zo q sph H2O = GARNET TBi (2)PHNG CHLR zo q ru H2O
67): GARNET TBi (2)PHNG CHLR zo q sph H2O = GARNET TBi (2)PHNG CHLR zo q ru H2O
68): GARNET TBi (2)PHNG CHLR zo q ru H2O = GARNET TBi (2)PHNG ILM CHLR zo q ru H2O
69): GARNET TBi (2)PHNG ILM CHLR zo q ru H2O = GARNET TBi (2)PHNG ILM CHLR zo q H2O
70): GARNET TBi (2)PHNG ILM zo q ru H2O = GARNET TBi (2)PHNG ILM zo q H2O
71): GARNET TBi (2)PHNG ILM zo q ru H2O = GARNET TBi (2)PHNG ILM ab zo q ru H2O
72): GARNET TBi (2)PHNG ILM ab zo q ru H2O = FSP GARNET TBi (2)PHNG ILM zo q ru H2O
73): FSP GARNET TBi (2)PHNG ILM zo q ru H2O = FSP GARNET TBi (2)PHNG zo q ru H2O
74): FSP GARNET TBi (2)PHNG zo q ru H2O = FSP GARNET TBi (2)PHNG q ru H2O
75): GARNET TBi (2)PHNG CHLR zo q ru H2O = GARNET TBi (2)PHNG zo q ru H2O
76): GARNET TBi (2)PHNG zo q ru H2O = GARNET TBi (2)PHNG ab zo q ru H2O
77): GARNET TBi (2)PHNG ab zo q ru H2O = FSP GARNET TBi (2)PHNG zo q ru H2O
78): GARNET (2)PHNG CHLR ab zo q sph H2O = GARNET TBi (2)PHNG CHLR ab zo q sph H2O
79): GARNET TBi (2)PHNG zo q ru sph H2O = GARNET TBi (2)PHNG zo q ru H2O
80): GARNET TBi (2)PHNG zo q ru sph H2O = GARNET TBi (2)PHNG ab zo q ru H2O
81): GARNET PHNG CHLR ab zo q sph H2O = GARNET TBi PHNG CHLR ab zo q sph H2O
82): GARNET (2)PHNG CHLR ab zo q sph H2O = GARNET PHNG CHLR ab zo q sph H2O
83): FSP GARNET TBi PHNG ILM CHLR ab q sph H2O = FSP GARNET TBi PHNG ILM CHLR q sph H2O
84): FSP GARNET TBi PHNG ILM CHLR ab q sph H2O = FSP GARNET TBi PHNG CHLR ab q sph H2O
85): FSP GARNET TBi (2)PHNG ILM q ru H2O = FSP GARNET TBi (2)PHNG ILM q H2O
86): FSP GARNET TBi (2)PHNG ILM q ru H2O = FSP GARNET TBi (2)PHNG ILM q H2O
87): FSP GARNET TBi PHNG ILM STAU q ru H2O = FSP GARNET TBi PHNG ILM STAU q H2O
88): FSP GARNET TBi PHNG ILM q ru H2O = FSP GARNET TBi PHNG ILM STAU q ru H2O
89): FSP GARNET TBi PHNG q ru H2O = FSP GARNET TBi PHNG ILM q ru H2O
90): FSP GARNET TBi PHNG ILM ky q ru H2O = FSP GARNET TBi PHNG ILM ky q H2O
91): FSP GARNET TBi PHNG ILM ky q ru H2O = FSP GARNET TBi PHNG ky q ru H2O
92): FSP GARNET TBi PHNG CHLR ab q sph H2O = FSP GARNET TBi PHNG ILM CHLR ab q sph H2O
93): FSP GARNET TBi PHNG ILM CHLR ab q sph H2O = FSP GARNET TBi PHNG CHLR ab q sph H2O
94): FSP GARNET TBi PHNG ILM CHLR ab q sph H2O = FSP TBi PHNG ILM CHLR ab q sph H2O
95): TBi PHNG ILM CHLR ab zo q sph H2O = FSP TBi PHNG ILM CHLR zo q sph H2O
96): FSP GARNET TBi (2)PHNG ILM zo q H2O = FSP GARNET TBi (2)PHNG ILM CHLR zo q H2O
97): FSP GARNET TBi (2)PHNG ILM CHLR zo q H2O = FSP GARNET TBi PHNG ILM CHLR zo q H2O
98): FSP GARNET TBi (2)PHNG ILM zo q H2O = FSP GARNET TBi PHNG ILM CHLR zo q H2O
99): FSP GARNET TBi (2)PHNG ILM zo q H2O = FSP GARNET TBi PHNG ILM CHLR zo q H2O
100): FSP GARNET TBi (2)PHNG ILM q H2O = FSP GARNET TBi (2)PHNG ILM STAU q H2O
101): FSP GARNET TBi (2)PHNG ILM zo q H2O = FSP GARNET TBi (2)PHNG ILM q H2O
102): FSP GARNET TBi PHNG ILM q H2O = FSP GARNET TBi PHNG ILM q ru H2O
103): GARNET TBi (2)PHNG ILM CHLR zo q sph H2O = GARNET TBi (2)PHNG ILM CHLR zo q ru H2O
104): GARNET TBi (2)PHNG zo q ru H2O = GARNET TBi (2)PHNG ILM zo q ru H2O
105): GARNET TBi (2)PHNG ILM zo q H2O = GARNET TBi (2)PHNG ILM ab zo q H2O
106): GARNET TBi (2)PHNG ILM ab zo q H2O = FSP GARNET TBi (2)PHNG ILM zo q H2O
107): FSP GARNET TBi (2)PHNG ILM q ru H2O = FSP GARNET TBi (2)PHNG ILM q H2O
108): GARNET TBi (2)PHNG CHLR zo q sph H2O = GARNET TBi (2)PHNG CHLR zo q ru sph H2O
109): GARNET TBi (2)PHNG CHLR zo q ru sph H2O = GARNET TBi (2)PHNG CHLR zo q ru H2O
110): FSP GARNET TBi PHNG ILM CHLR q sph H2O = FSP GARNET TBi PHNG ILM CHLR ab q sph H2O
111): FSP GARNET TBi PHNG ILM CHLR q sph H2O = FSP TBi PHNG ILM CHLR q sph H2O
112): FSP GARNET TBi PHNG ILM CHLR q H2O = FSP GARNET TBi (2)PHNG ILM CHLR STAU q H2O
113): FSP GARNET TBi PHNG CHLR ab q sph H2O = FSP TBi PHNG ILM CHLR ab q sph H2O
114): FSP GARNET TBi PHNG CHLR ab q sph H2O = FSP GARNET TBi PHNG ILM CHLR q sph H2O
115): TBi PHNG ILM CHLR ab zo q H2O = TBi (2)PHNG ILM CHLR ab zo q H2O
116): TBi (2)PHNG ILM CHLR ab zo q H2O = GARNET TBi (2)PHNG ILM CHLR ab zo q H2O
117): GARNET TBi PHNG ILM CHLR ab zo q H2O = FSP GARNET TBi PHNG ILM CHLR zo q H2O
118): FSP GARNET TBi PHNG ILM CHLR zo q H2O = FSP GARNET TBi (2)PHNG ILM zo q H2O
119): FSP GARNET TBi (2)PHNG ILM zo q H2O = FSP GARNET TBi (2)PHNG ILM CHLR zo q H2O
120): FSP GARNET TBi (2)PHNG ILM q ru H2O = FSP GARNET TBi PHNG ILM q ru H2O
121): FSP GARNET TBi PHNG ILM ky q ru H2O = FSP GARNET TBi PHNG ILM sill q ru H2O
122): GARNET TBi (2)PHNG ILM CHLR zo q ru H2O = GARNET TBi (2)PHNG ILM zo q ru H2O
123): GARNET TBi (2)PHNG ILM ab zo q ru H2O = GARNET TBi (2)PHNG ILM ab zo q H2O
124): GARNET TBi (2)PHNG ab zo q ru H2O = GARNET TBi (2)PHNG ILM ab zo q ru H2O
125): FSP GARNET TBi PHNG CHLR ab q sph H2O = FSP TBi PHNG ILM CHLR ab q sph H2O
126): FSP GARNET TBi PHNG ILM CHLR STAU q H2O = FSP GARNET TBi (2)PHNG ILM CHLR STAU q H2O
127): TBi PHNG CHLR ab zo q sph H2O = FSP GARNET TBi PHNG CHLR ab q sph H2O
128): FSP GARNET TBi PHNG CHLR ab q sph H2O = FSP TBi PHNG CHLR ab q sph H2O
129): GARNET TBi PHNG ILM CHLR ab zo q sph H2O = FSP GARNET TBi PHNG ILM CHLR zo q sph H2O
130): GARNET TBi PHNG ILM CHLR ab zo q sph H2O = GARNET TBi (2)PHNG ILM CHLR zo q H2O
131): FSP GARNET TBi PHNG ILM q ru H2O = FSP GARNET TBi PHNG ILM ky q ru H2O
132): FSP GARNET TBi (2)PHNG ILM zo q H2O = FSP GARNET TBi (2)PHNG ILM CHLR zo q H2O
133): FSP GARNET TBi (2)PHNG ILM CHLR zo q H2O = FSP GARNET TBi PHNG ILM CHLR zo q H2O
134): FSP GARNET TBi (2)PHNG ILM zo q H2O = FSP GARNET TBi PHNG ILM CHLR zo q H2O
135): FSP TBi PHNG ILM CHLR q sph H2O = FSP GARNET TBi PHNG ILM CHLR ab q sph H2O
136): FSP GARNET TBi PHNG ILM STAU ky q H2O = FSP GARNET TBi PHNG ILM STAU sill q H2O
137): FSP GARNET TBi PHNG ILM CHLR q sph H2O = FSP TBi PHNG ILM CHLR zo q sph H2O
138): FSP GARNET TBi PHNG ILM CHLR ab q sph H2O = FSP GARNET TBi PHNG CHLR ab q sph H2O
139): FSP GARNET TBi PHNG ILM CHLR q sph H2O = FSP GARNET TBi PHNG ILM CHLR ab q sph H2O
140): FSP GARNET TBi PHNG ILM CHLR ab q sph H2O = FSP GARNET TBi PHNG CHLR ab q sph H2O
141): FSP GARNET TBi PHNG ILM CHLR q sph H2O = FSP GARNET TBi PHNG ILM CHLR ab q sph H2O
142): GARNET TBi PHNG ILM CHLR ab zo q sph H2O = FSP TBi PHNG ILM CHLR zo q sph H2O
143): GARNET TBi (2)PHNG CHLR ab zo q sph H2O = GARNET TBi (2)PHNG ILM CHLR zo q sph H2O
144): GARNET TBi (2)PHNG ILM CHLR ab zo q H2O = GARNET TBi PHNG ILM CHLR ab zo q sph H2O
145): FSP GARNET TBi (2)PHNG ILM CHLR q H2O = FSP GARNET TBi (2)PHNG ILM STAU q H2O
146): FSP GARNET TBi PHNG ILM STAU q ru H2O = FSP GARNET TBi PHNG ILM ky q ru H2O
147): GARNET TBi (2)PHNG CHLR zo q sph H2O = GARNET TBi (2)PHNG ILM CHLR zo q ru H2O
148): GARNET TBi (2)PHNG CHLR zo q sph H2O = GARNET TBi (2)PHNG CHLR zo q ru H2O
149): GARNET TBi (2)PHNG CHLR zo q ru sph H2O = GARNET TBi (2)PHNG CHLR zo q ru H2O
150): GARNET TBi (2)PHNG CHLR zo q sph H2O = GARNET TBi (2)PHNG CHLR zo q ru sph H2O
151): GARNET TBi PHNG CHLR ab zo q sph H2O = FSP GARNET TBi PHNG ILM CHLR q sph H2O
152): GARNET TBi PHNG ILM CHLR ab zo q sph H2O = GARNET TBi (2)PHNG ILM CHLR zo q sph H2O
153): TBi PHNG ILM CHLR ab zo q H2O = FSP GARNET TBi PHNG ILM CHLR zo q H2O
154): FSP GARNET TBi (2)PHNG ILM CHLR zo q H2O = FSP GARNET TBi PHNG ILM CHLR q H2O
155): FSP GARNET TBi (2)PHNG ILM zo q H2O = FSP GARNET TBi (2)PHNG ILM CHLR zo q H2O
156): TBi PHNG ILM CHLR ab zo q H2O = GARNET TBi (2)PHNG ILM CHLR ab zo q H2O
157): GARNET TBi (2)PHNG ILM CHLR zo q H2O = FSP GARNET TBi (2)PHNG ILM zo q H2O
158): FSP GARNET TBi PHNG ILM ky q ru H2O = FSP GARNET TBi PHNG ILM sill q H2O
159): FSP GARNET TBi (2)PHNG ILM zo q H2O = FSP GARNET TBi (2)PHNG ILM q ru H2O
160): FSP GARNET TBi (2)PHNG ILM zo q H2O = FSP GARNET TBi (2)PHNG ILM CHLR zo q H2O
161): FSP GARNET TBi (2)PHNG ILM CHLR zo q H2O = FSP GARNET TBi PHNG ILM CHLR zo q H2O
162): FSP GARNET TBi (2)PHNG ILM zo q H2O = FSP GARNET TBi (2)PHNG ILM CHLR zo q H2O
163): FSP GARNET TBi (2)PHNG ILM CHLR zo q H2O = FSP GARNET TBi PHNG ILM CHLR zo q H2O
164): FSP GARNET TBi (2)PHNG ILM zo q H2O = FSP GARNET TBi PHNG ILM CHLR zo q H2O
165): FSP GARNET TBi PHNG ILM CHLR ab q sph H2O = FSP TBi PHNG ILM CHLR ab q sph H2O
166): FSP TBi PHNG ILM CHLR zo q sph H2O = FSP TBi PHNG ILM CHLR q H2O
167): TBi PHNG ILM CHLR ab zo q sph H2O = FSP TBi PHNG ILM CHLR zo q H2O
168): TBi PHNG ILM CHLR ab zo q sph H2O = TBi (2)PHNG ILM CHLR ab zo q H2O
169): TBi PHNG ILM CHLR ab zo q H2O = GARNET TBi (2)PHNG ILM CHLR ab zo q H2O
170): TBi (2)PHNG ILM CHLR ab zo q H2O = TBi PHNG ILM CHLR ab zo q H2O
171): GARNET TBi (2)PHNG ILM CHLR ab zo q H2O = TBi (2)PHNG ILM CHLR ab zo q H2O
172): GARNET TBi (2)PHNG ILM CHLR ab zo q H2O = FSP GARNET TBi (2)PHNG ILM CHLR zo q H2O
173): FSP GARNET TBi PHNG ILM STAU q ru H2O = FSP GARNET TBi PHNG ILM STAU ky q H2O
174): FSP GARNET TBi PHNG ky q ru H2O = FSP GARNET TBi PHNG ILM sill q ru H2O
175): FSP GARNET TBi (2)PHNG ILM zo q H2O = FSP GARNET TBi (2)PHNG ILM CHLR zo q H2O
176): FSP GARNET TBi (2)PHNG ILM CHLR zo q H2O = FSP GARNET TBi PHNG ILM CHLR zo q H2O
177): FSP GARNET TBi (2)PHNG ILM zo q H2O = FSP GARNET TBi PHNG ILM CHLR zo q H2O
178): FSP GARNET TBi (2)PHNG ILM zo q H2O = FSP GARNET TBi (2)PHNG ILM CHLR zo q H2O
179): FSP GARNET TBi (2)PHNG ILM CHLR zo q H2O = FSP GARNET TBi PHNG ILM CHLR zo q H2O
180): FSP GARNET TBi (2)PHNG ILM zo q H2O = FSP GARNET TBi PHNG ILM CHLR zo q H2O

## Sheet: B-5_4-d
Path B 5_4 diffused composition, core																							Path B 5_4 diffused composition, rim
Core model reactions																							Rim model reactions
1): FSP TBi PHNG ILM CHLR ab q sph H2O = FSP TBi PHNG ILM CHLR q sph H2O																							1): TBi PHNG CHLR ab q ru sph H2O = FSP TBi PHNG CHLR ab q ru H2O
2): FSP TBi PHNG ILM CHLR q sph H2O = FSP TBi PHNG ILM CHLR q ru sph H2O																							2): FSP TBi PHNG CHLR ab q ru H2O = FSP TBi PHNG ILM CHLR ab q ru H2O
3): FSP TBi PHNG ILM CHLR q ru sph H2O = FSP TBi PHNG ILM CHLR q ru H2O																							3): FSP TBi PHNG ILM CHLR ab q ru H2O = FSP TBi PHNG ILM CHLR q ru H2O
4): FSP TBi PHNG ILM CHLR q ru H2O = FSP TBi PHNG ILM CHLR q H2O																							4): FSP TBi PHNG ILM CHLR q ru H2O = FSP TBi PHNG ILM CHLR q H2O
5): FSP TBi PHNG ILM CHLR q H2O = FSP GARNET TBi PHNG ILM CHLR q H2O																							5): FSP TBi PHNG ILM CHLR q H2O = FSP TBi (2)PHNG ILM CHLR q H2O
6): FSP GARNET TBi PHNG ILM CHLR q H2O = FSP GARNET TBi PHNG ILM CHLR STAU q H2O																							6): FSP TBi (2)PHNG ILM CHLR q H2O = FSP TBi (2)PHNG ILM q H2O
7): FSP GARNET TBi PHNG ILM CHLR STAU q H2O = FSP GARNET TBi PHNG ILM STAU q H2O																							7): FSP TBi (2)PHNG ILM q H2O = FSP TBi (2)PHNG ILM STAU q H2O
8): FSP GARNET TBi PHNG ILM STAU q H2O = FSP GARNET TBi PHNG ILM STAU and q H2O																							8): FSP TBi (2)PHNG ILM STAU q H2O = FSP TBi (2)PHNG ILM STAU and q H2O
9): FSP GARNET TBi PHNG ILM STAU and q H2O = FSP GARNET TBi PHNG ILM STAU sill q H2O																							9): FSP TBi (2)PHNG ILM STAU and q H2O = FSP TBi (2)PHNG ILM and q H2O
10): FSP GARNET TBi PHNG ILM STAU sill q H2O = FSP GARNET TBi PHNG ILM sill q H2O																							10): FSP TBi (2)PHNG ILM and q H2O = FSP TBi PHNG ILM and q H2O
11): FSP GARNET TBi PHNG ILM sill q H2O = FSP TBi PHNG ILM sill q H2O																							11): FSP TBi PHNG ILM and q H2O = FSP TBi PHNG ILM sill q H2O
12): FSP TBi PHNG ILM sill q H2O = (2)FSP TBi PHNG ILM sill q H2O																							12): FSP TBi PHNG ILM sill q H2O = FSP TBi PHNG ILM sill q ru H2O
13): (2)FSP TBi PHNG ILM sill q H2O = (2)FSP TBi ILM sill q H2O																							13): FSP TBi PHNG ILM sill q ru H2O = FSP TBi PHNG sill q ru H2O
14): (2)FSP TBi ILM sill q H2O = (2)FSP GARNET TBi ILM sill q H2O																							14): FSP TBi PHNG sill q ru H2O = (2)FSP TBi PHNG sill q ru H2O
15): TBi PHNG CHLR ab zo q sph H2O = FSP TBi PHNG CHLR ab q sph H2O																							15): (2)FSP TBi PHNG sill q ru H2O = (2)FSP TBi sill q ru H2O
16): FSP TBi PHNG CHLR ab q sph H2O = FSP TBi PHNG ILM CHLR ab q sph H2O																							16): (2)FSP TBi sill q ru H2O = (2)FSP TBi ILM sill q ru H2O
17): FSP TBi PHNG ILM CHLR q sph H2O = FSP TBi PHNG ILM CHLR q H2O																							17): (2)FSP TBi ILM sill q ru H2O = (2)FSP TBi ILM sill q H2O
18): FSP GARNET TBi PHNG ILM STAU q H2O = FSP GARNET TBi PHNG ILM STAU sill q H2O																							18): FSP TBi (2)PHNG ILM STAU q H2O = FSP TBi PHNG ILM STAU q H2O
19): FSP TBi PHNG ILM CHLR q sph H2O = FSP TBi PHNG ILM CHLR zo q sph H2O																							19): FSP TBi PHNG ILM STAU q H2O = FSP TBi PHNG ILM STAU sill q H2O
20): FSP TBi PHNG ILM CHLR zo q sph H2O = FSP TBi PHNG ILM CHLR zo q H2O																							20): FSP TBi PHNG ILM STAU sill q H2O = FSP TBi PHNG ILM sill q H2O
21): FSP TBi PHNG ILM CHLR zo q H2O = FSP TBi PHNG ILM CHLR q H2O																							21): FSP TBi PHNG ILM sill q ru H2O = (2)FSP TBi PHNG ILM sill q ru H2O
22): FSP GARNET TBi PHNG ILM sill q H2O = (2)FSP GARNET TBi PHNG ILM sill q H2O																							22): (2)FSP TBi PHNG ILM sill q ru H2O = (2)FSP TBi ILM sill q ru H2O
23): (2)FSP GARNET TBi PHNG ILM sill q H2O = (2)FSP GARNET TBi ILM sill q H2O																							23): FSP TBi PHNG CHLR ab q ru H2O = FSP TBi (2)PHNG CHLR q ru H2O
24): TBi PHNG CHLR ab zo q sph H2O = GARNET TBi PHNG CHLR ab zo q sph H2O																							24): FSP TBi (2)PHNG CHLR q ru H2O = FSP TBi (2)PHNG ILM CHLR q ru H2O
25): GARNET TBi PHNG CHLR ab zo q sph H2O = FSP GARNET TBi PHNG CHLR ab q sph H2O																							25): FSP TBi (2)PHNG ILM CHLR q ru H2O = FSP TBi (2)PHNG ILM CHLR q H2O
26): FSP GARNET TBi PHNG CHLR ab q sph H2O = FSP GARNET TBi PHNG ILM CHLR q sph H2O																							26): FSP TBi PHNG ILM STAU q H2O = FSP TBi PHNG ILM STAU ky q H2O
27): FSP GARNET TBi PHNG CHLR ab q sph H2O = FSP GARNET TBi PHNG ILM CHLR q sph H2O																							27): FSP TBi PHNG ILM STAU ky q H2O = FSP TBi PHNG ILM STAU sill q H2O
28): FSP GARNET TBi PHNG ILM CHLR q sph H2O = FSP GARNET TBi PHNG ILM CHLR zo q sph H2O																							28): TBi (2)PHNG CHLR ab q ru sph H2O = TBi PHNG CHLR ab q ru sph H2O
29): FSP GARNET TBi PHNG ILM CHLR zo q sph H2O = FSP TBi PHNG ILM CHLR zo q sph H2O																							29): TBi (2)PHNG ab q ru sph H2O = TBi (2)PHNG CHLR ab q ru sph H2O
30): GARNET TBi PHNG CHLR ab zo q sph H2O = GARNET TBi PHNG ILM CHLR ab zo q sph H2O																							30): TBi (2)PHNG ab q ru sph H2O = TBi (2)PHNG ab zo q ru H2O
31): GARNET TBi PHNG ILM CHLR ab zo q sph H2O = TBi PHNG ILM CHLR ab zo q sph H2O																							31): TBi (2)PHNG ab zo q ru H2O = FSP TBi (2)PHNG zo q ru H2O
32): TBi PHNG ILM CHLR ab zo q sph H2O = TBi PHNG ILM CHLR ab zo q H2O																							32): FSP TBi (2)PHNG zo q ru H2O = FSP TBi (2)PHNG CHLR q ru H2O
33): TBi PHNG ILM CHLR ab zo q H2O = FSP TBi PHNG ILM CHLR zo q H2O																							33): FSP TBi (2)PHNG ILM q H2O = FSP GARNET TBi (2)PHNG ILM q H2O
34): FSP TBi PHNG ILM CHLR zo q H2O = FSP GARNET TBi PHNG ILM CHLR zo q H2O																							34): FSP GARNET TBi (2)PHNG ILM q H2O = FSP GARNET TBi (2)PHNG ILM STAU q H2O
35): FSP GARNET TBi PHNG ILM CHLR zo q H2O = FSP GARNET TBi PHNG ILM CHLR q H2O																							35): FSP GARNET TBi (2)PHNG ILM STAU q H2O = FSP TBi (2)PHNG ILM STAU q H2O
36): FSP GARNET TBi PHNG ILM CHLR q H2O = FSP GARNET TBi (2)PHNG ILM CHLR q H2O																							36): FSP TBi PHNG ILM STAU ky q H2O = FSP TBi PHNG ILM ky q H2O
37): FSP GARNET TBi (2)PHNG ILM CHLR q H2O = FSP GARNET TBi (2)PHNG ILM CHLR STAU q H2O																							37): FSP TBi PHNG ILM ky q H2O = FSP TBi PHNG ILM sill q H2O
38): FSP GARNET TBi (2)PHNG ILM CHLR STAU q H2O = FSP GARNET TBi (2)PHNG ILM STAU q H2O																							38): FSP TBi (2)PHNG zo q ru H2O = FSP TBi (2)PHNG ILM zo q ru H2O
39): FSP GARNET TBi (2)PHNG ILM STAU q H2O = FSP GARNET TBi PHNG ILM STAU q H2O																							39): FSP TBi (2)PHNG ILM zo q ru H2O = FSP TBi (2)PHNG ILM q ru H2O
40): TBi PHNG ILM CHLR ab zo q H2O = GARNET TBi PHNG ILM CHLR ab zo q H2O																							40): FSP TBi (2)PHNG ILM q ru H2O = FSP TBi (2)PHNG ILM q H2O
41): GARNET TBi PHNG ILM CHLR ab zo q H2O = GARNET TBi (2)PHNG ILM CHLR ab zo q H2O																							41): FSP GARNET TBi (2)PHNG ILM STAU q H2O = FSP GARNET TBi PHNG ILM STAU q H2O
42): GARNET TBi (2)PHNG ILM CHLR ab zo q H2O = GARNET TBi (2)PHNG ILM CHLR zo q H2O																							42): FSP GARNET TBi PHNG ILM STAU q H2O = FSP TBi PHNG ILM STAU q H2O
43): GARNET TBi (2)PHNG ILM CHLR zo q H2O = FSP GARNET TBi (2)PHNG ILM CHLR zo q H2O																							43): FSP GARNET TBi PHNG ILM STAU ky q H2O = FSP TBi PHNG ILM STAU ky q H2O
44): FSP GARNET TBi (2)PHNG ILM CHLR zo q H2O = FSP GARNET TBi PHNG ILM CHLR zo q H2O																							44): FSP GARNET TBi PHNG ILM ky q H2O = FSP GARNET TBi PHNG ILM STAU ky q H2O
45): FSP GARNET TBi (2)PHNG ILM CHLR q H2O = FSP GARNET TBi (2)PHNG ILM q H2O																							45): FSP GARNET TBi PHNG ILM ky q H2O = FSP TBi PHNG ILM ky q H2O
46): FSP GARNET TBi (2)PHNG ILM q H2O = FSP GARNET TBi PHNG ILM q H2O																							46): TBi (2)PHNG ab q sph H2O = TBi (2)PHNG ab q ru sph H2O
47): FSP GARNET TBi PHNG ILM q H2O = FSP GARNET TBi PHNG ILM STAU q H2O																							47): TBi (2)PHNG ab q sph H2O = TBi (2)PHNG ab zo q sph H2O
48): FSP GARNET TBi PHNG ILM STAU q H2O = FSP GARNET TBi PHNG ILM STAU ky q H2O																							48): TBi (2)PHNG ab zo q sph H2O = TBi (2)PHNG ab zo q ru H2O
49): FSP GARNET TBi PHNG ILM STAU ky q H2O = FSP GARNET TBi PHNG ILM ky q H2O																							49): FSP GARNET TBi PHNG ILM STAU q H2O = FSP GARNET TBi PHNG ILM STAU ky q H2O
50): FSP GARNET TBi PHNG ILM ky q H2O = FSP GARNET TBi PHNG ILM sill q H2O																							50): FSP TBi (2)PHNG zo q ru H2O = FSP GARNET TBi (2)PHNG zo q ru H2O
51): GARNET TBi PHNG CHLR ab zo q sph H2O = GARNET TBi (2)PHNG CHLR ab zo q sph H2O																							51): FSP GARNET TBi (2)PHNG zo q ru H2O = FSP GARNET TBi (2)PHNG q ru H2O
52): GARNET TBi (2)PHNG CHLR ab zo q sph H2O = GARNET TBi (2)PHNG CHLR zo q sph H2O																							52): FSP GARNET TBi (2)PHNG q ru H2O = FSP GARNET TBi (2)PHNG ILM q ru H2O
53): GARNET TBi (2)PHNG CHLR zo q sph H2O = GARNET TBi (2)PHNG ILM CHLR zo q sph H2O																							53): FSP GARNET TBi (2)PHNG q ru H2O = FSP GARNET TBi (2)PHNG ILM q ru H2O
54): GARNET TBi (2)PHNG ILM CHLR zo q sph H2O = GARNET TBi (2)PHNG ILM CHLR zo q H2O																							54): FSP GARNET TBi (2)PHNG ILM q ru H2O = FSP GARNET TBi (2)PHNG ILM q H2O
55): GARNET TBi (2)PHNG ILM CHLR zo q H2O = GARNET TBi (2)PHNG ILM zo q H2O																							55): FSP GARNET TBi (2)PHNG q ru H2O = FSP GARNET TBi PHNG q ru H2O
56): GARNET TBi (2)PHNG ILM zo q H2O = FSP GARNET TBi (2)PHNG ILM zo q H2O																							56): FSP GARNET TBi PHNG q ru H2O = FSP GARNET TBi PHNG ky q ru H2O
57): FSP GARNET TBi (2)PHNG ILM zo q H2O = FSP GARNET TBi (2)PHNG ILM CHLR q H2O																							57): FSP GARNET TBi PHNG ky q ru H2O = FSP GARNET TBi PHNG ILM ky q ru H2O
58): FSP GARNET TBi (2)PHNG ILM zo q H2O = FSP GARNET TBi (2)PHNG ILM zo q ru H2O																							58): FSP GARNET TBi PHNG ILM ky q ru H2O = FSP GARNET TBi PHNG ILM ky q H2O
59): FSP GARNET TBi (2)PHNG ILM zo q ru H2O = FSP GARNET TBi (2)PHNG ILM q ru H2O																							59): TBi (2)PHNG CHLR q ru sph H2O = TBi (2)PHNG CHLR ab q ru sph H2O
60): FSP GARNET TBi (2)PHNG ILM q ru H2O = FSP GARNET TBi (2)PHNG q ru H2O																							60): TBi (2)PHNG CHLR q ru sph H2O = TBi (2)PHNG q ru sph H2O
61): FSP GARNET TBi (2)PHNG q ru H2O = FSP GARNET TBi PHNG q ru H2O																							61): TBi (2)PHNG q ru sph H2O = TBi (2)PHNG q sph H2O
62): FSP GARNET TBi PHNG q ru H2O = FSP GARNET TBi PHNG ky q ru H2O																							62): TBi (2)PHNG q sph H2O = TBi (2)PHNG ab q sph H2O
63): FSP GARNET TBi PHNG ky q ru H2O = FSP GARNET TBi PHNG sill q ru H2O																							63): FSP TBi (2)PHNG ILM zo q ru H2O = FSP TBi (2)PHNG ILM CHLR q ru H2O
64): FSP GARNET TBi PHNG sill q ru H2O = FSP GARNET TBi PHNG ILM sill q ru H2O																							64): (2)FSP TBi ILM sill q H2O = (2)FSP TBi PHNG ILM sill q H2O
65): FSP GARNET TBi PHNG ILM sill q ru H2O = FSP GARNET TBi PHNG ILM sill q H2O																							65): (2)FSP TBi PHNG ILM sill q H2O = FSP TBi PHNG ILM sill q H2O
66): GARNET TBi (2)PHNG CHLR zo q sph H2O = GARNET TBi (2)PHNG CHLR zo q ru H2O																							66): FSP GARNET TBi PHNG ILM sill q H2O = FSP TBi PHNG ILM sill q H2O
67): GARNET TBi (2)PHNG CHLR zo q sph H2O = GARNET TBi (2)PHNG CHLR zo q ru H2O																							67): FSP GARNET TBi PHNG ILM ky q H2O = FSP GARNET TBi PHNG ILM sill q H2O
68): GARNET TBi (2)PHNG CHLR zo q ru H2O = GARNET TBi (2)PHNG ILM CHLR zo q ru H2O																							68): TBi PHNG CHLR ab q ru sph H2O = TBi PHNG CHLR ab zo q ru H2O
69): GARNET TBi (2)PHNG ILM CHLR zo q ru H2O = GARNET TBi (2)PHNG ILM CHLR zo q H2O																							69): TBi PHNG CHLR ab zo q ru H2O = FSP TBi PHNG CHLR ab q ru H2O
70): GARNET TBi (2)PHNG ILM zo q ru H2O = GARNET TBi (2)PHNG ILM zo q H2O																							70): FSP TBi PHNG ILM CHLR ab q ru H2O = FSP TBi (2)PHNG ILM CHLR q ru H2O
71): GARNET TBi (2)PHNG ILM zo q ru H2O = GARNET TBi (2)PHNG ILM ab zo q ru H2O																							71): FSP TBi PHNG ILM CHLR q ru H2O = FSP TBi (2)PHNG ILM CHLR q ru H2O
72): GARNET TBi (2)PHNG ILM ab zo q ru H2O = FSP GARNET TBi (2)PHNG ILM zo q ru H2O																							72): FSP TBi (2)PHNG ILM CHLR q ru H2O = FSP TBi (2)PHNG ILM q ru H2O
73): FSP GARNET TBi (2)PHNG ILM zo q ru H2O = FSP GARNET TBi (2)PHNG zo q ru H2O																							73): (2)FSP TBi PHNG ILM sill q ru H2O = (2)FSP TBi PHNG sill q ru H2O
74): FSP GARNET TBi (2)PHNG zo q ru H2O = FSP GARNET TBi (2)PHNG q ru H2O																							74): TBi (2)PHNG q ru sph H2O = TBi (2)PHNG ab q ru sph H2O
75): GARNET TBi (2)PHNG CHLR zo q ru H2O = GARNET TBi (2)PHNG zo q ru H2O																							75): FSP TBi (2)PHNG ILM zo q ru H2O = FSP GARNET TBi (2)PHNG ILM zo q ru H2O
76): GARNET TBi (2)PHNG zo q ru H2O = GARNET TBi (2)PHNG ab zo q ru H2O																							76): FSP GARNET TBi (2)PHNG ILM zo q ru H2O = FSP GARNET TBi (2)PHNG ILM q ru H2O
77): GARNET TBi (2)PHNG ab zo q ru H2O = FSP GARNET TBi (2)PHNG zo q ru H2O																							77): FSP GARNET TBi PHNG ILM STAU q ru H2O = FSP GARNET TBi PHNG ILM STAU q H2O
78): GARNET (2)PHNG CHLR ab zo q sph H2O = GARNET TBi (2)PHNG CHLR ab zo q sph H2O																							78): FSP GARNET TBi PHNG ILM STAU q ru H2O = FSP GARNET TBi (2)PHNG ILM STAU q ru H2O
79): GARNET TBi (2)PHNG zo q ru sph H2O = GARNET TBi (2)PHNG zo q ru H2O																							79): FSP GARNET TBi (2)PHNG ILM STAU q ru H2O = FSP GARNET TBi (2)PHNG ILM q ru H2O
80): GARNET TBi (2)PHNG zo q ru sph H2O = GARNET TBi (2)PHNG ab zo q ru H2O																							80): FSP GARNET TBi (2)PHNG ILM STAU q ru H2O = FSP GARNET TBi (2)PHNG ILM q ru H2O
81): GARNET PHNG CHLR ab zo q sph H2O = GARNET TBi PHNG CHLR ab zo q sph H2O																							81): FSP TBi (2)PHNG ILM STAU q H2O = FSP TBi (2)PHNG ILM STAU sill q H2O
82): GARNET (2)PHNG CHLR ab zo q sph H2O = GARNET PHNG CHLR ab zo q sph H2O																							82): FSP TBi (2)PHNG ILM STAU sill q H2O = FSP TBi PHNG ILM STAU sill q H2O
83): FSP GARNET TBi PHNG ILM CHLR ab q sph H2O = FSP GARNET TBi PHNG ILM CHLR q sph H2O																							83): FSP TBi PHNG ILM sill q H2O = (2)FSP TBi PHNG ILM sill q ru H2O
84): FSP GARNET TBi PHNG ILM CHLR ab q sph H2O = FSP GARNET TBi PHNG CHLR ab q sph H2O																							84): TBi PHNG CHLR ab zo q ru H2O = TBi (2)PHNG CHLR ab zo q ru H2O
85): FSP GARNET TBi (2)PHNG ILM q ru H2O = FSP GARNET TBi (2)PHNG ILM q H2O																							85): TBi (2)PHNG CHLR ab zo q ru H2O = TBi (2)PHNG ab zo q ru H2O
86): FSP GARNET TBi (2)PHNG ILM q ru H2O = FSP GARNET TBi (2)PHNG ILM q H2O																							86): FSP TBi (2)PHNG zo q ru H2O = FSP TBi (2)PHNG CHLR zo q ru H2O
87): FSP GARNET TBi PHNG ILM STAU q ru H2O = FSP GARNET TBi PHNG ILM STAU q H2O																							87): FSP TBi (2)PHNG CHLR zo q ru H2O = FSP TBi (2)PHNG CHLR q ru H2O
88): FSP GARNET TBi PHNG ILM q ru H2O = FSP GARNET TBi PHNG ILM STAU q ru H2O																							88): FSP GARNET TBi (2)PHNG ILM zo q ru H2O = FSP GARNET TBi (2)PHNG zo q ru H2O
89): FSP GARNET TBi PHNG q ru H2O = FSP GARNET TBi PHNG ILM q ru H2O																							89): FSP GARNET TBi (2)PHNG ILM q ru H2O = FSP GARNET TBi PHNG ILM STAU q ru H2O
90): FSP GARNET TBi PHNG ILM ky q ru H2O = FSP GARNET TBi PHNG ILM ky q H2O																							90): FSP TBi (2)PHNG ILM STAU sill q H2O = FSP TBi (2)PHNG ILM sill q H2O
91): FSP GARNET TBi PHNG ILM ky q ru H2O = FSP GARNET TBi PHNG ky q ru H2O																							91): FSP TBi (2)PHNG ILM sill q H2O = FSP TBi PHNG ILM sill q H2O
92): FSP GARNET TBi PHNG CHLR ab q sph H2O = FSP GARNET TBi PHNG ILM CHLR ab q sph H2O																							92): FSP TBi (2)PHNG ILM STAU sill q H2O = FSP TBi (2)PHNG ILM STAU and q H2O
93): FSP GARNET TBi PHNG ILM CHLR ab q sph H2O = FSP GARNET TBi PHNG CHLR ab q sph H2O																							93): FSP TBi (2)PHNG zo q ru H2O = FSP TBi (2)PHNG ILM CHLR q ru H2O
94): FSP GARNET TBi PHNG ILM CHLR ab q sph H2O = FSP TBi PHNG ILM CHLR ab q sph H2O																							94): TBi PHNG CHLR ab zo q ru H2O = TBi (2)PHNG ab zo q ru H2O
95): TBi PHNG ILM CHLR ab zo q sph H2O = FSP TBi PHNG ILM CHLR zo q sph H2O																							95): FSP TBi (2)PHNG ILM zo q ru H2O = FSP TBi (2)PHNG ILM zo q H2O
96): FSP GARNET TBi (2)PHNG ILM zo q H2O = FSP GARNET TBi (2)PHNG ILM CHLR zo q H2O																							96): FSP TBi (2)PHNG ILM zo q H2O = FSP GARNET TBi (2)PHNG ILM zo q H2O
97): FSP GARNET TBi (2)PHNG ILM CHLR zo q H2O = FSP GARNET TBi PHNG ILM CHLR zo q H2O																							97): FSP GARNET TBi (2)PHNG ILM zo q H2O = FSP GARNET TBi (2)PHNG ILM q H2O
98): FSP GARNET TBi (2)PHNG ILM zo q H2O = FSP GARNET TBi PHNG ILM CHLR zo q H2O																							98): FSP GARNET TBi (2)PHNG ILM q ru H2O = FSP GARNET TBi (2)PHNG ILM STAU q H2O
99): FSP GARNET TBi (2)PHNG ILM zo q H2O = FSP GARNET TBi PHNG ILM CHLR zo q H2O																							99): FSP GARNET TBi PHNG q ru H2O = FSP GARNET TBi PHNG STAU q ru H2O
100): FSP GARNET TBi (2)PHNG ILM q H2O = FSP GARNET TBi (2)PHNG ILM STAU q H2O																							100): FSP GARNET TBi PHNG STAU q ru H2O = FSP GARNET TBi PHNG STAU q ru hem H2O
101): FSP GARNET TBi (2)PHNG ILM zo q H2O = FSP GARNET TBi (2)PHNG ILM q H2O																							101): FSP GARNET TBi PHNG STAU q ru H2O = FSP GARNET TBi PHNG STAU ky q ru H2O
102): FSP GARNET TBi PHNG ILM q H2O = FSP GARNET TBi PHNG ILM q ru H2O																							102): FSP GARNET TBi PHNG ky q ru H2O = FSP GARNET TBi PHNG STAU ky q ru H2O
103): GARNET TBi (2)PHNG ILM CHLR zo q sph H2O = GARNET TBi (2)PHNG ILM CHLR zo q ru H2O																							103): FSP GARNET TBi PHNG STAU q ru H2O = FSP GARNET TBi PHNG ILM STAU q ru H2O
104): GARNET TBi (2)PHNG zo q ru H2O = GARNET TBi (2)PHNG ILM zo q ru H2O																							104): FSP TBi (2)PHNG ILM q H2O = FSP TBi (2)PHNG ILM zo q H2O
105): GARNET TBi (2)PHNG ILM zo q H2O = GARNET TBi (2)PHNG ILM ab zo q H2O																							105): FSP GARNET TBi (2)PHNG ILM STAU q ru H2O = FSP GARNET TBi (2)PHNG ILM STAU q H2O
106): GARNET TBi (2)PHNG ILM ab zo q H2O = FSP GARNET TBi (2)PHNG ILM zo q H2O																							106): FSP GARNET TBi PHNG STAU ky q ru H2O = FSP GARNET TBi PHNG ILM ky q ru H2O
107): FSP GARNET TBi (2)PHNG ILM q ru H2O = FSP GARNET TBi (2)PHNG ILM q H2O																							107): FSP GARNET TBi PHNG ILM STAU q ru H2O = FSP GARNET TBi PHNG ILM STAU ky q H2O
108): GARNET TBi (2)PHNG CHLR zo q sph H2O = GARNET TBi (2)PHNG CHLR zo q ru sph H2O																							108): FSP GARNET TBi (2)PHNG q ru H2O = FSP GARNET TBi (2)PHNG STAU q ru H2O
109): GARNET TBi (2)PHNG CHLR zo q ru sph H2O = GARNET TBi (2)PHNG CHLR zo q ru H2O																							109): FSP GARNET TBi (2)PHNG STAU q ru H2O = FSP GARNET TBi PHNG STAU q ru H2O
110): FSP GARNET TBi PHNG ILM CHLR q sph H2O = FSP GARNET TBi PHNG ILM CHLR ab q sph H2O																							110): FSP TBi PHNG ILM sill q ru H2O = (2)FSP TBi PHNG sill q ru H2O
111): FSP GARNET TBi PHNG ILM CHLR q sph H2O = FSP TBi PHNG ILM CHLR q sph H2O																							111): (2)FSP TBi PHNG sill q ru H2O = (2)FSP TBi ILM sill q ru H2O
112): FSP GARNET TBi PHNG ILM CHLR q H2O = FSP GARNET TBi (2)PHNG ILM CHLR STAU q H2O																							112): (2)FSP TBi PHNG ILM sill q H2O = (2)FSP TBi PHNG ILM sill q ru H2O
113): FSP GARNET TBi PHNG CHLR ab q sph H2O = FSP TBi PHNG ILM CHLR ab q sph H2O																							113): FSP TBi (2)PHNG zo q ru H2O = FSP TBi (2)PHNG CHLR q ru H2O
114): FSP GARNET TBi PHNG CHLR ab q sph H2O = FSP GARNET TBi PHNG ILM CHLR q sph H2O																							114): TBi PHNG CHLR ab zo q ru H2O = TBi (2)PHNG CHLR ab zo q ru H2O
115): TBi PHNG ILM CHLR ab zo q H2O = TBi (2)PHNG ILM CHLR ab zo q H2O																							115): TBi (2)PHNG CHLR ab zo q ru H2O = TBi (2)PHNG ab zo q ru H2O
116): TBi (2)PHNG ILM CHLR ab zo q H2O = GARNET TBi (2)PHNG ILM CHLR ab zo q H2O																							116): FSP GARNET TBi (2)PHNG ILM q ru H2O = FSP GARNET TBi PHNG ILM STAU q ru H2O
117): GARNET TBi PHNG ILM CHLR ab zo q H2O = FSP GARNET TBi PHNG ILM CHLR zo q H2O																							117): FSP GARNET TBi PHNG ILM STAU q ru H2O = FSP GARNET TBi (2)PHNG ILM STAU q ru H2O
118): FSP GARNET TBi PHNG ILM CHLR zo q H2O = FSP GARNET TBi (2)PHNG ILM zo q H2O																							118): FSP GARNET TBi PHNG ILM STAU q ru H2O = FSP GARNET TBi PHNG ILM ky q ru H2O
119): FSP GARNET TBi (2)PHNG ILM zo q H2O = FSP GARNET TBi (2)PHNG ILM CHLR zo q H2O																							119): FSP TBi (2)PHNG CHLR q ru H2O = FSP TBi PHNG ILM CHLR ab q ru H2O
120): FSP GARNET TBi (2)PHNG ILM q ru H2O = FSP GARNET TBi PHNG ILM q ru H2O																							120): FSP TBi PHNG ILM CHLR q ru H2O = FSP TBi (2)PHNG ILM CHLR q H2O
121): FSP GARNET TBi PHNG ILM ky q ru H2O = FSP GARNET TBi PHNG ILM sill q ru H2O																							121): FSP TBi (2)PHNG ILM STAU sill q H2O = FSP TBi PHNG ILM sill q H2O
122): GARNET TBi (2)PHNG ILM CHLR zo q ru H2O = GARNET TBi (2)PHNG ILM zo q ru H2O																							122): FSP TBi (2)PHNG zo q ru H2O = FSP TBi (2)PHNG CHLR zo q ru H2O
123): GARNET TBi (2)PHNG ILM ab zo q ru H2O = GARNET TBi (2)PHNG ILM ab zo q H2O																							123): FSP TBi (2)PHNG CHLR zo q ru H2O = FSP TBi (2)PHNG CHLR q ru H2O
124): GARNET TBi (2)PHNG ab zo q ru H2O = GARNET TBi (2)PHNG ILM ab zo q ru H2O																							124): FSP TBi (2)PHNG zo q ru H2O = FSP TBi (2)PHNG CHLR q ru H2O
125): FSP GARNET TBi PHNG CHLR ab q sph H2O = FSP TBi PHNG ILM CHLR ab q sph H2O																							125): FSP GARNET TBi (2)PHNG q ru H2O = FSP GARNET TBi PHNG STAU q ru H2O
126): FSP GARNET TBi PHNG ILM CHLR STAU q H2O = FSP GARNET TBi (2)PHNG ILM CHLR STAU q H2O																							126): TBi PHNG CHLR ab zo q ru H2O = TBi (2)PHNG ab zo q ru H2O
127): TBi PHNG CHLR ab zo q sph H2O = FSP GARNET TBi PHNG CHLR ab q sph H2O																							127): TBi (2)PHNG CHLR ab zo q ru H2O = TBi PHNG CHLR ab zo q ru H2O
128): FSP GARNET TBi PHNG CHLR ab q sph H2O = FSP TBi PHNG CHLR ab q sph H2O																							128): TBi (2)PHNG ab zo q ru H2O = TBi (2)PHNG CHLR ab zo q ru H2O
129): GARNET TBi PHNG ILM CHLR ab zo q sph H2O = FSP GARNET TBi PHNG ILM CHLR zo q sph H2O
130): GARNET TBi PHNG ILM CHLR ab zo q sph H2O = GARNET TBi (2)PHNG ILM CHLR zo q H2O
131): FSP GARNET TBi PHNG ILM q ru H2O = FSP GARNET TBi PHNG ILM ky q ru H2O
132): FSP GARNET TBi (2)PHNG ILM zo q H2O = FSP GARNET TBi (2)PHNG ILM CHLR zo q H2O
133): FSP GARNET TBi (2)PHNG ILM CHLR zo q H2O = FSP GARNET TBi PHNG ILM CHLR zo q H2O
134): FSP GARNET TBi (2)PHNG ILM zo q H2O = FSP GARNET TBi PHNG ILM CHLR zo q H2O
135): FSP TBi PHNG ILM CHLR q sph H2O = FSP GARNET TBi PHNG ILM CHLR ab q sph H2O
136): FSP GARNET TBi PHNG ILM STAU ky q H2O = FSP GARNET TBi PHNG ILM STAU sill q H2O
137): FSP GARNET TBi PHNG ILM CHLR q sph H2O = FSP TBi PHNG ILM CHLR zo q sph H2O
138): FSP GARNET TBi PHNG ILM CHLR ab q sph H2O = FSP GARNET TBi PHNG CHLR ab q sph H2O
139): FSP GARNET TBi PHNG ILM CHLR q sph H2O = FSP GARNET TBi PHNG ILM CHLR ab q sph H2O
140): FSP GARNET TBi PHNG ILM CHLR ab q sph H2O = FSP GARNET TBi PHNG CHLR ab q sph H2O
141): FSP GARNET TBi PHNG ILM CHLR q sph H2O = FSP GARNET TBi PHNG ILM CHLR ab q sph H2O
142): GARNET TBi PHNG ILM CHLR ab zo q sph H2O = FSP TBi PHNG ILM CHLR zo q sph H2O
143): GARNET TBi (2)PHNG CHLR ab zo q sph H2O = GARNET TBi (2)PHNG ILM CHLR zo q sph H2O
144): GARNET TBi (2)PHNG ILM CHLR ab zo q H2O = GARNET TBi PHNG ILM CHLR ab zo q sph H2O
145): FSP GARNET TBi (2)PHNG ILM CHLR q H2O = FSP GARNET TBi (2)PHNG ILM STAU q H2O
146): FSP GARNET TBi PHNG ILM STAU q ru H2O = FSP GARNET TBi PHNG ILM ky q ru H2O
147): GARNET TBi (2)PHNG CHLR zo q sph H2O = GARNET TBi (2)PHNG ILM CHLR zo q ru H2O
148): GARNET TBi (2)PHNG CHLR zo q sph H2O = GARNET TBi (2)PHNG CHLR zo q ru H2O
149): GARNET TBi (2)PHNG CHLR zo q ru sph H2O = GARNET TBi (2)PHNG CHLR zo q ru H2O
150): GARNET TBi (2)PHNG CHLR zo q sph H2O = GARNET TBi (2)PHNG CHLR zo q ru sph H2O
151): GARNET TBi PHNG CHLR ab zo q sph H2O = FSP GARNET TBi PHNG ILM CHLR q sph H2O
152): GARNET TBi PHNG ILM CHLR ab zo q sph H2O = GARNET TBi (2)PHNG ILM CHLR zo q sph H2O
153): TBi PHNG ILM CHLR ab zo q H2O = FSP GARNET TBi PHNG ILM CHLR zo q H2O
154): FSP GARNET TBi (2)PHNG ILM CHLR zo q H2O = FSP GARNET TBi PHNG ILM CHLR q H2O
155): FSP GARNET TBi (2)PHNG ILM zo q H2O = FSP GARNET TBi (2)PHNG ILM CHLR zo q H2O
156): TBi PHNG ILM CHLR ab zo q H2O = GARNET TBi (2)PHNG ILM CHLR ab zo q H2O
157): GARNET TBi (2)PHNG ILM CHLR zo q H2O = FSP GARNET TBi (2)PHNG ILM zo q H2O
158): FSP GARNET TBi PHNG ILM ky q ru H2O = FSP GARNET TBi PHNG ILM sill q H2O
159): FSP GARNET TBi (2)PHNG ILM zo q H2O = FSP GARNET TBi (2)PHNG ILM q ru H2O
160): FSP GARNET TBi (2)PHNG ILM zo q H2O = FSP GARNET TBi (2)PHNG ILM CHLR zo q H2O
161): FSP GARNET TBi (2)PHNG ILM CHLR zo q H2O = FSP GARNET TBi PHNG ILM CHLR zo q H2O
162): FSP GARNET TBi (2)PHNG ILM zo q H2O = FSP GARNET TBi (2)PHNG ILM CHLR zo q H2O
163): FSP GARNET TBi (2)PHNG ILM CHLR zo q H2O = FSP GARNET TBi PHNG ILM CHLR zo q H2O
164): FSP GARNET TBi (2)PHNG ILM zo q H2O = FSP GARNET TBi PHNG ILM CHLR zo q H2O
165): FSP GARNET TBi PHNG ILM CHLR ab q sph H2O = FSP TBi PHNG ILM CHLR ab q sph H2O
166): FSP TBi PHNG ILM CHLR zo q sph H2O = FSP TBi PHNG ILM CHLR q H2O
167): TBi PHNG ILM CHLR ab zo q sph H2O = FSP TBi PHNG ILM CHLR zo q H2O
168): TBi PHNG ILM CHLR ab zo q sph H2O = TBi (2)PHNG ILM CHLR ab zo q H2O
169): TBi PHNG ILM CHLR ab zo q H2O = GARNET TBi (2)PHNG ILM CHLR ab zo q H2O
170): TBi (2)PHNG ILM CHLR ab zo q H2O = TBi PHNG ILM CHLR ab zo q H2O
171): GARNET TBi (2)PHNG ILM CHLR ab zo q H2O = TBi (2)PHNG ILM CHLR ab zo q H2O
172): GARNET TBi (2)PHNG ILM CHLR ab zo q H2O = FSP GARNET TBi (2)PHNG ILM CHLR zo q H2O
173): FSP GARNET TBi PHNG ILM STAU q ru H2O = FSP GARNET TBi PHNG ILM STAU ky q H2O
174): FSP GARNET TBi PHNG ky q ru H2O = FSP GARNET TBi PHNG ILM sill q ru H2O
175): FSP GARNET TBi (2)PHNG ILM zo q H2O = FSP GARNET TBi (2)PHNG ILM CHLR zo q H2O
176): FSP GARNET TBi (2)PHNG ILM CHLR zo q H2O = FSP GARNET TBi PHNG ILM CHLR zo q H2O
177): FSP GARNET TBi (2)PHNG ILM zo q H2O = FSP GARNET TBi PHNG ILM CHLR zo q H2O
178): FSP GARNET TBi (2)PHNG ILM zo q H2O = FSP GARNET TBi (2)PHNG ILM CHLR zo q H2O
179): FSP GARNET TBi (2)PHNG ILM CHLR zo q H2O = FSP GARNET TBi PHNG ILM CHLR zo q H2O
180): FSP GARNET TBi (2)PHNG ILM zo q H2O = FSP GARNET TBi PHNG ILM CHLR zo q H2O

## Sheet: B-5_6-p
Path B 5_6 primary composition, core																							Path B 5_6 primary composition, rim
Core model reactions																							Rim model reactions
1): FSP TBi PHNG CHLR ab q sph H2O = FSP TBi PHNG ILM CHLR ab q sph H2O																							1): TBi PHNG CHLR ab q ru sph H2O = FSP TBi PHNG CHLR ab q ru H2O
2): FSP TBi PHNG ILM CHLR ab q sph H2O = FSP TBi PHNG ILM CHLR q ru sph H2O																							2): FSP TBi PHNG CHLR ab q ru H2O = FSP TBi PHNG ILM CHLR ab q ru H2O
3): FSP TBi PHNG ILM CHLR q ru sph H2O = FSP TBi PHNG ILM CHLR q ru H2O																							3): FSP TBi PHNG ILM CHLR ab q ru H2O = FSP TBi PHNG ILM CHLR q ru H2O
4): FSP TBi PHNG ILM CHLR q ru H2O = FSP TBi PHNG ILM CHLR q H2O																							4): FSP TBi PHNG ILM CHLR q ru H2O = FSP TBi PHNG ILM CHLR q H2O
5): FSP TBi PHNG ILM CHLR q H2O = FSP GARNET TBi PHNG ILM CHLR q H2O																							5): FSP TBi PHNG ILM CHLR q H2O = FSP TBi (2)PHNG ILM CHLR q H2O
6): FSP GARNET TBi PHNG ILM CHLR q H2O = FSP GARNET TBi PHNG ILM CHLR STAU q H2O																							6): FSP TBi (2)PHNG ILM CHLR q H2O = FSP TBi (2)PHNG ILM q H2O
7): FSP GARNET TBi PHNG ILM CHLR STAU q H2O = FSP TBi PHNG ILM CHLR STAU q H2O																							7): FSP TBi (2)PHNG ILM q H2O = FSP TBi (2)PHNG ILM STAU q H2O
8): FSP TBi PHNG ILM CHLR STAU q H2O = FSP TBi PHNG ILM STAU q H2O																							8): FSP TBi (2)PHNG ILM STAU q H2O = FSP TBi (2)PHNG ILM STAU and q H2O
9): FSP TBi PHNG ILM STAU q H2O = FSP TBi PHNG ILM STAU and q H2O																							9): FSP TBi (2)PHNG ILM STAU and q H2O = FSP TBi (2)PHNG ILM and q H2O
10): FSP TBi PHNG ILM STAU and q H2O = FSP TBi PHNG ILM STAU sill q H2O																							10): FSP TBi (2)PHNG ILM and q H2O = FSP TBi PHNG ILM and q H2O
11): FSP TBi PHNG ILM STAU sill q H2O = FSP GARNET TBi PHNG ILM STAU sill q H2O																							11): FSP TBi PHNG ILM and q H2O = FSP TBi PHNG ILM sill q H2O
12): FSP GARNET TBi PHNG ILM STAU sill q H2O = FSP GARNET TBi PHNG ILM sill q H2O																							12): FSP TBi PHNG ILM sill q H2O = FSP TBi PHNG ILM sill q ru H2O
13): FSP GARNET TBi PHNG ILM sill q H2O = FSP TBi PHNG ILM sill q H2O																							13): FSP TBi PHNG ILM sill q ru H2O = FSP TBi PHNG sill q ru H2O
14): FSP TBi PHNG ILM sill q H2O = (2)FSP TBi PHNG ILM sill q H2O																							14): FSP TBi PHNG sill q ru H2O = (2)FSP TBi PHNG sill q ru H2O
15): (2)FSP TBi PHNG ILM sill q H2O = (2)FSP TBi ILM sill q H2O																							15): (2)FSP TBi PHNG sill q ru H2O = (2)FSP TBi sill q ru H2O
16): (2)FSP TBi ILM sill q H2O = (2)FSP GARNET TBi ILM sill q H2O																							16): (2)FSP TBi sill q ru H2O = (2)FSP TBi ILM sill q ru H2O
17): TBi PHNG CHLR ab zo q sph H2O = FSP TBi PHNG CHLR ab q sph H2O																							17): (2)FSP TBi ILM sill q ru H2O = (2)FSP TBi ILM sill q H2O
18): FSP GARNET TBi PHNG ILM CHLR STAU q H2O = FSP GARNET TBi PHNG ILM STAU q H2O																							18): FSP TBi (2)PHNG ILM STAU q H2O = FSP TBi PHNG ILM STAU q H2O
19): FSP GARNET TBi PHNG ILM STAU q H2O = FSP GARNET TBi PHNG ILM STAU sill q H2O																							19): FSP TBi PHNG ILM STAU q H2O = FSP TBi PHNG ILM STAU sill q H2O
20): FSP TBi PHNG ILM CHLR ab q sph H2O = FSP TBi PHNG ILM CHLR q sph H2O																							20): FSP TBi PHNG ILM STAU sill q H2O = FSP TBi PHNG ILM sill q H2O
21): FSP TBi PHNG ILM CHLR q sph H2O = FSP TBi PHNG ILM CHLR q ru sph H2O																							21): FSP TBi PHNG ILM CHLR q ru H2O = FSP TBi (2)PHNG ILM CHLR q ru H2O
22): FSP TBi PHNG ILM CHLR q sph H2O = FSP TBi PHNG ILM CHLR zo q sph H2O																							22): FSP TBi (2)PHNG ILM CHLR q ru H2O = FSP TBi (2)PHNG ILM CHLR q H2O
23): FSP TBi PHNG ILM CHLR zo q sph H2O = FSP TBi PHNG ILM CHLR zo q H2O																							23): FSP TBi PHNG ILM sill q ru H2O = (2)FSP TBi PHNG sill q ru H2O
24): FSP TBi PHNG ILM CHLR zo q H2O = FSP TBi PHNG ILM CHLR q H2O																							24): FSP TBi PHNG CHLR ab q ru H2O = FSP TBi (2)PHNG CHLR q ru H2O
25): TBi PHNG CHLR ab zo q sph H2O = TBi PHNG ILM CHLR ab zo q sph H2O																							25): FSP TBi (2)PHNG CHLR q ru H2O = FSP TBi (2)PHNG ILM CHLR q ru H2O
26): TBi PHNG ILM CHLR ab zo q sph H2O = FSP TBi PHNG ILM CHLR zo q sph H2O																							26): FSP TBi PHNG ILM sill q ru H2O = (2)FSP TBi PHNG ILM sill q ru H2O
27): FSP GARNET TBi (2)PHNG ILM CHLR q H2O = FSP GARNET TBi PHNG ILM CHLR q H2O																							27): (2)FSP TBi PHNG ILM sill q ru H2O = (2)FSP TBi ILM sill q ru H2O
28): FSP GARNET TBi (2)PHNG ILM CHLR q H2O = FSP GARNET TBi (2)PHNG ILM CHLR STAU q H2O																							28): FSP TBi PHNG ILM STAU q H2O = FSP TBi PHNG ILM STAU ky q H2O
29): FSP GARNET TBi (2)PHNG ILM CHLR STAU q H2O = FSP GARNET TBi (2)PHNG ILM STAU q H2O																							29): FSP TBi PHNG ILM STAU ky q H2O = FSP TBi PHNG ILM STAU sill q H2O
30): FSP GARNET TBi (2)PHNG ILM STAU q H2O = FSP GARNET TBi PHNG ILM STAU q H2O																							30): TBi PHNG CHLR ab q ru sph H2O = TBi (2)PHNG CHLR ab q ru sph H2O
31): FSP GARNET TBi PHNG ILM sill q H2O = (2)FSP GARNET TBi PHNG ILM sill q H2O																							31): TBi (2)PHNG ab q ru sph H2O = TBi (2)PHNG CHLR ab q ru sph H2O
32): (2)FSP GARNET TBi PHNG ILM sill q H2O = (2)FSP GARNET TBi ILM sill q H2O																							32): TBi (2)PHNG ab q ru sph H2O = TBi (2)PHNG ab zo q ru H2O
33): GARNET TBi PHNG CHLR ab zo q sph H2O = TBi PHNG CHLR ab zo q sph H2O																							33): TBi (2)PHNG ab zo q ru H2O = FSP TBi (2)PHNG zo q ru H2O
34): GARNET TBi PHNG CHLR ab zo q sph H2O = GARNET TBi PHNG ILM CHLR ab zo q sph H2O																							34): FSP TBi (2)PHNG zo q ru H2O = FSP TBi (2)PHNG CHLR q ru H2O
35): GARNET TBi PHNG ILM CHLR ab zo q sph H2O = TBi PHNG ILM CHLR ab zo q sph H2O																							35): FSP TBi (2)PHNG ILM CHLR q ru H2O = FSP TBi (2)PHNG ILM q ru H2O
36): TBi PHNG ILM CHLR ab zo q sph H2O = TBi (2)PHNG ILM CHLR ab zo q H2O																							36): FSP TBi (2)PHNG ILM q ru H2O = FSP TBi (2)PHNG ILM q H2O
37): TBi (2)PHNG ILM CHLR ab zo q H2O = TBi (2)PHNG ILM CHLR zo q H2O																							37): FSP TBi PHNG ILM STAU ky q H2O = FSP TBi PHNG ILM ky q H2O
38): TBi (2)PHNG ILM CHLR zo q H2O = FSP TBi (2)PHNG ILM CHLR zo q H2O																							38): FSP TBi PHNG ILM ky q H2O = FSP TBi PHNG ILM sill q H2O
39): FSP TBi (2)PHNG ILM CHLR zo q H2O = FSP TBi PHNG ILM CHLR zo q H2O																							39): FSP TBi (2)PHNG zo q ru H2O = FSP TBi (2)PHNG ILM zo q ru H2O
40): FSP TBi PHNG ILM CHLR zo q H2O = FSP GARNET TBi PHNG ILM CHLR zo q H2O																							40): FSP TBi (2)PHNG ILM zo q ru H2O = FSP TBi (2)PHNG ILM q ru H2O
41): FSP GARNET TBi PHNG ILM CHLR zo q H2O = FSP GARNET TBi PHNG ILM CHLR q H2O																							41): FSP TBi (2)PHNG ILM q H2O = FSP GARNET TBi (2)PHNG ILM q H2O
42): FSP GARNET TBi (2)PHNG ILM CHLR q H2O = FSP GARNET TBi (2)PHNG ILM q H2O																							42): FSP GARNET TBi (2)PHNG ILM q H2O = FSP GARNET TBi (2)PHNG ILM STAU q H2O
43): FSP GARNET TBi (2)PHNG ILM q H2O = FSP GARNET TBi (2)PHNG ILM STAU q H2O																							43): FSP GARNET TBi (2)PHNG ILM STAU q H2O = FSP TBi (2)PHNG ILM STAU q H2O
44): FSP GARNET TBi PHNG ILM STAU q H2O = FSP GARNET TBi PHNG ILM STAU ky q H2O																							44): FSP GARNET TBi (2)PHNG ILM STAU q H2O = FSP GARNET TBi PHNG ILM STAU q H2O
45): FSP GARNET TBi PHNG ILM STAU ky q H2O = FSP GARNET TBi PHNG ILM ky q H2O																							45): FSP GARNET TBi PHNG ILM STAU q H2O = FSP GARNET TBi PHNG ILM STAU ky q H2O
46): FSP GARNET TBi PHNG ILM ky q H2O = FSP GARNET TBi PHNG ILM sill q H2O																							46): FSP GARNET TBi PHNG ILM STAU ky q H2O = FSP GARNET TBi PHNG ILM ky q H2O
47): GARNET TBi PHNG CHLR ab zo q sph H2O = GARNET TBi (2)PHNG CHLR ab zo q sph H2O																							47): FSP GARNET TBi PHNG ILM ky q H2O = FSP TBi PHNG ILM ky q H2O
48): GARNET TBi (2)PHNG CHLR ab zo q sph H2O = GARNET TBi (2)PHNG CHLR zo q sph H2O																							48): FSP TBi (2)PHNG zo q ru H2O = FSP GARNET TBi (2)PHNG zo q ru H2O
49): GARNET TBi (2)PHNG CHLR zo q sph H2O = GARNET TBi (2)PHNG ILM CHLR zo q sph H2O																							49): FSP GARNET TBi (2)PHNG zo q ru H2O = FSP GARNET TBi (2)PHNG q ru H2O
50): GARNET TBi (2)PHNG ILM CHLR zo q sph H2O = TBi (2)PHNG ILM CHLR zo q sph H2O																							50): FSP GARNET TBi (2)PHNG q ru H2O = FSP GARNET TBi (2)PHNG ILM q ru H2O
51): TBi (2)PHNG ILM CHLR zo q sph H2O = TBi (2)PHNG ILM CHLR zo q H2O																							51): FSP GARNET TBi (2)PHNG ILM q ru H2O = FSP GARNET TBi (2)PHNG ILM q H2O
52): TBi (2)PHNG ILM CHLR zo q H2O = GARNET TBi (2)PHNG ILM CHLR zo q H2O																							52): FSP GARNET TBi (2)PHNG q ru H2O = FSP GARNET TBi PHNG q ru H2O
53): GARNET TBi (2)PHNG ILM CHLR zo q H2O = GARNET TBi (2)PHNG ILM zo q H2O																							53): FSP GARNET TBi PHNG q ru H2O = FSP GARNET TBi PHNG ky q ru H2O
54): GARNET TBi (2)PHNG ILM zo q H2O = FSP GARNET TBi (2)PHNG ILM zo q H2O																							54): FSP GARNET TBi PHNG ky q ru H2O = FSP GARNET TBi PHNG ILM ky q ru H2O
55): FSP GARNET TBi (2)PHNG ILM zo q H2O = FSP GARNET TBi (2)PHNG ILM CHLR q H2O																							55): FSP GARNET TBi PHNG ILM ky q ru H2O = FSP GARNET TBi PHNG ILM ky q H2O
56): FSP GARNET TBi (2)PHNG ILM q H2O = FSP GARNET TBi PHNG ILM q H2O																							56): TBi (2)PHNG CHLR q ru sph H2O = TBi (2)PHNG CHLR ab q ru sph H2O
57): FSP GARNET TBi PHNG ILM q H2O = FSP GARNET TBi PHNG ILM STAU q H2O																							57): TBi (2)PHNG CHLR q ru sph H2O = TBi (2)PHNG q ru sph H2O
58): GARNET TBi (2)PHNG ILM CHLR zo q sph H2O = GARNET TBi (2)PHNG ILM CHLR zo q H2O																							58): TBi (2)PHNG q ru sph H2O = TBi (2)PHNG ab q ru sph H2O
59): FSP GARNET TBi (2)PHNG ILM zo q H2O = FSP GARNET TBi (2)PHNG ILM zo q ru H2O																							59): FSP TBi (2)PHNG ILM CHLR q ru H2O = FSP TBi (2)PHNG ILM zo q ru H2O
60): FSP GARNET TBi (2)PHNG ILM zo q ru H2O = FSP GARNET TBi (2)PHNG ILM q ru H2O																							60): FSP TBi PHNG ILM STAU ky q H2O = FSP GARNET TBi PHNG ILM STAU ky q H2O
61): FSP GARNET TBi (2)PHNG ILM q ru H2O = FSP GARNET TBi (2)PHNG ILM q H2O																							61): (2)FSP TBi PHNG sill q ru H2O = (2)FSP TBi PHNG ILM sill q ru H2O
62): FSP GARNET TBi (2)PHNG ILM q ru H2O = FSP GARNET TBi PHNG ILM q ru H2O																							62): FSP TBi PHNG ILM sill q H2O = FSP GARNET TBi PHNG ILM sill q H2O
63): FSP GARNET TBi PHNG q ru H2O = FSP GARNET TBi PHNG ILM q ru H2O																							63): FSP GARNET TBi PHNG ILM sill q H2O = FSP GARNET TBi PHNG ILM ky q H2O
64): FSP GARNET TBi PHNG q ru H2O = FSP GARNET TBi PHNG ky q ru H2O																							64): TBi PHNG CHLR ab q ru sph H2O = TBi PHNG CHLR ab zo q ru H2O
65): FSP GARNET TBi PHNG ky q ru H2O = FSP GARNET TBi PHNG ILM ky q ru H2O																							65): TBi PHNG CHLR ab zo q ru H2O = FSP TBi PHNG CHLR ab q ru H2O
66): FSP GARNET TBi PHNG ILM ky q ru H2O = FSP GARNET TBi PHNG ILM ky q H2O																							66): TBi (2)PHNG CHLR ab zo q ru H2O = TBi PHNG CHLR ab zo q ru H2O
67): GARNET TBi (2)PHNG ILM CHLR zo q sph H2O = GARNET TBi (2)PHNG ILM CHLR zo q ru H2O																							67): TBi (2)PHNG CHLR ab q ru sph H2O = TBi (2)PHNG CHLR ab zo q ru H2O
68): GARNET TBi (2)PHNG ILM CHLR zo q ru H2O = GARNET TBi (2)PHNG ILM CHLR zo q H2O																							68): FSP TBi PHNG ILM CHLR ab q ru H2O = FSP TBi (2)PHNG ILM CHLR q ru H2O
69): GARNET TBi (2)PHNG ILM zo q H2O = GARNET TBi (2)PHNG ILM ab zo q H2O																							69): FSP GARNET TBi PHNG ILM STAU q H2O = FSP TBi PHNG ILM STAU q H2O
70): GARNET TBi (2)PHNG ILM ab zo q H2O = FSP GARNET TBi (2)PHNG ILM zo q H2O																							70): FSP TBi (2)PHNG ILM zo q ru H2O = FSP GARNET TBi (2)PHNG ILM zo q ru H2O
71): FSP GARNET TBi (2)PHNG ILM zo q ru H2O = FSP GARNET TBi (2)PHNG zo q ru H2O																							71): FSP GARNET TBi (2)PHNG ILM zo q ru H2O = FSP GARNET TBi (2)PHNG ILM q ru H2O
72): FSP GARNET TBi (2)PHNG zo q ru H2O = FSP GARNET TBi (2)PHNG q ru H2O																							72): FSP GARNET TBi PHNG q ru H2O = FSP GARNET TBi PHNG STAU q ru H2O
73): FSP GARNET TBi (2)PHNG q ru H2O = FSP GARNET TBi PHNG q ru H2O																							73): FSP GARNET TBi PHNG STAU q ru H2O = FSP GARNET TBi PHNG STAU ky q ru H2O
74): GARNET TBi (2)PHNG CHLR zo q sph H2O = GARNET TBi (2)PHNG CHLR zo q ru sph H2O																							74): FSP GARNET TBi PHNG STAU ky q ru H2O = FSP GARNET TBi PHNG ky q ru H2O
75): GARNET TBi (2)PHNG CHLR zo q ru sph H2O = GARNET TBi (2)PHNG CHLR zo q ru H2O																							75): FSP GARNET TBi PHNG ILM STAU q H2O = FSP GARNET TBi PHNG ILM STAU q ru H2O
76): GARNET TBi (2)PHNG CHLR zo q ru H2O = GARNET TBi (2)PHNG zo q ru H2O																							76): FSP GARNET TBi PHNG ILM STAU q ru H2O = FSP GARNET TBi (2)PHNG ILM q ru H2O
77): GARNET TBi (2)PHNG zo q ru H2O = GARNET TBi (2)PHNG ab zo q ru H2O																							77): FSP TBi (2)PHNG CHLR ab q ru H2O = FSP TBi PHNG CHLR ab q ru H2O
78): GARNET TBi (2)PHNG ab zo q ru H2O = FSP GARNET TBi (2)PHNG zo q ru H2O																							78): FSP TBi (2)PHNG CHLR q ru H2O = FSP TBi (2)PHNG CHLR ab q ru H2O
79): GARNET (2)PHNG CHLR ab zo q sph H2O = GARNET TBi (2)PHNG CHLR ab zo q sph H2O																							79): FSP TBi (2)PHNG ILM STAU q H2O = FSP TBi (2)PHNG ILM STAU sill q H2O
80): GARNET TBi (2)PHNG CHLR zo q sph H2O = GARNET TBi (2)PHNG CHLR zo q ru H2O																							80): FSP TBi (2)PHNG ILM STAU sill q H2O = FSP TBi (2)PHNG ILM sill q H2O
81): GARNET PHNG CHLR ab zo q sph H2O = GARNET TBi PHNG CHLR ab zo q sph H2O																							81): FSP TBi (2)PHNG ILM sill q H2O = FSP TBi PHNG ILM sill q H2O
82): GARNET (2)PHNG CHLR ab zo q sph H2O = GARNET PHNG CHLR ab zo q sph H2O																							82): TBi (2)PHNG CHLR ab zo q ru H2O = TBi (2)PHNG ab zo q ru H2O
83): FSP TBi (2)PHNG ILM CHLR zo q H2O = GARNET TBi (2)PHNG ILM CHLR zo q H2O																							83): FSP TBi (2)PHNG zo q ru H2O = FSP TBi (2)PHNG CHLR zo q ru H2O
84): GARNET TBi (2)PHNG CHLR zo q ru H2O = GARNET TBi (2)PHNG ILM CHLR zo q ru H2O																							84): FSP TBi (2)PHNG CHLR zo q ru H2O = FSP TBi (2)PHNG CHLR q ru H2O
85): FSP GARNET TBi (2)PHNG ILM zo q ru H2O = GARNET TBi (2)PHNG ILM ab zo q ru H2O																							85): FSP GARNET TBi (2)PHNG ILM q ru H2O = FSP TBi (2)PHNG ILM zo q ru H2O
86): GARNET TBi (2)PHNG ab zo q ru H2O = GARNET TBi (2)PHNG ILM ab zo q ru H2O																							86): FSP GARNET TBi (2)PHNG ILM q ru H2O = FSP TBi (2)PHNG ILM q ru H2O
87): FSP GARNET TBi PHNG ILM STAU q H2O = FSP TBi PHNG ILM STAU q H2O																							87): FSP GARNET TBi (2)PHNG ILM zo q ru H2O = FSP GARNET TBi (2)PHNG zo q ru H2O
88): FSP GARNET TBi (2)PHNG ILM q ru H2O = FSP GARNET TBi (2)PHNG q ru H2O																							88): FSP TBi PHNG CHLR ab q ru H2O = FSP TBi (2)PHNG CHLR q ru H2O
89): FSP GARNET TBi PHNG ILM STAU q ru H2O = FSP GARNET TBi PHNG ILM STAU q H2O																							89): FSP TBi (2)PHNG ILM STAU sill q H2O = FSP TBi (2)PHNG ILM STAU and q H2O
90): FSP GARNET TBi PHNG ILM q ru H2O = FSP GARNET TBi PHNG ILM STAU q ru H2O																							90): FSP TBi (2)PHNG ILM STAU sill q H2O = FSP TBi PHNG ILM STAU sill q H2O
91): FSP GARNET TBi PHNG ILM sill q H2O = FSP GARNET TBi PHNG ILM sill q ru H2O																							91): FSP TBi PHNG ILM STAU ky q H2O = FSP TBi PHNG ILM sill q H2O
92): FSP GARNET TBi PHNG sill q ru H2O = FSP GARNET TBi PHNG ILM sill q ru H2O																							92): FSP TBi (2)PHNG zo q ru H2O = FSP TBi (2)PHNG CHLR zo q ru H2O
93): FSP GARNET TBi PHNG sill q ru H2O = FSP GARNET TBi PHNG ky q ru H2O																							93): FSP TBi (2)PHNG zo q ru H2O = FSP TBi (2)PHNG CHLR zo q ru H2O
94): FSP GARNET TBi PHNG ILM CHLR STAU q H2O = FSP GARNET TBi (2)PHNG ILM CHLR STAU q H2O																							94): FSP TBi (2)PHNG CHLR zo q ru H2O = FSP TBi (2)PHNG CHLR q ru H2O
95): FSP TBi PHNG ILM STAU q H2O = FSP TBi PHNG ILM STAU sill q H2O																							95): FSP TBi (2)PHNG CHLR zo q ru H2O = FSP TBi (2)PHNG CHLR q ru H2O
96): TBi PHNG ILM CHLR ab zo q sph H2O = TBi PHNG ILM CHLR ab zo q H2O																							96): FSP TBi (2)PHNG zo q ru H2O = FSP TBi (2)PHNG CHLR q ru H2O
97): TBi PHNG ILM CHLR ab zo q H2O = FSP TBi PHNG ILM CHLR ab zo q H2O																							97): FSP GARNET TBi (2)PHNG q ru H2O = FSP GARNET TBi (2)PHNG STAU q ru H2O
98): FSP TBi PHNG ILM CHLR ab zo q H2O = FSP TBi PHNG ILM CHLR zo q H2O																							98): FSP GARNET TBi (2)PHNG STAU q ru H2O = FSP GARNET TBi PHNG STAU q ru H2O
99): FSP TBi PHNG ILM CHLR zo q H2O = TBi PHNG ILM CHLR ab zo q H2O																							99): FSP GARNET TBi PHNG STAU q ru H2O = FSP GARNET TBi PHNG ILM STAU q ru H2O
100): TBi PHNG ILM CHLR ab zo q H2O = TBi PHNG ILM CHLR ab zo q ru H2O																							100): (2)FSP TBi PHNG ILM sill q ru H2O = (2)FSP TBi PHNG sill q ru H2O
101): TBi PHNG ILM CHLR ab zo q ru H2O = TBi PHNG ILM CHLR ab zo q sph H2O																							101): FSP TBi PHNG ILM sill q ru H2O = (2)FSP TBi PHNG ILM sill q ru H2O
102): FSP GARNET TBi (2)PHNG ILM zo q H2O = FSP GARNET TBi (2)PHNG ILM CHLR zo q H2O																							102): FSP GARNET TBi (2)PHNG ILM q ru H2O = FSP TBi (2)PHNG ILM q H2O
103): FSP GARNET TBi (2)PHNG ILM zo q H2O = FSP GARNET TBi (2)PHNG ILM CHLR zo q H2O																							103): FSP GARNET TBi (2)PHNG ILM q ru H2O = FSP GARNET TBi (2)PHNG ILM STAU q H2O
104): FSP GARNET TBi (2)PHNG ILM CHLR zo q H2O = FSP GARNET TBi PHNG ILM CHLR zo q H2O																							104): FSP GARNET TBi PHNG ILM STAU q ru H2O = FSP GARNET TBi PHNG ILM STAU ky q H2O
105): FSP GARNET TBi (2)PHNG ILM CHLR zo q H2O = FSP GARNET TBi PHNG ILM CHLR zo q H2O																							105): FSP TBi (2)PHNG ILM sill q H2O = FSP TBi (2)PHNG ILM and q H2O
106): FSP GARNET TBi (2)PHNG ILM zo q H2O = FSP GARNET TBi PHNG ILM CHLR zo q H2O																							106): FSP TBi (2)PHNG zo q ru H2O = FSP TBi (2)PHNG CHLR q ru H2O
107): FSP GARNET TBi (2)PHNG ILM zo q H2O = FSP GARNET TBi PHNG ILM CHLR zo q H2O																							107): FSP TBi PHNG ILM STAU ky q H2O = FSP GARNET TBi PHNG ILM ky q H2O
108): TBi PHNG ILM CHLR ab zo q sph H2O = TBi (2)PHNG ILM CHLR ab zo q sph H2O																							108): FSP GARNET TBi PHNG ILM ky q H2O = FSP TBi PHNG ILM sill q H2O
109): TBi (2)PHNG ILM CHLR ab zo q sph H2O = TBi PHNG ILM CHLR ab zo q sph H2O																							109): FSP TBi (2)PHNG ILM zo q ru H2O = FSP GARNET TBi (2)PHNG zo q ru H2O
110): TBi (2)PHNG ILM CHLR ab zo q H2O = TBi (2)PHNG ILM CHLR ab zo q sph H2O																							110): FSP GARNET TBi PHNG ILM STAU q ru H2O = FSP GARNET TBi PHNG ILM ky q ru H2O
111): FSP GARNET TBi (2)PHNG ILM zo q H2O = FSP GARNET TBi (2)PHNG ILM q H2O																							111): FSP GARNET TBi (2)PHNG q ru H2O = FSP GARNET TBi PHNG ILM STAU q ru H2O
112): GARNET TBi (2)PHNG ILM CHLR zo q ru H2O = GARNET TBi (2)PHNG ILM zo q ru H2O																							112): FSP GARNET TBi (2)PHNG q ru H2O = FSP GARNET TBi PHNG STAU q ru H2O
113): GARNET TBi (2)PHNG ILM zo q ru H2O = GARNET TBi (2)PHNG ILM ab zo q ru H2O																							113): FSP GARNET TBi PHNG STAU q ru H2O = FSP GARNET TBi PHNG ky q ru H2O
114): GARNET TBi (2)PHNG ILM zo q H2O = GARNET TBi (2)PHNG ILM zo q ru H2O																							114): FSP TBi (2)PHNG zo q ru H2O = FSP TBi (2)PHNG CHLR q ru H2O
115): GARNET TBi (2)PHNG zo q ru H2O = GARNET TBi (2)PHNG ILM zo q ru H2O																							115): FSP TBi PHNG ILM CHLR ab q ru H2O = FSP TBi (2)PHNG CHLR q ru H2O
116): FSP GARNET TBi PHNG ILM q ru H2O = FSP GARNET TBi PHNG ILM q H2O																							116): FSP GARNET TBi (2)PHNG ILM q H2O = FSP TBi (2)PHNG ILM STAU q H2O
117): FSP TBi PHNG ILM CHLR q sph H2O = FSP TBi PHNG ILM CHLR q H2O																							117): FSP TBi PHNG ILM sill q ru H2O = (2)FSP TBi PHNG sill q ru H2O
118): GARNET TBi PHNG CHLR ab zo q sph H2O = TBi PHNG ILM CHLR ab zo q sph H2O																							118): (2)FSP TBi PHNG sill q ru H2O = (2)FSP TBi ILM sill q ru H2O
119): TBi (2)PHNG ILM CHLR ab zo q sph H2O = TBi (2)PHNG ILM CHLR zo q sph H2O																							119): TBi PHNG CHLR ab zo q ru H2O = TBi (2)PHNG ab zo q ru H2O
120): FSP GARNET TBi (2)PHNG ILM zo q H2O = FSP GARNET TBi (2)PHNG ILM CHLR zo q H2O																							120): FSP TBi (2)PHNG zo q ru H2O = FSP TBi (2)PHNG CHLR zo q ru H2O
121): FSP GARNET TBi (2)PHNG ILM CHLR zo q H2O = FSP GARNET TBi PHNG ILM CHLR zo q H2O																							121): FSP TBi (2)PHNG CHLR zo q ru H2O = FSP TBi (2)PHNG CHLR q ru H2O
122): FSP GARNET TBi PHNG ILM STAU q ru H2O = FSP GARNET TBi PHNG ILM STAU ky q H2O																							122): FSP TBi (2)PHNG zo q ru H2O = FSP TBi (2)PHNG ILM CHLR q ru H2O
123): GARNET TBi (2)PHNG CHLR zo q sph H2O = GARNET TBi (2)PHNG CHLR zo q ru H2O																							123): FSP GARNET TBi (2)PHNG ILM q ru H2O = FSP GARNET TBi (2)PHNG ILM STAU q ru H2O
124): TBi PHNG CHLR ab zo q sph H2O = FSP TBi PHNG ILM CHLR ab q sph H2O																							124): FSP GARNET TBi (2)PHNG ILM STAU q ru H2O = FSP GARNET TBi (2)PHNG ILM STAU q H2O
125): FSP TBi PHNG ILM CHLR q sph H2O = FSP TBi PHNG ILM CHLR q ru H2O																							125): FSP GARNET TBi (2)PHNG ILM q ru H2O = FSP GARNET TBi (2)PHNG ILM STAU q H2O
126): FSP GARNET TBi PHNG ILM CHLR q H2O = FSP GARNET TBi (2)PHNG ILM CHLR STAU q H2O																							126): FSP GARNET TBi (2)PHNG STAU q ru H2O = FSP GARNET TBi PHNG ILM STAU q ru H2O
127): FSP GARNET TBi PHNG ILM STAU ky q H2O = FSP GARNET TBi PHNG ILM STAU sill q H2O
128): FSP GARNET TBi PHNG ILM CHLR zo q H2O = FSP GARNET TBi (2)PHNG ILM zo q H2O
129): FSP GARNET TBi (2)PHNG ILM CHLR q H2O = FSP GARNET TBi (2)PHNG ILM STAU q H2O
130): TBi PHNG ILM CHLR ab zo q H2O = TBi (2)PHNG ILM CHLR ab zo q H2O
131): TBi PHNG ILM CHLR ab zo q sph H2O = TBi (2)PHNG ILM CHLR ab zo q H2O
132): GARNET TBi (2)PHNG ILM CHLR zo q H2O = FSP GARNET TBi (2)PHNG ILM CHLR zo q H2O
133): FSP GARNET TBi (2)PHNG ILM CHLR zo q H2O = FSP TBi PHNG ILM CHLR zo q H2O
134): FSP TBi (2)PHNG ILM CHLR zo q H2O = FSP GARNET TBi (2)PHNG ILM CHLR zo q H2O
135): FSP GARNET TBi PHNG ILM ky q ru H2O = FSP GARNET TBi PHNG ILM STAU q ru H2O
136): FSP GARNET TBi PHNG STAU q ru H2O = FSP GARNET TBi PHNG ILM STAU q ru H2O
137): FSP GARNET TBi PHNG q ru H2O = FSP GARNET TBi PHNG STAU q ru H2O
138): GARNET TBi (2)PHNG CHLR zo q sph H2O = GARNET TBi (2)PHNG ILM CHLR zo q ru H2O
139): GARNET TBi (2)PHNG CHLR zo q sph H2O = GARNET TBi (2)PHNG ILM CHLR zo q ru H2O
140): GARNET TBi (2)PHNG ILM ab zo q ru H2O = GARNET TBi (2)PHNG ILM ab zo q H2O
141): FSP GARNET TBi (2)PHNG ILM zo q H2O = FSP GARNET TBi (2)PHNG ILM CHLR zo q H2O
142): FSP GARNET TBi (2)PHNG ILM CHLR zo q H2O = FSP GARNET TBi PHNG ILM CHLR zo q H2O
143): FSP GARNET TBi (2)PHNG ILM zo q H2O = FSP GARNET TBi PHNG ILM CHLR zo q H2O
144): FSP TBi PHNG ILM STAU q H2O = FSP GARNET TBi PHNG ILM STAU sill q H2O
145): TBi PHNG ILM CHLR ab zo q sph H2O = FSP TBi PHNG ILM CHLR ab q sph H2O
146): TBi PHNG ILM CHLR ab zo q H2O = FSP TBi PHNG ILM CHLR zo q H2O
147): FSP GARNET TBi (2)PHNG ILM q H2O = FSP GARNET TBi PHNG ILM STAU q H2O
148): GARNET TBi (2)PHNG CHLR ab zo q sph H2O = TBi (2)PHNG ILM CHLR zo q sph H2O
149): FSP GARNET TBi PHNG ILM ky q ru H2O = FSP GARNET TBi PHNG ILM sill q ru H2O
150): FSP GARNET TBi (2)PHNG ILM zo q H2O = FSP GARNET TBi PHNG ILM CHLR zo q H2O
151): FSP GARNET TBi (2)PHNG ILM zo q H2O = FSP GARNET TBi (2)PHNG ILM CHLR zo q H2O
152): FSP GARNET TBi (2)PHNG ILM CHLR zo q H2O = FSP GARNET TBi PHNG ILM CHLR zo q H2O
153): FSP GARNET TBi (2)PHNG ILM zo q H2O = FSP GARNET TBi PHNG ILM CHLR zo q H2O
154): TBi PHNG ILM CHLR ab zo q sph H2O = FSP TBi PHNG ILM CHLR q sph H2O
155): TBi PHNG ILM CHLR ab zo q sph H2O = FSP TBi PHNG ILM CHLR zo q H2O
156): GARNET TBi (2)PHNG CHLR ab zo q sph H2O = TBi (2)PHNG ILM CHLR ab zo q sph H2O
157): TBi PHNG ILM CHLR ab zo q ru H2O = TBi (2)PHNG ILM CHLR ab zo q H2O
158): TBi (2)PHNG ILM CHLR ab zo q H2O = FSP TBi PHNG ILM CHLR zo q H2O
159): TBi (2)PHNG ILM CHLR ab zo q sph H2O = TBi (2)PHNG ILM CHLR zo q H2O
160): FSP GARNET TBi PHNG ILM ky q ru H2O = FSP GARNET TBi PHNG ILM sill q H2O
161): GARNET TBi (2)PHNG CHLR ab zo q sph H2O = GARNET TBi (2)PHNG ILM CHLR zo q sph H2O
162): FSP GARNET TBi PHNG ky q ru H2O = FSP GARNET TBi PHNG ILM sill q ru H2O
163): GARNET TBi (2)PHNG ILM zo q ru H2O = GARNET TBi (2)PHNG ILM ab zo q H2O
164): FSP GARNET TBi (2)PHNG ILM zo q H2O = FSP GARNET TBi (2)PHNG ILM CHLR zo q H2O
165): FSP GARNET TBi (2)PHNG ILM CHLR zo q H2O = FSP GARNET TBi PHNG ILM CHLR zo q H2O
166): GARNET TBi (2)PHNG CHLR zo q sph H2O = GARNET TBi (2)PHNG CHLR zo q ru sph H2O
167): GARNET TBi (2)PHNG CHLR zo q ru sph H2O = GARNET TBi (2)PHNG ILM CHLR zo q ru H2O
168): FSP GARNET TBi PHNG ILM CHLR STAU q H2O = FSP TBi PHNG ILM STAU q H2O
169): FSP GARNET TBi PHNG ILM CHLR STAU q H2O = FSP GARNET TBi (2)PHNG ILM STAU q H2O
170): FSP GARNET TBi (2)PHNG ILM CHLR q H2O = FSP GARNET TBi (2)PHNG ILM STAU q H2O
171): FSP GARNET TBi (2)PHNG ILM CHLR STAU q H2O = FSP GARNET TBi (2)PHNG ILM STAU q H2O
172): FSP GARNET TBi (2)PHNG ILM CHLR q H2O = FSP GARNET TBi (2)PHNG ILM CHLR STAU q H2O
173): GARNET TBi PHNG ILM CHLR ab zo q sph H2O = TBi (2)PHNG ILM CHLR ab zo q sph H2O
174): TBi (2)PHNG ILM CHLR ab zo q H2O = FSP TBi (2)PHNG ILM CHLR zo q H2O
175): TBi (2)PHNG ILM CHLR ab zo q sph H2O = TBi (2)PHNG ILM CHLR ab zo q H2O
176): FSP GARNET TBi (2)PHNG ILM zo q H2O = FSP GARNET TBi (2)PHNG ILM q ru H2O
177): FSP GARNET TBi PHNG STAU q ru H2O = FSP GARNET TBi PHNG ky q ru H2O
178): FSP GARNET TBi PHNG STAU ky q ru H2O = FSP GARNET TBi PHNG STAU q ru H2O
179): FSP GARNET TBi PHNG ky q ru H2O = FSP GARNET TBi PHNG STAU ky q ru H2O
180): GARNET TBi (2)PHNG CHLR zo q sph H2O = GARNET TBi (2)PHNG CHLR zo q ru sph H2O
181): GARNET TBi (2)PHNG CHLR zo q ru sph H2O = GARNET TBi (2)PHNG ILM CHLR zo q ru H2O

## Sheet: B-5_6-d
Path B 5_6 diffused composition, core																							Path B 5_6 diffused composition, rim
Core model reactions																							Rim model reactions
1): FSP TBi PHNG CHLR ab q sph H2O = FSP TBi PHNG ILM CHLR ab q sph H2O																							1): TBi PHNG CHLR ab q ru sph H2O = FSP TBi PHNG CHLR ab q ru H2O
2): FSP TBi PHNG ILM CHLR ab q sph H2O = FSP TBi PHNG ILM CHLR q ru sph H2O																							2): FSP TBi PHNG CHLR ab q ru H2O = FSP TBi PHNG ILM CHLR ab q ru H2O
3): FSP TBi PHNG ILM CHLR q ru sph H2O = FSP TBi PHNG ILM CHLR q ru H2O																							3): FSP TBi PHNG ILM CHLR ab q ru H2O = FSP TBi PHNG ILM CHLR ab q H2O
4): FSP TBi PHNG ILM CHLR q ru H2O = FSP TBi PHNG ILM CHLR q H2O																							4): FSP TBi PHNG ILM CHLR ab q H2O = FSP TBi PHNG ILM CHLR q H2O
5): FSP TBi PHNG ILM CHLR q H2O = FSP GARNET TBi PHNG ILM CHLR q H2O																							5): FSP TBi PHNG ILM CHLR q H2O = FSP TBi (2)PHNG ILM CHLR q H2O
6): FSP GARNET TBi PHNG ILM CHLR q H2O = FSP GARNET TBi PHNG ILM CHLR STAU q H2O																							6): FSP TBi (2)PHNG ILM CHLR q H2O = FSP TBi (2)PHNG ILM q H2O
7): FSP GARNET TBi PHNG ILM CHLR STAU q H2O = FSP TBi PHNG ILM CHLR STAU q H2O																							7): FSP TBi (2)PHNG ILM q H2O = FSP TBi (2)PHNG ILM and q H2O
8): FSP TBi PHNG ILM CHLR STAU q H2O = FSP TBi PHNG ILM STAU q H2O																							8): FSP TBi (2)PHNG ILM and q H2O = FSP TBi PHNG ILM and q H2O
9): FSP TBi PHNG ILM STAU q H2O = FSP TBi PHNG ILM STAU and q H2O																							9): FSP TBi PHNG ILM and q H2O = FSP TBi PHNG ILM sill q H2O
10): FSP TBi PHNG ILM STAU and q H2O = FSP TBi PHNG ILM STAU sill q H2O																							10): FSP TBi PHNG ILM sill q H2O = FSP TBi PHNG ILM sill q ru H2O
11): FSP TBi PHNG ILM STAU sill q H2O = FSP GARNET TBi PHNG ILM STAU sill q H2O																							11): FSP TBi PHNG ILM sill q ru H2O = FSP TBi PHNG sill q ru H2O
12): FSP GARNET TBi PHNG ILM STAU sill q H2O = FSP GARNET TBi PHNG ILM sill q H2O																							12): FSP TBi PHNG sill q ru H2O = (2)FSP TBi PHNG sill q ru H2O
13): FSP GARNET TBi PHNG ILM sill q H2O = FSP TBi PHNG ILM sill q H2O																							13): (2)FSP TBi PHNG sill q ru H2O = (2)FSP TBi sill q ru H2O
14): FSP TBi PHNG ILM sill q H2O = (2)FSP TBi PHNG ILM sill q H2O																							14): (2)FSP TBi sill q ru H2O = (2)FSP TBi ILM sill q ru H2O
15): (2)FSP TBi PHNG ILM sill q H2O = (2)FSP TBi ILM sill q H2O																							15): (2)FSP TBi ILM sill q ru H2O = (2)FSP TBi ILM sill q H2O
16): (2)FSP TBi ILM sill q H2O = (2)FSP GARNET TBi ILM sill q H2O																							16): FSP TBi PHNG ILM CHLR ab q ru H2O = FSP TBi PHNG ILM CHLR q ru H2O
17): TBi PHNG CHLR ab zo q sph H2O = FSP TBi PHNG CHLR ab q sph H2O																							17): FSP TBi PHNG ILM CHLR q ru H2O = FSP TBi PHNG ILM CHLR q H2O
18): FSP GARNET TBi PHNG ILM CHLR STAU q H2O = FSP GARNET TBi PHNG ILM STAU q H2O																							18): FSP TBi (2)PHNG ILM q H2O = FSP TBi (2)PHNG ILM STAU q H2O
19): FSP GARNET TBi PHNG ILM STAU q H2O = FSP GARNET TBi PHNG ILM STAU sill q H2O																							19): FSP TBi (2)PHNG ILM STAU q H2O = FSP TBi PHNG ILM STAU q H2O
20): FSP TBi PHNG ILM CHLR ab q sph H2O = FSP TBi PHNG ILM CHLR q sph H2O																							20): FSP TBi PHNG ILM STAU q H2O = FSP TBi PHNG ILM STAU sill q H2O
21): FSP TBi PHNG ILM CHLR q sph H2O = FSP TBi PHNG ILM CHLR q ru sph H2O																							21): FSP TBi PHNG ILM STAU sill q H2O = FSP TBi PHNG ILM sill q H2O
22): FSP TBi PHNG ILM CHLR q sph H2O = FSP TBi PHNG ILM CHLR zo q sph H2O																							22): FSP TBi PHNG ILM CHLR ab q ru H2O = FSP TBi (2)PHNG ILM CHLR q ru H2O
23): FSP TBi PHNG ILM CHLR zo q sph H2O = FSP TBi PHNG ILM CHLR zo q H2O																							23): FSP TBi (2)PHNG ILM CHLR q ru H2O = FSP TBi (2)PHNG ILM CHLR q H2O
24): FSP TBi PHNG ILM CHLR zo q H2O = FSP TBi PHNG ILM CHLR q H2O																							24): FSP TBi PHNG CHLR ab q ru H2O = FSP TBi (2)PHNG CHLR ab q ru H2O
25): TBi PHNG CHLR ab zo q sph H2O = TBi PHNG ILM CHLR ab zo q sph H2O																							25): FSP TBi (2)PHNG CHLR ab q ru H2O = FSP TBi PHNG CHLR ab q ru H2O
26): TBi PHNG ILM CHLR ab zo q sph H2O = FSP TBi PHNG ILM CHLR zo q sph H2O																							26): FSP TBi (2)PHNG CHLR ab q ru H2O = FSP TBi PHNG CHLR ab q ru H2O
27): FSP GARNET TBi (2)PHNG ILM CHLR q H2O = FSP GARNET TBi PHNG ILM CHLR q H2O																							27): FSP TBi (2)PHNG CHLR ab q ru H2O = FSP TBi (2)PHNG CHLR q ru H2O
28): FSP GARNET TBi (2)PHNG ILM CHLR q H2O = FSP GARNET TBi (2)PHNG ILM CHLR STAU q H2O																							28): FSP TBi (2)PHNG CHLR q ru H2O = FSP TBi (2)PHNG CHLR ab q ru H2O
29): FSP GARNET TBi (2)PHNG ILM CHLR STAU q H2O = FSP GARNET TBi (2)PHNG ILM STAU q H2O																							29): FSP TBi (2)PHNG CHLR q ru H2O = FSP TBi (2)PHNG CHLR ab q ru H2O
30): FSP GARNET TBi (2)PHNG ILM STAU q H2O = FSP GARNET TBi PHNG ILM STAU q H2O																							30): FSP TBi (2)PHNG CHLR q ru H2O = FSP TBi (2)PHNG ILM CHLR q ru H2O
31): FSP GARNET TBi PHNG ILM sill q H2O = (2)FSP GARNET TBi PHNG ILM sill q H2O																							31): FSP TBi PHNG ILM sill q ru H2O = (2)FSP TBi PHNG ILM sill q ru H2O
32): (2)FSP GARNET TBi PHNG ILM sill q H2O = (2)FSP GARNET TBi ILM sill q H2O																							32): (2)FSP TBi PHNG ILM sill q ru H2O = (2)FSP TBi ILM sill q ru H2O
33): GARNET TBi PHNG CHLR ab zo q sph H2O = TBi PHNG CHLR ab zo q sph H2O																							33): FSP TBi PHNG CHLR ab q ru H2O = FSP TBi (2)PHNG CHLR q ru H2O
34): GARNET TBi PHNG CHLR ab zo q sph H2O = GARNET TBi PHNG ILM CHLR ab zo q sph H2O																							34): FSP TBi PHNG ILM STAU q H2O = FSP TBi PHNG ILM STAU ky q H2O
35): GARNET TBi PHNG ILM CHLR ab zo q sph H2O = TBi PHNG ILM CHLR ab zo q sph H2O																							35): FSP TBi PHNG ILM STAU ky q H2O = FSP TBi PHNG ILM STAU sill q H2O
36): TBi PHNG ILM CHLR ab zo q sph H2O = TBi (2)PHNG ILM CHLR ab zo q H2O																							36): TBi PHNG CHLR ab q ru sph H2O = TBi (2)PHNG CHLR ab q ru sph H2O
37): TBi (2)PHNG ILM CHLR ab zo q H2O = TBi (2)PHNG ILM CHLR zo q H2O																							37): TBi (2)PHNG CHLR ab q ru sph H2O = TBi (2)PHNG ab q ru sph H2O
38): TBi (2)PHNG ILM CHLR zo q H2O = FSP TBi (2)PHNG ILM CHLR zo q H2O																							38): TBi (2)PHNG ab q ru sph H2O = TBi (2)PHNG ab zo q ru H2O
39): FSP TBi (2)PHNG ILM CHLR zo q H2O = FSP TBi PHNG ILM CHLR zo q H2O																							39): TBi (2)PHNG ab zo q ru H2O = FSP TBi (2)PHNG zo q ru H2O
40): FSP TBi PHNG ILM CHLR zo q H2O = FSP GARNET TBi PHNG ILM CHLR zo q H2O																							40): FSP TBi (2)PHNG zo q ru H2O = FSP TBi (2)PHNG CHLR q ru H2O
41): FSP GARNET TBi PHNG ILM CHLR zo q H2O = FSP GARNET TBi PHNG ILM CHLR q H2O																							41): FSP TBi (2)PHNG ILM CHLR q ru H2O = FSP TBi (2)PHNG ILM q ru H2O
42): FSP GARNET TBi (2)PHNG ILM CHLR q H2O = FSP GARNET TBi (2)PHNG ILM q H2O																							42): FSP TBi (2)PHNG ILM q ru H2O = FSP TBi (2)PHNG ILM q H2O
43): FSP GARNET TBi (2)PHNG ILM q H2O = FSP GARNET TBi (2)PHNG ILM STAU q H2O																							43): FSP TBi PHNG ILM STAU ky q H2O = FSP TBi PHNG ILM ky q H2O
44): FSP GARNET TBi PHNG ILM STAU q H2O = FSP GARNET TBi PHNG ILM STAU ky q H2O																							44): FSP TBi PHNG ILM ky q H2O = FSP TBi PHNG ILM sill q H2O
45): FSP GARNET TBi PHNG ILM STAU ky q H2O = FSP GARNET TBi PHNG ILM ky q H2O																							45): FSP TBi (2)PHNG zo q ru H2O = FSP TBi (2)PHNG ILM zo q ru H2O
46): FSP GARNET TBi PHNG ILM ky q H2O = FSP GARNET TBi PHNG ILM sill q H2O																							46): FSP TBi (2)PHNG ILM zo q ru H2O = FSP TBi (2)PHNG ILM q ru H2O
47): GARNET TBi PHNG CHLR ab zo q sph H2O = GARNET TBi (2)PHNG CHLR ab zo q sph H2O																							47): FSP TBi (2)PHNG ILM q H2O = FSP GARNET TBi (2)PHNG ILM q H2O
48): GARNET TBi (2)PHNG CHLR ab zo q sph H2O = GARNET TBi (2)PHNG CHLR zo q sph H2O																							48): FSP GARNET TBi (2)PHNG ILM q H2O = FSP GARNET TBi (2)PHNG ILM STAU q H2O
49): GARNET TBi (2)PHNG CHLR zo q sph H2O = GARNET TBi (2)PHNG ILM CHLR zo q sph H2O																							49): FSP GARNET TBi (2)PHNG ILM STAU q H2O = FSP TBi (2)PHNG ILM STAU q H2O
50): GARNET TBi (2)PHNG ILM CHLR zo q sph H2O = TBi (2)PHNG ILM CHLR zo q sph H2O																							50): FSP GARNET TBi (2)PHNG ILM STAU q H2O = FSP GARNET TBi PHNG ILM STAU q H2O
51): TBi (2)PHNG ILM CHLR zo q sph H2O = TBi (2)PHNG ILM CHLR zo q H2O																							51): FSP GARNET TBi PHNG ILM STAU q H2O = FSP GARNET TBi PHNG ILM STAU ky q H2O
52): TBi (2)PHNG ILM CHLR zo q H2O = GARNET TBi (2)PHNG ILM CHLR zo q H2O																							52): FSP GARNET TBi PHNG ILM STAU ky q H2O = FSP GARNET TBi PHNG ILM ky q H2O
53): GARNET TBi (2)PHNG ILM CHLR zo q H2O = GARNET TBi (2)PHNG ILM zo q H2O																							53): FSP GARNET TBi PHNG ILM ky q H2O = FSP TBi PHNG ILM ky q H2O
54): GARNET TBi (2)PHNG ILM zo q H2O = FSP GARNET TBi (2)PHNG ILM zo q H2O																							54): FSP TBi (2)PHNG zo q ru H2O = FSP GARNET TBi (2)PHNG zo q ru H2O
55): FSP GARNET TBi (2)PHNG ILM zo q H2O = FSP GARNET TBi (2)PHNG ILM CHLR q H2O																							55): FSP GARNET TBi (2)PHNG zo q ru H2O = FSP GARNET TBi (2)PHNG q ru H2O
56): FSP GARNET TBi (2)PHNG ILM q H2O = FSP GARNET TBi PHNG ILM q H2O																							56): FSP GARNET TBi (2)PHNG q ru H2O = FSP GARNET TBi (2)PHNG ILM q ru H2O
57): FSP GARNET TBi PHNG ILM q H2O = FSP GARNET TBi PHNG ILM STAU q H2O																							57): FSP GARNET TBi (2)PHNG ILM q ru H2O = FSP GARNET TBi (2)PHNG ILM q H2O
58): GARNET TBi (2)PHNG ILM CHLR zo q sph H2O = GARNET TBi (2)PHNG ILM CHLR zo q H2O																							58): FSP GARNET TBi (2)PHNG q ru H2O = FSP GARNET TBi PHNG q ru H2O
59): FSP GARNET TBi (2)PHNG ILM zo q H2O = FSP GARNET TBi (2)PHNG ILM zo q ru H2O																							59): FSP GARNET TBi PHNG q ru H2O = FSP GARNET TBi PHNG ky q ru H2O
60): FSP GARNET TBi (2)PHNG ILM zo q ru H2O = FSP GARNET TBi (2)PHNG ILM q ru H2O																							60): FSP GARNET TBi PHNG ky q ru H2O = FSP GARNET TBi PHNG ILM ky q ru H2O
61): FSP GARNET TBi (2)PHNG ILM q ru H2O = FSP GARNET TBi (2)PHNG ILM q H2O																							61): FSP GARNET TBi PHNG ILM ky q ru H2O = FSP GARNET TBi PHNG ILM ky q H2O
62): FSP GARNET TBi (2)PHNG ILM q ru H2O = FSP GARNET TBi PHNG ILM q ru H2O																							62): TBi (2)PHNG CHLR ab q ru sph H2O = TBi (2)PHNG CHLR q ru sph H2O
63): FSP GARNET TBi PHNG q ru H2O = FSP GARNET TBi PHNG ILM q ru H2O																							63): TBi (2)PHNG CHLR q ru sph H2O = TBi (2)PHNG q ru sph H2O
64): FSP GARNET TBi PHNG q ru H2O = FSP GARNET TBi PHNG ky q ru H2O																							64): TBi (2)PHNG q ru sph H2O = TBi (2)PHNG ab q ru sph H2O
65): FSP GARNET TBi PHNG ky q ru H2O = FSP GARNET TBi PHNG ILM ky q ru H2O																							65): FSP TBi (2)PHNG ILM zo q ru H2O = FSP TBi (2)PHNG ILM CHLR q ru H2O
66): FSP GARNET TBi PHNG ILM ky q ru H2O = FSP GARNET TBi PHNG ILM ky q H2O																							66): FSP TBi (2)PHNG ILM q ru H2O = FSP GARNET TBi (2)PHNG ILM q ru H2O
67): GARNET TBi (2)PHNG ILM CHLR zo q sph H2O = GARNET TBi (2)PHNG ILM CHLR zo q ru H2O																							67): FSP GARNET TBi PHNG ILM STAU ky q H2O = FSP TBi PHNG ILM STAU ky q H2O
68): GARNET TBi (2)PHNG ILM CHLR zo q ru H2O = GARNET TBi (2)PHNG ILM CHLR zo q H2O																							68): FSP GARNET TBi PHNG ILM sill q H2O = FSP TBi PHNG ILM sill q H2O
69): GARNET TBi (2)PHNG ILM zo q H2O = GARNET TBi (2)PHNG ILM ab zo q H2O																							69): FSP GARNET TBi PHNG ILM sill q H2O = FSP GARNET TBi PHNG ILM ky q H2O
70): GARNET TBi (2)PHNG ILM ab zo q H2O = FSP GARNET TBi (2)PHNG ILM zo q H2O																							70): TBi PHNG CHLR ab q ru sph H2O = TBi PHNG CHLR ab zo q ru H2O
71): FSP GARNET TBi (2)PHNG ILM zo q ru H2O = FSP GARNET TBi (2)PHNG zo q ru H2O																							71): TBi PHNG CHLR ab zo q ru H2O = FSP TBi PHNG CHLR ab q ru H2O
72): FSP GARNET TBi (2)PHNG zo q ru H2O = FSP GARNET TBi (2)PHNG q ru H2O																							72): TBi (2)PHNG CHLR ab zo q ru H2O = TBi PHNG CHLR ab zo q ru H2O
73): FSP GARNET TBi (2)PHNG q ru H2O = FSP GARNET TBi PHNG q ru H2O																							73): TBi PHNG CHLR ab zo q ru H2O = TBi (2)PHNG CHLR ab zo q ru H2O
74): GARNET TBi (2)PHNG CHLR zo q sph H2O = GARNET TBi (2)PHNG CHLR zo q ru sph H2O																							74): TBi (2)PHNG ab q ru sph H2O = TBi (2)PHNG CHLR ab zo q ru H2O
75): GARNET TBi (2)PHNG CHLR zo q ru sph H2O = GARNET TBi (2)PHNG CHLR zo q ru H2O																							75): FSP TBi PHNG CHLR ab q ru H2O = FSP TBi (2)PHNG CHLR q ru H2O
76): GARNET TBi (2)PHNG CHLR zo q ru H2O = GARNET TBi (2)PHNG zo q ru H2O																							76): FSP TBi (2)PHNG ILM STAU q H2O = FSP TBi (2)PHNG ILM STAU sill q H2O
77): GARNET TBi (2)PHNG zo q ru H2O = GARNET TBi (2)PHNG ab zo q ru H2O																							77): FSP TBi (2)PHNG ILM STAU sill q H2O = FSP TBi (2)PHNG ILM sill q H2O
78): GARNET TBi (2)PHNG ab zo q ru H2O = FSP GARNET TBi (2)PHNG zo q ru H2O																							78): FSP TBi (2)PHNG ILM sill q H2O = FSP TBi PHNG ILM sill q H2O
79): GARNET (2)PHNG CHLR ab zo q sph H2O = GARNET TBi (2)PHNG CHLR ab zo q sph H2O																							79): (2)FSP TBi PHNG ILM sill q ru H2O = (2)FSP TBi PHNG sill q ru H2O
80): GARNET TBi (2)PHNG CHLR zo q sph H2O = GARNET TBi (2)PHNG CHLR zo q ru H2O																							80): FSP GARNET TBi PHNG ILM STAU q H2O = FSP TBi PHNG ILM STAU q H2O
81): GARNET PHNG CHLR ab zo q sph H2O = GARNET TBi PHNG CHLR ab zo q sph H2O																							81): FSP TBi PHNG CHLR ab q ru H2O = FSP TBi (2)PHNG CHLR q ru H2O
82): GARNET (2)PHNG CHLR ab zo q sph H2O = GARNET PHNG CHLR ab zo q sph H2O																							82): FSP TBi PHNG CHLR ab q ru H2O = FSP TBi (2)PHNG CHLR q ru H2O
83): FSP TBi (2)PHNG ILM CHLR zo q H2O = GARNET TBi (2)PHNG ILM CHLR zo q H2O																							83): FSP GARNET TBi (2)PHNG ILM zo q ru H2O = FSP TBi (2)PHNG ILM zo q ru H2O
84): GARNET TBi (2)PHNG CHLR zo q ru H2O = GARNET TBi (2)PHNG ILM CHLR zo q ru H2O																							84): FSP GARNET TBi (2)PHNG ILM zo q ru H2O = FSP GARNET TBi (2)PHNG ILM q ru H2O
85): FSP GARNET TBi (2)PHNG ILM zo q ru H2O = GARNET TBi (2)PHNG ILM ab zo q ru H2O																							85): FSP GARNET TBi (2)PHNG q ru H2O = FSP GARNET TBi (2)PHNG STAU q ru H2O
86): GARNET TBi (2)PHNG ab zo q ru H2O = GARNET TBi (2)PHNG ILM ab zo q ru H2O																							86): FSP GARNET TBi (2)PHNG STAU q ru H2O = FSP GARNET TBi PHNG STAU q ru H2O
87): FSP GARNET TBi PHNG ILM STAU q H2O = FSP TBi PHNG ILM STAU q H2O																							87): FSP GARNET TBi PHNG STAU q ru H2O = FSP GARNET TBi PHNG STAU ky q ru H2O
88): FSP GARNET TBi (2)PHNG ILM q ru H2O = FSP GARNET TBi (2)PHNG q ru H2O																							88): FSP GARNET TBi PHNG STAU ky q ru H2O = FSP GARNET TBi PHNG ky q ru H2O
89): FSP GARNET TBi PHNG ILM STAU q ru H2O = FSP GARNET TBi PHNG ILM STAU q H2O																							89): FSP GARNET TBi (2)PHNG ILM STAU q H2O = FSP GARNET TBi (2)PHNG ILM STAU q ru H2O
90): FSP GARNET TBi PHNG ILM q ru H2O = FSP GARNET TBi PHNG ILM STAU q ru H2O																							90): FSP GARNET TBi (2)PHNG ILM STAU q ru H2O = FSP GARNET TBi (2)PHNG ILM q ru H2O
91): FSP GARNET TBi PHNG ILM sill q H2O = FSP GARNET TBi PHNG ILM sill q ru H2O																							91): FSP TBi PHNG ILM CHLR q ru H2O = FSP TBi (2)PHNG ILM CHLR q ru H2O
92): FSP GARNET TBi PHNG sill q ru H2O = FSP GARNET TBi PHNG ILM sill q ru H2O																							92): FSP TBi PHNG CHLR ab q ru H2O = FSP TBi (2)PHNG CHLR q ru H2O
93): FSP GARNET TBi PHNG sill q ru H2O = FSP GARNET TBi PHNG ky q ru H2O																							93): FSP TBi PHNG CHLR ab q ru H2O = FSP TBi (2)PHNG CHLR ab q ru H2O
94): FSP GARNET TBi PHNG ILM CHLR STAU q H2O = FSP GARNET TBi (2)PHNG ILM CHLR STAU q H2O																							94): FSP TBi (2)PHNG CHLR ab q ru H2O = FSP TBi (2)PHNG CHLR q ru H2O
95): FSP TBi PHNG ILM STAU q H2O = FSP TBi PHNG ILM STAU sill q H2O																							95): TBi (2)PHNG CHLR ab zo q ru H2O = TBi (2)PHNG ab zo q ru H2O
96): TBi PHNG ILM CHLR ab zo q sph H2O = TBi PHNG ILM CHLR ab zo q H2O																							96): TBi (2)PHNG ab zo q ru H2O = TBi (2)PHNG CHLR ab zo q ru H2O
97): TBi PHNG ILM CHLR ab zo q H2O = FSP TBi PHNG ILM CHLR ab zo q H2O																							97): FSP GARNET TBi (2)PHNG ILM zo q ru H2O = FSP GARNET TBi (2)PHNG zo q ru H2O
98): FSP TBi PHNG ILM CHLR ab zo q H2O = FSP TBi PHNG ILM CHLR zo q H2O																							98): FSP TBi (2)PHNG ILM sill q H2O = FSP TBi (2)PHNG ILM and q H2O
99): FSP TBi PHNG ILM CHLR zo q H2O = TBi PHNG ILM CHLR ab zo q H2O																							99): FSP TBi (2)PHNG ILM STAU sill q H2O = FSP TBi PHNG ILM STAU sill q H2O
100): TBi PHNG ILM CHLR ab zo q H2O = TBi PHNG ILM CHLR ab zo q ru H2O																							100): FSP GARNET TBi (2)PHNG ILM STAU q H2O = FSP TBi PHNG ILM STAU q H2O
101): TBi PHNG ILM CHLR ab zo q ru H2O = TBi PHNG ILM CHLR ab zo q sph H2O																							101): FSP TBi PHNG CHLR ab q ru H2O = FSP TBi (2)PHNG CHLR q ru H2O
102): FSP GARNET TBi (2)PHNG ILM zo q H2O = FSP GARNET TBi (2)PHNG ILM CHLR zo q H2O																							102): FSP TBi PHNG CHLR ab q ru H2O = FSP TBi (2)PHNG CHLR q ru H2O
103): FSP GARNET TBi (2)PHNG ILM zo q H2O = FSP GARNET TBi (2)PHNG ILM CHLR zo q H2O																							103): FSP TBi PHNG CHLR ab q ru H2O = FSP TBi (2)PHNG CHLR ab q ru H2O
104): FSP GARNET TBi (2)PHNG ILM CHLR zo q H2O = FSP GARNET TBi PHNG ILM CHLR zo q H2O																							104): FSP TBi (2)PHNG CHLR ab q ru H2O = FSP TBi (2)PHNG CHLR q ru H2O
105): FSP GARNET TBi (2)PHNG ILM CHLR zo q H2O = FSP GARNET TBi PHNG ILM CHLR zo q H2O																							105): FSP TBi PHNG CHLR ab q ru H2O = FSP TBi (2)PHNG CHLR ab q ru H2O
106): FSP GARNET TBi (2)PHNG ILM zo q H2O = FSP GARNET TBi PHNG ILM CHLR zo q H2O																							106): FSP TBi (2)PHNG CHLR ab q ru H2O = FSP TBi (2)PHNG CHLR q ru H2O
107): FSP GARNET TBi (2)PHNG ILM zo q H2O = FSP GARNET TBi PHNG ILM CHLR zo q H2O																							107): FSP GARNET TBi PHNG STAU q ru H2O = FSP GARNET TBi PHNG ILM STAU q ru H2O
108): TBi PHNG ILM CHLR ab zo q sph H2O = TBi (2)PHNG ILM CHLR ab zo q sph H2O																							108): FSP GARNET TBi PHNG ILM STAU q ru H2O = FSP GARNET TBi PHNG ILM ky q ru H2O
109): TBi (2)PHNG ILM CHLR ab zo q sph H2O = TBi PHNG ILM CHLR ab zo q sph H2O																							109): FSP GARNET TBi PHNG ILM STAU q ru H2O = FSP GARNET TBi PHNG ILM STAU q H2O
110): TBi (2)PHNG ILM CHLR ab zo q H2O = TBi (2)PHNG ILM CHLR ab zo q sph H2O																							110): FSP GARNET TBi (2)PHNG q ru H2O = FSP GARNET TBi PHNG ky q ru H2O
111): FSP GARNET TBi (2)PHNG ILM zo q H2O = FSP GARNET TBi (2)PHNG ILM q H2O																							111): FSP TBi PHNG CHLR ab q ru H2O = FSP TBi (2)PHNG CHLR ab q ru H2O
112): GARNET TBi (2)PHNG ILM CHLR zo q ru H2O = GARNET TBi (2)PHNG ILM zo q ru H2O																							112): FSP TBi (2)PHNG CHLR ab q ru H2O = FSP TBi (2)PHNG CHLR q ru H2O
113): GARNET TBi (2)PHNG ILM zo q ru H2O = GARNET TBi (2)PHNG ILM ab zo q ru H2O																							113): FSP TBi PHNG ILM CHLR ab q ru H2O = FSP TBi (2)PHNG CHLR ab q ru H2O
114): GARNET TBi (2)PHNG ILM zo q H2O = GARNET TBi (2)PHNG ILM zo q ru H2O																							114): FSP TBi (2)PHNG CHLR q ru H2O = FSP TBi (2)PHNG CHLR ab q ru H2O
115): GARNET TBi (2)PHNG zo q ru H2O = GARNET TBi (2)PHNG ILM zo q ru H2O																							115): FSP TBi PHNG ILM CHLR ab q ru H2O = FSP TBi PHNG ILM CHLR q H2O
116): FSP GARNET TBi PHNG ILM q ru H2O = FSP GARNET TBi PHNG ILM q H2O																							116): FSP TBi PHNG ILM sill q ru H2O = (2)FSP TBi PHNG sill q ru H2O
117): FSP TBi PHNG ILM CHLR q sph H2O = FSP TBi PHNG ILM CHLR q H2O																							117): FSP TBi PHNG CHLR ab q ru H2O = FSP TBi (2)PHNG CHLR q ru H2O
118): GARNET TBi PHNG CHLR ab zo q sph H2O = TBi PHNG ILM CHLR ab zo q sph H2O																							118): FSP TBi (2)PHNG CHLR zo q ru H2O = FSP TBi (2)PHNG CHLR q ru H2O
119): TBi (2)PHNG ILM CHLR ab zo q sph H2O = TBi (2)PHNG ILM CHLR zo q sph H2O																							119): FSP TBi (2)PHNG zo q ru H2O = FSP TBi (2)PHNG CHLR zo q ru H2O
120): FSP GARNET TBi (2)PHNG ILM zo q H2O = FSP GARNET TBi (2)PHNG ILM CHLR zo q H2O																							120): FSP TBi PHNG CHLR ab q ru H2O = FSP TBi (2)PHNG CHLR q ru H2O
121): FSP GARNET TBi (2)PHNG ILM CHLR zo q H2O = FSP GARNET TBi PHNG ILM CHLR zo q H2O																							121): FSP GARNET TBi (2)PHNG ILM STAU q ru H2O = FSP GARNET TBi PHNG ILM STAU q ru H2O
122): FSP GARNET TBi PHNG ILM STAU q ru H2O = FSP GARNET TBi PHNG ILM STAU ky q H2O																							122): FSP GARNET TBi (2)PHNG q ru H2O = FSP GARNET TBi PHNG ky q ru H2O
123): GARNET TBi (2)PHNG CHLR zo q sph H2O = GARNET TBi (2)PHNG CHLR zo q ru H2O																							123): FSP GARNET TBi PHNG ky q ru H2O = FSP GARNET TBi (2)PHNG ky q ru H2O
124): TBi PHNG CHLR ab zo q sph H2O = FSP TBi PHNG ILM CHLR ab q sph H2O																							124): FSP GARNET TBi (2)PHNG ky q ru H2O = FSP GARNET TBi (2)PHNG q ru H2O
125): FSP TBi PHNG ILM CHLR q sph H2O = FSP TBi PHNG ILM CHLR q ru H2O																							125): TBi PHNG CHLR ab zo q ru H2O = TBi (2)PHNG ab zo q ru H2O
126): FSP GARNET TBi PHNG ILM CHLR q H2O = FSP GARNET TBi (2)PHNG ILM CHLR STAU q H2O																							126): FSP TBi (2)PHNG ILM CHLR q ru H2O = FSP TBi (2)PHNG ILM q H2O
127): FSP GARNET TBi PHNG ILM STAU ky q H2O = FSP GARNET TBi PHNG ILM STAU sill q H2O																							127): FSP TBi (2)PHNG ILM STAU q H2O = FSP TBi (2)PHNG ILM STAU and q H2O
128): FSP GARNET TBi PHNG ILM CHLR zo q H2O = FSP GARNET TBi (2)PHNG ILM zo q H2O																							128): FSP TBi (2)PHNG ILM STAU and q H2O = FSP TBi (2)PHNG ILM and q H2O
129): FSP GARNET TBi (2)PHNG ILM CHLR q H2O = FSP GARNET TBi (2)PHNG ILM STAU q H2O																							129): FSP GARNET TBi (2)PHNG ILM q H2O = FSP TBi (2)PHNG ILM STAU q H2O
130): TBi PHNG ILM CHLR ab zo q H2O = TBi (2)PHNG ILM CHLR ab zo q H2O																							130): FSP TBi PHNG ILM STAU ky q H2O = FSP TBi PHNG ILM sill q H2O
131): TBi PHNG ILM CHLR ab zo q sph H2O = TBi (2)PHNG ILM CHLR ab zo q H2O																							131): FSP TBi PHNG ILM CHLR ab q ru H2O = FSP TBi (2)PHNG CHLR q ru H2O
132): GARNET TBi (2)PHNG ILM CHLR zo q H2O = FSP GARNET TBi (2)PHNG ILM CHLR zo q H2O																							132): FSP GARNET TBi PHNG ILM STAU ky q H2O = FSP GARNET TBi PHNG ILM STAU q ru H2O
133): FSP GARNET TBi (2)PHNG ILM CHLR zo q H2O = FSP TBi PHNG ILM CHLR zo q H2O																							133): FSP GARNET TBi (2)PHNG STAU q ru H2O = FSP GARNET TBi PHNG ILM STAU q ru H2O
134): FSP TBi (2)PHNG ILM CHLR zo q H2O = FSP GARNET TBi (2)PHNG ILM CHLR zo q H2O																							134): FSP GARNET TBi PHNG STAU ky q ru H2O = FSP GARNET TBi PHNG ILM ky q ru H2O
135): FSP GARNET TBi PHNG ILM ky q ru H2O = FSP GARNET TBi PHNG ILM STAU q ru H2O																							135): TBi PHNG CHLR ab zo q ru H2O = TBi (2)PHNG ab zo q ru H2O
136): FSP GARNET TBi PHNG STAU q ru H2O = FSP GARNET TBi PHNG ILM STAU q ru H2O																							136): TBi (2)PHNG CHLR ab zo q ru H2O = TBi PHNG CHLR ab zo q ru H2O
137): FSP GARNET TBi PHNG q ru H2O = FSP GARNET TBi PHNG STAU q ru H2O																							137): TBi (2)PHNG ab zo q ru H2O = TBi (2)PHNG CHLR ab zo q ru H2O
138): GARNET TBi (2)PHNG CHLR zo q sph H2O = GARNET TBi (2)PHNG ILM CHLR zo q ru H2O																							138): FSP TBi PHNG CHLR ab q ru H2O = FSP TBi (2)PHNG CHLR q ru H2O
139): GARNET TBi (2)PHNG CHLR zo q sph H2O = GARNET TBi (2)PHNG ILM CHLR zo q ru H2O																							139): FSP TBi (2)PHNG CHLR ab q ru H2O = FSP TBi PHNG CHLR ab q ru H2O
140): GARNET TBi (2)PHNG ILM ab zo q ru H2O = GARNET TBi (2)PHNG ILM ab zo q H2O																							140): FSP TBi (2)PHNG CHLR q ru H2O = FSP TBi (2)PHNG CHLR ab q ru H2O
141): FSP GARNET TBi (2)PHNG ILM zo q H2O = FSP GARNET TBi (2)PHNG ILM CHLR zo q H2O																							141): FSP TBi (2)PHNG ILM STAU q H2O = FSP TBi (2)PHNG ILM and q H2O
142): FSP GARNET TBi (2)PHNG ILM CHLR zo q H2O = FSP GARNET TBi PHNG ILM CHLR zo q H2O																							142): FSP TBi (2)PHNG ILM STAU q H2O = FSP TBi PHNG ILM STAU sill q H2O
143): FSP GARNET TBi (2)PHNG ILM zo q H2O = FSP GARNET TBi PHNG ILM CHLR zo q H2O																							143): FSP TBi PHNG CHLR ab q ru H2O = FSP TBi (2)PHNG CHLR q ru H2O
144): FSP TBi PHNG ILM STAU q H2O = FSP GARNET TBi PHNG ILM STAU sill q H2O																							144): FSP TBi (2)PHNG CHLR ab q ru H2O = FSP TBi PHNG CHLR ab q ru H2O
145): TBi PHNG ILM CHLR ab zo q sph H2O = FSP TBi PHNG ILM CHLR ab q sph H2O																							145): FSP TBi (2)PHNG CHLR q ru H2O = FSP TBi (2)PHNG CHLR ab q ru H2O
146): TBi PHNG ILM CHLR ab zo q H2O = FSP TBi PHNG ILM CHLR zo q H2O																							146): FSP TBi (2)PHNG zo q ru H2O = FSP TBi (2)PHNG CHLR q ru H2O
147): FSP GARNET TBi (2)PHNG ILM q H2O = FSP GARNET TBi PHNG ILM STAU q H2O																							147): FSP TBi (2)PHNG ILM zo q ru H2O = FSP GARNET TBi (2)PHNG ILM q ru H2O
148): GARNET TBi (2)PHNG CHLR ab zo q sph H2O = TBi (2)PHNG ILM CHLR zo q sph H2O																							148): FSP GARNET TBi (2)PHNG ILM q ru H2O = FSP GARNET TBi (2)PHNG ILM STAU q H2O
149): FSP GARNET TBi PHNG ILM ky q ru H2O = FSP GARNET TBi PHNG ILM sill q ru H2O																							149): FSP TBi PHNG CHLR ab q ru H2O = FSP TBi (2)PHNG CHLR ab q ru H2O
150): FSP GARNET TBi (2)PHNG ILM zo q H2O = FSP GARNET TBi PHNG ILM CHLR zo q H2O																							150): FSP TBi (2)PHNG CHLR ab q ru H2O = FSP TBi (2)PHNG CHLR q ru H2O
151): FSP GARNET TBi (2)PHNG ILM zo q H2O = FSP GARNET TBi (2)PHNG ILM CHLR zo q H2O
152): FSP GARNET TBi (2)PHNG ILM CHLR zo q H2O = FSP GARNET TBi PHNG ILM CHLR zo q H2O
153): FSP GARNET TBi (2)PHNG ILM zo q H2O = FSP GARNET TBi PHNG ILM CHLR zo q H2O
154): TBi PHNG ILM CHLR ab zo q sph H2O = FSP TBi PHNG ILM CHLR q sph H2O
155): TBi PHNG ILM CHLR ab zo q sph H2O = FSP TBi PHNG ILM CHLR zo q H2O
156): GARNET TBi (2)PHNG CHLR ab zo q sph H2O = TBi (2)PHNG ILM CHLR ab zo q sph H2O
157): TBi PHNG ILM CHLR ab zo q ru H2O = TBi (2)PHNG ILM CHLR ab zo q H2O
158): TBi (2)PHNG ILM CHLR ab zo q H2O = FSP TBi PHNG ILM CHLR zo q H2O
159): TBi (2)PHNG ILM CHLR ab zo q sph H2O = TBi (2)PHNG ILM CHLR zo q H2O
160): FSP GARNET TBi PHNG ILM ky q ru H2O = FSP GARNET TBi PHNG ILM sill q H2O
161): GARNET TBi (2)PHNG CHLR ab zo q sph H2O = GARNET TBi (2)PHNG ILM CHLR zo q sph H2O
162): FSP GARNET TBi PHNG ky q ru H2O = FSP GARNET TBi PHNG ILM sill q ru H2O
163): GARNET TBi (2)PHNG ILM zo q ru H2O = GARNET TBi (2)PHNG ILM ab zo q H2O
164): FSP GARNET TBi (2)PHNG ILM zo q H2O = FSP GARNET TBi (2)PHNG ILM CHLR zo q H2O
165): FSP GARNET TBi (2)PHNG ILM CHLR zo q H2O = FSP GARNET TBi PHNG ILM CHLR zo q H2O
166): GARNET TBi (2)PHNG CHLR zo q sph H2O = GARNET TBi (2)PHNG CHLR zo q ru sph H2O
167): GARNET TBi (2)PHNG CHLR zo q ru sph H2O = GARNET TBi (2)PHNG ILM CHLR zo q ru H2O
168): FSP GARNET TBi PHNG ILM CHLR STAU q H2O = FSP TBi PHNG ILM STAU q H2O
169): FSP GARNET TBi PHNG ILM CHLR STAU q H2O = FSP GARNET TBi (2)PHNG ILM STAU q H2O
170): FSP GARNET TBi (2)PHNG ILM CHLR q H2O = FSP GARNET TBi (2)PHNG ILM STAU q H2O
171): FSP GARNET TBi (2)PHNG ILM CHLR STAU q H2O = FSP GARNET TBi (2)PHNG ILM STAU q H2O
172): FSP GARNET TBi (2)PHNG ILM CHLR q H2O = FSP GARNET TBi (2)PHNG ILM CHLR STAU q H2O
173): GARNET TBi PHNG ILM CHLR ab zo q sph H2O = TBi (2)PHNG ILM CHLR ab zo q sph H2O
174): TBi (2)PHNG ILM CHLR ab zo q H2O = FSP TBi (2)PHNG ILM CHLR zo q H2O
175): TBi (2)PHNG ILM CHLR ab zo q sph H2O = TBi (2)PHNG ILM CHLR ab zo q H2O
176): FSP GARNET TBi (2)PHNG ILM zo q H2O = FSP GARNET TBi (2)PHNG ILM q ru H2O
177): FSP GARNET TBi PHNG STAU q ru H2O = FSP GARNET TBi PHNG ky q ru H2O
178): FSP GARNET TBi PHNG STAU ky q ru H2O = FSP GARNET TBi PHNG STAU q ru H2O
179): FSP GARNET TBi PHNG ky q ru H2O = FSP GARNET TBi PHNG STAU ky q ru H2O
180): GARNET TBi (2)PHNG CHLR zo q sph H2O = GARNET TBi (2)PHNG CHLR zo q ru sph H2O
181): GARNET TBi (2)PHNG CHLR zo q ru sph H2O = GARNET TBi (2)PHNG ILM CHLR zo q ru H2O

## Sheet: B-5_8-p
Path B 5_8 primary composition, core																							Path B 5_8 primary composition, rim
Core model reactions																							Rim model reactions
1): FSP TBi PHNG CHLR ab q sph H2O = FSP TBi PHNG CHLR ab q ru H2O																							1): TBi PHNG CHLR ab q ru sph H2O = FSP TBi PHNG CHLR ab q ru H2O
2): FSP TBi PHNG CHLR ab q ru H2O = FSP TBi PHNG CHLR q ru H2O																							2): FSP TBi PHNG CHLR ab q ru H2O = FSP TBi PHNG ILM CHLR ab q ru H2O
3): FSP TBi PHNG CHLR q ru H2O = FSP TBi PHNG ILM CHLR q ru H2O																							3): FSP TBi PHNG ILM CHLR ab q ru H2O = FSP TBi PHNG ILM CHLR q ru H2O
4): FSP TBi PHNG ILM CHLR q ru H2O = FSP TBi PHNG ILM CHLR q H2O																							4): FSP TBi PHNG ILM CHLR q ru H2O = FSP TBi PHNG ILM CHLR q H2O
5): FSP TBi PHNG ILM CHLR q H2O = FSP TBi PHNG ILM CHLR STAU q H2O																							5): FSP TBi PHNG ILM CHLR q H2O = FSP TBi (2)PHNG ILM CHLR q H2O
6): FSP TBi PHNG ILM CHLR STAU q H2O = FSP TBi PHNG ILM STAU q H2O																							6): FSP TBi (2)PHNG ILM CHLR q H2O = FSP TBi (2)PHNG ILM q H2O
7): FSP TBi PHNG ILM STAU q H2O = FSP TBi PHNG ILM STAU and q H2O																							7): FSP TBi (2)PHNG ILM q H2O = FSP TBi (2)PHNG ILM STAU q H2O
8): FSP TBi PHNG ILM STAU and q H2O = FSP TBi PHNG ILM and q H2O																							8): FSP TBi (2)PHNG ILM STAU q H2O = FSP TBi (2)PHNG ILM STAU and q H2O
9): FSP TBi PHNG ILM and q H2O = FSP TBi PHNG ILM sill q H2O																							9): FSP TBi (2)PHNG ILM STAU and q H2O = FSP TBi (2)PHNG ILM and q H2O
10): FSP TBi PHNG ILM sill q H2O = (2)FSP TBi PHNG ILM sill q H2O																							10): FSP TBi (2)PHNG ILM and q H2O = FSP TBi PHNG ILM and q H2O
11): (2)FSP TBi PHNG ILM sill q H2O = (2)FSP TBi ILM sill q H2O																							11): FSP TBi PHNG ILM and q H2O = FSP TBi PHNG ILM sill q H2O
12): TBi PHNG CHLR ab zo q sph H2O = FSP TBi PHNG CHLR ab q sph H2O																							12): FSP TBi PHNG ILM sill q H2O = FSP TBi PHNG ILM sill q ru H2O
13): FSP TBi PHNG ILM STAU q H2O = FSP TBi PHNG ILM STAU sill q H2O																							13): FSP TBi PHNG ILM sill q ru H2O = FSP TBi PHNG sill q ru H2O
14): FSP TBi PHNG ILM STAU sill q H2O = FSP TBi PHNG ILM sill q H2O																							14): FSP TBi PHNG sill q ru H2O = (2)FSP TBi PHNG sill q ru H2O
15): FSP TBi PHNG ILM CHLR q H2O = FSP TBi (2)PHNG ILM CHLR STAU q H2O																							15): (2)FSP TBi PHNG sill q ru H2O = (2)FSP TBi sill q ru H2O
16): FSP TBi (2)PHNG ILM CHLR STAU q H2O = FSP TBi (2)PHNG ILM STAU q H2O																							16): (2)FSP TBi sill q ru H2O = (2)FSP TBi ILM sill q ru H2O
17): FSP TBi (2)PHNG ILM STAU q H2O = FSP TBi PHNG ILM STAU q H2O																							17): (2)FSP TBi ILM sill q ru H2O = (2)FSP TBi ILM sill q H2O
18): FSP TBi PHNG CHLR ab q sph H2O = FSP TBi PHNG CHLR ab q ru sph H2O																							18): FSP TBi (2)PHNG ILM STAU q H2O = FSP TBi PHNG ILM STAU q H2O
19): FSP TBi PHNG CHLR ab q ru sph H2O = FSP TBi PHNG CHLR q ru sph H2O																							19): FSP TBi PHNG ILM STAU q H2O = FSP TBi PHNG ILM STAU sill q H2O
20): FSP TBi PHNG CHLR q ru sph H2O = FSP TBi PHNG CHLR q ru H2O																							20): FSP TBi PHNG ILM STAU sill q H2O = FSP TBi PHNG ILM sill q H2O
21): FSP TBi PHNG ILM CHLR q H2O = FSP TBi (2)PHNG ILM CHLR q H2O																							21): FSP TBi PHNG ILM CHLR q ru H2O = FSP TBi (2)PHNG ILM CHLR q ru H2O
22): FSP TBi (2)PHNG ILM CHLR q H2O = FSP GARNET TBi (2)PHNG ILM CHLR q H2O																							22): FSP TBi (2)PHNG ILM CHLR q ru H2O = FSP TBi (2)PHNG ILM CHLR q H2O
23): FSP GARNET TBi (2)PHNG ILM CHLR q H2O = FSP GARNET TBi (2)PHNG ILM CHLR STAU q H2O																							23): FSP TBi PHNG ILM sill q ru H2O = (2)FSP TBi PHNG sill q ru H2O
24): FSP GARNET TBi (2)PHNG ILM CHLR STAU q H2O = FSP TBi (2)PHNG ILM CHLR STAU q H2O																							24): FSP TBi PHNG CHLR ab q ru H2O = FSP TBi (2)PHNG CHLR q ru H2O
25): FSP TBi PHNG CHLR ab q sph H2O = FSP TBi PHNG CHLR q ru sph H2O																							25): FSP TBi (2)PHNG CHLR q ru H2O = FSP TBi (2)PHNG ILM CHLR q ru H2O
26): FSP TBi PHNG CHLR q ru sph H2O = FSP TBi PHNG CHLR zo q ru H2O																							26): FSP TBi PHNG ILM sill q ru H2O = (2)FSP TBi PHNG ILM sill q ru H2O
27): FSP TBi PHNG CHLR zo q ru H2O = FSP TBi PHNG CHLR q ru H2O																							27): (2)FSP TBi PHNG ILM sill q ru H2O = (2)FSP TBi ILM sill q ru H2O
28): FSP GARNET TBi (2)PHNG ILM CHLR q H2O = FSP GARNET TBi (2)PHNG ILM STAU q H2O																							28): FSP TBi PHNG ILM STAU q H2O = FSP TBi PHNG ILM STAU ky q H2O
29): FSP GARNET TBi (2)PHNG ILM STAU q H2O = FSP GARNET TBi PHNG ILM STAU q H2O																							29): FSP TBi PHNG ILM STAU ky q H2O = FSP TBi PHNG ILM STAU sill q H2O
30): FSP GARNET TBi PHNG ILM STAU q H2O = FSP TBi PHNG ILM STAU q H2O																							30): TBi PHNG CHLR ab q ru sph H2O = TBi (2)PHNG CHLR ab q ru sph H2O
31): FSP TBi PHNG ILM STAU sill q H2O = FSP GARNET TBi PHNG ILM STAU sill q H2O																							31): TBi (2)PHNG ab q ru sph H2O = TBi (2)PHNG CHLR ab q ru sph H2O
32): FSP GARNET TBi PHNG ILM STAU sill q H2O = FSP GARNET TBi PHNG ILM sill q H2O																							32): TBi (2)PHNG ab q ru sph H2O = TBi (2)PHNG ab zo q ru H2O
33): FSP GARNET TBi PHNG ILM sill q H2O = FSP TBi PHNG ILM sill q H2O																							33): TBi (2)PHNG ab zo q ru H2O = FSP TBi (2)PHNG zo q ru H2O
34): TBi PHNG CHLR ab zo q sph H2O = TBi (2)PHNG CHLR ab zo q sph H2O																							34): FSP TBi (2)PHNG zo q ru H2O = FSP TBi (2)PHNG CHLR q ru H2O
35): TBi (2)PHNG CHLR ab zo q sph H2O = TBi (2)PHNG CHLR zo q sph H2O																							35): FSP TBi (2)PHNG ILM q H2O = FSP GARNET TBi (2)PHNG ILM q H2O
36): TBi (2)PHNG CHLR zo q sph H2O = TBi (2)PHNG zo q ru sph H2O																							36): FSP GARNET TBi (2)PHNG ILM q H2O = FSP GARNET TBi (2)PHNG ILM STAU q H2O
37): TBi (2)PHNG CHLR zo q sph H2O = TBi (2)PHNG zo q ru sph H2O																							37): FSP GARNET TBi (2)PHNG ILM STAU q H2O = FSP TBi (2)PHNG ILM STAU q H2O
38): TBi (2)PHNG zo q ru sph H2O = TBi (2)PHNG ab zo q ru H2O																							38): FSP TBi PHNG ILM STAU ky q H2O = FSP TBi PHNG ILM ky q H2O
39): TBi (2)PHNG ab zo q ru H2O = FSP TBi (2)PHNG zo q ru H2O																							39): FSP TBi PHNG ILM ky q H2O = FSP TBi PHNG ILM sill q H2O
40): FSP TBi (2)PHNG zo q ru H2O = FSP TBi (2)PHNG ILM zo q ru H2O																							40): FSP TBi (2)PHNG zo q ru H2O = FSP TBi (2)PHNG ILM zo q ru H2O
41): FSP TBi (2)PHNG ILM zo q ru H2O = FSP TBi PHNG ILM CHLR zo q ru H2O																							41): FSP TBi (2)PHNG ILM zo q ru H2O = FSP TBi (2)PHNG ILM CHLR q ru H2O
42): FSP TBi PHNG ILM CHLR zo q ru H2O = FSP TBi PHNG ILM CHLR q ru H2O																							42): FSP TBi (2)PHNG ILM CHLR q ru H2O = FSP TBi (2)PHNG ILM q ru H2O
43): FSP TBi (2)PHNG ILM CHLR q ru H2O = FSP TBi PHNG ILM CHLR q ru H2O																							43): FSP TBi (2)PHNG ILM q ru H2O = FSP TBi (2)PHNG ILM q H2O
44): FSP TBi (2)PHNG ILM CHLR q ru H2O = FSP TBi (2)PHNG ILM CHLR q H2O																							44): TBi (2)PHNG CHLR ab q ru sph H2O = TBi (2)PHNG CHLR q ru sph H2O
45): FSP GARNET TBi (2)PHNG ILM CHLR q H2O = FSP GARNET TBi (2)PHNG ILM q H2O																							45): TBi (2)PHNG CHLR q ru sph H2O = TBi (2)PHNG q ru sph H2O
46): FSP GARNET TBi (2)PHNG ILM q H2O = FSP GARNET TBi (2)PHNG ILM STAU q H2O																							46): TBi (2)PHNG q ru sph H2O = TBi (2)PHNG ab q ru sph H2O
47): FSP GARNET TBi PHNG ILM STAU q H2O = FSP GARNET TBi PHNG ILM STAU ky q H2O																							47): FSP TBi (2)PHNG ILM zo q ru H2O = FSP TBi (2)PHNG ILM zo q H2O
48): FSP GARNET TBi PHNG ILM STAU ky q H2O = FSP GARNET TBi PHNG ILM ky q H2O																							48): FSP TBi (2)PHNG ILM zo q H2O = FSP GARNET TBi (2)PHNG ILM zo q H2O
49): FSP GARNET TBi PHNG ILM ky q H2O = FSP GARNET TBi PHNG ILM sill q H2O																							49): FSP GARNET TBi (2)PHNG ILM zo q H2O = FSP GARNET TBi (2)PHNG ILM q H2O
50): FSP TBi (2)PHNG ILM zo q ru H2O = FSP TBi (2)PHNG ILM zo q H2O																							50): FSP GARNET TBi (2)PHNG ILM STAU q H2O = FSP GARNET TBi PHNG ILM STAU q H2O
51): FSP TBi (2)PHNG ILM zo q H2O = FSP GARNET TBi (2)PHNG ILM zo q H2O																							51): FSP GARNET TBi PHNG ILM STAU q H2O = FSP GARNET TBi PHNG ILM STAU ky q H2O
52): FSP GARNET TBi (2)PHNG ILM zo q H2O = FSP GARNET TBi (2)PHNG ILM CHLR q H2O																							52): FSP GARNET TBi PHNG ILM STAU ky q H2O = FSP GARNET TBi PHNG ILM ky q H2O
53): TBi (2)PHNG CHLR zo q sph H2O = TBi (2)PHNG CHLR zo q ru sph H2O																							53): FSP GARNET TBi PHNG ILM ky q H2O = FSP TBi PHNG ILM ky q H2O
54): TBi (2)PHNG CHLR zo q sph H2O = TBi (2)PHNG CHLR zo q ru sph H2O																							54): FSP TBi (2)PHNG zo q ru H2O = FSP GARNET TBi (2)PHNG zo q ru H2O
55): TBi (2)PHNG CHLR zo q sph H2O = TBi (2)PHNG CHLR zo q ru sph H2O																							55): FSP GARNET TBi (2)PHNG zo q ru H2O = FSP GARNET TBi (2)PHNG q ru H2O
56): TBi (2)PHNG CHLR zo q ru sph H2O = TBi (2)PHNG zo q ru sph H2O																							56): FSP GARNET TBi (2)PHNG q ru H2O = FSP GARNET TBi (2)PHNG ILM q ru H2O
57): TBi (2)PHNG CHLR zo q ru sph H2O = TBi (2)PHNG zo q ru sph H2O																							57): FSP GARNET TBi (2)PHNG q ru H2O = FSP GARNET TBi (2)PHNG ILM q ru H2O
58): TBi (2)PHNG CHLR zo q ru sph H2O = TBi (2)PHNG zo q ru sph H2O																							58): FSP GARNET TBi (2)PHNG ILM q ru H2O = FSP GARNET TBi (2)PHNG ILM q H2O
59): FSP GARNET TBi (2)PHNG ILM zo q ru H2O = FSP GARNET TBi (2)PHNG ILM zo q H2O																							59): FSP GARNET TBi (2)PHNG q ru H2O = FSP GARNET TBi PHNG q ru H2O
60): FSP GARNET TBi (2)PHNG ILM zo q ru H2O = FSP GARNET TBi (2)PHNG ILM q ru H2O																							60): FSP GARNET TBi PHNG q ru H2O = FSP GARNET TBi PHNG ky q ru H2O
61): FSP GARNET TBi (2)PHNG ILM q ru H2O = FSP GARNET TBi (2)PHNG ILM q H2O																							61): FSP GARNET TBi PHNG ky q ru H2O = FSP GARNET TBi PHNG ILM ky q ru H2O
62): FSP GARNET TBi (2)PHNG q ru H2O = FSP GARNET TBi (2)PHNG ILM q ru H2O																							62): FSP GARNET TBi PHNG ILM ky q ru H2O = FSP GARNET TBi PHNG ILM ky q H2O
63): FSP GARNET TBi (2)PHNG q ru H2O = FSP GARNET TBi PHNG q ru H2O																							63): TBi (2)PHNG CHLR q ru sph H2O = TBi (2)PHNG zo q ru sph H2O
64): FSP GARNET TBi PHNG q ru H2O = FSP GARNET TBi PHNG STAU q ru H2O																							64): TBi (2)PHNG zo q ru sph H2O = TBi (2)PHNG q ru sph H2O
65): FSP GARNET TBi PHNG STAU q ru H2O = FSP GARNET TBi PHNG STAU ky q ru H2O																							65): FSP GARNET TBi (2)PHNG q ru H2O = FSP GARNET TBi (2)PHNG q ru hem H2O
66): FSP GARNET TBi PHNG STAU ky q ru H2O = FSP GARNET TBi PHNG ky q ru H2O																							66): FSP TBi PHNG ILM STAU ky q H2O = FSP GARNET TBi PHNG ILM STAU ky q H2O
67): FSP GARNET TBi PHNG ky q ru H2O = FSP GARNET TBi PHNG ILM ky q ru H2O																							67): (2)FSP TBi PHNG sill q ru H2O = (2)FSP TBi PHNG ILM sill q ru H2O
68): FSP GARNET TBi PHNG ILM ky q ru H2O = FSP GARNET TBi PHNG ILM ky q H2O																							68): FSP GARNET TBi PHNG ILM sill q H2O = FSP TBi PHNG ILM sill q H2O
69): TBi (2)PHNG CHLR zo q sph H2O = TBi (2)PHNG CHLR zo q ru H2O																							69): FSP GARNET TBi PHNG ILM ky q H2O = FSP GARNET TBi PHNG ILM sill q H2O
70): TBi (2)PHNG CHLR zo q ru H2O = TBi (2)PHNG zo q ru H2O																							70): TBi PHNG CHLR ab q ru sph H2O = TBi PHNG CHLR ab zo q ru H2O
71): TBi (2)PHNG zo q ru H2O = TBi (2)PHNG ab zo q ru H2O																							71): TBi PHNG CHLR ab zo q ru H2O = FSP TBi PHNG CHLR ab q ru H2O
72): FSP TBi (2)PHNG ILM zo q ru H2O = FSP GARNET TBi (2)PHNG ILM zo q ru H2O																							72): TBi (2)PHNG CHLR ab zo q ru H2O = TBi PHNG CHLR ab zo q ru H2O
73): FSP GARNET TBi (2)PHNG zo q ru H2O = FSP GARNET TBi (2)PHNG ILM zo q ru H2O																							73): TBi (2)PHNG CHLR ab q ru sph H2O = TBi (2)PHNG CHLR ab zo q ru H2O
74): FSP GARNET TBi (2)PHNG zo q ru H2O = FSP GARNET TBi (2)PHNG q ru H2O																							74): FSP TBi PHNG ILM CHLR ab q ru H2O = FSP TBi (2)PHNG ILM CHLR q ru H2O
75): FSP GARNET TBi PHNG q ru H2O = FSP GARNET TBi PHNG ky q ru H2O																							75): FSP TBi (2)PHNG ILM STAU q H2O = FSP TBi (2)PHNG ILM STAU sill q H2O
76): (2)PHNG CHLR ab zo q sph H2O = PHNG CHLR ab zo q sph H2O																							76): FSP TBi (2)PHNG ILM STAU sill q H2O = FSP TBi PHNG ILM STAU sill q H2O
77): PHNG CHLR ab zo q sph H2O = TBi PHNG CHLR ab zo q sph H2O																							77): FSP GARNET TBi PHNG ILM STAU q H2O = FSP TBi PHNG ILM STAU q H2O
78): TBi (2)PHNG CHLR zo q sph H2O = TBi (2)PHNG CHLR zo q ru sph H2O																							78): FSP TBi (2)PHNG ILM zo q ru H2O = FSP TBi (2)PHNG ILM q ru H2O
79): TBi (2)PHNG CHLR zo q ru sph H2O = TBi (2)PHNG CHLR zo q ru H2O																							79): FSP GARNET TBi (2)PHNG q ru H2O = FSP GARNET TBi (2)PHNG STAU q ru H2O
80): TBi (2)PHNG CHLR zo q ru H2O = GARNET TBi (2)PHNG CHLR zo q ru H2O																							80): FSP GARNET TBi (2)PHNG STAU q ru H2O = FSP GARNET TBi PHNG STAU q ru H2O
81): GARNET TBi (2)PHNG CHLR zo q ru H2O = GARNET TBi (2)PHNG zo q ru H2O																							81): FSP GARNET TBi PHNG STAU q ru H2O = FSP GARNET TBi PHNG STAU ky q ru H2O
82): GARNET TBi (2)PHNG zo q ru H2O = GARNET TBi (2)PHNG ab zo q ru H2O																							82): FSP GARNET TBi PHNG STAU ky q ru H2O = FSP GARNET TBi PHNG ky q ru H2O
83): GARNET TBi (2)PHNG ab zo q ru H2O = FSP GARNET TBi (2)PHNG zo q ru H2O																							83): FSP GARNET TBi PHNG ILM STAU q ru H2O = FSP GARNET TBi PHNG ILM STAU q H2O
84): TBi (2)PHNG CHLR ab zo q sph H2O = (2)PHNG CHLR ab zo q sph H2O																							84): FSP GARNET TBi (2)PHNG STAU q ru H2O = FSP GARNET TBi PHNG ILM STAU q ru H2O
85): FSP TBi PHNG CHLR ab q sph H2O = FSP TBi PHNG CHLR q ru sph H2O																							85): FSP TBi (2)PHNG ILM zo q ru H2O = FSP GARNET TBi (2)PHNG ILM zo q ru H2O
86): TBi (2)PHNG zo q ru H2O = TBi (2)PHNG zo q ru sph H2O																							86): FSP GARNET TBi (2)PHNG ILM zo q ru H2O = FSP GARNET TBi (2)PHNG zo q ru H2O
87): FSP TBi (2)PHNG ILM zo q H2O = FSP TBi (2)PHNG ILM CHLR q H2O																							87): FSP TBi PHNG CHLR ab q ru H2O = FSP TBi (2)PHNG CHLR ab q ru H2O
88): FSP GARNET TBi PHNG ILM STAU q H2O = FSP GARNET TBi PHNG ILM STAU q ru H2O																							88): FSP TBi (2)PHNG CHLR ab q ru H2O = FSP TBi PHNG CHLR ab q ru H2O
89): FSP GARNET TBi PHNG ILM q ru H2O = FSP GARNET TBi PHNG ILM STAU q ru H2O																							89): FSP TBi (2)PHNG CHLR ab q ru H2O = FSP TBi (2)PHNG CHLR q ru H2O
90): FSP GARNET TBi PHNG ILM q ru H2O = FSP GARNET TBi (2)PHNG ILM q ru H2O																							90): FSP TBi (2)PHNG CHLR q ru H2O = FSP TBi (2)PHNG CHLR ab q ru H2O
91): FSP GARNET TBi PHNG ILM sill q H2O = FSP GARNET TBi PHNG ILM sill q ru H2O																							91): FSP TBi (2)PHNG ILM STAU sill q H2O = FSP TBi (2)PHNG ILM sill q H2O
92): FSP GARNET TBi PHNG sill q ru H2O = FSP GARNET TBi PHNG ILM sill q ru H2O																							92): FSP TBi (2)PHNG ILM sill q H2O = FSP TBi PHNG ILM sill q H2O
93): FSP GARNET TBi PHNG sill q ru H2O = FSP GARNET TBi PHNG ky q ru H2O																							93): TBi (2)PHNG CHLR ab zo q ru H2O = TBi (2)PHNG ab zo q ru H2O
94): TBi PHNG CHLR ab zo q sph H2O = TBi PHNG CHLR ab zo q ru H2O																							94): FSP TBi (2)PHNG zo q ru H2O = FSP TBi (2)PHNG CHLR zo q ru H2O
95): TBi PHNG CHLR ab zo q ru H2O = FSP TBi PHNG CHLR zo q ru H2O																							95): FSP TBi (2)PHNG CHLR zo q ru H2O = FSP TBi (2)PHNG CHLR q ru H2O
96): FSP TBi PHNG ILM CHLR STAU q H2O = FSP TBi (2)PHNG ILM CHLR STAU q H2O																							96): FSP TBi (2)PHNG ILM zo q H2O = FSP TBi (2)PHNG ILM q H2O
97): FSP TBi PHNG ILM STAU q H2O = FSP TBi PHNG ILM STAU ky q H2O																							97): FSP GARNET TBi (2)PHNG ILM q ru H2O = FSP GARNET TBi PHNG ILM STAU q ru H2O
98): FSP TBi PHNG ILM STAU ky q H2O = FSP GARNET TBi PHNG ILM STAU ky q H2O																							98): FSP TBi (2)PHNG ILM zo q ru H2O = FSP GARNET TBi (2)PHNG ILM q ru H2O
99): FSP GARNET TBi PHNG ILM STAU ky q H2O = FSP GARNET TBi PHNG ILM STAU sill q H2O																							99): FSP TBi (2)PHNG ILM zo q ru H2O = FSP GARNET TBi (2)PHNG ILM q ru H2O
100): FSP TBi (2)PHNG ILM CHLR q H2O = FSP TBi (2)PHNG ILM CHLR STAU q H2O																							100): FSP TBi (2)PHNG ILM zo q ru H2O = FSP GARNET TBi (2)PHNG ILM q ru H2O
101): FSP GARNET TBi (2)PHNG ILM CHLR STAU q H2O = FSP GARNET TBi (2)PHNG ILM STAU q H2O																							101): FSP GARNET TBi (2)PHNG q ru H2O = FSP GARNET TBi (2)PHNG ky q ru H2O
102): FSP GARNET TBi (2)PHNG ILM STAU q H2O = FSP TBi (2)PHNG ILM STAU q H2O																							102): FSP GARNET TBi (2)PHNG ky q ru H2O = FSP GARNET TBi PHNG ky q ru H2O
103): TBi (2)PHNG CHLR zo q sph H2O = TBi (2)PHNG CHLR zo q ru sph H2O																							103): FSP TBi (2)PHNG CHLR q ru H2O = FSP TBi PHNG CHLR ab q ru H2O
104): TBi (2)PHNG CHLR zo q ru sph H2O = TBi (2)PHNG zo q ru sph H2O																							104): FSP TBi (2)PHNG ILM STAU and q H2O = FSP TBi (2)PHNG ILM STAU sill q H2O
105): GARNET TBi (2)PHNG ab zo q ru H2O = TBi (2)PHNG ab zo q ru H2O																							105): FSP TBi PHNG ILM STAU ky q H2O = FSP TBi PHNG ILM sill q H2O
106): GARNET TBi (2)PHNG zo q ru H2O = TBi (2)PHNG zo q ru H2O																							106): FSP TBi (2)PHNG zo q ru H2O = FSP TBi (2)PHNG CHLR zo q ru H2O
107): FSP TBi (2)PHNG ILM zo q H2O = FSP TBi (2)PHNG ILM CHLR zo q H2O																							107): FSP TBi (2)PHNG zo q ru H2O = FSP TBi (2)PHNG CHLR zo q ru H2O
108): FSP TBi (2)PHNG ILM CHLR zo q H2O = FSP TBi (2)PHNG ILM CHLR q H2O																							108): FSP TBi (2)PHNG CHLR zo q ru H2O = FSP TBi (2)PHNG CHLR q ru H2O
109): FSP GARNET TBi (2)PHNG ILM zo q H2O = FSP GARNET TBi (2)PHNG ILM q H2O																							109): FSP TBi (2)PHNG CHLR zo q ru H2O = FSP TBi (2)PHNG CHLR q ru H2O
110): FSP GARNET TBi PHNG STAU q ru H2O = FSP GARNET TBi PHNG ILM STAU q ru H2O																							110): FSP TBi (2)PHNG zo q ru H2O = FSP TBi (2)PHNG CHLR q ru H2O
111): FSP TBi (2)PHNG CHLR zo q ru H2O = FSP TBi PHNG CHLR zo q ru H2O																							111): FSP GARNET TBi (2)PHNG ILM q ru H2O = FSP GARNET TBi (2)PHNG ILM STAU q H2O
112): FSP TBi PHNG CHLR zo q ru H2O = FSP TBi (2)PHNG CHLR zo q ru H2O																							112): FSP GARNET TBi PHNG ILM STAU q ru H2O = FSP GARNET TBi PHNG STAU q ru H2O
113): FSP TBi (2)PHNG CHLR zo q ru H2O = FSP TBi (2)PHNG zo q ru H2O																							113): FSP GARNET TBi (2)PHNG ILM zo q ru H2O = FSP GARNET TBi (2)PHNG ILM q ru H2O
114): FSP TBi PHNG ILM STAU ky q H2O = FSP TBi PHNG ILM STAU sill q H2O																							114): FSP TBi PHNG ILM CHLR ab q ru H2O = FSP TBi (2)PHNG CHLR q ru H2O
115): FSP TBi (2)PHNG ILM CHLR zo q H2O = FSP TBi (2)PHNG ILM CHLR q ru H2O																							115): FSP GARNET TBi (2)PHNG ILM zo q H2O = FSP GARNET TBi (2)PHNG ILM q ru H2O
116): FSP TBi (2)PHNG ILM CHLR q ru H2O = FSP TBi (2)PHNG ILM zo q ru H2O																							116): FSP GARNET TBi PHNG ILM STAU q ru H2O = FSP GARNET TBi PHNG ILM STAU ky q H2O
117): FSP GARNET TBi PHNG ILM STAU q ru H2O = FSP GARNET TBi PHNG ILM STAU ky q H2O																							117): FSP TBi (2)PHNG ILM zo q ru H2O = FSP GARNET TBi (2)PHNG ILM zo q ru H2O
118): TBi (2)PHNG CHLR zo q sph H2O = TBi (2)PHNG zo q ru sph H2O																							118): FSP GARNET TBi (2)PHNG ILM zo q ru H2O = FSP GARNET TBi (2)PHNG ILM q ru H2O
119): FSP GARNET TBi PHNG ILM q ru H2O = FSP GARNET TBi PHNG q ru H2O																							119): FSP TBi (2)PHNG ILM sill q H2O = FSP TBi (2)PHNG ILM and q H2O
120): FSP TBi PHNG CHLR zo q ru H2O = FSP TBi PHNG ILM CHLR zo q ru H2O																							120): FSP TBi (2)PHNG ILM STAU q H2O = FSP TBi PHNG ILM STAU sill q H2O
121): FSP GARNET TBi (2)PHNG ILM zo q H2O = FSP TBi (2)PHNG ILM CHLR zo q H2O																							121): (2)FSP TBi ILM sill q ru H2O = (2)FSP TBi ILM sill q ru hem H2O
122): FSP TBi (2)PHNG ILM CHLR zo q H2O = FSP TBi (2)PHNG ILM CHLR q H2O																							122): FSP TBi (2)PHNG zo q ru H2O = FSP TBi (2)PHNG CHLR q ru H2O
123): FSP GARNET TBi (2)PHNG ILM zo q H2O = FSP TBi (2)PHNG ILM CHLR q H2O																							123): FSP TBi (2)PHNG ILM zo q ru H2O = FSP GARNET TBi (2)PHNG zo q ru H2O
124): FSP GARNET TBi (2)PHNG ILM q ru H2O = FSP GARNET TBi (2)PHNG ILM STAU q ru H2O																							124): FSP GARNET TBi PHNG STAU ky q ru H2O = FSP GARNET TBi PHNG ILM ky q ru H2O
125): FSP GARNET TBi (2)PHNG ILM STAU q ru H2O = FSP GARNET TBi PHNG ILM STAU q ru H2O																							125): FSP GARNET TBi (2)PHNG q ru H2O = FSP GARNET TBi PHNG ky q ru H2O
126): TBi PHNG CHLR ab zo q ru H2O = TBi (2)PHNG CHLR ab zo q ru H2O																							126): FSP TBi (2)PHNG zo q ru H2O = FSP TBi (2)PHNG CHLR q ru H2O
127): TBi (2)PHNG CHLR ab zo q ru H2O = TBi (2)PHNG ab zo q ru H2O																							127): FSP TBi PHNG CHLR ab q ru H2O = FSP TBi (2)PHNG CHLR ab q ru H2O
128): FSP TBi (2)PHNG zo q ru H2O = FSP GARNET TBi (2)PHNG zo q ru H2O																							128): FSP TBi (2)PHNG CHLR ab q ru H2O = FSP TBi (2)PHNG CHLR q ru H2O
129): FSP GARNET TBi PHNG ILM ky q ru H2O = FSP GARNET TBi PHNG ILM sill q ru H2O																							129): TBi PHNG CHLR ab zo q ru H2O = TBi (2)PHNG ab zo q ru H2O
130): FSP TBi (2)PHNG ILM CHLR q ru H2O = FSP TBi (2)PHNG ILM zo q H2O																							130): FSP TBi (2)PHNG zo q ru H2O = FSP TBi (2)PHNG CHLR zo q ru H2O
131): FSP GARNET TBi PHNG STAU q ru H2O = FSP GARNET TBi PHNG ky q ru H2O																							131): FSP TBi (2)PHNG CHLR zo q ru H2O = FSP TBi (2)PHNG CHLR q ru H2O
132): FSP TBi PHNG ILM STAU sill q H2O = FSP TBi PHNG ILM STAU and q H2O																							132): FSP TBi (2)PHNG zo q ru H2O = FSP TBi (2)PHNG ILM CHLR q ru H2O
133): TBi PHNG CHLR ab zo q sph H2O = TBi PHNG CHLR ab zo q ru sph H2O																							133): FSP GARNET TBi (2)PHNG ILM q ru H2O = FSP GARNET TBi (2)PHNG ILM STAU q ru H2O
134): TBi PHNG CHLR ab zo q ru sph H2O = TBi PHNG CHLR ab zo q ru H2O																							134): FSP GARNET TBi (2)PHNG ILM STAU q ru H2O = FSP GARNET TBi PHNG ILM STAU q H2O
135): FSP TBi (2)PHNG ILM zo q ru H2O = FSP TBi (2)PHNG CHLR zo q ru H2O																							135): FSP GARNET TBi PHNG ILM STAU q ru H2O = FSP GARNET TBi PHNG ILM ky q ru H2O
136): FSP TBi (2)PHNG ILM zo q ru H2O = FSP TBi PHNG ILM CHLR q ru H2O																							136): FSP TBi PHNG CHLR ab q ru H2O = FSP TBi (2)PHNG CHLR q ru H2O
137): FSP GARNET TBi PHNG ILM ky q ru H2O = FSP GARNET TBi PHNG ILM sill q H2O																							137): FSP TBi (2)PHNG ILM zo q ru H2O = FSP GARNET TBi (2)PHNG ILM zo q ru H2O
138): FSP TBi (2)PHNG ILM zo q H2O = FSP TBi (2)PHNG ILM CHLR zo q H2O																							138): FSP GARNET TBi (2)PHNG ILM zo q ru H2O = FSP GARNET TBi (2)PHNG ILM q ru H2O
139): FSP TBi (2)PHNG ILM CHLR zo q H2O = FSP TBi (2)PHNG ILM CHLR q H2O
140): TBi (2)PHNG CHLR zo q sph H2O = TBi (2)PHNG zo q ru sph H2O
141): FSP TBi PHNG ILM CHLR q ru H2O = FSP TBi (2)PHNG ILM CHLR q H2O
142): TBi PHNG CHLR ab zo q sph H2O = FSP TBi PHNG CHLR zo q ru H2O
143): FSP TBi PHNG ILM STAU sill q H2O = FSP GARNET TBi PHNG ILM sill q H2O
144): FSP GARNET TBi (2)PHNG ILM STAU q ru H2O = FSP GARNET TBi (2)PHNG ILM STAU q H2O
145): TBi (2)PHNG CHLR zo q sph H2O = TBi (2)PHNG ab zo q ru H2O
146): FSP TBi (2)PHNG ILM zo q ru H2O = FSP TBi PHNG CHLR zo q ru H2O
147): FSP TBi (2)PHNG ILM CHLR zo q ru H2O = FSP TBi PHNG ILM CHLR zo q ru H2O
148): FSP TBi (2)PHNG ILM zo q ru H2O = FSP TBi (2)PHNG ILM CHLR zo q ru H2O
149): FSP GARNET TBi PHNG ILM STAU q ru H2O = FSP GARNET TBi PHNG ILM ky q ru H2O
150): FSP GARNET TBi (2)PHNG ILM zo q ru H2O = FSP TBi (2)PHNG ILM zo q H2O
151): FSP TBi (2)PHNG ILM CHLR q H2O = FSP TBi (2)PHNG ILM zo q H2O
152): TBi (2)PHNG CHLR zo q ru H2O = GARNET TBi (2)PHNG zo q ru H2O
153): FSP TBi (2)PHNG ILM zo q H2O = FSP TBi (2)PHNG ILM CHLR zo q H2O
154): FSP TBi (2)PHNG ILM CHLR zo q H2O = FSP TBi (2)PHNG ILM CHLR q H2O
155): FSP TBi (2)PHNG ILM zo q H2O = FSP TBi (2)PHNG ILM CHLR q H2O
156): FSP TBi PHNG ILM CHLR STAU q H2O = FSP TBi (2)PHNG ILM STAU q H2O
157): TBi PHNG CHLR ab zo q sph H2O = FSP TBi PHNG CHLR q ru sph H2O
158): FSP GARNET TBi (2)PHNG ILM CHLR q H2O = FSP TBi (2)PHNG ILM CHLR STAU q H2O
159): FSP GARNET TBi (2)PHNG ILM zo q H2O = FSP TBi (2)PHNG ILM CHLR q H2O
160): FSP GARNET TBi PHNG ILM STAU ky q H2O = FSP GARNET TBi PHNG ILM sill q H2O
161): TBi PHNG CHLR ab zo q sph H2O = TBi PHNG CHLR ab zo q ru H2O
162): TBi (2)PHNG CHLR zo q ru sph H2O = TBi (2)PHNG zo q ru sph H2O
163): TBi (2)PHNG CHLR zo q sph H2O = TBi (2)PHNG CHLR zo q ru sph H2O
164): FSP TBi (2)PHNG ILM zo q ru H2O = FSP TBi (2)PHNG CHLR zo q ru H2O
165): FSP TBi (2)PHNG ILM zo q ru H2O = FSP TBi PHNG CHLR zo q ru H2O
166): FSP TBi (2)PHNG ILM zo q ru H2O = FSP TBi PHNG ILM CHLR zo q ru H2O
167): FSP GARNET TBi (2)PHNG ILM q ru H2O = FSP GARNET TBi (2)PHNG ILM STAU q H2O
168): FSP TBi (2)PHNG ILM CHLR q H2O = FSP TBi (2)PHNG ILM zo q H2O
169): FSP TBi (2)PHNG ILM CHLR zo q H2O = FSP TBi (2)PHNG ILM CHLR q H2O
170): FSP TBi (2)PHNG ILM zo q H2O = FSP TBi (2)PHNG ILM CHLR zo q H2O
171): TBi (2)PHNG CHLR zo q sph H2O = TBi (2)PHNG zo q ru sph H2O
172): FSP GARNET TBi PHNG STAU ky q ru H2O = FSP GARNET TBi PHNG ILM ky q ru H2O
173): FSP GARNET TBi PHNG ky q ru H2O = FSP GARNET TBi PHNG ILM sill q ru H2O
174): FSP TBi (2)PHNG ILM zo q H2O = FSP TBi (2)PHNG ILM CHLR zo q H2O
175): FSP TBi (2)PHNG ILM CHLR zo q H2O = FSP TBi (2)PHNG ILM CHLR q H2O
176): FSP TBi (2)PHNG ILM zo q H2O = FSP TBi (2)PHNG ILM CHLR q H2O

## Sheet: B-5_8-d
Path B 5_8 diffused composition, core																							Path B 5_8 diffused composition, rim
Core model reactions																							Rim model reactions
1): FSP TBi PHNG CHLR ab q sph H2O = FSP TBi PHNG CHLR ab q ru H2O																							1): TBi PHNG CHLR ab q ru sph H2O = FSP TBi PHNG CHLR ab q ru H2O
2): FSP TBi PHNG CHLR ab q ru H2O = FSP TBi PHNG CHLR q ru H2O																							2): FSP TBi PHNG CHLR ab q ru H2O = FSP TBi PHNG ILM CHLR ab q ru H2O
3): FSP TBi PHNG CHLR q ru H2O = FSP TBi PHNG ILM CHLR q ru H2O																							3): FSP TBi PHNG ILM CHLR ab q ru H2O = FSP TBi PHNG ILM CHLR q ru H2O
4): FSP TBi PHNG ILM CHLR q ru H2O = FSP TBi PHNG ILM CHLR q H2O																							4): FSP TBi PHNG ILM CHLR q ru H2O = FSP TBi PHNG ILM CHLR q H2O
5): FSP TBi PHNG ILM CHLR q H2O = FSP TBi PHNG ILM CHLR STAU q H2O																							5): FSP TBi PHNG ILM CHLR q H2O = FSP TBi (2)PHNG ILM CHLR q H2O
6): FSP TBi PHNG ILM CHLR STAU q H2O = FSP TBi PHNG ILM STAU q H2O																							6): FSP TBi (2)PHNG ILM CHLR q H2O = FSP TBi (2)PHNG ILM q H2O
7): FSP TBi PHNG ILM STAU q H2O = FSP TBi PHNG ILM STAU and q H2O																							7): FSP TBi (2)PHNG ILM q H2O = FSP TBi (2)PHNG ILM STAU q H2O
8): FSP TBi PHNG ILM STAU and q H2O = FSP TBi PHNG ILM and q H2O																							8): FSP TBi (2)PHNG ILM STAU q H2O = FSP TBi (2)PHNG ILM STAU and q H2O
9): FSP TBi PHNG ILM and q H2O = FSP TBi PHNG ILM sill q H2O																							9): FSP TBi (2)PHNG ILM STAU and q H2O = FSP TBi (2)PHNG ILM and q H2O
10): FSP TBi PHNG ILM sill q H2O = (2)FSP TBi PHNG ILM sill q H2O																							10): FSP TBi (2)PHNG ILM and q H2O = FSP TBi PHNG ILM and q H2O
11): (2)FSP TBi PHNG ILM sill q H2O = (2)FSP TBi ILM sill q H2O																							11): FSP TBi PHNG ILM and q H2O = FSP TBi PHNG ILM sill q H2O
12): TBi PHNG CHLR ab zo q sph H2O = FSP TBi PHNG CHLR ab q sph H2O																							12): FSP TBi PHNG ILM sill q H2O = FSP TBi PHNG ILM sill q ru H2O
13): FSP TBi PHNG ILM STAU q H2O = FSP TBi PHNG ILM STAU sill q H2O																							13): FSP TBi PHNG ILM sill q ru H2O = FSP TBi PHNG sill q ru H2O
14): FSP TBi PHNG ILM STAU sill q H2O = FSP TBi PHNG ILM sill q H2O																							14): FSP TBi PHNG sill q ru H2O = (2)FSP TBi PHNG sill q ru H2O
15): FSP TBi PHNG ILM CHLR q H2O = FSP TBi (2)PHNG ILM CHLR STAU q H2O																							15): (2)FSP TBi PHNG sill q ru H2O = (2)FSP TBi sill q ru H2O
16): FSP TBi (2)PHNG ILM CHLR STAU q H2O = FSP TBi (2)PHNG ILM STAU q H2O																							16): (2)FSP TBi sill q ru H2O = (2)FSP TBi ILM sill q ru H2O
17): FSP TBi (2)PHNG ILM STAU q H2O = FSP TBi PHNG ILM STAU q H2O																							17): (2)FSP TBi ILM sill q ru H2O = (2)FSP TBi ILM sill q H2O
18): FSP TBi PHNG CHLR ab q sph H2O = FSP TBi PHNG CHLR ab q ru sph H2O																							18): (2)FSP TBi ILM sill q H2O = (2)FSP TBi ILM CORD sill q H2O
19): FSP TBi PHNG CHLR ab q ru sph H2O = FSP TBi PHNG CHLR q ru sph H2O																							19): (2)FSP TBi ILM CORD sill q H2O = (2)FSP TBi ILM CORD q H2O
20): FSP TBi PHNG CHLR q ru sph H2O = FSP TBi PHNG CHLR q ru H2O																							20): FSP TBi (2)PHNG ILM STAU q H2O = FSP TBi PHNG ILM STAU q H2O
21): FSP TBi PHNG ILM CHLR q H2O = FSP TBi (2)PHNG ILM CHLR q H2O																							21): FSP TBi PHNG ILM STAU q H2O = FSP TBi PHNG ILM STAU sill q H2O
22): FSP TBi (2)PHNG ILM CHLR q H2O = FSP GARNET TBi (2)PHNG ILM CHLR q H2O																							22): FSP TBi PHNG ILM STAU sill q H2O = FSP TBi PHNG ILM sill q H2O
23): FSP GARNET TBi (2)PHNG ILM CHLR q H2O = FSP GARNET TBi (2)PHNG ILM CHLR STAU q H2O																							23): FSP TBi (2)PHNG ILM CHLR q ru H2O = FSP TBi PHNG ILM CHLR q ru H2O
24): FSP GARNET TBi (2)PHNG ILM CHLR STAU q H2O = FSP TBi (2)PHNG ILM CHLR STAU q H2O																							24): FSP TBi (2)PHNG ILM CHLR q ru H2O = FSP TBi (2)PHNG ILM CHLR q H2O
25): FSP TBi PHNG CHLR ab q sph H2O = FSP TBi PHNG CHLR q ru sph H2O																							25): FSP TBi (2)PHNG CHLR ab q ru H2O = FSP TBi PHNG CHLR ab q ru H2O
26): FSP TBi PHNG CHLR q ru sph H2O = FSP TBi PHNG CHLR zo q ru H2O																							26): FSP TBi (2)PHNG CHLR ab q ru H2O = FSP TBi (2)PHNG CHLR q ru H2O
27): FSP TBi PHNG CHLR zo q ru H2O = FSP TBi PHNG CHLR q ru H2O																							27): FSP TBi (2)PHNG CHLR q ru H2O = FSP TBi (2)PHNG ILM CHLR q ru H2O
28): FSP GARNET TBi (2)PHNG ILM CHLR q H2O = FSP GARNET TBi (2)PHNG ILM STAU q H2O																							28): FSP TBi PHNG ILM sill q ru H2O = (2)FSP TBi PHNG ILM sill q ru H2O
29): FSP GARNET TBi (2)PHNG ILM STAU q H2O = FSP GARNET TBi PHNG ILM STAU q H2O																							29): (2)FSP TBi PHNG ILM sill q ru H2O = (2)FSP TBi ILM sill q ru H2O
30): FSP GARNET TBi PHNG ILM STAU q H2O = FSP TBi PHNG ILM STAU q H2O																							30): FSP TBi PHNG CHLR ab q ru H2O = FSP TBi (2)PHNG CHLR q ru H2O
31): FSP TBi PHNG ILM STAU sill q H2O = FSP GARNET TBi PHNG ILM STAU sill q H2O																							31): FSP TBi PHNG ILM STAU q H2O = FSP TBi PHNG ILM STAU ky q H2O
32): FSP GARNET TBi PHNG ILM STAU sill q H2O = FSP GARNET TBi PHNG ILM sill q H2O																							32): FSP TBi PHNG ILM STAU ky q H2O = FSP TBi PHNG ILM STAU sill q H2O
33): FSP GARNET TBi PHNG ILM sill q H2O = FSP TBi PHNG ILM sill q H2O																							33): TBi PHNG CHLR ab q ru sph H2O = TBi (2)PHNG CHLR ab q ru sph H2O
34): TBi PHNG CHLR ab zo q sph H2O = TBi (2)PHNG CHLR ab zo q sph H2O																							34): TBi (2)PHNG ab q ru sph H2O = TBi (2)PHNG CHLR ab q ru sph H2O
35): TBi (2)PHNG CHLR ab zo q sph H2O = TBi (2)PHNG CHLR zo q sph H2O																							35): TBi (2)PHNG ab q ru sph H2O = TBi (2)PHNG ab zo q ru H2O
36): TBi (2)PHNG CHLR zo q sph H2O = TBi (2)PHNG zo q ru sph H2O																							36): TBi (2)PHNG ab zo q ru H2O = FSP TBi (2)PHNG zo q ru H2O
37): TBi (2)PHNG CHLR zo q sph H2O = TBi (2)PHNG zo q ru sph H2O																							37): FSP TBi (2)PHNG zo q ru H2O = FSP TBi (2)PHNG CHLR q ru H2O
38): TBi (2)PHNG zo q ru sph H2O = TBi (2)PHNG ab zo q ru H2O																							38): FSP TBi (2)PHNG ILM q H2O = FSP GARNET TBi (2)PHNG ILM q H2O
39): TBi (2)PHNG ab zo q ru H2O = FSP TBi (2)PHNG zo q ru H2O																							39): FSP GARNET TBi (2)PHNG ILM q H2O = FSP GARNET TBi (2)PHNG ILM STAU q H2O
40): FSP TBi (2)PHNG zo q ru H2O = FSP TBi (2)PHNG ILM zo q ru H2O																							40): FSP GARNET TBi (2)PHNG ILM STAU q H2O = FSP TBi (2)PHNG ILM STAU q H2O
41): FSP TBi (2)PHNG ILM zo q ru H2O = FSP TBi PHNG ILM CHLR zo q ru H2O																							41): FSP TBi PHNG ILM STAU ky q H2O = FSP TBi PHNG ILM ky q H2O
42): FSP TBi PHNG ILM CHLR zo q ru H2O = FSP TBi PHNG ILM CHLR q ru H2O																							42): FSP TBi PHNG ILM ky q H2O = FSP TBi PHNG ILM sill q H2O
43): FSP TBi (2)PHNG ILM CHLR q ru H2O = FSP TBi PHNG ILM CHLR q ru H2O																							43): FSP TBi (2)PHNG zo q ru H2O = FSP TBi (2)PHNG ILM zo q ru H2O
44): FSP TBi (2)PHNG ILM CHLR q ru H2O = FSP TBi (2)PHNG ILM CHLR q H2O																							44): FSP TBi (2)PHNG ILM zo q ru H2O = FSP TBi (2)PHNG ILM CHLR q ru H2O
45): FSP GARNET TBi (2)PHNG ILM CHLR q H2O = FSP GARNET TBi (2)PHNG ILM q H2O																							45): FSP TBi (2)PHNG ILM CHLR q ru H2O = FSP TBi (2)PHNG ILM q ru H2O
46): FSP GARNET TBi (2)PHNG ILM q H2O = FSP GARNET TBi (2)PHNG ILM STAU q H2O																							46): FSP TBi (2)PHNG ILM q ru H2O = FSP TBi (2)PHNG ILM q H2O
47): FSP GARNET TBi PHNG ILM STAU q H2O = FSP GARNET TBi PHNG ILM STAU ky q H2O																							47): FSP GARNET TBi PHNG ILM STAU ky q H2O = FSP TBi PHNG ILM STAU ky q H2O
48): FSP GARNET TBi PHNG ILM STAU ky q H2O = FSP GARNET TBi PHNG ILM ky q H2O																							48): FSP GARNET TBi PHNG ILM STAU ky q H2O = FSP GARNET TBi PHNG ILM ky q H2O
49): FSP GARNET TBi PHNG ILM ky q H2O = FSP GARNET TBi PHNG ILM sill q H2O																							49): FSP GARNET TBi PHNG ILM ky q H2O = FSP TBi PHNG ILM ky q H2O
50): FSP TBi (2)PHNG ILM zo q ru H2O = FSP TBi (2)PHNG ILM zo q H2O																							50): TBi (2)PHNG CHLR ab q ru sph H2O = TBi (2)PHNG CHLR q ru sph H2O
51): FSP TBi (2)PHNG ILM zo q H2O = FSP GARNET TBi (2)PHNG ILM zo q H2O																							51): TBi (2)PHNG CHLR q ru sph H2O = TBi (2)PHNG q ru sph H2O
52): FSP GARNET TBi (2)PHNG ILM zo q H2O = FSP GARNET TBi (2)PHNG ILM CHLR q H2O																							52): TBi (2)PHNG q ru sph H2O = TBi (2)PHNG ab q ru sph H2O
53): TBi (2)PHNG CHLR zo q sph H2O = TBi (2)PHNG CHLR zo q ru sph H2O																							53): FSP TBi (2)PHNG ILM zo q ru H2O = FSP TBi (2)PHNG ILM zo q H2O
54): TBi (2)PHNG CHLR zo q sph H2O = TBi (2)PHNG CHLR zo q ru sph H2O																							54): FSP TBi (2)PHNG ILM zo q H2O = FSP GARNET TBi (2)PHNG ILM zo q H2O
55): TBi (2)PHNG CHLR zo q sph H2O = TBi (2)PHNG CHLR zo q ru sph H2O																							55): FSP GARNET TBi (2)PHNG ILM zo q H2O = FSP GARNET TBi (2)PHNG ILM q H2O
56): TBi (2)PHNG CHLR zo q ru sph H2O = TBi (2)PHNG zo q ru sph H2O																							56): FSP GARNET TBi (2)PHNG ILM STAU q H2O = FSP GARNET TBi PHNG ILM STAU q H2O
57): TBi (2)PHNG CHLR zo q ru sph H2O = TBi (2)PHNG zo q ru sph H2O																							57): FSP GARNET TBi PHNG ILM STAU q H2O = FSP GARNET TBi PHNG ILM STAU ky q H2O
58): TBi (2)PHNG CHLR zo q ru sph H2O = TBi (2)PHNG zo q ru sph H2O																							58): FSP TBi (2)PHNG zo q ru H2O = FSP GARNET TBi (2)PHNG zo q ru H2O
59): FSP GARNET TBi (2)PHNG ILM zo q ru H2O = FSP GARNET TBi (2)PHNG ILM zo q H2O																							59): FSP GARNET TBi (2)PHNG zo q ru H2O = FSP GARNET TBi (2)PHNG q ru H2O
60): FSP GARNET TBi (2)PHNG ILM zo q ru H2O = FSP GARNET TBi (2)PHNG ILM q ru H2O																							60): FSP GARNET TBi (2)PHNG q ru H2O = FSP GARNET TBi (2)PHNG ILM q ru H2O
61): FSP GARNET TBi (2)PHNG ILM q ru H2O = FSP GARNET TBi (2)PHNG ILM q H2O																							61): FSP GARNET TBi (2)PHNG q ru H2O = FSP GARNET TBi (2)PHNG ILM q ru H2O
62): FSP GARNET TBi (2)PHNG q ru H2O = FSP GARNET TBi (2)PHNG ILM q ru H2O																							62): FSP GARNET TBi (2)PHNG ILM q ru H2O = FSP GARNET TBi (2)PHNG ILM q H2O
63): FSP GARNET TBi (2)PHNG q ru H2O = FSP GARNET TBi PHNG q ru H2O																							63): FSP GARNET TBi (2)PHNG q ru H2O = FSP GARNET TBi PHNG q ru H2O
64): FSP GARNET TBi PHNG q ru H2O = FSP GARNET TBi PHNG STAU q ru H2O																							64): FSP GARNET TBi PHNG q ru H2O = FSP GARNET TBi PHNG ky q ru H2O
65): FSP GARNET TBi PHNG STAU q ru H2O = FSP GARNET TBi PHNG STAU ky q ru H2O																							65): FSP GARNET TBi PHNG ky q ru H2O = FSP GARNET TBi PHNG ILM ky q ru H2O
66): FSP GARNET TBi PHNG STAU ky q ru H2O = FSP GARNET TBi PHNG ky q ru H2O																							66): FSP GARNET TBi PHNG ILM ky q ru H2O = FSP GARNET TBi PHNG ILM ky q H2O
67): FSP GARNET TBi PHNG ky q ru H2O = FSP GARNET TBi PHNG ILM ky q ru H2O																							67): TBi (2)PHNG CHLR q ru sph H2O = TBi (2)PHNG zo q ru sph H2O
68): FSP GARNET TBi PHNG ILM ky q ru H2O = FSP GARNET TBi PHNG ILM ky q H2O																							68): TBi (2)PHNG zo q ru sph H2O = TBi (2)PHNG q ru sph H2O
69): TBi (2)PHNG CHLR zo q sph H2O = TBi (2)PHNG CHLR zo q ru H2O																							69): (2)FSP TBi PHNG ILM sill q ru H2O = (2)FSP TBi PHNG sill q ru H2O
70): TBi (2)PHNG CHLR zo q ru H2O = TBi (2)PHNG zo q ru H2O																							70): FSP TBi PHNG ILM sill q H2O = FSP GARNET TBi PHNG ILM sill q H2O
71): TBi (2)PHNG zo q ru H2O = TBi (2)PHNG ab zo q ru H2O																							71): FSP GARNET TBi PHNG ILM sill q H2O = FSP GARNET TBi PHNG ILM ky q H2O
72): FSP TBi (2)PHNG ILM zo q ru H2O = FSP GARNET TBi (2)PHNG ILM zo q ru H2O																							72): TBi PHNG CHLR ab q ru sph H2O = TBi PHNG CHLR ab zo q ru H2O
73): FSP GARNET TBi (2)PHNG zo q ru H2O = FSP GARNET TBi (2)PHNG ILM zo q ru H2O																							73): TBi PHNG CHLR ab zo q ru H2O = FSP TBi PHNG CHLR ab q ru H2O
74): FSP GARNET TBi (2)PHNG zo q ru H2O = FSP GARNET TBi (2)PHNG q ru H2O																							74): TBi (2)PHNG CHLR ab zo q ru H2O = TBi PHNG CHLR ab zo q ru H2O
75): FSP GARNET TBi PHNG q ru H2O = FSP GARNET TBi PHNG ky q ru H2O																							75): TBi (2)PHNG CHLR ab q ru sph H2O = TBi (2)PHNG CHLR ab zo q ru H2O
76): (2)PHNG CHLR ab zo q sph H2O = PHNG CHLR ab zo q sph H2O																							76): FSP TBi PHNG ILM CHLR ab q ru H2O = FSP TBi (2)PHNG ILM CHLR q ru H2O
77): PHNG CHLR ab zo q sph H2O = TBi PHNG CHLR ab zo q sph H2O																							77): FSP TBi (2)PHNG ILM STAU q H2O = FSP TBi (2)PHNG ILM STAU sill q H2O
78): TBi (2)PHNG CHLR zo q sph H2O = TBi (2)PHNG CHLR zo q ru sph H2O																							78): FSP TBi (2)PHNG ILM STAU sill q H2O = FSP TBi PHNG ILM STAU sill q H2O
79): TBi (2)PHNG CHLR zo q ru sph H2O = TBi (2)PHNG CHLR zo q ru H2O																							79): FSP GARNET TBi PHNG ILM STAU q H2O = FSP TBi PHNG ILM STAU q H2O
80): TBi (2)PHNG CHLR zo q ru H2O = GARNET TBi (2)PHNG CHLR zo q ru H2O																							80): FSP TBi (2)PHNG ILM zo q ru H2O = FSP TBi (2)PHNG ILM q ru H2O
81): GARNET TBi (2)PHNG CHLR zo q ru H2O = GARNET TBi (2)PHNG zo q ru H2O																							81): FSP GARNET TBi (2)PHNG q ru H2O = FSP GARNET TBi (2)PHNG STAU q ru H2O
82): GARNET TBi (2)PHNG zo q ru H2O = GARNET TBi (2)PHNG ab zo q ru H2O																							82): FSP GARNET TBi (2)PHNG STAU q ru H2O = FSP GARNET TBi PHNG STAU q ru H2O
83): GARNET TBi (2)PHNG ab zo q ru H2O = FSP GARNET TBi (2)PHNG zo q ru H2O																							83): FSP GARNET TBi PHNG STAU q ru H2O = FSP GARNET TBi PHNG STAU ky q ru H2O
84): TBi (2)PHNG CHLR ab zo q sph H2O = (2)PHNG CHLR ab zo q sph H2O																							84): FSP GARNET TBi PHNG STAU ky q ru H2O = FSP GARNET TBi PHNG ky q ru H2O
85): FSP TBi PHNG CHLR ab q sph H2O = FSP TBi PHNG CHLR q ru sph H2O																							85): FSP GARNET TBi PHNG ILM STAU q ru H2O = FSP GARNET TBi PHNG ILM STAU q H2O
86): TBi (2)PHNG zo q ru H2O = TBi (2)PHNG zo q ru sph H2O																							86): FSP GARNET TBi (2)PHNG ILM STAU q ru H2O = FSP GARNET TBi PHNG ILM STAU q ru H2O
87): FSP TBi (2)PHNG ILM zo q H2O = FSP TBi (2)PHNG ILM CHLR q H2O																							87): FSP GARNET TBi (2)PHNG ILM q ru H2O = FSP GARNET TBi (2)PHNG ILM STAU q ru H2O
88): FSP GARNET TBi PHNG ILM STAU q H2O = FSP GARNET TBi PHNG ILM STAU q ru H2O																							88): FSP GARNET TBi (2)PHNG ILM zo q ru H2O = FSP TBi (2)PHNG ILM zo q ru H2O
89): FSP GARNET TBi PHNG ILM q ru H2O = FSP GARNET TBi PHNG ILM STAU q ru H2O																							89): FSP GARNET TBi (2)PHNG zo q ru H2O = FSP GARNET TBi (2)PHNG ILM zo q ru H2O
90): FSP GARNET TBi PHNG ILM q ru H2O = FSP GARNET TBi (2)PHNG ILM q ru H2O																							90): FSP TBi PHNG CHLR ab q ru H2O = FSP TBi (2)PHNG CHLR q ru H2O
91): FSP GARNET TBi PHNG ILM sill q H2O = FSP GARNET TBi PHNG ILM sill q ru H2O																							91): FSP TBi PHNG CHLR ab q ru H2O = FSP TBi (2)PHNG CHLR ab q ru H2O
92): FSP GARNET TBi PHNG sill q ru H2O = FSP GARNET TBi PHNG ILM sill q ru H2O																							92): FSP TBi (2)PHNG CHLR ab q ru H2O = FSP TBi PHNG CHLR ab q ru H2O
93): FSP GARNET TBi PHNG sill q ru H2O = FSP GARNET TBi PHNG ky q ru H2O																							93): FSP TBi (2)PHNG CHLR q ru H2O = FSP TBi (2)PHNG CHLR ab q ru H2O
94): TBi PHNG CHLR ab zo q sph H2O = TBi PHNG CHLR ab zo q ru H2O																							94): FSP TBi (2)PHNG CHLR q ru H2O = FSP TBi (2)PHNG CHLR ab q ru H2O
95): TBi PHNG CHLR ab zo q ru H2O = FSP TBi PHNG CHLR zo q ru H2O																							95): FSP TBi (2)PHNG ILM STAU sill q H2O = FSP TBi (2)PHNG ILM sill q H2O
96): FSP TBi PHNG ILM CHLR STAU q H2O = FSP TBi (2)PHNG ILM CHLR STAU q H2O																							96): FSP TBi (2)PHNG ILM sill q H2O = FSP TBi PHNG ILM sill q H2O
97): FSP TBi PHNG ILM STAU q H2O = FSP TBi PHNG ILM STAU ky q H2O																							97): TBi (2)PHNG CHLR ab zo q ru H2O = TBi (2)PHNG ab zo q ru H2O
98): FSP TBi PHNG ILM STAU ky q H2O = FSP GARNET TBi PHNG ILM STAU ky q H2O																							98): FSP TBi (2)PHNG zo q ru H2O = FSP TBi (2)PHNG CHLR zo q ru H2O
99): FSP GARNET TBi PHNG ILM STAU ky q H2O = FSP GARNET TBi PHNG ILM STAU sill q H2O																							99): FSP TBi (2)PHNG CHLR zo q ru H2O = FSP TBi (2)PHNG CHLR q ru H2O
100): FSP TBi (2)PHNG ILM CHLR q H2O = FSP TBi (2)PHNG ILM CHLR STAU q H2O																							100): FSP GARNET TBi (2)PHNG ILM zo q ru H2O = FSP GARNET TBi (2)PHNG ILM q ru H2O
101): FSP GARNET TBi (2)PHNG ILM CHLR STAU q H2O = FSP GARNET TBi (2)PHNG ILM STAU q H2O																							101): FSP GARNET TBi (2)PHNG q ru H2O = FSP GARNET TBi (2)PHNG ky q ru H2O
102): FSP GARNET TBi (2)PHNG ILM STAU q H2O = FSP TBi (2)PHNG ILM STAU q H2O																							102): FSP GARNET TBi (2)PHNG ky q ru H2O = FSP GARNET TBi PHNG ky q ru H2O
103): TBi (2)PHNG CHLR zo q sph H2O = TBi (2)PHNG CHLR zo q ru sph H2O																							103): FSP TBi (2)PHNG ILM STAU and q H2O = FSP TBi (2)PHNG ILM STAU sill q H2O
104): TBi (2)PHNG CHLR zo q ru sph H2O = TBi (2)PHNG zo q ru sph H2O																							104): FSP TBi PHNG CHLR ab q ru H2O = FSP TBi (2)PHNG CHLR q ru H2O
105): GARNET TBi (2)PHNG ab zo q ru H2O = TBi (2)PHNG ab zo q ru H2O																							105): FSP TBi (2)PHNG CHLR ab q ru H2O = FSP TBi PHNG CHLR ab q ru H2O
106): GARNET TBi (2)PHNG zo q ru H2O = TBi (2)PHNG zo q ru H2O																							106): FSP TBi (2)PHNG CHLR q ru H2O = FSP TBi (2)PHNG CHLR ab q ru H2O
107): FSP TBi (2)PHNG ILM zo q H2O = FSP TBi (2)PHNG ILM CHLR zo q H2O																							107): FSP GARNET TBi (2)PHNG ILM q ru H2O = FSP GARNET TBi (2)PHNG ILM STAU q H2O
108): FSP TBi (2)PHNG ILM CHLR zo q H2O = FSP TBi (2)PHNG ILM CHLR q H2O																							108): FSP GARNET TBi PHNG STAU q ru H2O = FSP GARNET TBi PHNG ILM STAU q ru H2O
109): FSP GARNET TBi (2)PHNG ILM zo q H2O = FSP GARNET TBi (2)PHNG ILM q H2O																							109): FSP GARNET TBi (2)PHNG q ru H2O = FSP GARNET TBi PHNG ky q ru H2O
110): FSP GARNET TBi PHNG STAU q ru H2O = FSP GARNET TBi PHNG ILM STAU q ru H2O																							110): FSP GARNET TBi (2)PHNG q ru H2O = FSP GARNET TBi PHNG ky q ru H2O
111): FSP TBi (2)PHNG CHLR zo q ru H2O = FSP TBi PHNG CHLR zo q ru H2O																							111): FSP TBi PHNG ILM CHLR ab q ru H2O = FSP TBi (2)PHNG CHLR q ru H2O
112): FSP TBi PHNG CHLR zo q ru H2O = FSP TBi (2)PHNG CHLR zo q ru H2O																							112): FSP TBi (2)PHNG ILM zo q H2O = FSP TBi (2)PHNG ILM q H2O
113): FSP TBi (2)PHNG CHLR zo q ru H2O = FSP TBi (2)PHNG zo q ru H2O																							113): FSP GARNET TBi PHNG ILM STAU q ru H2O = FSP GARNET TBi PHNG ILM STAU ky q H2O
114): FSP TBi PHNG ILM STAU ky q H2O = FSP TBi PHNG ILM STAU sill q H2O																							114): FSP GARNET TBi (2)PHNG ILM STAU q ru H2O = FSP GARNET TBi (2)PHNG ILM STAU q H2O
115): FSP TBi (2)PHNG ILM CHLR zo q H2O = FSP TBi (2)PHNG ILM CHLR q ru H2O																							115): FSP TBi PHNG CHLR ab q ru H2O = FSP TBi (2)PHNG CHLR q ru H2O
116): FSP TBi (2)PHNG ILM CHLR q ru H2O = FSP TBi (2)PHNG ILM zo q ru H2O																							116): FSP TBi PHNG CHLR ab q ru H2O = FSP TBi (2)PHNG CHLR q ru H2O
117): FSP GARNET TBi PHNG ILM STAU q ru H2O = FSP GARNET TBi PHNG ILM STAU ky q H2O																							117): FSP TBi (2)PHNG CHLR ab q ru H2O = FSP TBi PHNG CHLR ab q ru H2O
118): TBi (2)PHNG CHLR zo q sph H2O = TBi (2)PHNG zo q ru sph H2O																							118): FSP TBi (2)PHNG CHLR q ru H2O = FSP TBi (2)PHNG CHLR ab q ru H2O
119): FSP GARNET TBi PHNG ILM q ru H2O = FSP GARNET TBi PHNG q ru H2O																							119): FSP TBi (2)PHNG ILM sill q H2O = FSP TBi (2)PHNG ILM and q H2O
120): FSP TBi PHNG CHLR zo q ru H2O = FSP TBi PHNG ILM CHLR zo q ru H2O																							120): FSP TBi PHNG ILM sill q ru H2O = (2)FSP TBi PHNG sill q ru H2O
121): FSP GARNET TBi (2)PHNG ILM zo q H2O = FSP TBi (2)PHNG ILM CHLR zo q H2O																							121): FSP TBi (2)PHNG ILM STAU q H2O = FSP TBi PHNG ILM STAU sill q H2O
122): FSP TBi (2)PHNG ILM CHLR zo q H2O = FSP TBi (2)PHNG ILM CHLR q H2O																							122): FSP TBi (2)PHNG CHLR ab q ru H2O = FSP TBi PHNG CHLR ab q ru H2O
123): FSP GARNET TBi (2)PHNG ILM zo q H2O = FSP TBi (2)PHNG ILM CHLR q H2O																							123): FSP TBi (2)PHNG CHLR q ru H2O = FSP TBi (2)PHNG CHLR ab q ru H2O
124): FSP GARNET TBi (2)PHNG ILM q ru H2O = FSP GARNET TBi (2)PHNG ILM STAU q ru H2O																							124): FSP TBi PHNG ILM STAU q H2O = FSP GARNET TBi PHNG ILM STAU ky q H2O
125): FSP GARNET TBi (2)PHNG ILM STAU q ru H2O = FSP GARNET TBi PHNG ILM STAU q ru H2O																							125): FSP GARNET TBi PHNG STAU ky q ru H2O = FSP GARNET TBi PHNG ILM ky q ru H2O
126): TBi PHNG CHLR ab zo q ru H2O = TBi (2)PHNG CHLR ab zo q ru H2O																							126): FSP GARNET TBi (2)PHNG STAU q ru H2O = FSP GARNET TBi PHNG ILM STAU q ru H2O
127): TBi (2)PHNG CHLR ab zo q ru H2O = TBi (2)PHNG ab zo q ru H2O																							127): FSP TBi PHNG CHLR ab q ru H2O = FSP TBi (2)PHNG CHLR q ru H2O
128): FSP TBi (2)PHNG zo q ru H2O = FSP GARNET TBi (2)PHNG zo q ru H2O																							128): FSP TBi (2)PHNG ILM CHLR q ru H2O = FSP TBi (2)PHNG ILM q H2O
129): FSP GARNET TBi PHNG ILM ky q ru H2O = FSP GARNET TBi PHNG ILM sill q ru H2O																							129): (2)FSP TBi PHNG sill q ru H2O = (2)FSP TBi ILM sill q ru H2O
130): FSP TBi (2)PHNG ILM CHLR q ru H2O = FSP TBi (2)PHNG ILM zo q H2O																							130): FSP TBi (2)PHNG ILM STAU sill q H2O = FSP TBi PHNG ILM sill q H2O
131): FSP GARNET TBi PHNG STAU q ru H2O = FSP GARNET TBi PHNG ky q ru H2O																							131): FSP TBi (2)PHNG zo q ru H2O = FSP TBi (2)PHNG ILM CHLR q ru H2O
132): FSP TBi PHNG ILM STAU sill q H2O = FSP TBi PHNG ILM STAU and q H2O																							132): FSP GARNET TBi PHNG ILM ky q H2O = FSP TBi PHNG ILM sill q H2O
133): TBi PHNG CHLR ab zo q sph H2O = TBi PHNG CHLR ab zo q ru sph H2O																							133): FSP GARNET TBi PHNG ILM STAU q ru H2O = FSP GARNET TBi PHNG ILM ky q ru H2O
134): TBi PHNG CHLR ab zo q ru sph H2O = TBi PHNG CHLR ab zo q ru H2O																							134): FSP TBi (2)PHNG ILM zo q ru H2O = FSP GARNET TBi (2)PHNG ILM zo q H2O
135): FSP TBi (2)PHNG ILM zo q ru H2O = FSP TBi (2)PHNG CHLR zo q ru H2O																							135): FSP GARNET TBi (2)PHNG STAU q ru H2O = FSP GARNET TBi (2)PHNG ILM STAU q ru H2O
136): FSP TBi (2)PHNG ILM zo q ru H2O = FSP TBi PHNG ILM CHLR q ru H2O																							136): FSP GARNET TBi (2)PHNG ky q ru H2O = FSP GARNET TBi PHNG STAU ky q ru H2O
137): FSP GARNET TBi PHNG ILM ky q ru H2O = FSP GARNET TBi PHNG ILM sill q H2O																							137): FSP GARNET TBi (2)PHNG ky q ru H2O = FSP GARNET TBi PHNG ky q ru H2O
138): FSP TBi (2)PHNG ILM zo q H2O = FSP TBi (2)PHNG ILM CHLR zo q H2O																							138): FSP GARNET TBi (2)PHNG q ru H2O = FSP GARNET TBi (2)PHNG ky q ru H2O
139): FSP TBi (2)PHNG ILM CHLR zo q H2O = FSP TBi (2)PHNG ILM CHLR q H2O
140): TBi (2)PHNG CHLR zo q sph H2O = TBi (2)PHNG zo q ru sph H2O
141): FSP TBi PHNG ILM CHLR q ru H2O = FSP TBi (2)PHNG ILM CHLR q H2O
142): TBi PHNG CHLR ab zo q sph H2O = FSP TBi PHNG CHLR zo q ru H2O
143): FSP TBi PHNG ILM STAU sill q H2O = FSP GARNET TBi PHNG ILM sill q H2O
144): FSP GARNET TBi (2)PHNG ILM STAU q ru H2O = FSP GARNET TBi (2)PHNG ILM STAU q H2O
145): TBi (2)PHNG CHLR zo q sph H2O = TBi (2)PHNG ab zo q ru H2O
146): FSP TBi (2)PHNG ILM zo q ru H2O = FSP TBi PHNG CHLR zo q ru H2O
147): FSP TBi (2)PHNG ILM CHLR zo q ru H2O = FSP TBi PHNG ILM CHLR zo q ru H2O
148): FSP TBi (2)PHNG ILM zo q ru H2O = FSP TBi (2)PHNG ILM CHLR zo q ru H2O
149): FSP GARNET TBi PHNG ILM STAU q ru H2O = FSP GARNET TBi PHNG ILM ky q ru H2O
150): FSP GARNET TBi (2)PHNG ILM zo q ru H2O = FSP TBi (2)PHNG ILM zo q H2O
151): FSP TBi (2)PHNG ILM CHLR q H2O = FSP TBi (2)PHNG ILM zo q H2O
152): TBi (2)PHNG CHLR zo q ru H2O = GARNET TBi (2)PHNG zo q ru H2O
153): FSP TBi (2)PHNG ILM zo q H2O = FSP TBi (2)PHNG ILM CHLR zo q H2O
154): FSP TBi (2)PHNG ILM CHLR zo q H2O = FSP TBi (2)PHNG ILM CHLR q H2O
155): FSP TBi (2)PHNG ILM zo q H2O = FSP TBi (2)PHNG ILM CHLR q H2O
156): FSP TBi PHNG ILM CHLR STAU q H2O = FSP TBi (2)PHNG ILM STAU q H2O
157): TBi PHNG CHLR ab zo q sph H2O = FSP TBi PHNG CHLR q ru sph H2O
158): FSP GARNET TBi (2)PHNG ILM CHLR q H2O = FSP TBi (2)PHNG ILM CHLR STAU q H2O
159): FSP GARNET TBi (2)PHNG ILM zo q H2O = FSP TBi (2)PHNG ILM CHLR q H2O
160): FSP GARNET TBi PHNG ILM STAU ky q H2O = FSP GARNET TBi PHNG ILM sill q H2O
161): TBi PHNG CHLR ab zo q sph H2O = TBi PHNG CHLR ab zo q ru H2O
162): TBi (2)PHNG CHLR zo q ru sph H2O = TBi (2)PHNG zo q ru sph H2O
163): TBi (2)PHNG CHLR zo q sph H2O = TBi (2)PHNG CHLR zo q ru sph H2O
164): FSP TBi (2)PHNG ILM zo q ru H2O = FSP TBi (2)PHNG CHLR zo q ru H2O
165): FSP TBi (2)PHNG ILM zo q ru H2O = FSP TBi PHNG CHLR zo q ru H2O
166): FSP TBi (2)PHNG ILM zo q ru H2O = FSP TBi PHNG ILM CHLR zo q ru H2O
167): FSP GARNET TBi (2)PHNG ILM q ru H2O = FSP GARNET TBi (2)PHNG ILM STAU q H2O
168): FSP TBi (2)PHNG ILM CHLR q H2O = FSP TBi (2)PHNG ILM zo q H2O
169): FSP TBi (2)PHNG ILM CHLR zo q H2O = FSP TBi (2)PHNG ILM CHLR q H2O
170): FSP TBi (2)PHNG ILM zo q H2O = FSP TBi (2)PHNG ILM CHLR zo q H2O
171): TBi (2)PHNG CHLR zo q sph H2O = TBi (2)PHNG zo q ru sph H2O
172): FSP GARNET TBi PHNG STAU ky q ru H2O = FSP GARNET TBi PHNG ILM ky q ru H2O
173): FSP GARNET TBi PHNG ky q ru H2O = FSP GARNET TBi PHNG ILM sill q ru H2O
174): FSP TBi (2)PHNG ILM zo q H2O = FSP TBi (2)PHNG ILM CHLR zo q H2O
175): FSP TBi (2)PHNG ILM CHLR zo q H2O = FSP TBi (2)PHNG ILM CHLR q H2O
176): FSP TBi (2)PHNG ILM zo q H2O = FSP TBi (2)PHNG ILM CHLR q H2O

## Sheet: B50_1-p
Path B 50_1 primary composition, core																							Path B 50_1 primary composition, rim
Core model reactions																							Rim model reactions
1): FSP TBi PHNG ILM CHLR ab q sph H2O = FSP TBi PHNG ILM CHLR q sph H2O																							1): TBi PHNG CHLR ab q ru sph H2O = FSP TBi PHNG CHLR ab q ru H2O
2): FSP TBi PHNG ILM CHLR q sph H2O = FSP TBi PHNG ILM CHLR q H2O																							2): FSP TBi PHNG CHLR ab q ru H2O = FSP TBi PHNG ILM CHLR ab q ru H2O
3): FSP TBi PHNG ILM CHLR q H2O = FSP GARNET TBi PHNG ILM CHLR q H2O																							3): FSP TBi PHNG ILM CHLR ab q ru H2O = FSP TBi PHNG ILM CHLR q ru H2O
4): FSP GARNET TBi PHNG ILM CHLR q H2O = FSP GARNET TBi PHNG ILM CHLR STAU q H2O																							4): FSP TBi PHNG ILM CHLR q ru H2O = FSP TBi PHNG ILM CHLR q H2O
5): FSP GARNET TBi PHNG ILM CHLR STAU q H2O = FSP GARNET TBi PHNG ILM STAU q H2O																							5): FSP TBi PHNG ILM CHLR q H2O = FSP TBi (2)PHNG ILM CHLR q H2O
6): FSP GARNET TBi PHNG ILM STAU q H2O = FSP GARNET TBi PHNG ILM STAU and q H2O																							6): FSP TBi (2)PHNG ILM CHLR q H2O = FSP TBi (2)PHNG ILM q H2O
7): FSP GARNET TBi PHNG ILM STAU and q H2O = FSP GARNET TBi PHNG ILM STAU sill q H2O																							7): FSP TBi (2)PHNG ILM q H2O = FSP TBi (2)PHNG ILM and q H2O
8): FSP GARNET TBi PHNG ILM STAU sill q H2O = FSP GARNET TBi PHNG ILM sill q H2O																							8): FSP TBi (2)PHNG ILM and q H2O = FSP TBi PHNG ILM and q H2O
9): FSP GARNET TBi PHNG ILM sill q H2O = FSP TBi PHNG ILM sill q H2O																							9): FSP TBi PHNG ILM and q H2O = FSP TBi PHNG ILM sill q H2O
10): FSP TBi PHNG ILM sill q H2O = (2)FSP TBi PHNG ILM sill q H2O																							10): FSP TBi PHNG ILM sill q H2O = FSP TBi PHNG ILM sill q ru H2O
11): (2)FSP TBi PHNG ILM sill q H2O = (2)FSP TBi ILM sill q H2O																							11): FSP TBi PHNG ILM sill q ru H2O = FSP TBi PHNG sill q ru H2O
12): (2)FSP TBi ILM sill q H2O = (2)FSP GARNET TBi ILM sill q H2O																							12): FSP TBi PHNG sill q ru H2O = (2)FSP TBi PHNG sill q ru H2O
13): TBi PHNG CHLR ab zo q sph H2O = FSP TBi PHNG CHLR ab q sph H2O																							13): (2)FSP TBi PHNG sill q ru H2O = (2)FSP TBi sill q ru H2O
14): FSP TBi PHNG CHLR ab q sph H2O = FSP TBi PHNG ILM CHLR ab q sph H2O																							14): (2)FSP TBi sill q ru H2O = (2)FSP TBi ILM sill q ru H2O
15): FSP GARNET TBi PHNG ILM STAU q H2O = FSP GARNET TBi PHNG ILM STAU sill q H2O																							15): (2)FSP TBi ILM sill q ru H2O = (2)FSP TBi ILM sill q H2O
16): TBi PHNG CHLR ab zo q sph H2O = GARNET TBi PHNG CHLR ab zo q sph H2O																							16): (2)FSP TBi ILM sill q H2O = (2)FSP TBi ILM CORD sill q H2O
17): GARNET TBi PHNG CHLR ab zo q sph H2O = FSP GARNET TBi PHNG CHLR ab q sph H2O																							17): (2)FSP TBi ILM CORD sill q H2O = (2)FSP TBi ILM CORD q H2O
18): FSP GARNET TBi PHNG CHLR ab q sph H2O = FSP TBi PHNG CHLR ab q sph H2O																							18): FSP TBi (2)PHNG ILM q H2O = FSP TBi (2)PHNG ILM STAU q H2O
19): FSP TBi PHNG ILM CHLR q sph H2O = FSP TBi PHNG ILM CHLR zo q sph H2O																							19): FSP TBi (2)PHNG ILM STAU q H2O = FSP TBi PHNG ILM STAU q H2O
20): FSP TBi PHNG ILM CHLR zo q sph H2O = FSP TBi PHNG ILM CHLR zo q H2O																							20): FSP TBi PHNG ILM STAU q H2O = FSP TBi PHNG ILM STAU sill q H2O
21): FSP TBi PHNG ILM CHLR zo q H2O = FSP TBi PHNG ILM CHLR q H2O																							21): FSP TBi PHNG ILM STAU sill q H2O = FSP TBi PHNG ILM sill q H2O
22): FSP GARNET TBi PHNG ILM sill q H2O = (2)FSP GARNET TBi PHNG ILM sill q H2O																							22): FSP TBi PHNG ILM CHLR q ru H2O = FSP TBi (2)PHNG ILM CHLR q ru H2O
23): (2)FSP GARNET TBi PHNG ILM sill q H2O = (2)FSP GARNET TBi ILM sill q H2O																							23): FSP TBi (2)PHNG ILM CHLR q ru H2O = FSP TBi (2)PHNG ILM CHLR q H2O
24): FSP GARNET TBi PHNG CHLR ab q sph H2O = FSP GARNET TBi PHNG ILM CHLR ab q sph H2O																							24): FSP TBi PHNG CHLR ab q ru H2O = FSP TBi (2)PHNG CHLR q ru H2O
25): FSP GARNET TBi PHNG CHLR ab q sph H2O = FSP GARNET TBi PHNG ILM CHLR ab q sph H2O																							25): FSP TBi (2)PHNG CHLR q ru H2O = FSP TBi (2)PHNG ILM CHLR q ru H2O
26): FSP GARNET TBi PHNG CHLR ab q sph H2O = FSP GARNET TBi PHNG ILM CHLR ab q sph H2O																							26): FSP TBi PHNG ILM sill q ru H2O = (2)FSP TBi PHNG ILM sill q ru H2O
27): FSP GARNET TBi PHNG CHLR ab q sph H2O = FSP GARNET TBi PHNG ILM CHLR ab q sph H2O																							27): (2)FSP TBi PHNG ILM sill q ru H2O = (2)FSP TBi ILM sill q ru H2O
28): FSP GARNET TBi PHNG ILM CHLR ab q sph H2O = FSP GARNET TBi PHNG ILM CHLR q sph H2O																							28): FSP TBi PHNG ILM STAU q H2O = FSP TBi PHNG ILM STAU ky q H2O
29): FSP GARNET TBi PHNG ILM CHLR ab q sph H2O = FSP GARNET TBi PHNG ILM CHLR q sph H2O																							29): FSP TBi PHNG ILM STAU ky q H2O = FSP TBi PHNG ILM STAU sill q H2O
30): FSP GARNET TBi PHNG ILM CHLR q sph H2O = FSP GARNET TBi PHNG ILM CHLR zo q sph H2O																							30): TBi PHNG CHLR ab q ru sph H2O = TBi (2)PHNG CHLR ab q ru sph H2O
31): FSP GARNET TBi PHNG ILM CHLR zo q sph H2O = FSP TBi PHNG ILM CHLR zo q sph H2O																							31): TBi (2)PHNG CHLR ab q ru sph H2O = TBi (2)PHNG ab q ru sph H2O
32): GARNET TBi PHNG CHLR ab zo q sph H2O = GARNET TBi PHNG ILM CHLR ab zo q sph H2O																							32): TBi (2)PHNG ab q ru sph H2O = TBi (2)PHNG ab zo q ru H2O
33): GARNET TBi PHNG ILM CHLR ab zo q sph H2O = TBi PHNG ILM CHLR ab zo q sph H2O																							33): TBi (2)PHNG ab zo q ru H2O = FSP TBi (2)PHNG zo q ru H2O
34): TBi PHNG ILM CHLR ab zo q sph H2O = TBi PHNG ILM CHLR ab zo q H2O																							34): FSP TBi (2)PHNG zo q ru H2O = FSP TBi (2)PHNG CHLR q ru H2O
35): TBi PHNG ILM CHLR ab zo q H2O = FSP TBi PHNG ILM CHLR zo q H2O																							35): FSP TBi (2)PHNG ILM CHLR q ru H2O = FSP TBi (2)PHNG ILM q ru H2O
36): FSP TBi PHNG ILM CHLR zo q H2O = FSP GARNET TBi PHNG ILM CHLR zo q H2O																							36): FSP TBi (2)PHNG ILM q ru H2O = FSP TBi (2)PHNG ILM q H2O
37): FSP GARNET TBi PHNG ILM CHLR zo q H2O = FSP GARNET TBi PHNG ILM CHLR q H2O																							37): FSP TBi PHNG ILM STAU ky q H2O = FSP TBi PHNG ILM ky q H2O
38): FSP GARNET TBi (2)PHNG ILM CHLR q H2O = FSP GARNET TBi PHNG ILM CHLR q H2O																							38): FSP TBi PHNG ILM ky q H2O = FSP TBi PHNG ILM sill q H2O
39): FSP GARNET TBi (2)PHNG ILM CHLR q H2O = FSP GARNET TBi (2)PHNG ILM CHLR STAU q H2O																							39): FSP TBi (2)PHNG zo q ru H2O = FSP TBi (2)PHNG ILM zo q ru H2O
40): FSP GARNET TBi (2)PHNG ILM CHLR STAU q H2O = FSP GARNET TBi (2)PHNG ILM STAU q H2O																							40): FSP TBi (2)PHNG ILM zo q ru H2O = FSP TBi (2)PHNG ILM q ru H2O
41): FSP GARNET TBi (2)PHNG ILM STAU q H2O = FSP GARNET TBi PHNG ILM STAU q H2O																							41): FSP TBi (2)PHNG ILM q H2O = FSP GARNET TBi (2)PHNG ILM q H2O
42): TBi PHNG ILM CHLR ab zo q H2O = GARNET TBi PHNG ILM CHLR ab zo q H2O																							42): FSP GARNET TBi (2)PHNG ILM q H2O = FSP GARNET TBi (2)PHNG ILM STAU q H2O
43): GARNET TBi PHNG ILM CHLR ab zo q H2O = GARNET TBi (2)PHNG ILM CHLR ab zo q H2O																							43): FSP GARNET TBi (2)PHNG ILM STAU q H2O = FSP TBi (2)PHNG ILM STAU q H2O
44): GARNET TBi (2)PHNG ILM CHLR ab zo q H2O = GARNET TBi (2)PHNG ILM CHLR zo q H2O																							44): FSP GARNET TBi (2)PHNG ILM STAU q H2O = FSP GARNET TBi PHNG ILM STAU q H2O
45): GARNET TBi (2)PHNG ILM CHLR zo q H2O = FSP GARNET TBi (2)PHNG ILM CHLR zo q H2O																							45): FSP GARNET TBi PHNG ILM STAU q H2O = FSP GARNET TBi PHNG ILM STAU ky q H2O
46): FSP GARNET TBi (2)PHNG ILM CHLR zo q H2O = FSP GARNET TBi PHNG ILM CHLR zo q H2O																							46): FSP GARNET TBi PHNG ILM STAU ky q H2O = FSP GARNET TBi PHNG ILM ky q H2O
47): FSP GARNET TBi (2)PHNG ILM q H2O = FSP GARNET TBi (2)PHNG ILM CHLR q H2O																							47): FSP GARNET TBi PHNG ILM ky q H2O = FSP TBi PHNG ILM ky q H2O
48): FSP GARNET TBi (2)PHNG ILM q H2O = FSP GARNET TBi PHNG ILM q H2O																							48): FSP TBi (2)PHNG zo q ru H2O = FSP GARNET TBi (2)PHNG zo q ru H2O
49): FSP GARNET TBi PHNG ILM q H2O = FSP GARNET TBi PHNG ILM STAU q H2O																							49): FSP GARNET TBi (2)PHNG zo q ru H2O = FSP GARNET TBi (2)PHNG q ru H2O
50): FSP GARNET TBi PHNG ILM STAU q H2O = FSP GARNET TBi PHNG ILM STAU ky q H2O																							50): FSP GARNET TBi (2)PHNG q ru H2O = FSP GARNET TBi (2)PHNG ILM q ru H2O
51): FSP GARNET TBi PHNG ILM STAU ky q H2O = FSP GARNET TBi PHNG ILM ky q H2O																							51): FSP GARNET TBi (2)PHNG ILM q ru H2O = FSP GARNET TBi (2)PHNG ILM q H2O
52): FSP GARNET TBi PHNG ILM ky q H2O = FSP GARNET TBi PHNG ILM sill q H2O																							52): FSP GARNET TBi (2)PHNG q ru H2O = FSP GARNET TBi PHNG q ru H2O
53): GARNET TBi PHNG CHLR ab zo q sph H2O = GARNET TBi (2)PHNG CHLR ab zo q sph H2O																							53): FSP GARNET TBi PHNG q ru H2O = FSP GARNET TBi PHNG ky q ru H2O
54): GARNET TBi (2)PHNG CHLR ab zo q sph H2O = GARNET TBi (2)PHNG CHLR zo q sph H2O																							54): FSP GARNET TBi PHNG ky q ru H2O = FSP GARNET TBi PHNG ILM ky q ru H2O
55): GARNET TBi (2)PHNG CHLR zo q sph H2O = GARNET TBi (2)PHNG ILM CHLR zo q sph H2O																							55): FSP GARNET TBi PHNG ILM ky q ru H2O = FSP GARNET TBi PHNG ILM ky q H2O
56): GARNET TBi (2)PHNG ILM CHLR zo q sph H2O = GARNET TBi (2)PHNG ILM CHLR zo q H2O																							56): TBi (2)PHNG CHLR ab q ru sph H2O = TBi (2)PHNG CHLR q ru sph H2O
57): GARNET TBi (2)PHNG ILM CHLR zo q H2O = GARNET TBi (2)PHNG ILM zo q H2O																							57): TBi (2)PHNG CHLR q ru sph H2O = TBi (2)PHNG q ru sph H2O
58): GARNET TBi (2)PHNG ILM zo q H2O = FSP GARNET TBi (2)PHNG ILM zo q H2O																							58): TBi (2)PHNG q ru sph H2O = TBi (2)PHNG ab q ru sph H2O
59): FSP GARNET TBi (2)PHNG ILM zo q H2O = FSP GARNET TBi (2)PHNG ILM CHLR q H2O																							59): FSP TBi (2)PHNG ILM zo q ru H2O = FSP TBi (2)PHNG ILM CHLR q ru H2O
60): FSP GARNET TBi PHNG ILM q ru H2O = FSP GARNET TBi PHNG ILM q H2O																							60): FSP TBi (2)PHNG ILM q ru H2O = FSP GARNET TBi (2)PHNG ILM q ru H2O
61): FSP GARNET TBi PHNG ILM q ru H2O = FSP GARNET TBi PHNG ILM STAU q ru H2O																							61): FSP TBi PHNG ILM STAU ky q H2O = FSP GARNET TBi PHNG ILM STAU ky q H2O
62): FSP GARNET TBi PHNG ILM STAU q ru H2O = FSP GARNET TBi PHNG ILM STAU q H2O																							62): FSP GARNET TBi PHNG ILM sill q H2O = FSP TBi PHNG ILM sill q H2O
63): FSP GARNET TBi (2)PHNG ILM zo q H2O = FSP GARNET TBi (2)PHNG ILM zo q ru H2O																							63): FSP GARNET TBi PHNG ILM sill q H2O = FSP GARNET TBi PHNG ILM ky q H2O
64): FSP GARNET TBi (2)PHNG ILM zo q ru H2O = FSP GARNET TBi (2)PHNG ILM q ru H2O																							64): TBi PHNG CHLR ab q ru sph H2O = TBi PHNG CHLR ab zo q ru H2O
65): FSP GARNET TBi (2)PHNG ILM q ru H2O = FSP GARNET TBi (2)PHNG q ru H2O																							65): TBi PHNG CHLR ab zo q ru H2O = FSP TBi PHNG CHLR ab q ru H2O
66): FSP GARNET TBi (2)PHNG q ru H2O = FSP GARNET TBi PHNG q ru H2O																							66): TBi (2)PHNG CHLR ab zo q ru H2O = TBi PHNG CHLR ab zo q ru H2O
67): FSP GARNET TBi PHNG q ru H2O = FSP GARNET TBi PHNG ky q ru H2O																							67): TBi (2)PHNG CHLR ab zo q ru H2O = TBi PHNG CHLR ab zo q ru H2O
68): FSP GARNET TBi PHNG ky q ru H2O = FSP GARNET TBi PHNG sill q ru H2O																							68): TBi (2)PHNG ab q ru sph H2O = TBi (2)PHNG CHLR ab zo q ru H2O
69): FSP GARNET TBi PHNG sill q ru H2O = FSP GARNET TBi PHNG ILM sill q ru H2O																							69): FSP TBi (2)PHNG ILM STAU q H2O = FSP TBi (2)PHNG ILM STAU sill q H2O
70): FSP GARNET TBi PHNG ILM sill q ru H2O = FSP GARNET TBi PHNG ILM sill q H2O																							70): FSP TBi (2)PHNG ILM STAU sill q H2O = FSP TBi PHNG ILM STAU sill q H2O
71): GARNET TBi (2)PHNG CHLR zo q sph H2O = GARNET TBi (2)PHNG CHLR zo q ru H2O																							71): (2)FSP TBi PHNG ILM sill q ru H2O = (2)FSP TBi PHNG sill q ru H2O
72): GARNET TBi (2)PHNG CHLR zo q ru H2O = GARNET TBi (2)PHNG ILM CHLR zo q ru H2O																							72): FSP GARNET TBi PHNG ILM STAU q H2O = FSP TBi PHNG ILM STAU q H2O
73): GARNET TBi (2)PHNG ILM CHLR zo q ru H2O = GARNET TBi (2)PHNG ILM CHLR zo q H2O																							73): FSP TBi (2)PHNG ILM zo q ru H2O = FSP GARNET TBi (2)PHNG ILM zo q ru H2O
74): GARNET TBi (2)PHNG ILM zo q ru H2O = GARNET TBi (2)PHNG ILM zo q H2O																							74): FSP GARNET TBi (2)PHNG ILM zo q ru H2O = FSP GARNET TBi (2)PHNG ILM q ru H2O
75): GARNET TBi (2)PHNG ILM zo q ru H2O = GARNET TBi (2)PHNG ILM ab zo q ru H2O																							75): FSP GARNET TBi PHNG q ru H2O = FSP GARNET TBi PHNG STAU q ru H2O
76): GARNET TBi (2)PHNG ILM ab zo q ru H2O = FSP GARNET TBi (2)PHNG ILM zo q ru H2O																							76): FSP GARNET TBi PHNG STAU q ru H2O = FSP GARNET TBi PHNG STAU ky q ru H2O
77): FSP GARNET TBi (2)PHNG ILM zo q ru H2O = FSP GARNET TBi (2)PHNG zo q ru H2O																							77): FSP GARNET TBi PHNG STAU ky q ru H2O = FSP GARNET TBi PHNG ky q ru H2O
78): FSP GARNET TBi (2)PHNG zo q ru H2O = FSP GARNET TBi (2)PHNG q ru H2O																							78): FSP GARNET TBi (2)PHNG ILM q ru H2O = FSP GARNET TBi (2)PHNG ILM STAU q H2O
79): GARNET TBi (2)PHNG CHLR zo q ru H2O = GARNET TBi (2)PHNG zo q ru H2O																							79): FSP TBi PHNG ILM CHLR ab q ru H2O = FSP TBi (2)PHNG ILM CHLR q ru H2O
80): GARNET TBi (2)PHNG zo q ru H2O = GARNET TBi (2)PHNG ab zo q ru H2O																							80): FSP TBi (2)PHNG ILM STAU sill q H2O = FSP TBi (2)PHNG ILM sill q H2O
81): GARNET TBi (2)PHNG ab zo q ru H2O = FSP GARNET TBi (2)PHNG zo q ru H2O																							81): FSP TBi (2)PHNG ILM sill q H2O = FSP TBi PHNG ILM sill q H2O
82): GARNET (2)PHNG CHLR ab zo q sph H2O = GARNET TBi (2)PHNG CHLR ab zo q sph H2O																							82): TBi (2)PHNG CHLR ab zo q ru H2O = TBi (2)PHNG ab zo q ru H2O
83): GARNET TBi (2)PHNG zo q ru H2O = GARNET TBi (2)PHNG zo q ru sph H2O																							83): FSP TBi (2)PHNG ILM zo q ru H2O = FSP GARNET TBi (2)PHNG zo q ru H2O
84): GARNET TBi (2)PHNG zo q ru sph H2O = GARNET TBi (2)PHNG ab zo q ru H2O																							84): FSP TBi (2)PHNG ILM zo q ru H2O = FSP GARNET TBi (2)PHNG zo q ru H2O
85): GARNET PHNG CHLR ab zo q sph H2O = GARNET TBi PHNG CHLR ab zo q sph H2O																							85): FSP TBi (2)PHNG ILM zo q ru H2O = FSP GARNET TBi (2)PHNG zo q ru H2O
86): GARNET (2)PHNG CHLR ab zo q sph H2O = GARNET PHNG CHLR ab zo q sph H2O																							86): FSP GARNET TBi (2)PHNG ILM zo q ru H2O = FSP TBi (2)PHNG ILM zo q ru H2O
87): FSP GARNET TBi (2)PHNG ILM q ru H2O = FSP GARNET TBi (2)PHNG ILM q H2O																							87): FSP GARNET TBi (2)PHNG zo q ru H2O = FSP GARNET TBi (2)PHNG ILM zo q ru H2O
88): FSP GARNET TBi (2)PHNG ILM q ru H2O = FSP GARNET TBi (2)PHNG ILM q H2O																							88): FSP TBi (2)PHNG ILM and q H2O = FSP TBi (2)PHNG ILM STAU and q H2O
89): FSP GARNET TBi PHNG q ru H2O = FSP GARNET TBi PHNG ILM q ru H2O																							89): FSP TBi (2)PHNG ILM STAU sill q H2O = FSP TBi (2)PHNG ILM STAU and q H2O
90): FSP GARNET TBi PHNG ILM ky q H2O = FSP GARNET TBi PHNG ILM ky q ru H2O																							90): FSP TBi PHNG CHLR ab q ru H2O = FSP TBi (2)PHNG CHLR ab q ru H2O
91): FSP GARNET TBi PHNG ky q ru H2O = FSP GARNET TBi PHNG ILM ky q ru H2O																							91): FSP TBi (2)PHNG CHLR ab q ru H2O = FSP TBi (2)PHNG CHLR q ru H2O
92): FSP GARNET TBi PHNG ILM CHLR ab q sph H2O = FSP TBi PHNG ILM CHLR q sph H2O																							92): TBi PHNG CHLR ab zo q ru H2O = TBi (2)PHNG ab zo q ru H2O
93): TBi PHNG ILM CHLR ab zo q sph H2O = FSP TBi PHNG ILM CHLR zo q sph H2O																							93): FSP TBi (2)PHNG ILM zo q ru H2O = FSP GARNET TBi (2)PHNG ILM q ru H2O
94): GARNET TBi PHNG ILM CHLR ab zo q H2O = FSP GARNET TBi PHNG ILM CHLR zo q H2O																							94): FSP GARNET TBi (2)PHNG q ru H2O = FSP GARNET TBi (2)PHNG STAU q ru H2O
95): FSP GARNET TBi (2)PHNG ILM zo q H2O = FSP GARNET TBi PHNG ILM CHLR zo q H2O																							95): FSP GARNET TBi (2)PHNG STAU q ru H2O = FSP GARNET TBi PHNG STAU q ru H2O
96): FSP GARNET TBi (2)PHNG ILM q H2O = FSP GARNET TBi (2)PHNG ILM STAU q H2O																							96): FSP GARNET TBi PHNG ILM STAU q H2O = FSP GARNET TBi PHNG ILM STAU q ru H2O
97): FSP GARNET TBi (2)PHNG ILM zo q H2O = FSP GARNET TBi (2)PHNG ILM q H2O																							97): FSP GARNET TBi PHNG STAU q ru H2O = FSP GARNET TBi PHNG ILM STAU q ru H2O
98): GARNET TBi (2)PHNG ILM CHLR zo q sph H2O = GARNET TBi (2)PHNG ILM CHLR zo q ru H2O																							98): FSP GARNET TBi (2)PHNG ILM zo q ru H2O = FSP GARNET TBi (2)PHNG zo q ru H2O
99): GARNET TBi (2)PHNG zo q ru H2O = GARNET TBi (2)PHNG ILM zo q ru H2O																							99): FSP TBi (2)PHNG ILM STAU q H2O = FSP TBi (2)PHNG ILM STAU and q H2O
100): GARNET TBi (2)PHNG ILM zo q H2O = GARNET TBi (2)PHNG ILM ab zo q H2O																							100): FSP TBi (2)PHNG ILM zo q ru H2O = FSP GARNET TBi (2)PHNG ILM zo q ru H2O
101): GARNET TBi (2)PHNG ILM ab zo q H2O = FSP GARNET TBi (2)PHNG ILM zo q H2O																							101): FSP GARNET TBi (2)PHNG ILM zo q ru H2O = FSP GARNET TBi (2)PHNG ILM q ru H2O
102): FSP GARNET TBi (2)PHNG ILM q ru H2O = FSP GARNET TBi (2)PHNG ILM q H2O																							102): FSP GARNET TBi (2)PHNG q ru H2O = FSP GARNET TBi PHNG ILM STAU q ru H2O
103): FSP GARNET TBi PHNG ILM CHLR ab q sph H2O = FSP TBi PHNG ILM CHLR ab q sph H2O																							103): FSP GARNET TBi PHNG ILM STAU q ru H2O = FSP GARNET TBi PHNG ILM STAU ky q H2O
104): FSP GARNET TBi PHNG ILM CHLR ab q sph H2O = FSP TBi PHNG ILM CHLR ab q sph H2O																							104): FSP TBi (2)PHNG ILM zo q ru H2O = FSP GARNET TBi (2)PHNG ILM zo q ru H2O
105): FSP GARNET TBi PHNG ILM CHLR STAU q H2O = FSP GARNET TBi (2)PHNG ILM CHLR STAU q H2O																							105): FSP GARNET TBi (2)PHNG ILM zo q ru H2O = FSP GARNET TBi (2)PHNG zo q ru H2O
106): FSP GARNET TBi PHNG CHLR ab q sph H2O = FSP GARNET TBi PHNG ILM CHLR q sph H2O																							106): FSP TBi (2)PHNG ILM sill q H2O = FSP TBi (2)PHNG ILM and q H2O
107): GARNET TBi PHNG ILM CHLR ab zo q sph H2O = GARNET TBi PHNG ILM CHLR ab zo q H2O																							107): FSP TBi PHNG ILM sill q ru H2O = (2)FSP TBi PHNG sill q ru H2O
108): FSP GARNET TBi (2)PHNG ILM zo q H2O = FSP GARNET TBi (2)PHNG ILM CHLR zo q H2O																							108): FSP TBi (2)PHNG ILM zo q ru H2O = FSP GARNET TBi (2)PHNG ILM q ru H2O
109): FSP GARNET TBi (2)PHNG ILM q ru H2O = FSP GARNET TBi PHNG ILM q ru H2O																							109): FSP GARNET TBi (2)PHNG ILM q ru H2O = FSP GARNET TBi PHNG ILM STAU q ru H2O
110): FSP GARNET TBi PHNG ILM ky q ru H2O = FSP GARNET TBi PHNG ILM sill q ru H2O																							110): FSP GARNET TBi PHNG ILM STAU q ru H2O = FSP GARNET TBi PHNG ILM ky q ru H2O
111): GARNET TBi (2)PHNG ILM CHLR zo q ru H2O = GARNET TBi (2)PHNG ILM zo q ru H2O																							111): FSP GARNET TBi PHNG STAU ky q ru H2O = FSP GARNET TBi PHNG ILM ky q ru H2O
112): GARNET TBi (2)PHNG ILM ab zo q ru H2O = GARNET TBi (2)PHNG ILM ab zo q H2O																							112): FSP GARNET TBi (2)PHNG q ru H2O = FSP GARNET TBi PHNG STAU q ru H2O
113): GARNET TBi (2)PHNG ab zo q ru H2O = GARNET TBi (2)PHNG ILM ab zo q ru H2O																							113): FSP GARNET TBi PHNG STAU q ru H2O = FSP GARNET TBi PHNG ky q ru H2O
114): FSP GARNET TBi PHNG ILM CHLR STAU q H2O = FSP GARNET TBi (2)PHNG ILM STAU q H2O																							114): FSP TBi PHNG ILM CHLR ab q ru H2O = FSP TBi (2)PHNG CHLR ab q ru H2O
115): FSP GARNET TBi PHNG CHLR ab q sph H2O = FSP TBi PHNG ILM CHLR ab q sph H2O																							115): FSP TBi (2)PHNG CHLR ab q ru H2O = FSP TBi (2)PHNG CHLR q ru H2O
116): GARNET TBi PHNG ILM CHLR ab zo q sph H2O = FSP GARNET TBi PHNG ILM CHLR zo q sph H2O																							116): FSP TBi (2)PHNG ILM STAU q H2O = FSP TBi (2)PHNG ILM and q H2O
117): FSP GARNET TBi PHNG ILM CHLR q sph H2O = FSP TBi PHNG ILM CHLR q sph H2O																							117): FSP TBi (2)PHNG ILM STAU sill q H2O = FSP TBi PHNG ILM sill q H2O
118): GARNET TBi PHNG ILM CHLR ab zo q sph H2O = GARNET TBi (2)PHNG ILM CHLR zo q H2O																							118): FSP TBi PHNG ILM STAU ky q H2O = FSP GARNET TBi PHNG ILM ky q H2O
119): GARNET TBi PHNG ILM CHLR ab zo q sph H2O = TBi PHNG ILM CHLR ab zo q H2O																							119): FSP GARNET TBi (2)PHNG ILM q ru H2O = FSP GARNET TBi PHNG ILM STAU q ru H2O
120): FSP GARNET TBi (2)PHNG ILM zo q H2O = FSP GARNET TBi (2)PHNG ILM CHLR q H2O																							120): FSP GARNET TBi (2)PHNG ILM STAU q ru H2O = FSP GARNET TBi PHNG ILM STAU q ru H2O
121): FSP GARNET TBi (2)PHNG ILM CHLR zo q H2O = FSP GARNET TBi (2)PHNG ILM CHLR q H2O																							121): FSP GARNET TBi (2)PHNG ILM q ru H2O = FSP GARNET TBi (2)PHNG ILM STAU q ru H2O
122): FSP GARNET TBi (2)PHNG ILM zo q H2O = FSP GARNET TBi (2)PHNG ILM CHLR zo q H2O																							122): FSP GARNET TBi (2)PHNG ILM STAU q ru H2O = FSP GARNET TBi PHNG ILM STAU q ru H2O
123): FSP GARNET TBi PHNG ILM q ru H2O = FSP GARNET TBi PHNG ILM ky q ru H2O																							123): FSP GARNET TBi (2)PHNG q ru H2O = FSP GARNET TBi (2)PHNG ILM STAU q ru H2O
124): FSP GARNET TBi PHNG CHLR ab q sph H2O = FSP TBi PHNG ILM CHLR ab q sph H2O																							124): FSP GARNET TBi PHNG STAU q ru H2O = FSP GARNET TBi PHNG ILM ky q ru H2O
125): FSP GARNET TBi PHNG CHLR ab q sph H2O = FSP TBi PHNG ILM CHLR ab q sph H2O																							125): FSP TBi (2)PHNG ILM zo q ru H2O = FSP GARNET TBi (2)PHNG ILM zo q ru H2O
126): FSP GARNET TBi (2)PHNG ILM CHLR STAU q H2O = FSP GARNET TBi (2)PHNG ILM STAU q H2O																							126): FSP GARNET TBi (2)PHNG ILM zo q ru H2O = FSP GARNET TBi (2)PHNG zo q ru H2O
127): FSP GARNET TBi PHNG ILM CHLR STAU q H2O = FSP GARNET TBi (2)PHNG ILM CHLR STAU q H2O																							127): FSP GARNET TBi (2)PHNG q ru H2O = FSP GARNET TBi PHNG STAU q ru H2O
128): FSP GARNET TBi PHNG ILM STAU ky q H2O = FSP GARNET TBi PHNG ILM STAU sill q H2O																							128): FSP GARNET TBi (2)PHNG STAU q ru H2O = FSP GARNET TBi PHNG STAU q ru H2O
129): (2)FSP GARNET TBi PHNG ILM sill q H2O = (2)FSP TBi PHNG ILM sill q H2O																							129): FSP GARNET TBi (2)PHNG q ru H2O = FSP GARNET TBi (2)PHNG STAU q ru H2O
130): FSP GARNET TBi PHNG CHLR ab q sph H2O = FSP GARNET TBi PHNG ILM CHLR ab q sph H2O
131): FSP GARNET TBi PHNG ILM CHLR ab q sph H2O = FSP GARNET TBi PHNG ILM CHLR q sph H2O
132): FSP GARNET TBi PHNG ILM CHLR q sph H2O = FSP TBi PHNG ILM CHLR zo q sph H2O
133): GARNET TBi (2)PHNG CHLR ab zo q sph H2O = GARNET TBi (2)PHNG ILM CHLR zo q sph H2O
134): FSP GARNET TBi (2)PHNG ILM CHLR q H2O = FSP GARNET TBi (2)PHNG ILM STAU q H2O
135): GARNET TBi PHNG ILM CHLR ab zo q sph H2O = GARNET TBi (2)PHNG ILM CHLR ab zo q H2O
136): FSP GARNET TBi PHNG ILM STAU q ru H2O = FSP GARNET TBi PHNG ILM ky q ru H2O
137): GARNET TBi (2)PHNG CHLR zo q sph H2O = GARNET TBi (2)PHNG ILM CHLR zo q ru H2O
138): FSP GARNET TBi PHNG ILM CHLR STAU q H2O = FSP GARNET TBi (2)PHNG ILM STAU q H2O
139): TBi PHNG CHLR ab zo q sph H2O = FSP GARNET TBi PHNG CHLR ab q sph H2O
140): GARNET TBi PHNG CHLR ab zo q sph H2O = FSP GARNET TBi PHNG ILM CHLR q sph H2O
141): TBi PHNG ILM CHLR ab zo q sph H2O = FSP TBi PHNG ILM CHLR zo q H2O
142): FSP GARNET TBi PHNG CHLR ab q sph H2O = FSP TBi PHNG ILM CHLR ab q sph H2O
143): FSP GARNET TBi PHNG ILM CHLR ab q sph H2O = FSP TBi PHNG ILM CHLR ab q sph H2O
144): FSP GARNET TBi PHNG CHLR ab q sph H2O = FSP GARNET TBi PHNG ILM CHLR ab q sph H2O
145): GARNET TBi PHNG ILM CHLR ab zo q sph H2O = GARNET TBi (2)PHNG ILM CHLR zo q sph H2O
146): TBi PHNG ILM CHLR ab zo q H2O = FSP GARNET TBi PHNG ILM CHLR zo q H2O
147): GARNET TBi (2)PHNG ILM CHLR zo q H2O = FSP GARNET TBi (2)PHNG ILM zo q H2O
148): FSP GARNET TBi (2)PHNG ILM zo q ru H2O = FSP GARNET TBi (2)PHNG q ru H2O
149): FSP GARNET TBi PHNG CHLR ab q sph H2O = FSP GARNET TBi PHNG ILM CHLR ab q sph H2O
150): FSP GARNET TBi PHNG ILM CHLR ab q sph H2O = FSP TBi PHNG ILM CHLR ab q sph H2O
151): FSP GARNET TBi PHNG CHLR ab q sph H2O = FSP TBi PHNG ILM CHLR ab q sph H2O
152): FSP GARNET TBi PHNG ILM CHLR q H2O = FSP GARNET TBi (2)PHNG ILM CHLR STAU q H2O
153): FSP GARNET TBi PHNG ILM STAU ky q H2O = FSP GARNET TBi PHNG ILM sill q H2O
154): (2)FSP GARNET TBi PHNG ILM sill q H2O = (2)FSP TBi ILM sill q H2O
155): FSP TBi PHNG CHLR ab zo q sph H2O = FSP TBi PHNG CHLR ab q sph H2O
156): TBi PHNG CHLR ab zo q sph H2O = FSP TBi PHNG CHLR ab zo q sph H2O
157): FSP GARNET TBi PHNG CHLR ab q sph H2O = FSP GARNET TBi PHNG ILM CHLR q sph H2O
158): GARNET TBi PHNG ILM CHLR ab zo q sph H2O = FSP TBi PHNG ILM CHLR zo q sph H2O
159): FSP GARNET TBi (2)PHNG ILM q H2O = FSP GARNET TBi PHNG ILM STAU q H2O
160): GARNET TBi (2)PHNG ILM CHLR ab zo q H2O = FSP GARNET TBi (2)PHNG ILM CHLR zo q H2O
161): FSP GARNET TBi PHNG ILM STAU q ru H2O = FSP GARNET TBi PHNG ILM STAU ky q H2O
162): GARNET TBi (2)PHNG ab zo q ru H2O = FSP GARNET TBi (2)PHNG ILM zo q ru H2O

## Sheet: B50_1-d
Path B 50_1 diffused composition, core																							Path B 50_1 diffused composition, rim
Core model reactions																							Rim model reactions
1): FSP TBi PHNG ILM CHLR ab q sph H2O = FSP TBi PHNG ILM CHLR q sph H2O																							1): TBi PHNG CHLR ab q ru sph H2O = FSP TBi PHNG CHLR ab q ru H2O
2): FSP TBi PHNG ILM CHLR q sph H2O = FSP TBi PHNG ILM CHLR q H2O																							2): FSP TBi PHNG CHLR ab q ru H2O = FSP TBi PHNG ILM CHLR ab q ru H2O
3): FSP TBi PHNG ILM CHLR q H2O = FSP GARNET TBi PHNG ILM CHLR q H2O																							3): FSP TBi PHNG ILM CHLR ab q ru H2O = FSP TBi PHNG ILM CHLR q ru H2O
4): FSP GARNET TBi PHNG ILM CHLR q H2O = FSP GARNET TBi PHNG ILM CHLR STAU q H2O																							4): FSP TBi PHNG ILM CHLR q ru H2O = FSP TBi PHNG ILM CHLR q H2O
5): FSP GARNET TBi PHNG ILM CHLR STAU q H2O = FSP GARNET TBi PHNG ILM STAU q H2O																							5): FSP TBi PHNG ILM CHLR q H2O = FSP TBi (2)PHNG ILM CHLR q H2O
6): FSP GARNET TBi PHNG ILM STAU q H2O = FSP GARNET TBi PHNG ILM STAU and q H2O																							6): FSP TBi (2)PHNG ILM CHLR q H2O = FSP TBi (2)PHNG ILM q H2O
7): FSP GARNET TBi PHNG ILM STAU and q H2O = FSP GARNET TBi PHNG ILM STAU sill q H2O																							7): FSP TBi (2)PHNG ILM q H2O = FSP TBi (2)PHNG ILM and q H2O
8): FSP GARNET TBi PHNG ILM STAU sill q H2O = FSP GARNET TBi PHNG ILM sill q H2O																							8): FSP TBi (2)PHNG ILM and q H2O = FSP TBi PHNG ILM and q H2O
9): FSP GARNET TBi PHNG ILM sill q H2O = FSP TBi PHNG ILM sill q H2O																							9): FSP TBi PHNG ILM and q H2O = FSP TBi PHNG ILM sill q H2O
10): FSP TBi PHNG ILM sill q H2O = (2)FSP TBi PHNG ILM sill q H2O																							10): FSP TBi PHNG ILM sill q H2O = FSP TBi PHNG ILM sill q ru H2O
11): (2)FSP TBi PHNG ILM sill q H2O = (2)FSP TBi ILM sill q H2O																							11): FSP TBi PHNG ILM sill q ru H2O = FSP TBi PHNG sill q ru H2O
12): (2)FSP TBi ILM sill q H2O = (2)FSP GARNET TBi ILM sill q H2O																							12): FSP TBi PHNG sill q ru H2O = (2)FSP TBi PHNG sill q ru H2O
13): TBi PHNG CHLR ab zo q sph H2O = FSP TBi PHNG CHLR ab q sph H2O																							13): (2)FSP TBi PHNG sill q ru H2O = (2)FSP TBi sill q ru H2O
14): FSP TBi PHNG CHLR ab q sph H2O = FSP TBi PHNG ILM CHLR ab q sph H2O																							14): (2)FSP TBi sill q ru H2O = (2)FSP TBi ILM sill q ru H2O
15): FSP GARNET TBi PHNG ILM STAU q H2O = FSP GARNET TBi PHNG ILM STAU sill q H2O																							15): (2)FSP TBi ILM sill q ru H2O = (2)FSP TBi ILM sill q H2O
16): TBi PHNG CHLR ab zo q sph H2O = GARNET TBi PHNG CHLR ab zo q sph H2O																							16): (2)FSP TBi ILM sill q H2O = (2)FSP TBi ILM CORD sill q H2O
17): GARNET TBi PHNG CHLR ab zo q sph H2O = FSP GARNET TBi PHNG CHLR ab q sph H2O																							17): (2)FSP TBi ILM CORD sill q H2O = (2)FSP TBi ILM CORD q H2O
18): FSP GARNET TBi PHNG CHLR ab q sph H2O = FSP TBi PHNG CHLR ab q sph H2O																							18): FSP TBi (2)PHNG ILM q H2O = FSP TBi (2)PHNG ILM STAU q H2O
19): FSP TBi PHNG ILM CHLR q sph H2O = FSP TBi PHNG ILM CHLR zo q sph H2O																							19): FSP TBi (2)PHNG ILM STAU q H2O = FSP TBi PHNG ILM STAU q H2O
20): FSP TBi PHNG ILM CHLR zo q sph H2O = FSP TBi PHNG ILM CHLR zo q H2O																							20): FSP TBi PHNG ILM STAU q H2O = FSP TBi PHNG ILM STAU sill q H2O
21): FSP TBi PHNG ILM CHLR zo q H2O = FSP TBi PHNG ILM CHLR q H2O																							21): FSP TBi PHNG ILM STAU sill q H2O = FSP TBi PHNG ILM sill q H2O
22): FSP GARNET TBi PHNG ILM sill q H2O = (2)FSP GARNET TBi PHNG ILM sill q H2O																							22): FSP TBi PHNG ILM CHLR q ru H2O = FSP TBi (2)PHNG ILM CHLR q ru H2O
23): (2)FSP GARNET TBi PHNG ILM sill q H2O = (2)FSP GARNET TBi ILM sill q H2O																							23): FSP TBi (2)PHNG ILM CHLR q ru H2O = FSP TBi (2)PHNG ILM CHLR q H2O
24): FSP GARNET TBi PHNG CHLR ab q sph H2O = FSP GARNET TBi PHNG ILM CHLR ab q sph H2O																							24): FSP TBi PHNG CHLR ab q ru H2O = FSP TBi (2)PHNG CHLR q ru H2O
25): FSP GARNET TBi PHNG CHLR ab q sph H2O = FSP GARNET TBi PHNG ILM CHLR ab q sph H2O																							25): FSP TBi (2)PHNG CHLR q ru H2O = FSP TBi (2)PHNG ILM CHLR q ru H2O
26): FSP GARNET TBi PHNG CHLR ab q sph H2O = FSP GARNET TBi PHNG ILM CHLR ab q sph H2O																							26): FSP TBi PHNG ILM sill q ru H2O = (2)FSP TBi PHNG ILM sill q ru H2O
27): FSP GARNET TBi PHNG CHLR ab q sph H2O = FSP GARNET TBi PHNG ILM CHLR ab q sph H2O																							27): (2)FSP TBi PHNG ILM sill q ru H2O = (2)FSP TBi ILM sill q ru H2O
28): FSP GARNET TBi PHNG ILM CHLR ab q sph H2O = FSP GARNET TBi PHNG ILM CHLR q sph H2O																							28): FSP TBi PHNG ILM STAU q H2O = FSP TBi PHNG ILM STAU ky q H2O
29): FSP GARNET TBi PHNG ILM CHLR ab q sph H2O = FSP GARNET TBi PHNG ILM CHLR q sph H2O																							29): FSP TBi PHNG ILM STAU ky q H2O = FSP TBi PHNG ILM STAU sill q H2O
30): FSP GARNET TBi PHNG ILM CHLR q sph H2O = FSP GARNET TBi PHNG ILM CHLR zo q sph H2O																							30): TBi PHNG CHLR ab q ru sph H2O = TBi (2)PHNG CHLR ab q ru sph H2O
31): FSP GARNET TBi PHNG ILM CHLR zo q sph H2O = FSP TBi PHNG ILM CHLR zo q sph H2O																							31): TBi (2)PHNG CHLR ab q ru sph H2O = TBi (2)PHNG ab q ru sph H2O
32): GARNET TBi PHNG CHLR ab zo q sph H2O = GARNET TBi PHNG ILM CHLR ab zo q sph H2O																							32): TBi (2)PHNG ab q ru sph H2O = TBi (2)PHNG ab zo q ru H2O
33): GARNET TBi PHNG ILM CHLR ab zo q sph H2O = TBi PHNG ILM CHLR ab zo q sph H2O																							33): TBi (2)PHNG ab zo q ru H2O = FSP TBi (2)PHNG zo q ru H2O
34): TBi PHNG ILM CHLR ab zo q sph H2O = TBi PHNG ILM CHLR ab zo q H2O																							34): FSP TBi (2)PHNG zo q ru H2O = FSP TBi (2)PHNG CHLR q ru H2O
35): TBi PHNG ILM CHLR ab zo q H2O = FSP TBi PHNG ILM CHLR zo q H2O																							35): FSP TBi (2)PHNG ILM CHLR q ru H2O = FSP TBi (2)PHNG ILM q ru H2O
36): FSP TBi PHNG ILM CHLR zo q H2O = FSP GARNET TBi PHNG ILM CHLR zo q H2O																							36): FSP TBi (2)PHNG ILM q ru H2O = FSP TBi (2)PHNG ILM q H2O
37): FSP GARNET TBi PHNG ILM CHLR zo q H2O = FSP GARNET TBi PHNG ILM CHLR q H2O																							37): FSP TBi PHNG ILM STAU ky q H2O = FSP TBi PHNG ILM ky q H2O
38): FSP GARNET TBi (2)PHNG ILM CHLR q H2O = FSP GARNET TBi PHNG ILM CHLR q H2O																							38): FSP TBi PHNG ILM ky q H2O = FSP TBi PHNG ILM sill q H2O
39): FSP GARNET TBi (2)PHNG ILM CHLR q H2O = FSP GARNET TBi (2)PHNG ILM CHLR STAU q H2O																							39): FSP TBi (2)PHNG zo q ru H2O = FSP TBi (2)PHNG ILM zo q ru H2O
40): FSP GARNET TBi (2)PHNG ILM CHLR STAU q H2O = FSP GARNET TBi (2)PHNG ILM STAU q H2O																							40): FSP TBi (2)PHNG ILM zo q ru H2O = FSP TBi (2)PHNG ILM q ru H2O
41): FSP GARNET TBi (2)PHNG ILM STAU q H2O = FSP GARNET TBi PHNG ILM STAU q H2O																							41): FSP TBi (2)PHNG ILM q H2O = FSP GARNET TBi (2)PHNG ILM q H2O
42): TBi PHNG ILM CHLR ab zo q H2O = GARNET TBi PHNG ILM CHLR ab zo q H2O																							42): FSP GARNET TBi (2)PHNG ILM q H2O = FSP GARNET TBi (2)PHNG ILM STAU q H2O
43): GARNET TBi PHNG ILM CHLR ab zo q H2O = GARNET TBi (2)PHNG ILM CHLR ab zo q H2O																							43): FSP GARNET TBi (2)PHNG ILM STAU q H2O = FSP TBi (2)PHNG ILM STAU q H2O
44): GARNET TBi (2)PHNG ILM CHLR ab zo q H2O = GARNET TBi (2)PHNG ILM CHLR zo q H2O																							44): FSP GARNET TBi (2)PHNG ILM STAU q H2O = FSP GARNET TBi PHNG ILM STAU q H2O
45): GARNET TBi (2)PHNG ILM CHLR zo q H2O = FSP GARNET TBi (2)PHNG ILM CHLR zo q H2O																							45): FSP GARNET TBi PHNG ILM STAU q H2O = FSP GARNET TBi PHNG ILM STAU ky q H2O
46): FSP GARNET TBi (2)PHNG ILM CHLR zo q H2O = FSP GARNET TBi PHNG ILM CHLR zo q H2O																							46): FSP GARNET TBi PHNG ILM STAU ky q H2O = FSP GARNET TBi PHNG ILM ky q H2O
47): FSP GARNET TBi (2)PHNG ILM q H2O = FSP GARNET TBi (2)PHNG ILM CHLR q H2O																							47): FSP GARNET TBi PHNG ILM ky q H2O = FSP TBi PHNG ILM ky q H2O
48): FSP GARNET TBi (2)PHNG ILM q H2O = FSP GARNET TBi PHNG ILM q H2O																							48): FSP TBi (2)PHNG zo q ru H2O = FSP GARNET TBi (2)PHNG zo q ru H2O
49): FSP GARNET TBi PHNG ILM q H2O = FSP GARNET TBi PHNG ILM STAU q H2O																							49): FSP GARNET TBi (2)PHNG zo q ru H2O = FSP GARNET TBi (2)PHNG q ru H2O
50): FSP GARNET TBi PHNG ILM STAU q H2O = FSP GARNET TBi PHNG ILM STAU ky q H2O																							50): FSP GARNET TBi (2)PHNG q ru H2O = FSP GARNET TBi (2)PHNG ILM q ru H2O
51): FSP GARNET TBi PHNG ILM STAU ky q H2O = FSP GARNET TBi PHNG ILM ky q H2O																							51): FSP GARNET TBi (2)PHNG ILM q ru H2O = FSP GARNET TBi (2)PHNG ILM q H2O
52): FSP GARNET TBi PHNG ILM ky q H2O = FSP GARNET TBi PHNG ILM sill q H2O																							52): FSP GARNET TBi (2)PHNG q ru H2O = FSP GARNET TBi PHNG q ru H2O
53): GARNET TBi PHNG CHLR ab zo q sph H2O = GARNET TBi (2)PHNG CHLR ab zo q sph H2O																							53): FSP GARNET TBi PHNG q ru H2O = FSP GARNET TBi PHNG ky q ru H2O
54): GARNET TBi (2)PHNG CHLR ab zo q sph H2O = GARNET TBi (2)PHNG CHLR zo q sph H2O																							54): FSP GARNET TBi PHNG ky q ru H2O = FSP GARNET TBi PHNG ILM ky q ru H2O
55): GARNET TBi (2)PHNG CHLR zo q sph H2O = GARNET TBi (2)PHNG ILM CHLR zo q sph H2O																							55): FSP GARNET TBi PHNG ILM ky q ru H2O = FSP GARNET TBi PHNG ILM ky q H2O
56): GARNET TBi (2)PHNG ILM CHLR zo q sph H2O = GARNET TBi (2)PHNG ILM CHLR zo q H2O																							56): TBi (2)PHNG CHLR ab q ru sph H2O = TBi (2)PHNG CHLR q ru sph H2O
57): GARNET TBi (2)PHNG ILM CHLR zo q H2O = GARNET TBi (2)PHNG ILM zo q H2O																							57): TBi (2)PHNG CHLR q ru sph H2O = TBi (2)PHNG q ru sph H2O
58): GARNET TBi (2)PHNG ILM zo q H2O = FSP GARNET TBi (2)PHNG ILM zo q H2O																							58): TBi (2)PHNG q ru sph H2O = TBi (2)PHNG ab q ru sph H2O
59): FSP GARNET TBi (2)PHNG ILM zo q H2O = FSP GARNET TBi (2)PHNG ILM CHLR q H2O																							59): FSP TBi (2)PHNG ILM zo q ru H2O = FSP TBi (2)PHNG ILM CHLR q ru H2O
60): FSP GARNET TBi PHNG ILM q ru H2O = FSP GARNET TBi PHNG ILM q H2O																							60): FSP TBi (2)PHNG ILM q ru H2O = FSP GARNET TBi (2)PHNG ILM q ru H2O
61): FSP GARNET TBi PHNG ILM q ru H2O = FSP GARNET TBi PHNG ILM STAU q ru H2O																							61): FSP TBi PHNG ILM STAU ky q H2O = FSP GARNET TBi PHNG ILM STAU ky q H2O
62): FSP GARNET TBi PHNG ILM STAU q ru H2O = FSP GARNET TBi PHNG ILM STAU q H2O																							62): FSP GARNET TBi PHNG ILM sill q H2O = FSP TBi PHNG ILM sill q H2O
63): FSP GARNET TBi (2)PHNG ILM zo q H2O = FSP GARNET TBi (2)PHNG ILM zo q ru H2O																							63): FSP GARNET TBi PHNG ILM sill q H2O = FSP GARNET TBi PHNG ILM ky q H2O
64): FSP GARNET TBi (2)PHNG ILM zo q ru H2O = FSP GARNET TBi (2)PHNG ILM q ru H2O																							64): TBi PHNG CHLR ab q ru sph H2O = TBi PHNG CHLR ab zo q ru H2O
65): FSP GARNET TBi (2)PHNG ILM q ru H2O = FSP GARNET TBi (2)PHNG q ru H2O																							65): TBi PHNG CHLR ab zo q ru H2O = FSP TBi PHNG CHLR ab q ru H2O
66): FSP GARNET TBi (2)PHNG q ru H2O = FSP GARNET TBi PHNG q ru H2O																							66): TBi (2)PHNG CHLR ab zo q ru H2O = TBi PHNG CHLR ab zo q ru H2O
67): FSP GARNET TBi PHNG q ru H2O = FSP GARNET TBi PHNG ky q ru H2O																							67): TBi (2)PHNG CHLR ab zo q ru H2O = TBi PHNG CHLR ab zo q ru H2O
68): FSP GARNET TBi PHNG ky q ru H2O = FSP GARNET TBi PHNG sill q ru H2O																							68): TBi (2)PHNG ab q ru sph H2O = TBi (2)PHNG CHLR ab zo q ru H2O
69): FSP GARNET TBi PHNG sill q ru H2O = FSP GARNET TBi PHNG ILM sill q ru H2O																							69): FSP TBi (2)PHNG ILM STAU q H2O = FSP TBi (2)PHNG ILM STAU sill q H2O
70): FSP GARNET TBi PHNG ILM sill q ru H2O = FSP GARNET TBi PHNG ILM sill q H2O																							70): FSP TBi (2)PHNG ILM STAU sill q H2O = FSP TBi PHNG ILM STAU sill q H2O
71): GARNET TBi (2)PHNG CHLR zo q sph H2O = GARNET TBi (2)PHNG CHLR zo q ru H2O																							71): (2)FSP TBi PHNG ILM sill q ru H2O = (2)FSP TBi PHNG sill q ru H2O
72): GARNET TBi (2)PHNG CHLR zo q ru H2O = GARNET TBi (2)PHNG ILM CHLR zo q ru H2O																							72): FSP GARNET TBi PHNG ILM STAU q H2O = FSP TBi PHNG ILM STAU q H2O
73): GARNET TBi (2)PHNG ILM CHLR zo q ru H2O = GARNET TBi (2)PHNG ILM CHLR zo q H2O																							73): FSP TBi (2)PHNG ILM zo q ru H2O = FSP GARNET TBi (2)PHNG ILM zo q ru H2O
74): GARNET TBi (2)PHNG ILM zo q ru H2O = GARNET TBi (2)PHNG ILM zo q H2O																							74): FSP GARNET TBi (2)PHNG ILM zo q ru H2O = FSP GARNET TBi (2)PHNG ILM q ru H2O
75): GARNET TBi (2)PHNG ILM zo q ru H2O = GARNET TBi (2)PHNG ILM ab zo q ru H2O																							75): FSP GARNET TBi PHNG q ru H2O = FSP GARNET TBi PHNG STAU q ru H2O
76): GARNET TBi (2)PHNG ILM ab zo q ru H2O = FSP GARNET TBi (2)PHNG ILM zo q ru H2O																							76): FSP GARNET TBi PHNG STAU q ru H2O = FSP GARNET TBi PHNG STAU ky q ru H2O
77): FSP GARNET TBi (2)PHNG ILM zo q ru H2O = FSP GARNET TBi (2)PHNG zo q ru H2O																							77): FSP GARNET TBi PHNG STAU ky q ru H2O = FSP GARNET TBi PHNG ky q ru H2O
78): FSP GARNET TBi (2)PHNG zo q ru H2O = FSP GARNET TBi (2)PHNG q ru H2O																							78): FSP GARNET TBi (2)PHNG ILM q ru H2O = FSP GARNET TBi (2)PHNG ILM STAU q H2O
79): GARNET TBi (2)PHNG CHLR zo q ru H2O = GARNET TBi (2)PHNG zo q ru H2O																							79): FSP TBi PHNG ILM CHLR ab q ru H2O = FSP TBi (2)PHNG ILM CHLR q ru H2O
80): GARNET TBi (2)PHNG zo q ru H2O = GARNET TBi (2)PHNG ab zo q ru H2O																							80): FSP TBi (2)PHNG ILM STAU sill q H2O = FSP TBi (2)PHNG ILM sill q H2O
81): GARNET TBi (2)PHNG ab zo q ru H2O = FSP GARNET TBi (2)PHNG zo q ru H2O																							81): FSP TBi (2)PHNG ILM sill q H2O = FSP TBi PHNG ILM sill q H2O
82): GARNET (2)PHNG CHLR ab zo q sph H2O = GARNET TBi (2)PHNG CHLR ab zo q sph H2O																							82): TBi (2)PHNG CHLR ab zo q ru H2O = TBi (2)PHNG ab zo q ru H2O
83): GARNET TBi (2)PHNG zo q ru H2O = GARNET TBi (2)PHNG zo q ru sph H2O																							83): FSP TBi (2)PHNG ILM zo q ru H2O = FSP GARNET TBi (2)PHNG zo q ru H2O
84): GARNET TBi (2)PHNG zo q ru sph H2O = GARNET TBi (2)PHNG ab zo q ru H2O																							84): FSP TBi (2)PHNG ILM zo q ru H2O = FSP GARNET TBi (2)PHNG zo q ru H2O
85): GARNET PHNG CHLR ab zo q sph H2O = GARNET TBi PHNG CHLR ab zo q sph H2O																							85): FSP TBi (2)PHNG ILM zo q ru H2O = FSP GARNET TBi (2)PHNG zo q ru H2O
86): GARNET (2)PHNG CHLR ab zo q sph H2O = GARNET PHNG CHLR ab zo q sph H2O																							86): FSP GARNET TBi (2)PHNG ILM zo q ru H2O = FSP TBi (2)PHNG ILM zo q ru H2O
87): FSP GARNET TBi (2)PHNG ILM q ru H2O = FSP GARNET TBi (2)PHNG ILM q H2O																							87): FSP GARNET TBi (2)PHNG zo q ru H2O = FSP GARNET TBi (2)PHNG ILM zo q ru H2O
88): FSP GARNET TBi (2)PHNG ILM q ru H2O = FSP GARNET TBi (2)PHNG ILM q H2O																							88): FSP TBi (2)PHNG ILM and q H2O = FSP TBi (2)PHNG ILM STAU and q H2O
89): FSP GARNET TBi PHNG q ru H2O = FSP GARNET TBi PHNG ILM q ru H2O																							89): FSP TBi (2)PHNG ILM STAU sill q H2O = FSP TBi (2)PHNG ILM STAU and q H2O
90): FSP GARNET TBi PHNG ILM ky q H2O = FSP GARNET TBi PHNG ILM ky q ru H2O																							90): FSP TBi PHNG CHLR ab q ru H2O = FSP TBi (2)PHNG CHLR ab q ru H2O
91): FSP GARNET TBi PHNG ky q ru H2O = FSP GARNET TBi PHNG ILM ky q ru H2O																							91): FSP TBi (2)PHNG CHLR ab q ru H2O = FSP TBi (2)PHNG CHLR q ru H2O
92): FSP GARNET TBi PHNG ILM CHLR ab q sph H2O = FSP TBi PHNG ILM CHLR q sph H2O																							92): TBi PHNG CHLR ab zo q ru H2O = TBi (2)PHNG ab zo q ru H2O
93): TBi PHNG ILM CHLR ab zo q sph H2O = FSP TBi PHNG ILM CHLR zo q sph H2O																							93): FSP TBi (2)PHNG ILM zo q ru H2O = FSP GARNET TBi (2)PHNG ILM q ru H2O
94): GARNET TBi PHNG ILM CHLR ab zo q H2O = FSP GARNET TBi PHNG ILM CHLR zo q H2O																							94): FSP GARNET TBi (2)PHNG q ru H2O = FSP GARNET TBi (2)PHNG STAU q ru H2O
95): FSP GARNET TBi (2)PHNG ILM zo q H2O = FSP GARNET TBi PHNG ILM CHLR zo q H2O																							95): FSP GARNET TBi (2)PHNG STAU q ru H2O = FSP GARNET TBi PHNG STAU q ru H2O
96): FSP GARNET TBi (2)PHNG ILM q H2O = FSP GARNET TBi (2)PHNG ILM STAU q H2O																							96): FSP GARNET TBi PHNG ILM STAU q H2O = FSP GARNET TBi PHNG ILM STAU q ru H2O
97): FSP GARNET TBi (2)PHNG ILM zo q H2O = FSP GARNET TBi (2)PHNG ILM q H2O																							97): FSP GARNET TBi PHNG STAU q ru H2O = FSP GARNET TBi PHNG ILM STAU q ru H2O
98): GARNET TBi (2)PHNG ILM CHLR zo q sph H2O = GARNET TBi (2)PHNG ILM CHLR zo q ru H2O																							98): FSP GARNET TBi (2)PHNG ILM zo q ru H2O = FSP GARNET TBi (2)PHNG zo q ru H2O
99): GARNET TBi (2)PHNG zo q ru H2O = GARNET TBi (2)PHNG ILM zo q ru H2O																							99): FSP TBi (2)PHNG ILM STAU q H2O = FSP TBi (2)PHNG ILM STAU and q H2O
100): GARNET TBi (2)PHNG ILM zo q H2O = GARNET TBi (2)PHNG ILM ab zo q H2O																							100): FSP TBi (2)PHNG ILM zo q ru H2O = FSP GARNET TBi (2)PHNG ILM zo q ru H2O
101): GARNET TBi (2)PHNG ILM ab zo q H2O = FSP GARNET TBi (2)PHNG ILM zo q H2O																							101): FSP GARNET TBi (2)PHNG ILM zo q ru H2O = FSP GARNET TBi (2)PHNG ILM q ru H2O
102): FSP GARNET TBi (2)PHNG ILM q ru H2O = FSP GARNET TBi (2)PHNG ILM q H2O																							102): FSP GARNET TBi (2)PHNG q ru H2O = FSP GARNET TBi PHNG ILM STAU q ru H2O
103): FSP GARNET TBi PHNG ILM CHLR ab q sph H2O = FSP TBi PHNG ILM CHLR ab q sph H2O																							103): FSP GARNET TBi PHNG ILM STAU q ru H2O = FSP GARNET TBi PHNG ILM STAU ky q H2O
104): FSP GARNET TBi PHNG ILM CHLR ab q sph H2O = FSP TBi PHNG ILM CHLR ab q sph H2O																							104): FSP TBi (2)PHNG ILM zo q ru H2O = FSP GARNET TBi (2)PHNG ILM zo q ru H2O
105): FSP GARNET TBi PHNG ILM CHLR STAU q H2O = FSP GARNET TBi (2)PHNG ILM CHLR STAU q H2O																							105): FSP GARNET TBi (2)PHNG ILM zo q ru H2O = FSP GARNET TBi (2)PHNG zo q ru H2O
106): FSP GARNET TBi PHNG CHLR ab q sph H2O = FSP GARNET TBi PHNG ILM CHLR q sph H2O																							106): FSP TBi (2)PHNG ILM sill q H2O = FSP TBi (2)PHNG ILM and q H2O
107): GARNET TBi PHNG ILM CHLR ab zo q sph H2O = GARNET TBi PHNG ILM CHLR ab zo q H2O																							107): FSP TBi PHNG ILM sill q ru H2O = (2)FSP TBi PHNG sill q ru H2O
108): FSP GARNET TBi (2)PHNG ILM zo q H2O = FSP GARNET TBi (2)PHNG ILM CHLR zo q H2O																							108): FSP TBi (2)PHNG ILM zo q ru H2O = FSP GARNET TBi (2)PHNG ILM q ru H2O
109): FSP GARNET TBi (2)PHNG ILM q ru H2O = FSP GARNET TBi PHNG ILM q ru H2O																							109): FSP GARNET TBi (2)PHNG ILM q ru H2O = FSP GARNET TBi PHNG ILM STAU q ru H2O
110): FSP GARNET TBi PHNG ILM ky q ru H2O = FSP GARNET TBi PHNG ILM sill q ru H2O																							110): FSP GARNET TBi PHNG ILM STAU q ru H2O = FSP GARNET TBi PHNG ILM ky q ru H2O
111): GARNET TBi (2)PHNG ILM CHLR zo q ru H2O = GARNET TBi (2)PHNG ILM zo q ru H2O																							111): FSP GARNET TBi PHNG STAU ky q ru H2O = FSP GARNET TBi PHNG ILM ky q ru H2O
112): GARNET TBi (2)PHNG ILM ab zo q ru H2O = GARNET TBi (2)PHNG ILM ab zo q H2O																							112): FSP GARNET TBi (2)PHNG q ru H2O = FSP GARNET TBi PHNG STAU q ru H2O
113): GARNET TBi (2)PHNG ab zo q ru H2O = GARNET TBi (2)PHNG ILM ab zo q ru H2O																							113): FSP GARNET TBi PHNG STAU q ru H2O = FSP GARNET TBi PHNG ky q ru H2O
114): FSP GARNET TBi PHNG ILM CHLR STAU q H2O = FSP GARNET TBi (2)PHNG ILM STAU q H2O																							114): FSP TBi PHNG ILM CHLR ab q ru H2O = FSP TBi (2)PHNG CHLR ab q ru H2O
115): FSP GARNET TBi PHNG CHLR ab q sph H2O = FSP TBi PHNG ILM CHLR ab q sph H2O																							115): FSP TBi (2)PHNG CHLR ab q ru H2O = FSP TBi (2)PHNG CHLR q ru H2O
116): GARNET TBi PHNG ILM CHLR ab zo q sph H2O = FSP GARNET TBi PHNG ILM CHLR zo q sph H2O																							116): FSP TBi (2)PHNG ILM STAU q H2O = FSP TBi (2)PHNG ILM and q H2O
117): FSP GARNET TBi PHNG ILM CHLR q sph H2O = FSP TBi PHNG ILM CHLR q sph H2O																							117): FSP TBi (2)PHNG ILM STAU sill q H2O = FSP TBi PHNG ILM sill q H2O
118): GARNET TBi PHNG ILM CHLR ab zo q sph H2O = GARNET TBi (2)PHNG ILM CHLR zo q H2O																							118): FSP TBi PHNG ILM STAU ky q H2O = FSP GARNET TBi PHNG ILM ky q H2O
119): GARNET TBi PHNG ILM CHLR ab zo q sph H2O = TBi PHNG ILM CHLR ab zo q H2O																							119): FSP GARNET TBi (2)PHNG ILM q ru H2O = FSP GARNET TBi PHNG ILM STAU q ru H2O
120): FSP GARNET TBi (2)PHNG ILM zo q H2O = FSP GARNET TBi (2)PHNG ILM CHLR q H2O																							120): FSP GARNET TBi (2)PHNG ILM STAU q ru H2O = FSP GARNET TBi PHNG ILM STAU q ru H2O
121): FSP GARNET TBi (2)PHNG ILM CHLR zo q H2O = FSP GARNET TBi (2)PHNG ILM CHLR q H2O																							121): FSP GARNET TBi (2)PHNG ILM q ru H2O = FSP GARNET TBi (2)PHNG ILM STAU q ru H2O
122): FSP GARNET TBi (2)PHNG ILM zo q H2O = FSP GARNET TBi (2)PHNG ILM CHLR zo q H2O																							122): FSP GARNET TBi (2)PHNG ILM STAU q ru H2O = FSP GARNET TBi PHNG ILM STAU q ru H2O
123): FSP GARNET TBi PHNG ILM q ru H2O = FSP GARNET TBi PHNG ILM ky q ru H2O																							123): FSP GARNET TBi (2)PHNG q ru H2O = FSP GARNET TBi (2)PHNG ILM STAU q ru H2O
124): FSP GARNET TBi PHNG CHLR ab q sph H2O = FSP TBi PHNG ILM CHLR ab q sph H2O																							124): FSP GARNET TBi PHNG STAU q ru H2O = FSP GARNET TBi PHNG ILM ky q ru H2O
125): FSP GARNET TBi PHNG CHLR ab q sph H2O = FSP TBi PHNG ILM CHLR ab q sph H2O																							125): FSP TBi (2)PHNG ILM zo q ru H2O = FSP GARNET TBi (2)PHNG ILM zo q ru H2O
126): FSP GARNET TBi (2)PHNG ILM CHLR STAU q H2O = FSP GARNET TBi (2)PHNG ILM STAU q H2O																							126): FSP GARNET TBi (2)PHNG ILM zo q ru H2O = FSP GARNET TBi (2)PHNG zo q ru H2O
127): FSP GARNET TBi PHNG ILM CHLR STAU q H2O = FSP GARNET TBi (2)PHNG ILM CHLR STAU q H2O																							127): FSP GARNET TBi (2)PHNG q ru H2O = FSP GARNET TBi PHNG STAU q ru H2O
128): FSP GARNET TBi PHNG ILM STAU ky q H2O = FSP GARNET TBi PHNG ILM STAU sill q H2O																							128): FSP GARNET TBi (2)PHNG STAU q ru H2O = FSP GARNET TBi PHNG STAU q ru H2O
129): (2)FSP GARNET TBi PHNG ILM sill q H2O = (2)FSP TBi PHNG ILM sill q H2O																							129): FSP GARNET TBi (2)PHNG q ru H2O = FSP GARNET TBi (2)PHNG STAU q ru H2O
130): FSP GARNET TBi PHNG CHLR ab q sph H2O = FSP GARNET TBi PHNG ILM CHLR ab q sph H2O
131): FSP GARNET TBi PHNG ILM CHLR ab q sph H2O = FSP GARNET TBi PHNG ILM CHLR q sph H2O
132): FSP GARNET TBi PHNG ILM CHLR q sph H2O = FSP TBi PHNG ILM CHLR zo q sph H2O
133): GARNET TBi (2)PHNG CHLR ab zo q sph H2O = GARNET TBi (2)PHNG ILM CHLR zo q sph H2O
134): FSP GARNET TBi (2)PHNG ILM CHLR q H2O = FSP GARNET TBi (2)PHNG ILM STAU q H2O
135): GARNET TBi PHNG ILM CHLR ab zo q sph H2O = GARNET TBi (2)PHNG ILM CHLR ab zo q H2O
136): FSP GARNET TBi PHNG ILM STAU q ru H2O = FSP GARNET TBi PHNG ILM ky q ru H2O
137): GARNET TBi (2)PHNG CHLR zo q sph H2O = GARNET TBi (2)PHNG ILM CHLR zo q ru H2O
138): FSP GARNET TBi PHNG ILM CHLR STAU q H2O = FSP GARNET TBi (2)PHNG ILM STAU q H2O
139): TBi PHNG CHLR ab zo q sph H2O = FSP GARNET TBi PHNG CHLR ab q sph H2O
140): GARNET TBi PHNG CHLR ab zo q sph H2O = FSP GARNET TBi PHNG ILM CHLR q sph H2O
141): TBi PHNG ILM CHLR ab zo q sph H2O = FSP TBi PHNG ILM CHLR zo q H2O
142): FSP GARNET TBi PHNG CHLR ab q sph H2O = FSP TBi PHNG ILM CHLR ab q sph H2O
143): FSP GARNET TBi PHNG ILM CHLR ab q sph H2O = FSP TBi PHNG ILM CHLR ab q sph H2O
144): FSP GARNET TBi PHNG CHLR ab q sph H2O = FSP GARNET TBi PHNG ILM CHLR ab q sph H2O
145): GARNET TBi PHNG ILM CHLR ab zo q sph H2O = GARNET TBi (2)PHNG ILM CHLR zo q sph H2O
146): TBi PHNG ILM CHLR ab zo q H2O = FSP GARNET TBi PHNG ILM CHLR zo q H2O
147): GARNET TBi (2)PHNG ILM CHLR zo q H2O = FSP GARNET TBi (2)PHNG ILM zo q H2O
148): FSP GARNET TBi (2)PHNG ILM zo q ru H2O = FSP GARNET TBi (2)PHNG q ru H2O
149): FSP GARNET TBi PHNG CHLR ab q sph H2O = FSP GARNET TBi PHNG ILM CHLR ab q sph H2O
150): FSP GARNET TBi PHNG ILM CHLR ab q sph H2O = FSP TBi PHNG ILM CHLR ab q sph H2O
151): FSP GARNET TBi PHNG CHLR ab q sph H2O = FSP TBi PHNG ILM CHLR ab q sph H2O
152): FSP GARNET TBi PHNG ILM CHLR q H2O = FSP GARNET TBi (2)PHNG ILM CHLR STAU q H2O
153): FSP GARNET TBi PHNG ILM STAU ky q H2O = FSP GARNET TBi PHNG ILM sill q H2O
154): (2)FSP GARNET TBi PHNG ILM sill q H2O = (2)FSP TBi ILM sill q H2O
155): FSP TBi PHNG CHLR ab zo q sph H2O = FSP TBi PHNG CHLR ab q sph H2O
156): TBi PHNG CHLR ab zo q sph H2O = FSP TBi PHNG CHLR ab zo q sph H2O
157): FSP GARNET TBi PHNG CHLR ab q sph H2O = FSP GARNET TBi PHNG ILM CHLR q sph H2O
158): GARNET TBi PHNG ILM CHLR ab zo q sph H2O = FSP TBi PHNG ILM CHLR zo q sph H2O
159): FSP GARNET TBi (2)PHNG ILM q H2O = FSP GARNET TBi PHNG ILM STAU q H2O
160): GARNET TBi (2)PHNG ILM CHLR ab zo q H2O = FSP GARNET TBi (2)PHNG ILM CHLR zo q H2O
161): FSP GARNET TBi PHNG ILM STAU q ru H2O = FSP GARNET TBi PHNG ILM STAU ky q H2O
162): GARNET TBi (2)PHNG ab zo q ru H2O = FSP GARNET TBi (2)PHNG ILM zo q ru H2O

[truncated: 28 more sheets: B50_4-p, B50_4-d, B50_6-p, B50_6-d, B50_8-p, B50_8-d, hiT5_1-p, hiT5_1-d, hiT5_4-p, hiT5_4-d, hiT5_6-p, hiT5_6-d, hiT5_8-p, hiT5_8-d, hiT5-4_dp, hiT5-6_dp, hiT5-8_dp, hiT50_1-p, hiT50_1-d, hiT50-4_p …]
