# Supplementary material
Source: MDPI journal article supplement (https://www.mdpi.com/2076-3263/11/12/505)
Supplement: s1 [file s1 › S5_CMM theria-g.xlsx]

## Sheet: Path trajectories
Table S5.1. Path 1 Trajectory for CMM Theria_G Modeling.
T (oC	P (bar)	t (my)
440	3500	0
520	5500	4.44444
560	6500	6.66667
590	7500	8.33333
595	7600	8.88889
600	7200	9.16667
580	5200	10.5556
575	4700	10.8333
550	3700	12.2222
500	3300	15
450	3000	17.7778
Table S5.2. Path 2 Trajectory for CMM Theria_G Modeling.
T (oC	P (bar)	t (my)
500	6000	0
550	6600	2.77778
560	6800	3.33333
590	7500	5
595	7500	5.27778
610	7900	6.11111
630	8300	7.22222
650	8500	8.33333
675	8300	9.72222
685	7500	10.2778
680	6000	10.5556
675	5500	10.8333
650	4500	12.2222
550	3500	17.7778
500	3300	20.5556
450	3000	23.3333
Table S5.3. Path 3 Trajectory for CMM Theria_G Modeling.
T (oC	P (bar)	t (my)
500	6000	0
550	6600	2.77778
560	6800	3.33333
590	7900	5
595	8200	5.27778
610	9000	6.11111
630	10000	7.22222
650	10500	8.33333
675	9800	9.72222
685	8500	10.2778
680	6000	10.5556
675	5500	10.8333
650	4500	12.2222
550	3500	17.7778
500	3300	20.5556
450	3000	23.3333
Table S5.4. CSD for CMM Theria_G Modeling.
	# of grts per radius class (grt/ccm)	radius
class 1	0.5	2000
class 2	2	1750
class 3	3	1500
class 4	1	1250
class 5	0.8	1000
class 6	0.5	750
class 7	0.5	500
class 8	0.3	250

## Sheet: Baynidir Path1
Baynidir Path 1_1: Primary										Baynidir Path 1_1: Diffused
Shell	temperature (｡C)	pressure (bar)	tot.time (my)	radius (cm)	X(node) (cm)	Xfe	Xmg	Xmn	Xca	Shell	temperature (｡C)	pressure (bar)	tot.time (my)	radius (cm)	X(node) (cm)	Xfe	Xmg	Xmn	Xca
1	536.893	5922.32	0	0.00257541	0.0012877	0.629193	0.0504993	0.169694	0.150614	1	450	3000	12.3949	0.00257541	0.0012877	0.629216	0.0505002	0.16967	0.150613
2	536.893	5922.33	1.35638e-05	0.00354683	0.00306112	0.629194	0.0504995	0.169693	0.150613	2	450	3000	12.3949	0.00354683	0.00306112	0.629221	0.0505006	0.169666	0.150613
3	536.894	5922.34	4.34043e-05	0.00452485	0.00403584	0.629197	0.0504999	0.169691	0.150613	3	450	3000	12.3949	0.00452485	0.00403584	0.629226	0.0505012	0.16966	0.150612
4	536.894	5922.36	8.95214e-05	0.00552963	0.00502724	0.6292	0.0505005	0.169687	0.150612	4	450	3000	12.3949	0.00552963	0.00502724	0.629233	0.050502	0.169653	0.150611
5	536.896	5922.39	0.000157341	0.00650776	0.00601869	0.629206	0.0505014	0.169681	0.150611	5	450	3000	12.3949	0.00650776	0.00601869	0.629243	0.0505032	0.169644	0.15061
6	536.897	5922.43	0.000252287	0.00753323	0.0070205	0.629214	0.0505027	0.169674	0.150609	6	450	3000	12.3949	0.00753323	0.0070205	0.629255	0.0505047	0.169632	0.150608
7	536.9	5922.49	0.000374362	0.00850956	0.00802139	0.629224	0.0505044	0.169664	0.150607	7	450	3000	12.3949	0.00850956	0.00802139	0.62927	0.0505066	0.169618	0.150606
8	536.902	5922.56	0.00052899	0.00949999	0.00900477	0.629237	0.0505065	0.169652	0.150605	8	450	3000	12.3949	0.00949999	0.00900477	0.629287	0.0505089	0.169601	0.150603
9	536.906	5922.65	0.000721596	0.0105025	0.0100012	0.629253	0.0505091	0.169636	0.150601	9	450	3000	12.3949	0.0105025	0.0100012	0.629308	0.0505118	0.169581	0.1506
10	536.91	5922.75	0.000957607	0.0115029	0.0110027	0.629273	0.0505124	0.169617	0.150597	10	450	3000	12.3949	0.0115029	0.0110027	0.629332	0.0505152	0.169557	0.150596
11	536.915	5922.88	0.00123702	0.0124944	0.0119986	0.629297	0.0505162	0.169595	0.150592	11	450	3000	12.3949	0.0124944	0.0119986	0.62936	0.0505193	0.16953	0.150591
12	536.921	5923.02	0.00156527	0.0134869	0.0129906	0.629324	0.0505207	0.169569	0.150587	12	450	3000	12.3949	0.0134869	0.0129906	0.629393	0.050524	0.169499	0.150585
13	536.928	5923.2	0.00194777	0.0144857	0.0139863	0.629356	0.0505259	0.169538	0.15058	13	450	3000	12.3949	0.0144857	0.0139863	0.629429	0.0505295	0.169463	0.150578
14	536.936	5923.4	0.00238995	0.0154947	0.0149902	0.629393	0.050532	0.169502	0.150572	14	450	3000	12.3949	0.0154947	0.0149902	0.629471	0.0505358	0.169423	0.15057
15	536.945	5923.62	0.00289724	0.0164943	0.0159945	0.629436	0.0505389	0.169462	0.150563	15	450	3000	12.3949	0.0164943	0.0159945	0.629519	0.050543	0.169377	0.150561
16	536.955	5923.88	0.00346963	0.0174985	0.0169964	0.629484	0.0505468	0.169416	0.150553	16	450	3000	12.3949	0.0174985	0.0169964	0.629572	0.050551	0.169326	0.150551
17	536.967	5924.17	0.00410713	0.0184987	0.0179986	0.629537	0.0505555	0.169365	0.150542	17	450	3000	12.3949	0.0184987	0.0179986	0.62963	0.05056	0.16927	0.15054
18	536.98	5924.49	0.00482602	0.0195026	0.0190006	0.629597	0.0505653	0.169308	0.15053	18	450	3000	12.3949	0.0195026	0.0190006	0.629696	0.0505701	0.169207	0.150527
19	536.994	5924.85	0.00562086	0.020507	0.0200048	0.629664	0.0505762	0.169244	0.150516	19	450	3000	12.3949	0.020507	0.0200048	0.629768	0.0505813	0.169138	0.150513
20	537.01	5925.24	0.00649708	0.0215093	0.0210082	0.629738	0.0505882	0.169173	0.150501	20	450	3000	12.3949	0.0215093	0.0210082	0.629847	0.0505936	0.169061	0.150498
21	537.027	5925.68	0.00746011	0.0225115	0.0220104	0.629818	0.0506014	0.169096	0.150484	21	450	3000	12.3949	0.0225115	0.0220104	0.629935	0.0506071	0.168977	0.150481
22	537.046	5926.15	0.00850995	0.0235088	0.0230101	0.629906	0.0506158	0.169012	0.150466	22	450	3000	12.3949	0.0235088	0.0230101	0.63003	0.0506218	0.168885	0.150463
23	537.067	5926.66	0.00965203	0.0245072	0.024008	0.630002	0.0506315	0.168921	0.150446	23	450	3000	12.3949	0.0245072	0.024008	0.630135	0.0506379	0.168784	0.150443
24	537.089	5927.22	0.0108918	0.025506	0.0250066	0.630106	0.0506485	0.168821	0.150425	24	450	3000	12.3949	0.025506	0.0250066	0.630251	0.0506554	0.168672	0.150421
25	537.113	5927.83	0.0122346	0.0265023	0.0260042	0.630218	0.0506669	0.168714	0.150401	25	450	3000	12.3949	0.0265023	0.0260042	0.630379	0.0506746	0.16855	0.150397
26	537.139	5928.49	0.0137022	0.027502	0.0270022	0.630341	0.0506871	0.168596	0.150376	26	450	3000	12.3949	0.027502	0.0270022	0.630519	0.0506956	0.168414	0.150371
27	537.169	5929.22	0.0153271	0.0285029	0.0280025	0.630477	0.0507094	0.168466	0.150348	27	450	3000	12.3949	0.0285029	0.0280025	0.630675	0.0507189	0.168264	0.150343
28	537.201	5930.03	0.0171257	0.0295008	0.0290019	0.630628	0.0507341	0.168321	0.150316	28	450	3000	12.3949	0.0295008	0.0290019	0.630847	0.0507447	0.168097	0.150311
29	537.237	5930.93	0.0191359	0.0305019	0.0300014	0.630796	0.0507617	0.16816	0.150282	29	450	3000	12.3949	0.0305019	0.0300014	0.631039	0.0507735	0.167913	0.150275
30	537.278	5931.94	0.0213793	0.0315008	0.0310013	0.630985	0.0507926	0.16798	0.150243	30	450	3000	12.3949	0.0315008	0.0310013	0.631251	0.0508055	0.167708	0.150236
31	537.323	5933.07	0.0238886	0.0325018	0.0320013	0.631195	0.0508271	0.167779	0.150199	31	450	3000	12.3949	0.0325018	0.0320013	0.631485	0.0508413	0.167482	0.150192
32	537.373	5934.33	0.0266855	0.033501	0.0330014	0.631429	0.0508656	0.167554	0.150151	32	450	3000	12.3949	0.033501	0.0330014	0.631745	0.050881	0.167231	0.150143
33	537.429	5935.73	0.0298025	0.0345015	0.0340012	0.631691	0.0509085	0.167304	0.150097	33	450	3000	12.3949	0.0345015	0.0340012	0.632032	0.0509252	0.166955	0.150088
34	537.492	5937.29	0.0332613	0.035501	0.0350013	0.631981	0.0509562	0.167026	0.150037	34	450	3000	12.3949	0.035501	0.0350013	0.632348	0.0509742	0.16665	0.150027
35	537.56	5939.01	0.0370944	0.0365031	0.0360021	0.632302	0.0510091	0.166718	0.149971	35	450	3000	12.3949	0.0365031	0.0360021	0.632697	0.0510285	0.166315	0.14996
36	537.637	5940.92	0.041329	0.0375023	0.0370027	0.632657	0.0510676	0.166378	0.149898	36	450	3000	12.3949	0.0375023	0.0370027	0.633078	0.0510883	0.165947	0.149887
37	537.72	5943.01	0.0459814	0.0385023	0.0380023	0.633047	0.0511319	0.166004	0.149817	37	450	3000	12.3949	0.0385023	0.0380023	0.633496	0.051154	0.165545	0.149806
38	537.812	5945.31	0.0510841	0.0395028	0.0390025	0.633475	0.0512026	0.165593	0.149729	38	450	3000	12.3949	0.0395028	0.0390025	0.633951	0.051226	0.165106	0.149717
39	537.913	5947.82	0.0566643	0.0405026	0.0400027	0.633943	0.0512799	0.165144	0.149633	39	450	3000	12.3949	0.0405026	0.0400027	0.634447	0.0513048	0.164629	0.14962
40	538.022	5950.55	0.0627436	0.041503	0.0410028	0.634452	0.0513643	0.164655	0.149529	40	450	3000	12.3949	0.041503	0.0410028	0.634984	0.0513906	0.164111	0.149515
41	538.141	5953.52	0.0693438	0.0425029	0.042003	0.635006	0.0514561	0.164123	0.149415	41	450	3000	12.3949	0.0425029	0.042003	0.635566	0.0514838	0.16355	0.149401
42	538.27	5956.74	0.0764919	0.0435034	0.0430032	0.635606	0.0515556	0.163546	0.149292	42	450	3000	12.3949	0.0435034	0.0430032	0.636193	0.0515848	0.162945	0.149277
43	538.409	5960.22	0.0842152	0.0445036	0.0440035	0.636253	0.0516634	0.162923	0.14916	43	450	3000	12.3949	0.0445036	0.0440035	0.636869	0.0516939	0.162293	0.149144
44	538.558	5963.96	0.0925244	0.0455032	0.0450034	0.636951	0.0517796	0.162253	0.149017	44	450	3000	12.3949	0.0455032	0.0450034	0.637595	0.0518116	0.161593	0.149001
45	538.719	5967.97	0.101447	0.0465028	0.046003	0.637699	0.0519046	0.161532	0.148865	45	450	3000	12.3949	0.0465028	0.046003	0.638371	0.051938	0.160843	0.148848
46	538.891	5972.27	0.111004	0.0475026	0.0470027	0.638501	0.0520388	0.160759	0.148701	46	450	3000	12.3949	0.0475026	0.0470027	0.639202	0.0520737	0.160041	0.148684
47	539.075	5976.87	0.121217	0.0485027	0.0480026	0.639358	0.0521825	0.159933	0.148527	47	450	3000	12.3949	0.0485027	0.0480026	0.640087	0.0522189	0.159185	0.148509
48	539.271	5981.77	0.132104	0.0495025	0.0490026	0.640271	0.0523361	0.159051	0.148341	48	450	3000	12.3949	0.0495025	0.0490026	0.64103	0.052374	0.158273	0.148323
49	539.479	5986.97	0.143679	0.0505024	0.0500025	0.641243	0.0524999	0.158113	0.148145	49	450	3000	12.3949	0.0505024	0.0500025	0.642032	0.0525394	0.157303	0.148125
50	539.7	5992.5	0.155965	0.0515025	0.0510024	0.642274	0.0526743	0.157116	0.147936	50	450	3000	12.3949	0.0515025	0.0510024	0.643094	0.0527154	0.156274	0.147916
51	539.934	5998.36	0.168973	0.0525021	0.0520023	0.643366	0.0528595	0.156059	0.147716	51	450	3000	12.3949	0.0525021	0.0520023	0.644219	0.0529023	0.155184	0.147695
52	540.182	6004.55	0.182729	0.0535019	0.053002	0.644521	0.053056	0.15494	0.147483	52	450	3000	12.3949	0.0535019	0.053002	0.645407	0.0531006	0.15403	0.147462
53	540.444	6011.09	0.197267	0.0545023	0.0540021	0.645741	0.0532643	0.153757	0.147238	53	450	3000	12.3949	0.0545023	0.0540021	0.646662	0.0533108	0.152811	0.147216
54	540.72	6017.99	0.212608	0.055502	0.0550022	0.647029	0.053485	0.152507	0.14698	54	450	3000	12.3949	0.055502	0.0550022	0.647985	0.0535335	0.151525	0.146957
55	541.011	6025.26	0.228773	0.056502	0.056002	0.648386	0.0537185	0.151188	0.146708	55	450	3000	12.3949	0.056502	0.056002	0.649376	0.0537688	0.150169	0.146685
56	541.317	6032.92	0.24579	0.0575021	0.0570021	0.649814	0.0539653	0.149797	0.146423	56	450	3000	12.3949	0.0575021	0.0570021	0.650839	0.0540175	0.148743	0.1464
57	541.639	6040.97	0.26367	0.0585018	0.0580019	0.651315	0.0542257	0.148335	0.146125	57	450	3000	12.3949	0.0585018	0.0580019	0.652374	0.0542799	0.147245	0.146101
58	541.977	6049.41	0.28244	0.0595016	0.0590017	0.65289	0.0545003	0.146797	0.145812	58	450	3000	12.3949	0.0595016	0.0590017	0.653982	0.0545563	0.145674	0.145788
59	542.331	6058.27	0.302116	0.0605018	0.0600017	0.654541	0.0547895	0.145184	0.145485	59	450	3000	12.3949	0.0605018	0.0600017	0.655665	0.0548474	0.144026	0.145461
60	542.701	6067.53	0.322708	0.0615019	0.0610019	0.656269	0.0550938	0.143493	0.145145	60	450	3000	12.3949	0.0615019	0.0610019	0.657424	0.0551535	0.142303	0.14512
61	543.089	6077.22	0.344223	0.0625019	0.0620019	0.658074	0.0554134	0.141723	0.14479	61	450	3000	12.3949	0.0625019	0.0620019	0.659258	0.0554749	0.140502	0.144765
62	543.493	6087.32	0.366671	0.063502	0.063002	0.659956	0.0557487	0.139875	0.144421	62	450	3000	12.3949	0.063502	0.063002	0.661168	0.0558119	0.138624	0.144396
63	543.914	6097.84	0.390053	0.0645018	0.0640019	0.661916	0.0560999	0.137946	0.144038	63	450	3000	12.3949	0.0645018	0.0640019	0.663154	0.0561648	0.136669	0.144013
64	544.351	6108.78	0.414373	0.0655018	0.0650018	0.663953	0.0564675	0.135938	0.143641	64	450	3000	12.3949	0.0655018	0.0650018	0.665215	0.0565339	0.134635	0.143616
65	544.806	6120.15	0.439631	0.0665021	0.066002	0.666069	0.0568516	0.133849	0.14323	65	450	3000	12.3949	0.0665021	0.066002	0.667352	0.0569196	0.132523	0.143205
66	545.277	6131.94	0.465828	0.0675023	0.0670022	0.668261	0.0572527	0.13168	0.142806	66	450	3000	12.3949	0.0675023	0.0670022	0.669562	0.057322	0.130334	0.142781
67	545.765	6144.14	0.492943	0.0685022	0.0680023	0.670528	0.0576707	0.129432	0.142369	67	450	3000	12.3949	0.0685022	0.0680023	0.671844	0.0577412	0.12807	0.142344
68	546.27	6156.75	0.520963	0.0695021	0.0690022	0.672869	0.0581057	0.127106	0.14192	68	450	3000	12.3949	0.0695021	0.0690022	0.674196	0.0581773	0.125732	0.141895
69	546.79	6169.76	0.549878	0.0705021	0.0700021	0.675282	0.0585579	0.124703	0.141458	69	450	3000	12.3949	0.0705021	0.0700021	0.676614	0.0586303	0.123322	0.141433
70	547.327	6183.16	0.579673	0.071502	0.071002	0.677765	0.0590274	0.122224	0.140984	70	450	3000	12.3949	0.071502	0.071002	0.679096	0.0591005	0.120844	0.14096
71	547.878	6196.96	0.610324	0.0725021	0.072002	0.680316	0.0595143	0.119671	0.140499	71	450	3000	12.3949	0.0725021	0.072002	0.681638	0.0595876	0.118299	0.140475
72	548.445	6211.12	0.641806	0.0735021	0.0730021	0.682932	0.0600185	0.117046	0.140003	72	450	3000	12.3949	0.0735021	0.0730021	0.684236	0.0600917	0.115692	0.13998
73	549.026	6225.65	0.674085	0.0745022	0.0740021	0.685609	0.0605399	0.114353	0.139497	73	450	3000	12.3949	0.0745022	0.0740021	0.686884	0.0606124	0.113028	0.139476
74	549.621	6240.52	0.707129	0.0755021	0.0750021	0.688344	0.0610783	0.111595	0.138982	74	450	3000	12.3949	0.0755021	0.0750021	0.689577	0.0611493	0.11031	0.138964
75	550.229	6255.72	0.740906	0.0765022	0.0760021	0.691134	0.0616336	0.108774	0.138459	75	450	3000	12.3949	0.0765022	0.0760021	0.692302	0.0617005	0.107542	0.138455
76	550.849	6271.23	0.775372	0.0775021	0.0770021	0.693972	0.0622056	0.105895	0.137928	76	450	3000	12.3949	0.0775021	0.0770021	0.695034	0.0622603	0.104727	0.137979
77	551.481	6287.03	0.810488	0.0785022	0.0780022	0.696855	0.0627939	0.102962	0.137389	77	450	3000	12.3949	0.0785022	0.0780022	0.697712	0.0628161	0.101865	0.137607
78	551.819	6295.47	0.82925	0.0788725	0.0786874	0.698395	0.0631102	0.10139	0.137105	78	450	3000	12.3949	0.0788725	0.0786874	0.69947	0.0631867	0.0998761	0.137467
79	552.267	6306.68	0.854156	0.0798724	0.0793725	0.700251	0.0635153	0.0989582	0.137275	79	450	3000	12.3949	0.0798724	0.0793725	0.701159	0.0635484	0.0978659	0.137427
80	552.809	6320.23	0.884276	0.0808723	0.0803724	0.702491	0.0640094	0.0960257	0.137474	80	450	3000	12.3949	0.0808723	0.0803724	0.703523	0.0640655	0.0948973	0.137515
81	553.363	6334.07	0.915036	0.0818724	0.0813724	0.704767	0.064519	0.0930444	0.137669	81	450	3000	12.3949	0.0818724	0.0813724	0.705843	0.0645833	0.0918963	0.137678
82	553.927	6348.18	0.946398	0.0828726	0.0823725	0.707076	0.0650441	0.0900198	0.13786	82	450	3000	12.3949	0.0828726	0.0823725	0.708158	0.0651106	0.0888698	0.137861
83	554.502	6362.55	0.978319	0.0838726	0.0833726	0.709412	0.0655843	0.0869575	0.138046	83	450	3000	12.3949	0.0838726	0.0833726	0.710481	0.065651	0.0858232	0.138045
84	555.086	6377.14	1.01076	0.0848727	0.0843726	0.711771	0.0661394	0.0838633	0.138226	84	450	3000	12.3949	0.0848727	0.0843726	0.71281	0.0662052	0.0827612	0.138224
85	555.678	6391.95	1.04366	0.0858726	0.0853726	0.714147	0.0667089	0.0807438	0.1384	85	450	3000	12.3949	0.0858726	0.0853726	0.715141	0.0667731	0.0796888	0.138397
86	556.278	6406.95	1.07699	0.0868727	0.0863726	0.716535	0.0672926	0.077605	0.138567	86	450	3000	12.3949	0.0868727	0.0863726	0.717471	0.0673545	0.0766112	0.138564
87	556.884	6422.11	1.11068	0.0878727	0.0873727	0.718929	0.0678899	0.074454	0.138727	87	450	3000	12.3949	0.0878727	0.0873727	0.719794	0.067949	0.073534	0.138723
88	557.496	6437.41	1.14469	0.0888727	0.0883727	0.721322	0.0685002	0.0712988	0.138879	88	450	3000	12.3949	0.0888727	0.0883727	0.722106	0.068556	0.0704638	0.138875
89	558.113	6452.83	1.17894	0.0898727	0.0893727	0.723708	0.069123	0.0681462	0.139022	89	450	3000	12.3949	0.0898727	0.0893727	0.724398	0.0691746	0.0674071	0.13902
90	558.733	6468.33	1.21341	0.0908728	0.0903727	0.726081	0.0697578	0.0650041	0.139157	90	450	3000	12.3949	0.0908728	0.0903727	0.726662	0.0698029	0.0643702	0.139165
91	559.356	6483.9	1.248	0.0918728	0.0913728	0.728432	0.0704037	0.0618807	0.139283	91	450	3000	12.3949	0.0918728	0.0913728	0.728876	0.0704353	0.0613599	0.139329
92	559.98	6499.51	1.28267	0.0928728	0.0923728	0.730756	0.0710601	0.0587837	0.1394	92	450	3000	12.3949	0.0928728	0.0923728	0.731006	0.0710591	0.0583823	0.139552
93	560.553	6518.45	1.31452	0.0938728	0.0933728	0.732831	0.071645	0.0557106	0.139813	93	450	3000	12.3949	0.0938728	0.0933728	0.733028	0.0716625	0.0554437	0.139866
94	561.124	6537.46	1.3462	0.0948727	0.0943727	0.734858	0.0722344	0.0526809	0.140227	94	450	3000	12.3949	0.0948727	0.0943727	0.734954	0.0722546	0.052552	0.140239
95	561.692	6556.39	1.37776	0.0958728	0.0953728	0.736837	0.0728303	0.0497029	0.14063	95	450	3000	12.3949	0.0958728	0.0953728	0.736809	0.0728464	0.0497147	0.14063
96	562.257	6575.22	1.40915	0.0968727	0.0963728	0.738762	0.0734321	0.0467845	0.141022	96	450	3000	12.3949	0.0968727	0.0963728	0.7386	0.0734421	0.0469389	0.141019
97	562.818	6593.92	1.44031	0.0978727	0.0973727	0.740626	0.0740391	0.0439325	0.141402	97	450	3000	12.3949	0.0978727	0.0973727	0.740328	0.0740427	0.0442309	0.141398
98	563.374	6612.47	1.47121	0.0988726	0.0983727	0.742425	0.0746508	0.0411538	0.141771	98	450	3000	12.3949	0.0988726	0.0983727	0.74199	0.0746478	0.041596	0.141766
99	563.925	6630.83	1.50181	0.0998726	0.0993726	0.744152	0.0752668	0.0384545	0.142127	99	450	3000	12.3949	0.0998726	0.0993726	0.743582	0.0752572	0.0390392	0.142122
100	564.47	6648.99	1.53208	0.100873	0.100373	0.745803	0.0758866	0.0358404	0.14247	100	450	3000	12.3949	0.100873	0.100373	0.7451	0.0758706	0.0365646	0.142465
101	565.008	6666.93	1.56197	0.101873	0.101373	0.747372	0.0765098	0.033317	0.142801	101	450	3000	12.3949	0.101873	0.101373	0.746541	0.0764874	0.0341764	0.142795
102	565.539	6684.63	1.59148	0.102873	0.102373	0.748856	0.0771361	0.0308888	0.143119	102	450	3000	12.3949	0.102873	0.102373	0.747902	0.0771075	0.0318776	0.143113
103	566.063	6702.09	1.62057	0.103873	0.103373	0.750251	0.0777652	0.0285597	0.143424	103	450	3000	12.3949	0.103873	0.103373	0.749181	0.0777309	0.0296707	0.143418
104	566.579	6719.29	1.64924	0.104873	0.104373	0.751554	0.0783971	0.0263331	0.143716	104	450	3000	12.3949	0.104873	0.104373	0.750375	0.0783573	0.0275577	0.14371
105	567.087	6736.23	1.67748	0.105873	0.105373	0.752761	0.0790316	0.0242114	0.143996	105	450	3000	12.3949	0.105873	0.105373	0.751484	0.0789868	0.02554	0.143989
106	567.587	6752.91	1.70528	0.106873	0.106373	0.753871	0.079669	0.0221964	0.144263	106	450	3000	12.3949	0.106873	0.106373	0.752506	0.0796197	0.023618	0.144257
107	568.08	6769.34	1.73266	0.107873	0.107373	0.754883	0.0803094	0.0202893	0.144518	107	450	3000	12.3949	0.107873	0.107373	0.75344	0.0802561	0.021792	0.144512
108	568.565	6785.52	1.75962	0.108873	0.108373	0.755795	0.080953	0.0184904	0.144761	108	450	3000	12.3949	0.108873	0.108373	0.754287	0.0808964	0.0200617	0.144755
109	569.044	6801.45	1.78618	0.109873	0.109373	0.756607	0.0816003	0.0167995	0.144993	109	450	3000	12.3949	0.109873	0.109373	0.755046	0.0815409	0.0184262	0.144987
110	569.515	6817.16	1.81236	0.110873	0.110373	0.757318	0.0822517	0.0152158	0.145214	110	450	3000	12.3949	0.110873	0.110373	0.755718	0.0821902	0.0168842	0.145207
111	569.98	6832.66	1.83818	0.111873	0.111373	0.75793	0.082908	0.0137379	0.145424	111	450	3000	12.3949	0.111873	0.111373	0.756306	0.0828447	0.0154343	0.145415
112	570.439	6847.96	1.86369	0.112873	0.112373	0.758442	0.0835697	0.0123633	0.145625	112	450	3000	12.3949	0.112873	0.112373	0.756822	0.0835054	0.0140744	0.145598
113	570.893	6863.1	1.88892	0.113873	0.113373	0.758857	0.0842378	0.01109	0.145816	113	450	3000	12.3949	0.113873	0.113373	0.7573	0.0841798	0.0128025	0.145718
114	571.343	6878.09	1.9139	0.114873	0.114373	0.759175	0.0849131	0.00991454	0.145997	114	450	3000	12.3949	0.114873	0.114373	0.757806	0.0848975	0.0116166	0.14568
115	571.454	6881.79	1.92007	0.114873	0.114873	0.759253	0.0850805	0.00962426	0.146042	115	450	3000	12.3949	0.114873	0.114873	0.758092	0.0852919	0.0110546	0.145562
116	572.152	6905.08	1.95889	0.115873	0.115373	0.75989	0.0857656	0.00881599	0.145529	116	450	3000	12.3949	0.115873	0.115373	0.758398	0.0857102	0.0105131	0.145378
117	573.048	6934.95	2.00866	0.116873	0.116373	0.760626	0.086671	0.00780945	0.144893	117	450	3000	12.3949	0.116873	0.116373	0.759055	0.0866073	0.00949083	0.144846
118	573.944	6964.81	2.05842	0.117873	0.117373	0.761268	0.0875909	0.00689569	0.144246	118	450	3000	12.3949	0.117873	0.117373	0.759699	0.0875343	0.00854504	0.144221
119	574.842	6994.73	2.10829	0.118873	0.118373	0.761818	0.0885274	0.00606931	0.143585	119	450	3000	12.3949	0.118873	0.118373	0.760287	0.0884768	0.00767219	0.143564
120	575.743	7024.78	2.15838	0.119873	0.119373	0.762282	0.0894825	0.00532402	0.142911	120	450	3000	12.3949	0.119873	0.119373	0.760805	0.0894366	0.00686873	0.14289
121	576.651	7055.02	2.20877	0.120873	0.120373	0.762664	0.0904584	0.00465415	0.142224	121	450	3000	12.3949	0.120873	0.120373	0.761251	0.0904171	0.0061312	0.142201
122	577.565	7085.51	2.25958	0.121873	0.121373	0.762967	0.0914573	0.00405422	0.141521	122	450	3000	12.3949	0.121873	0.121373	0.761625	0.091421	0.00545599	0.141498
123	578.489	7116.31	2.31092	0.122873	0.122373	0.763196	0.0924818	0.00351878	0.140803	123	450	3000	12.3949	0.122873	0.122373	0.76193	0.0924508	0.00483944	0.14078
124	579.425	7147.49	2.36288	0.123873	0.123373	0.763354	0.093534	0.00304261	0.14007	124	450	3000	12.3949	0.123873	0.123373	0.762168	0.0935087	0.0042779	0.140046
125	580.373	7179.1	2.41557	0.124873	0.124373	0.763443	0.0946164	0.00262077	0.139319	125	450	3000	12.3949	0.124873	0.124373	0.76234	0.0945972	0.00376769	0.139295
126	581.336	7211.21	2.46908	0.125873	0.125373	0.763468	0.0957318	0.00224835	0.138552	126	450	3000	12.3949	0.125873	0.125373	0.762448	0.0957187	0.00330507	0.138528
127	582.316	7243.87	2.52352	0.126873	0.126373	0.763429	0.0968825	0.00192073	0.137768	127	450	3000	12.3949	0.126873	0.126373	0.762495	0.0968759	0.0028863	0.137743
128	583.315	7277.15	2.57898	0.127873	0.127373	0.76333	0.0980716	0.00163358	0.136965	128	450	3000	12.3949	0.127873	0.127373	0.762481	0.0980715	0.00250763	0.136939
129	584.333	7311.1	2.63556	0.128873	0.128373	0.763172	0.0993017	0.00138282	0.136143	129	450	3000	12.3949	0.128873	0.128373	0.762409	0.0993083	0.00216534	0.136118
130	585.373	7345.78	2.69335	0.129874	0.129373	0.762957	0.100576	0.00116453	0.135302	130	450	3000	12.3949	0.129874	0.129373	0.762279	0.100589	0.00185569	0.135276
131	586.437	7381.25	2.75246	0.130874	0.130374	0.762686	0.101897	0.00097522	0.134441	131	450	3000	12.3949	0.130874	0.130374	0.762095	0.101918	0.00157499	0.134412
132	587.527	7417.56	2.81298	0.131874	0.131374	0.762359	0.103269	0.000811599	0.13356	132	450	3000	12.3949	0.131874	0.131374	0.761867	0.103302	0.00131955	0.133511
133	588.643	7454.77	2.87499	0.132873	0.132374	0.761977	0.104694	0.000670599	0.132659	133	450	3000	12.3949	0.132873	0.132374	0.761639	0.104766	0.00108576	0.132509
134	589.788	7492.94	2.9386	0.133873	0.133373	0.761539	0.106176	0.000549443	0.131735	134	450	3000	12.3949	0.133873	0.133373	0.76156	0.106395	0.000870071	0.131175
135	591.12	7522.39	3.07478	0.134873	0.134373	0.761559	0.108044	0.000443032	0.129954	135	450	3000	12.3949	0.134873	0.134373	0.762101	0.10847	0.000669134	0.12876
136	592.517	7550.34	3.23009	0.135873	0.135373	0.761626	0.11006	0.000345887	0.127968	136	450	3000	12.3949	0.135873	0.135373	0.764688	0.111956	0.000479936	0.122876
137	593.948	7578.95	3.38902	0.136873	0.136373	0.761623	0.112155	0.00025669	0.125966	137	450	3000	12.3949	0.136873	0.136373	0.772267	0.119537	0.000299613	0.107896
138	599.575	7157.55	3.81326	0.136874	0.136874	0.777654	0.125032	0.000211271	0.0971023	138	450	3000	12.3949	0.136874	0.136874	0.777654	0.125032	0.000211271	0.0971023
Baynidir Path 1_3: Primary										Baynidir Path 1_3: Diffused
Shell	temperature (｡C)	pressure (bar)	tot.time (my)	radius (cm)	X(node) (cm)	Xfe	Xmg	Xmn	Xca	Shell	temperature (｡C)	pressure (bar)	tot.time (my)	radius (cm)	X(node) (cm)	Xfe	Xmg	Xmn	Xca
1	539.934	5998.36	0.168973	0.000999657	0.000499828	0.643366	0.0528595	0.156059	0.147716	1	450	3000	12.3949	0.000999657	0.000499828	0.651161	0.0534211	0.148152	0.147265
2	540.182	6004.55	0.182729	0.00199945	0.00149955	0.644521	0.053056	0.15494	0.147483	2	450	3000	12.3949	0.00199945	0.00149955	0.65127	0.0534535	0.148052	0.147225
3	540.444	6011.09	0.197267	0.00299982	0.00249963	0.645741	0.0532643	0.153757	0.147238	3	450	3000	12.3949	0.00299982	0.00249963	0.651735	0.0535866	0.147621	0.147057
4	540.72	6017.99	0.212608	0.00399958	0.0034997	0.647029	0.053485	0.152507	0.14698	4	450	3000	12.3949	0.00399958	0.0034997	0.652431	0.0537642	0.146968	0.146836
5	541.011	6025.26	0.228773	0.00499956	0.00449957	0.648386	0.0537185	0.151188	0.146708	5	450	3000	12.3949	0.00499956	0.00449957	0.653318	0.0539691	0.146127	0.146586
6	541.317	6032.92	0.24579	0.00599962	0.00549959	0.649814	0.0539653	0.149797	0.146423	6	450	3000	12.3949	0.00599962	0.00549959	0.654374	0.0541954	0.145116	0.146315
7	541.639	6040.97	0.26367	0.00699929	0.00649946	0.651315	0.0542257	0.148335	0.146125	7	450	3000	12.3949	0.00699929	0.00649946	0.65558	0.0544406	0.143954	0.146026
8	541.977	6049.41	0.28244	0.00799916	0.00749922	0.65289	0.0545003	0.146797	0.145812	8	450	3000	12.3949	0.00799916	0.00749922	0.656922	0.0547036	0.142654	0.14572
9	542.331	6058.27	0.302116	0.00899935	0.00849925	0.654541	0.0547895	0.145184	0.145485	9	450	3000	12.3949	0.00899935	0.00849925	0.65839	0.054984	0.141227	0.145399
10	542.701	6067.53	0.322708	0.00999948	0.00949942	0.656269	0.0550938	0.143493	0.145145	10	450	3000	12.3949	0.00999948	0.00949942	0.659972	0.0552815	0.139684	0.145063
11	543.089	6077.22	0.344223	0.0109995	0.0104995	0.658074	0.0554134	0.141723	0.14479	11	450	3000	12.3949	0.0109995	0.0104995	0.66166	0.0555958	0.138032	0.144712
12	543.493	6087.32	0.366671	0.0119995	0.0114995	0.659956	0.0557487	0.139875	0.144421	12	450	3000	12.3949	0.0119995	0.0114995	0.663449	0.0559269	0.136278	0.144346
13	543.914	6097.84	0.390053	0.0129994	0.0124995	0.661916	0.0560999	0.137946	0.144038	13	450	3000	12.3949	0.0129994	0.0124995	0.665332	0.0562749	0.134427	0.143966
14	544.351	6108.78	0.414373	0.0139994	0.0134994	0.663953	0.0564675	0.135938	0.143641	14	450	3000	12.3949	0.0139994	0.0134994	0.667306	0.0566399	0.132482	0.143572
15	544.806	6120.15	0.439631	0.0149997	0.0144995	0.666069	0.0568516	0.133849	0.14323	15	450	3000	12.3949	0.0149997	0.0144995	0.669367	0.057022	0.130448	0.143163
16	545.277	6131.94	0.465828	0.0159998	0.0154997	0.668261	0.0572527	0.13168	0.142806	16	450	3000	12.3949	0.0159998	0.0154997	0.671511	0.0574213	0.128326	0.142741
17	545.765	6144.14	0.492943	0.0169998	0.0164998	0.670528	0.0576707	0.129432	0.142369	17	450	3000	12.3949	0.0169998	0.0164998	0.673734	0.0578378	0.126121	0.142306
18	546.27	6156.75	0.520963	0.0179996	0.0174997	0.672869	0.0581057	0.127106	0.14192	18	450	3000	12.3949	0.0179996	0.0174997	0.676033	0.0582715	0.123837	0.141859
19	546.79	6169.76	0.549878	0.0189996	0.0184996	0.675282	0.0585579	0.124703	0.141458	19	450	3000	12.3949	0.0189996	0.0184996	0.678404	0.0587225	0.121475	0.141399
20	547.327	6183.16	0.579673	0.0199995	0.0194996	0.677765	0.0590274	0.122224	0.140984	20	450	3000	12.3949	0.0199995	0.0194996	0.680842	0.0591906	0.119041	0.140927
21	547.878	6196.96	0.610324	0.0209996	0.0204996	0.680316	0.0595143	0.119671	0.140499	21	450	3000	12.3949	0.0209996	0.0204996	0.683343	0.059676	0.116538	0.140443
22	548.445	6211.12	0.641806	0.0219997	0.0214996	0.682932	0.0600185	0.117046	0.140003	22	450	3000	12.3949	0.0219997	0.0214996	0.685902	0.0601785	0.11397	0.13995
23	549.026	6225.65	0.674085	0.0229997	0.0224997	0.685609	0.0605399	0.114353	0.139497	23	450	3000	12.3949	0.0229997	0.0224997	0.688515	0.0606977	0.111342	0.139446
24	549.621	6240.52	0.707129	0.0239996	0.0234997	0.688344	0.0610783	0.111595	0.138982	24	450	3000	12.3949	0.0239996	0.0234997	0.691173	0.0612331	0.108658	0.138936
25	550.229	6255.72	0.740906	0.0249997	0.0244997	0.691134	0.0616336	0.108774	0.138459	25	450	3000	12.3949	0.0249997	0.0244997	0.693865	0.0617827	0.105923	0.138429
26	550.849	6271.23	0.775372	0.0259997	0.0254997	0.693972	0.0622056	0.105895	0.137928	26	450	3000	12.3949	0.0259997	0.0254997	0.696562	0.0623407	0.103139	0.137958
27	551.481	6287.03	0.810488	0.0269997	0.0264997	0.696855	0.0627939	0.102962	0.137389	27	450	3000	12.3949	0.0269997	0.0264997	0.699205	0.0628945	0.100306	0.137594
28	551.819	6295.47	0.82925	0.0273701	0.0271849	0.698395	0.0631102	0.10139	0.137105	28	450	3000	12.3949	0.0273701	0.0271849	0.700939	0.0632636	0.0983366	0.137461
29	552.267	6306.68	0.854156	0.02837	0.02787	0.700251	0.0635153	0.0989582	0.137275	29	450	3000	12.3949	0.02837	0.02787	0.702603	0.0636239	0.0963459	0.137427
30	552.809	6320.23	0.884276	0.0293699	0.0288699	0.702491	0.0640094	0.0960257	0.137474	30	450	3000	12.3949	0.0293699	0.0288699	0.704936	0.0641393	0.0934047	0.13752
31	553.363	6334.07	0.915036	0.03037	0.0298699	0.704767	0.064519	0.0930444	0.137669	31	450	3000	12.3949	0.03037	0.0298699	0.70723	0.0646559	0.0904299	0.137685
32	553.927	6348.18	0.946398	0.0313701	0.03087	0.707076	0.0650441	0.0900198	0.13786	32	450	3000	12.3949	0.0313701	0.03087	0.709521	0.0651823	0.0874284	0.137868
33	554.502	6362.55	0.978319	0.0323702	0.0318701	0.709412	0.0655843	0.0869575	0.138046	33	450	3000	12.3949	0.0323702	0.0318701	0.711821	0.0657219	0.084406	0.138051
34	555.086	6377.14	1.01076	0.0333702	0.0328702	0.711771	0.0661394	0.0838633	0.138226	34	450	3000	12.3949	0.0333702	0.0328702	0.714127	0.0662753	0.0813675	0.13823
35	555.678	6391.95	1.04366	0.0343701	0.0338702	0.714147	0.0667089	0.0807438	0.1384	35	450	3000	12.3949	0.0343701	0.0338702	0.716436	0.0668425	0.0783183	0.138403
36	556.278	6406.95	1.07699	0.0353702	0.0348702	0.716535	0.0672926	0.077605	0.138567	36	450	3000	12.3949	0.0353702	0.0348702	0.718744	0.0674231	0.0752638	0.138569
37	556.884	6422.11	1.11068	0.0363703	0.0358702	0.718929	0.0678899	0.074454	0.138727	37	450	3000	12.3949	0.0363703	0.0358702	0.721046	0.0680169	0.0722099	0.138728
38	557.496	6437.41	1.14469	0.0373702	0.0368703	0.721322	0.0685002	0.0712988	0.138879	38	450	3000	12.3949	0.0373702	0.0368703	0.723335	0.068623	0.0691635	0.138879
39	558.113	6452.83	1.17894	0.0383702	0.0378702	0.723708	0.069123	0.0681462	0.139022	39	450	3000	12.3949	0.0383702	0.0378702	0.725604	0.0692408	0.0661313	0.139024
40	558.733	6468.33	1.21341	0.0393703	0.0388703	0.726081	0.0697578	0.0650041	0.139157	40	450	3000	12.3949	0.0393703	0.0388703	0.727843	0.0698681	0.0631199	0.139169
41	559.356	6483.9	1.248	0.0403703	0.0398703	0.728432	0.0704037	0.0618807	0.139283	41	450	3000	12.3949	0.0403703	0.0398703	0.73003	0.0704993	0.060136	0.139334
42	559.98	6499.51	1.28267	0.0413703	0.0408703	0.730756	0.0710601	0.0587837	0.1394	42	450	3000	12.3949	0.0413703	0.0408703	0.732133	0.0711215	0.0571861	0.139559
43	560.553	6518.45	1.31452	0.0423703	0.0418703	0.732831	0.071645	0.0557106	0.139813	43	450	3000	12.3949	0.0423703	0.0418703	0.734126	0.0717234	0.0542763	0.139874
44	561.124	6537.46	1.3462	0.0433702	0.0428703	0.734858	0.0722344	0.0526809	0.140227	44	450	3000	12.3949	0.0433702	0.0428703	0.736023	0.0723141	0.0514148	0.140248
45	561.692	6556.39	1.37776	0.0443703	0.0438703	0.736837	0.0728303	0.0497029	0.14063	45	450	3000	12.3949	0.0443703	0.0438703	0.737847	0.0729046	0.048609	0.140639
46	562.257	6575.22	1.40915	0.0453703	0.0448703	0.738762	0.0734321	0.0467845	0.141022	46	450	3000	12.3949	0.0453703	0.0448703	0.739608	0.073499	0.0458659	0.141027
47	562.818	6593.92	1.44031	0.0463703	0.0458703	0.740626	0.0740391	0.0439325	0.141402	47	450	3000	12.3949	0.0463703	0.0458703	0.741304	0.0740982	0.0431916	0.141406
48	563.374	6612.47	1.47121	0.0473702	0.0468702	0.742425	0.0746508	0.0411538	0.141771	48	450	3000	12.3949	0.0473702	0.0468702	0.742933	0.074702	0.0405917	0.141773
49	563.925	6630.83	1.50181	0.0483702	0.0478702	0.744152	0.0752668	0.0384545	0.142127	49	450	3000	12.3949	0.0483702	0.0478702	0.744491	0.07531	0.0380709	0.142128
50	564.47	6648.99	1.53208	0.0493703	0.0488702	0.745803	0.0758866	0.0358404	0.14247	50	450	3000	12.3949	0.0493703	0.0488702	0.745974	0.0759218	0.0356331	0.142471
51	565.008	6666.93	1.56197	0.0503702	0.0498702	0.747372	0.0765098	0.033317	0.142801	51	450	3000	12.3949	0.0503702	0.0498702	0.747379	0.076537	0.0332825	0.142801
52	565.539	6684.63	1.59148	0.0513703	0.0508702	0.748856	0.0771361	0.0308888	0.143119	52	450	3000	12.3949	0.0513703	0.0508702	0.748704	0.0771556	0.0310219	0.143118
53	566.063	6702.09	1.62057	0.0523703	0.0518703	0.750251	0.0777652	0.0285597	0.143424	53	450	3000	12.3949	0.0523703	0.0518703	0.749946	0.0777773	0.0288536	0.143423
54	566.579	6719.29	1.64924	0.0533702	0.0528703	0.751554	0.0783971	0.0263331	0.143716	54	450	3000	12.3949	0.0533702	0.0528703	0.751104	0.078402	0.0267796	0.143715
55	567.087	6736.23	1.67748	0.0543702	0.0538702	0.752761	0.0790316	0.0242114	0.143996	55	450	3000	12.3949	0.0543702	0.0538702	0.752175	0.0790299	0.0248009	0.143994
56	567.587	6752.91	1.70528	0.0553702	0.0548702	0.753871	0.079669	0.0221964	0.144263	56	450	3000	12.3949	0.0553702	0.0548702	0.75316	0.079661	0.0229179	0.144261
57	568.08	6769.34	1.73266	0.0563703	0.0558703	0.754883	0.0803094	0.0202893	0.144518	57	450	3000	12.3949	0.0563703	0.0558703	0.754058	0.0802957	0.0211307	0.144515
58	568.565	6785.52	1.75962	0.0573702	0.0568703	0.755795	0.080953	0.0184904	0.144761	58	450	3000	12.3949	0.0573702	0.0568703	0.754868	0.0809343	0.0194389	0.144759
59	569.044	6801.45	1.78618	0.0583703	0.0578703	0.756607	0.0816003	0.0167995	0.144993	59	450	3000	12.3949	0.0583703	0.0578703	0.755591	0.0815771	0.0178413	0.14499
60	569.515	6817.16	1.81236	0.0593704	0.0588703	0.757318	0.0822517	0.0152158	0.145214	60	450	3000	12.3949	0.0593704	0.0588703	0.756228	0.0822248	0.0163365	0.145211
61	569.98	6832.66	1.83818	0.0603703	0.0598704	0.75793	0.082908	0.0137379	0.145424	61	450	3000	12.3949	0.0603703	0.0598704	0.756782	0.0828775	0.014923	0.145417
62	570.439	6847.96	1.86369	0.0613704	0.0608704	0.758442	0.0835697	0.0123633	0.145625	62	450	3000	12.3949	0.0613704	0.0608704	0.757265	0.0835367	0.0135985	0.1456
63	570.893	6863.1	1.88892	0.0623703	0.0618703	0.758857	0.0842378	0.01109	0.145816	63	450	3000	12.3949	0.0623703	0.0618703	0.757711	0.0842097	0.0123611	0.145719
64	571.343	6878.09	1.9139	0.0633702	0.0628703	0.759175	0.0849131	0.00991454	0.145997	64	450	3000	12.3949	0.0633702	0.0628703	0.758187	0.0849265	0.0112085	0.145678
65	571.454	6881.79	1.92007	0.0633708	0.0633705	0.759253	0.0850805	0.00962426	0.146042	65	450	3000	12.3949	0.0633708	0.0633705	0.758459	0.0853206	0.0106627	0.145558
66	572.152	6905.08	1.95889	0.0643708	0.0638708	0.75989	0.0857656	0.00881599	0.145529	66	450	3000	12.3949	0.0643708	0.0638708	0.758751	0.0857386	0.010137	0.145373
67	573.048	6934.95	2.00866	0.0653709	0.0648708	0.760626	0.086671	0.00780945	0.144893	67	450	3000	12.3949	0.0653709	0.0648708	0.75938	0.0866346	0.00914544	0.14484
68	573.944	6964.81	2.05842	0.0663708	0.0658709	0.761268	0.0875909	0.00689569	0.144246	68	450	3000	12.3949	0.0663708	0.0658709	0.759997	0.0875604	0.00822895	0.144214
69	574.842	6994.73	2.10829	0.0673709	0.0668709	0.761818	0.0885274	0.00606931	0.143585	69	450	3000	12.3949	0.0673709	0.0668709	0.760558	0.0885015	0.00738392	0.143556
70	575.743	7024.78	2.15838	0.0683709	0.0678709	0.762282	0.0894825	0.00532402	0.142911	70	450	3000	12.3949	0.0683709	0.0678709	0.761051	0.08946	0.0066068	0.142882
71	576.651	7055.02	2.20877	0.0693709	0.0688709	0.762664	0.0904584	0.00465415	0.142224	71	450	3000	12.3949	0.0693709	0.0688709	0.761473	0.0904393	0.00589407	0.142194
72	577.565	7085.51	2.25958	0.0703709	0.0698709	0.762967	0.0914573	0.00405422	0.141521	72	450	3000	12.3949	0.0703709	0.0698709	0.761825	0.0914421	0.00524212	0.141491
73	578.489	7116.31	2.31092	0.071371	0.0708709	0.763196	0.0924818	0.00351878	0.140803	73	450	3000	12.3949	0.071371	0.0708709	0.762109	0.0924709	0.00464727	0.140773
74	579.425	7147.49	2.36288	0.072371	0.071871	0.763354	0.093534	0.00304261	0.14007	74	450	3000	12.3949	0.072371	0.071871	0.762328	0.0935278	0.00410592	0.140039
75	580.373	7179.1	2.41557	0.073371	0.072871	0.763443	0.0946164	0.00262077	0.139319	75	450	3000	12.3949	0.073371	0.072871	0.762482	0.0946154	0.00361439	0.139288
76	581.336	7211.21	2.46908	0.074371	0.073871	0.763468	0.0957318	0.00224835	0.138552	76	450	3000	12.3949	0.074371	0.073871	0.762574	0.0957361	0.003169	0.138521
77	582.316	7243.87	2.52352	0.075371	0.074871	0.763429	0.0968825	0.00192073	0.137768	77	450	3000	12.3949	0.075371	0.074871	0.762606	0.0968925	0.00276608	0.137736
78	583.315	7277.15	2.57898	0.076371	0.075871	0.76333	0.0980716	0.00163358	0.136965	78	450	3000	12.3949	0.076371	0.075871	0.762578	0.0980874	0.00240198	0.136933
79	584.333	7311.1	2.63556	0.077371	0.076871	0.763172	0.0993017	0.00138282	0.136143	79	450	3000	12.3949	0.077371	0.076871	0.762493	0.0993235	0.00207307	0.136111
80	585.373	7345.78	2.69335	0.0783711	0.077871	0.762957	0.100576	0.00116453	0.135302	80	450	3000	12.3949	0.0783711	0.077871	0.762351	0.100604	0.00177577	0.135269
81	586.437	7381.25	2.75246	0.0793711	0.0788711	0.762686	0.101897	0.00097522	0.134441	81	450	3000	12.3949	0.0793711	0.0788711	0.762156	0.101932	0.00150652	0.134405
82	587.527	7417.56	2.81298	0.0803711	0.0798711	0.762359	0.103269	0.000811599	0.13356	82	450	3000	12.3949	0.0803711	0.0798711	0.761918	0.103316	0.00126184	0.133504
83	588.643	7454.77	2.87499	0.081371	0.080871	0.761977	0.104694	0.000670599	0.132659	83	450	3000	12.3949	0.081371	0.080871	0.761681	0.104779	0.00103832	0.132501
84	589.788	7492.94	2.9386	0.082371	0.081871	0.761539	0.106176	0.000549443	0.131735	84	450	3000	12.3949	0.082371	0.081871	0.761595	0.106409	0.000832665	0.131163
85	591.12	7522.39	3.07478	0.083371	0.082871	0.761559	0.108044	0.000443032	0.129954	85	450	3000	12.3949	0.083371	0.082871	0.762134	0.108487	0.000641793	0.128737
86	592.517	7550.34	3.23009	0.084371	0.083871	0.761626	0.11006	0.000345887	0.127968	86	450	3000	12.3949	0.084371	0.083871	0.764728	0.111982	0.000462986	0.122827
87	593.948	7578.95	3.38902	0.085371	0.084871	0.761623	0.112155	0.00025669	0.125966	87	450	3000	12.3949	0.085371	0.084871	0.772301	0.119565	0.000293702	0.10784
88	599.575	7157.55	3.81326	0.0853711	0.0853711	0.777654	0.125032	0.000211271	0.0971023	88	450	3000	12.3949	0.0853711	0.0853711	0.777654	0.125032	0.000211271	0.0971023
Baynidir Path 1_5: Primary										Baynidir Path 1_5: Diffused
Shell	temperature (｡C)	pressure (bar)	tot.time (my)	radius (cm)	X(node) (cm)	Xfe	Xmg	Xmn	Xca	hell	temperature (｡C)	pressure (bar)	tot.time (my)	radius (cm)	X(node) (cm)	Xfe	Xmg	Xmn	Xca
1	566.063	6702.09	1.62057	0.00100003	0.000500016	0.750251	0.0777652	0.0285597	0.143424	1	450	3000	12.3949	0.00100003	0.000500016	0.764834	0.0795145	0.0117171	0.143934
2	566.579	6719.29	1.64924	0.00199996	0.0015	0.751554	0.0783971	0.0263331	0.143716	2	450	3000	12.3949	0.00199996	0.0015	0.764742	0.0796051	0.011675	0.143978
3	567.087	6736.23	1.67748	0.00299994	0.00249995	0.752761	0.0790316	0.0242114	0.143996	3	450	3000	12.3949	0.00299994	0.00249995	0.764379	0.079972	0.011494	0.144155
4	567.587	6752.91	1.70528	0.00399997	0.00349995	0.753871	0.079669	0.0221964	0.144263	4	450	3000	12.3949	0.00399997	0.00349995	0.763961	0.080444	0.011223	0.144372
5	568.08	6769.34	1.73266	0.00499999	0.00449998	0.754883	0.0803094	0.0202893	0.144518	5	450	3000	12.3949	0.00499999	0.00449998	0.763559	0.0809646	0.0108782	0.144598
6	568.565	6785.52	1.75962	0.00599997	0.00549998	0.755795	0.080953	0.0184904	0.144761	6	450	3000	12.3949	0.00599997	0.00549998	0.763192	0.0815132	0.0104715	0.144823
7	569.044	6801.45	1.78618	0.00700003	0.0065	0.756607	0.0816003	0.0167995	0.144993	7	450	3000	12.3949	0.00700003	0.0065	0.762863	0.0820819	0.0100137	0.145042
8	569.515	6817.16	1.81236	0.00800011	0.00750007	0.757318	0.0822517	0.0152158	0.145214	8	450	3000	12.3949	0.00800011	0.00750007	0.762565	0.0826669	0.00951574	0.145252
9	569.98	6832.66	1.83818	0.00900004	0.00850007	0.75793	0.082908	0.0137379	0.145424	9	450	3000	12.3949	0.00900004	0.00850007	0.762295	0.0832661	0.00898806	0.145451
10	570.439	6847.96	1.86369	0.0100001	0.00950008	0.758442	0.0835697	0.0123633	0.145625	10	450	3000	12.3949	0.0100001	0.00950008	0.762057	0.0838794	0.00844076	0.145623
11	570.893	6863.1	1.88892	0.011	0.0105001	0.758857	0.0842378	0.01109	0.145816	11	450	3000	12.3949	0.011	0.0105001	0.761878	0.0845149	0.00788331	0.145724
12	571.343	6878.09	1.9139	0.012	0.0115	0.759175	0.0849131	0.00991454	0.145997	12	450	3000	12.3949	0.012	0.0115	0.761816	0.0852041	0.00732438	0.145656
13	571.454	6881.79	1.92007	0.0120005	0.0120002	0.759253	0.0850805	0.00962426	0.146042	13	450	3000	12.3949	0.0120005	0.0120002	0.761844	0.0855868	0.00704699	0.145522
14	572.152	6905.08	1.95889	0.0130005	0.0125005	0.75989	0.0857656	0.00881599	0.145529	14	450	3000	12.3949	0.0130005	0.0125005	0.761908	0.0859927	0.00677273	0.145327
15	573.048	6934.95	2.00866	0.0140006	0.0135006	0.760626	0.086671	0.00780945	0.144893	15	450	3000	12.3949	0.0140006	0.0135006	0.76212	0.0868645	0.00623322	0.144782
16	573.944	6964.81	2.05842	0.0150006	0.0145006	0.761268	0.0875909	0.00689569	0.144246	16	450	3000	12.3949	0.0150006	0.0145006	0.762368	0.0877664	0.00571014	0.144156
17	574.842	6994.73	2.10829	0.0160006	0.0155006	0.761818	0.0885274	0.00606931	0.143585	17	450	3000	12.3949	0.0160006	0.0155006	0.762605	0.0886863	0.0052074	0.143501
18	575.743	7024.78	2.15838	0.0170006	0.0165006	0.762282	0.0894825	0.00532402	0.142911	18	450	3000	12.3949	0.0170006	0.0165006	0.762815	0.0896263	0.00472799	0.14283
19	576.651	7055.02	2.20877	0.0180006	0.0175006	0.762664	0.0904584	0.00465415	0.142224	19	450	3000	12.3949	0.0180006	0.0175006	0.762991	0.0905896	0.00427414	0.142145
20	577.565	7085.51	2.25958	0.0190006	0.0185006	0.762967	0.0914573	0.00405422	0.141521	20	450	3000	12.3949	0.0190006	0.0185006	0.76313	0.0915784	0.00384723	0.141445
21	578.489	7116.31	2.31092	0.0200007	0.0195007	0.763196	0.0924818	0.00351878	0.140803	21	450	3000	12.3949	0.0200007	0.0195007	0.763229	0.0925949	0.00344798	0.140729
22	579.425	7147.49	2.36288	0.0210007	0.0205007	0.763354	0.093534	0.00304261	0.14007	22	450	3000	12.3949	0.0210007	0.0205007	0.763286	0.093641	0.00307655	0.139997
23	580.373	7179.1	2.41557	0.0220007	0.0215007	0.763443	0.0946164	0.00262077	0.139319	23	450	3000	12.3949	0.0220007	0.0215007	0.7633	0.0947191	0.0027326	0.139248
24	581.336	7211.21	2.46908	0.0230007	0.0225007	0.763468	0.0957318	0.00224835	0.138552	24	450	3000	12.3949	0.0230007	0.0225007	0.763271	0.0958314	0.00241537	0.138483
25	582.316	7243.87	2.52352	0.0240007	0.0235007	0.763429	0.0968825	0.00192073	0.137768	25	450	3000	12.3949	0.0240007	0.0235007	0.763197	0.0969804	0.00212379	0.137699
26	583.315	7277.15	2.57898	0.0250008	0.0245007	0.76333	0.0980716	0.00163358	0.136965	26	450	3000	12.3949	0.0250008	0.0245007	0.763077	0.0981688	0.00185652	0.136898
27	584.333	7311.1	2.63556	0.0260007	0.0255007	0.763172	0.0993017	0.00138282	0.136143	27	450	3000	12.3949	0.0260007	0.0255007	0.762912	0.0993991	0.00161203	0.136077
28	585.373	7345.78	2.69335	0.0270008	0.0265007	0.762957	0.100576	0.00116453	0.135302	28	450	3000	12.3949	0.0270008	0.0265007	0.7627	0.100674	0.00138866	0.135237
29	586.437	7381.25	2.75246	0.0280008	0.0275008	0.762686	0.101897	0.00097522	0.134441	29	450	3000	12.3949	0.0280008	0.0275008	0.762444	0.101998	0.00118462	0.134374
30	587.527	7417.56	2.81298	0.0290008	0.0285008	0.762359	0.103269	0.000811599	0.13356	30	450	3000	12.3949	0.0290008	0.0285008	0.762152	0.103378	0.000998125	0.133472
31	588.643	7454.77	2.87499	0.0300007	0.0295008	0.761977	0.104694	0.000670599	0.132659	31	450	3000	12.3949	0.0300007	0.0295008	0.761869	0.104838	0.000827371	0.132466
32	589.788	7492.94	2.9386	0.0310008	0.0305007	0.761539	0.106176	0.000549443	0.131735	32	450	3000	12.3949	0.0310008	0.0305007	0.761748	0.106469	0.000670612	0.131113
33	591.12	7522.39	3.07478	0.0320007	0.0315007	0.761559	0.108044	0.000443032	0.129954	33	450	3000	12.3949	0.0320007	0.0315007	0.762275	0.108559	0.000526273	0.12864
34	592.517	7550.34	3.23009	0.0330007	0.0325007	0.761626	0.11006	0.000345887	0.127968	34	450	3000	12.3949	0.0330007	0.0325007	0.764891	0.112088	0.000393069	0.122628
35	593.948	7578.95	3.38902	0.0340007	0.0335007	0.761623	0.112155	0.00025669	0.125966	35	450	3000	12.3949	0.0340007	0.0335007	0.772438	0.119676	0.000269876	0.107616
36	599.575	7157.55	3.81326	0.0340008	0.0340008	0.777654	0.125032	0.000211271	0.0971023	36	450	3000	12.3949	0.0340008	0.0340008	0.777654	0.125032	0.000211271	0.0971023
Baynidir Path 1_6: Primary										Baynidir Path 1_6: Diffused
Shell	temperature (｡C)	pressure (bar)	tot.time (my)	radius (cm)	X(node) (cm)	Xfe	Xmg	Xmn	Xca	Shell	temperature (｡C)	pressure (bar)	tot.time (my)	radius (cm)	X(node) (cm)	Xfe	Xmg	Xmn	Xca
1	584.333	7311.1	2.63556	0.00099996	0.00049998	0.763172	0.0993017	0.00138282	0.136143	1	450	3000	12.3949	0.00099996	0.00049998	0.763523	0.101494	0.000255299	0.134728
2	585.373	7345.78	2.69335	0.00200002	0.00149999	0.762957	0.100576	0.00116453	0.135302	2	450	3000	12.3949	0.00200002	0.00149999	0.763441	0.101731	0.000254442	0.134574
3	586.437	7381.25	2.75246	0.00300005	0.00250004	0.762686	0.101897	0.00097522	0.134441	3	450	3000	12.3949	0.00300005	0.00250004	0.763116	0.102674	0.000250798	0.13396
4	587.527	7417.56	2.81298	0.00400003	0.00350004	0.762359	0.103269	0.000811599	0.13356	4	450	3000	12.3949	0.00400003	0.00350004	0.762715	0.103877	0.000245517	0.133163
5	588.643	7454.77	2.87499	0.00499998	0.00450001	0.761977	0.104694	0.000670599	0.132659	5	450	3000	12.3949	0.00499998	0.00450001	0.762334	0.105243	0.000239143	0.132184
6	589.788	7492.94	2.9386	0.006	0.00549999	0.761539	0.106176	0.000549443	0.131735	6	450	3000	12.3949	0.006	0.00549999	0.762162	0.106832	0.000232172	0.130774
7	591.12	7522.39	3.07478	0.00699998	0.00649999	0.761559	0.108044	0.000443032	0.129954	7	450	3000	12.3949	0.00699998	0.00649999	0.762741	0.108949	0.00022514	0.128084
8	592.517	7550.34	3.23009	0.00799998	0.00749998	0.761626	0.11006	0.000345887	0.127968	8	450	3000	12.3949	0.00799998	0.00749998	0.76555	0.112617	0.000218674	0.121615
9	593.948	7578.95	3.38902	0.00899996	0.00849997	0.761623	0.112155	0.00025669	0.125966	9	450	3000	12.3949	0.00899996	0.00849997	0.773002	0.120172	0.000213433	0.106612
10	599.575	7157.55	3.81326	0.00900009	0.00900003	0.777654	0.125032	0.000211271	0.0971023	10	450	3000	12.3949	0.00900009	0.00900003	0.777654	0.125032	0.000211271	0.0971023

## Sheet: Baynidir Path2
Baynidir Path 2_1: Primary										Baynidir Path 2_1: Diffused
Shell	temperature (｡C)	pressure (bar)	tot.time (my)	radius (cm)	X(node) (cm)	Xfe	Xmg	Xmn	Xca	Shell	temperature (｡C)	pressure (bar)	tot.time (my)	radius (cm)	X(node) (cm)	Xfe	Xmg	Xmn	Xca
1	529.013	6348.16	0	0.002079	0.0010395	0.593624	0.04199	0.162511	0.201876	1	450	3000	21.7214	0.002079	0.0010395	0.598383	0.0421669	0.157678	0.201772
2	529.014	6348.16	1.1868e-05	0.00316885	0.00262392	0.593625	0.0419902	0.16251	0.201875	2	450	3000	21.7214	0.00316885	0.00262392	0.598418	0.042169	0.157645	0.201768
3	529.014	6348.17	4.74722e-05	0.00423065	0.00369975	0.593627	0.0419907	0.162508	0.201874	3	450	3000	21.7214	0.00423065	0.00369975	0.598476	0.0421724	0.15759	0.201762
4	529.015	6348.18	9.32489e-05	0.00507413	0.00465239	0.593631	0.0419913	0.162506	0.201872	4	450	3000	21.7214	0.00507413	0.00465239	0.598546	0.0421765	0.157524	0.201754
5	529.016	6348.2	0.000162762	0.0060514	0.00556276	0.593637	0.0419922	0.162502	0.201869	5	450	3000	21.7214	0.0060514	0.00556276	0.598628	0.0421813	0.157446	0.201745
6	529.018	6348.22	0.000262792	0.00702384	0.00653762	0.593645	0.0419935	0.162497	0.201864	6	450	3000	21.7214	0.00702384	0.00653762	0.598732	0.0421875	0.157347	0.201733
7	529.021	6348.25	0.000400123	0.0080274	0.00752562	0.593657	0.0419953	0.16249	0.201858	7	450	3000	21.7214	0.0080274	0.00752562	0.598856	0.0421949	0.157231	0.201719
8	529.024	6348.28	0.000574752	0.00901467	0.00852104	0.593671	0.0419976	0.16248	0.201851	8	450	3000	21.7214	0.00901467	0.00852104	0.598998	0.0422036	0.157096	0.201702
9	529.028	6348.33	0.000793463	0.0100043	0.00950947	0.593689	0.0420005	0.162469	0.201841	9	450	3000	21.7214	0.0100043	0.00950947	0.599158	0.0422133	0.156946	0.201683
10	529.032	6348.39	0.00106304	0.011	0.0105021	0.593712	0.042004	0.162455	0.20183	10	450	3000	21.7214	0.011	0.0105021	0.599338	0.0422244	0.156777	0.201661
11	529.038	6348.46	0.00139026	0.0120026	0.0115013	0.593739	0.0420083	0.162437	0.201815	11	450	3000	21.7214	0.0120026	0.0115013	0.599539	0.0422369	0.156589	0.201636
12	529.045	6348.54	0.00177512	0.0129997	0.0125011	0.593771	0.0420134	0.162417	0.201799	12	450	3000	21.7214	0.0129997	0.0125011	0.59976	0.0422509	0.156382	0.201607
13	529.053	6348.64	0.0022278	0.0140027	0.0135012	0.593808	0.0420193	0.162393	0.201779	13	450	3000	21.7214	0.0140027	0.0135012	0.600002	0.0422664	0.156156	0.201576
14	529.063	6348.75	0.00275169	0.0150023	0.0145025	0.593852	0.0420262	0.162366	0.201757	14	450	3000	21.7214	0.0150023	0.0145025	0.600267	0.0422835	0.155909	0.20154
15	529.074	6348.88	0.00335018	0.0160015	0.0155019	0.593901	0.0420341	0.162334	0.201731	15	450	3000	21.7214	0.0160015	0.0155019	0.600554	0.0423024	0.155643	0.201501
16	529.086	6349.03	0.00403005	0.0170042	0.0165028	0.593958	0.042043	0.162298	0.201701	16	450	3000	21.7214	0.0170042	0.0165028	0.600865	0.0423231	0.155356	0.201456
17	529.1	6349.2	0.00479808	0.018006	0.0175051	0.594021	0.0420531	0.162257	0.201668	17	450	3000	21.7214	0.018006	0.0175051	0.601201	0.0423458	0.155046	0.201407
18	529.115	6349.38	0.00565427	0.0190105	0.0185083	0.594093	0.0420643	0.162212	0.201631	18	450	3000	21.7214	0.0190105	0.0185083	0.601562	0.0423708	0.154714	0.201353
19	529.132	6349.59	0.0066088	0.0200075	0.019509	0.594172	0.0420769	0.162162	0.20159	19	450	3000	21.7214	0.0200075	0.019509	0.60195	0.0423979	0.154359	0.201293
20	529.151	6349.81	0.00766167	0.0210068	0.0205072	0.594259	0.0420908	0.162106	0.201544	20	450	3000	21.7214	0.0210068	0.0205072	0.602364	0.0424275	0.153982	0.201227
21	529.172	6350.07	0.00881965	0.0220046	0.0215057	0.594355	0.042106	0.162045	0.201494	21	450	3000	21.7214	0.0220046	0.0215057	0.602807	0.0424597	0.15358	0.201153
22	529.195	6350.34	0.0100895	0.0230056	0.0225051	0.59446	0.0421227	0.161978	0.201439	22	450	3000	21.7214	0.0230056	0.0225051	0.60328	0.0424948	0.153153	0.201072
23	529.22	6350.64	0.0114781	0.024006	0.0235058	0.594575	0.042141	0.161904	0.201379	23	450	3000	21.7214	0.024006	0.0235058	0.603785	0.042533	0.152699	0.200983
24	529.247	6350.96	0.0129853	0.025006	0.024506	0.5947	0.0421609	0.161824	0.201314	24	450	3000	21.7214	0.025006	0.024506	0.604322	0.0425746	0.152218	0.200885
25	529.276	6351.32	0.014618	0.0260023	0.0255041	0.594836	0.0421824	0.161738	0.201244	25	450	3000	21.7214	0.0260023	0.0255041	0.604892	0.0426197	0.151711	0.200777
26	529.309	6351.7	0.0164067	0.0270012	0.0265017	0.594984	0.042206	0.161643	0.201167	26	450	3000	21.7214	0.0270012	0.0265017	0.605497	0.0426686	0.151176	0.200659
27	529.344	6352.13	0.0183887	0.0280017	0.0275014	0.595149	0.0422321	0.161538	0.201081	27	450	3000	21.7214	0.0280017	0.0275014	0.606139	0.0427217	0.15061	0.200528
28	529.384	6352.61	0.0205944	0.029002	0.0285019	0.595332	0.0422612	0.161421	0.200986	28	450	3000	21.7214	0.029002	0.0285019	0.60682	0.0427794	0.150015	0.200386
29	529.428	6353.14	0.0230579	0.0300016	0.0295018	0.595536	0.0422937	0.16129	0.20088	29	450	3000	21.7214	0.0300016	0.0295018	0.607541	0.0428419	0.149388	0.200229
30	529.478	6353.74	0.0258164	0.0310013	0.0305015	0.595765	0.0423302	0.161143	0.200762	30	450	3000	21.7214	0.0310013	0.0305015	0.608301	0.0429095	0.148731	0.200058
31	529.534	6354.4	0.0289038	0.0320011	0.0315012	0.596021	0.042371	0.160979	0.200629	31	450	3000	21.7214	0.0320011	0.0315012	0.609105	0.0429825	0.148041	0.199872
32	529.596	6355.15	0.032354	0.0330016	0.0325014	0.596308	0.0424166	0.160795	0.200481	32	450	3000	21.7214	0.0330016	0.0325014	0.609952	0.0430614	0.147318	0.199669
33	529.665	6355.98	0.0362077	0.034002	0.0335018	0.596628	0.0424677	0.16059	0.200315	33	450	3000	21.7214	0.034002	0.0335018	0.610844	0.0431466	0.146561	0.199448
34	529.742	6356.91	0.0404921	0.0350024	0.0345022	0.596983	0.0425245	0.160361	0.200131	34	450	3000	21.7214	0.0350024	0.0345022	0.611784	0.0432383	0.14577	0.199208
35	529.828	6357.93	0.045241	0.0360029	0.0355026	0.597377	0.0425875	0.160107	0.199928	35	450	3000	21.7214	0.0360029	0.0355026	0.612771	0.0433371	0.144944	0.198949
36	529.922	6359.06	0.050485	0.0370033	0.0365031	0.597813	0.0426572	0.159826	0.199704	36	450	3000	21.7214	0.0370033	0.0365031	0.613807	0.0434431	0.144082	0.198668
37	530.026	6360.31	0.0562613	0.0380027	0.037503	0.598293	0.042734	0.159516	0.199457	37	450	3000	21.7214	0.0380027	0.037503	0.614892	0.0435569	0.143185	0.198366
38	530.14	6361.68	0.0625971	0.0390028	0.0385027	0.598819	0.0428185	0.159176	0.199187	38	450	3000	21.7214	0.0390028	0.0385027	0.616029	0.0436787	0.142251	0.198041
39	530.265	6363.18	0.0695264	0.0400029	0.0395028	0.599395	0.0429109	0.158803	0.198892	39	450	3000	21.7214	0.0400029	0.0395028	0.617218	0.0438091	0.14128	0.197692
40	530.401	6364.81	0.0770795	0.041003	0.0405029	0.600023	0.0430119	0.158395	0.198571	40	450	3000	21.7214	0.041003	0.0405029	0.618461	0.0439484	0.140272	0.197318
41	530.548	6366.58	0.0852837	0.0420028	0.0415029	0.600704	0.0431218	0.157951	0.198222	41	450	3000	21.7214	0.0420028	0.0415029	0.619758	0.044097	0.139227	0.196918
42	530.708	6368.5	0.0941661	0.0430023	0.0425026	0.601443	0.043241	0.15747	0.197846	42	450	3000	21.7214	0.0430023	0.0425026	0.621108	0.0442552	0.138145	0.196492
43	530.881	6370.57	0.103761	0.0440024	0.0435024	0.602241	0.0433701	0.156948	0.197441	43	450	3000	21.7214	0.0440024	0.0435024	0.622515	0.0444235	0.137024	0.196038
44	531.067	6372.8	0.114087	0.0450022	0.0445023	0.6031	0.0435094	0.156385	0.197006	44	450	3000	21.7214	0.0450022	0.0445023	0.623977	0.0446023	0.135866	0.195555
45	531.267	6375.2	0.125177	0.0460022	0.0455022	0.604023	0.0436593	0.155778	0.19654	45	450	3000	21.7214	0.0460022	0.0455022	0.625495	0.044792	0.13467	0.195044
46	531.48	6377.76	0.137054	0.0470023	0.0465023	0.605011	0.0438203	0.155126	0.196043	46	450	3000	21.7214	0.0470023	0.0465023	0.627069	0.0449929	0.133436	0.194502
47	531.709	6380.5	0.149737	0.0480024	0.0475024	0.606068	0.0439928	0.154427	0.195513	47	450	3000	21.7214	0.0480024	0.0475024	0.6287	0.0452055	0.132165	0.19393
48	531.952	6383.42	0.163252	0.0490025	0.0485024	0.607193	0.0441771	0.15368	0.19495	48	450	3000	21.7214	0.0490025	0.0485024	0.630386	0.0454302	0.130857	0.193327
49	532.21	6386.52	0.177614	0.0500024	0.0495024	0.60839	0.0443737	0.152882	0.194354	49	450	3000	21.7214	0.0500024	0.0495024	0.632128	0.0456672	0.129512	0.192693
50	532.484	6389.81	0.192844	0.0510024	0.0505024	0.609659	0.0445829	0.152033	0.193725	50	450	3000	21.7214	0.0510024	0.0505024	0.633925	0.0459169	0.128132	0.192026
51	532.775	6393.29	0.208959	0.0520027	0.0515026	0.611003	0.0448051	0.151131	0.193061	51	450	3000	21.7214	0.0520027	0.0515026	0.635777	0.0461799	0.126716	0.191328
52	533.081	6396.98	0.226003	0.0530032	0.052503	0.612425	0.0450411	0.150172	0.192362	52	450	3000	21.7214	0.0530032	0.052503	0.637682	0.0464564	0.125265	0.190597
53	533.405	6400.86	0.24399	0.0540033	0.0535032	0.613925	0.0452912	0.149156	0.191628	53	450	3000	21.7214	0.0540033	0.0535032	0.63964	0.0467467	0.12378	0.189833
54	533.746	6404.96	0.262947	0.0550036	0.0545035	0.615508	0.045556	0.148079	0.190857	54	450	3000	21.7214	0.0550036	0.0545035	0.641648	0.0470511	0.122263	0.189038
55	534.106	6409.27	0.282917	0.0560037	0.0555037	0.617175	0.0458363	0.146939	0.19005	55	450	3000	21.7214	0.0560037	0.0555037	0.643706	0.0473699	0.120714	0.18821
56	534.484	6413.8	0.303905	0.0570038	0.0565038	0.618928	0.0461323	0.145735	0.189205	56	450	3000	21.7214	0.0570038	0.0565038	0.645811	0.0477033	0.119134	0.187352
57	534.88	6418.56	0.325941	0.0580037	0.0575038	0.620769	0.0464447	0.144463	0.188323	57	450	3000	21.7214	0.0580037	0.0575038	0.64796	0.0480514	0.117525	0.186463
58	535.296	6423.55	0.349041	0.0590037	0.0585037	0.6227	0.046774	0.143123	0.187404	58	450	3000	21.7214	0.0590037	0.0585037	0.650151	0.0484145	0.115888	0.185546
59	535.731	6428.78	0.373226	0.0600036	0.0595037	0.624721	0.0471208	0.141711	0.186447	59	450	3000	21.7214	0.0600036	0.0595037	0.652382	0.0487926	0.114224	0.184602
60	536.186	6434.24	0.398503	0.0610038	0.0605037	0.626835	0.0474855	0.140227	0.185453	60	450	3000	21.7214	0.0610038	0.0605037	0.654648	0.0491855	0.112535	0.183632
61	536.661	6439.93	0.424886	0.0620038	0.0615038	0.629042	0.0478685	0.138668	0.184422	61	450	3000	21.7214	0.0620038	0.0615038	0.656945	0.0495933	0.110821	0.182641
62	537.156	6445.87	0.452374	0.0630038	0.0625038	0.631341	0.0482702	0.137034	0.183355	62	450	3000	21.7214	0.0630038	0.0625038	0.65927	0.0500155	0.109084	0.18163
63	537.671	6452.05	0.480971	0.0640038	0.0635038	0.633734	0.048691	0.135323	0.182252	63	450	3000	21.7214	0.0640038	0.0635038	0.661617	0.0504518	0.107327	0.180604
64	538.205	6458.46	0.510673	0.0650038	0.0645038	0.636219	0.0491312	0.133534	0.181116	64	450	3000	21.7214	0.0650038	0.0645038	0.663981	0.0509016	0.10555	0.179567
65	538.76	6465.12	0.541474	0.0660038	0.0655038	0.638796	0.0495911	0.131667	0.179946	65	450	3000	21.7214	0.0660038	0.0655038	0.666356	0.0513643	0.103755	0.178525
66	539.334	6472.01	0.573367	0.0670039	0.0665038	0.641464	0.050071	0.129721	0.178744	66	450	3000	21.7214	0.0670039	0.0665038	0.668736	0.0518392	0.101943	0.177482
67	539.927	6479.13	0.606335	0.0680038	0.0675038	0.644221	0.0505711	0.127696	0.177511	67	450	3000	21.7214	0.0680038	0.0675038	0.671114	0.0523252	0.100117	0.176444
68	540.54	6486.48	0.640361	0.0690038	0.0685038	0.647066	0.0510916	0.125593	0.17625	68	450	3000	21.7214	0.0690038	0.0685038	0.673483	0.0528214	0.0982774	0.175418
69	541.171	6494.05	0.675424	0.0700039	0.0695038	0.649997	0.0516326	0.12341	0.174961	69	450	3000	21.7214	0.0700039	0.0695038	0.675838	0.0533267	0.0964263	0.174409
70	541.82	6501.84	0.711494	0.0710038	0.0705038	0.653009	0.0521941	0.12115	0.173646	70	450	3000	21.7214	0.0710038	0.0705038	0.678171	0.0538399	0.0945654	0.173424
71	542.487	6509.84	0.748545	0.0720038	0.0715038	0.656102	0.0527761	0.118814	0.172308	71	450	3000	21.7214	0.0720038	0.0715038	0.680474	0.0543599	0.0926965	0.172469
72	543.171	6518.05	0.786544	0.0730038	0.0725038	0.65927	0.0533788	0.116402	0.170949	72	450	3000	21.7214	0.0730038	0.0725038	0.682743	0.0548857	0.0908211	0.17155
73	543.871	6526.46	0.825449	0.0740038	0.0735038	0.662511	0.0540018	0.113917	0.16957	73	450	3000	21.7214	0.0740038	0.0735038	0.684972	0.0554161	0.0889411	0.170671
74	544.587	6535.05	0.865223	0.0750038	0.0745038	0.665819	0.0546452	0.111361	0.168174	74	450	3000	21.7214	0.0750038	0.0745038	0.687154	0.0559503	0.0870584	0.169837
75	545.277	6543.32	0.903539	0.0759297	0.0754667	0.669002	0.0552712	0.108884	0.166842	75	450	3000	21.7214	0.0759297	0.0754667	0.689208	0.0564675	0.0852444	0.16908
76	545.84	6550.08	0.934825	0.0769296	0.0764297	0.671469	0.0557569	0.106322	0.166452	76	450	3000	21.7214	0.0769296	0.0764297	0.691212	0.0569868	0.0834312	0.16837
77	546.43	6557.15	0.967573	0.0779297	0.0774297	0.674042	0.0562706	0.103649	0.166038	77	450	3000	21.7214	0.0779297	0.0774297	0.693237	0.0575278	0.0815507	0.167684
78	547.035	6564.41	1.00118	0.0789297	0.0784297	0.676674	0.0568036	0.100915	0.165608	78	450	3000	21.7214	0.0789297	0.0784297	0.695204	0.0580704	0.0796745	0.167051
79	547.655	6571.86	1.03563	0.0799297	0.0794297	0.67936	0.0573559	0.0981228	0.165161	79	450	3000	21.7214	0.0799297	0.0794297	0.69711	0.0586144	0.0778046	0.166471
80	548.289	6579.47	1.07089	0.0809297	0.0804297	0.682097	0.0579278	0.0952767	0.164699	80	450	3000	21.7214	0.0809297	0.0804297	0.698954	0.0591597	0.0759427	0.165943
81	548.938	6587.25	1.10692	0.0819298	0.0814297	0.68488	0.058519	0.0923805	0.16422	81	450	3000	21.7214	0.0819298	0.0814297	0.700739	0.0597066	0.0740906	0.165464
82	549.599	6595.19	1.14368	0.0829298	0.0824298	0.687706	0.0591296	0.089439	0.163726	82	450	3000	21.7214	0.0829298	0.0824298	0.702463	0.0602553	0.07225	0.165032
83	550.243	6604.86	1.17943	0.0839299	0.0834298	0.690432	0.0597193	0.0864466	0.163403	83	450	3000	21.7214	0.0839299	0.0834298	0.704128	0.0608063	0.0704226	0.164643
84	550.852	6617.04	1.21327	0.0849299	0.0844299	0.692985	0.0602662	0.0834052	0.163344	84	450	3000	21.7214	0.0849299	0.0844299	0.705737	0.0613598	0.06861	0.164294
85	551.471	6629.41	1.24762	0.0859298	0.0854299	0.695559	0.060828	0.0803379	0.163275	85	450	3000	21.7214	0.0859298	0.0854299	0.70729	0.0619164	0.0668139	0.16398
86	552.097	6641.94	1.28244	0.0869299	0.0864299	0.698149	0.0614046	0.0772506	0.163196	86	450	3000	21.7214	0.0869299	0.0864299	0.70879	0.0624766	0.0650355	0.163698
87	552.731	6654.62	1.31765	0.0879298	0.0874299	0.700748	0.0619954	0.0741504	0.163106	87	450	3000	21.7214	0.0879298	0.0874299	0.710238	0.0630409	0.0632763	0.163444
88	553.371	6667.43	1.35322	0.0889298	0.0884298	0.70335	0.0626	0.0710444	0.163006	88	450	3000	21.7214	0.0889298	0.0884298	0.711638	0.0636095	0.0615377	0.163215
89	554.017	6680.34	1.38907	0.0899298	0.0894298	0.705948	0.0632178	0.0679395	0.162895	89	450	3000	21.7214	0.0899298	0.0894298	0.712991	0.064183	0.0598205	0.163005
90	554.667	6693.33	1.42516	0.0909298	0.0904298	0.708534	0.0638483	0.0648435	0.162774	90	450	3000	21.7214	0.0909298	0.0904298	0.714299	0.0647616	0.0581261	0.162813
91	555.319	6706.38	1.46141	0.0919298	0.0914298	0.711103	0.0644906	0.0617641	0.162642	91	450	3000	21.7214	0.0919298	0.0914298	0.715564	0.0653455	0.0564553	0.162635
92	555.974	6719.47	1.49777	0.0929298	0.0924298	0.713646	0.0651443	0.0587088	0.1625	92	450	3000	21.7214	0.0929298	0.0924298	0.716787	0.0659351	0.054809	0.162469
93	556.629	6732.58	1.53418	0.0939299	0.0934298	0.716157	0.0658086	0.0556854	0.162349	93	450	3000	21.7214	0.0939299	0.0934298	0.717971	0.0665304	0.053188	0.162311
94	557.284	6745.68	1.57057	0.0949299	0.0944299	0.718628	0.0664827	0.0527018	0.162187	94	450	3000	21.7214	0.0949299	0.0944299	0.719115	0.0671316	0.051593	0.162161
95	557.938	6758.76	1.60688	0.0959299	0.0954299	0.721052	0.0671658	0.0497655	0.162016	95	450	3000	21.7214	0.0959299	0.0954299	0.720222	0.0677388	0.0500246	0.162015
96	558.589	6771.78	1.64305	0.0969299	0.0964299	0.723422	0.0678572	0.0468841	0.161837	96	450	3000	21.7214	0.0969299	0.0964299	0.721293	0.0683524	0.0484834	0.161871
97	559.237	6784.73	1.67903	0.0979298	0.0974298	0.725731	0.0685562	0.0440648	0.161648	97	450	3000	21.7214	0.0979298	0.0974298	0.722329	0.0689725	0.04697	0.161728
98	559.88	6797.6	1.71477	0.0989298	0.0984298	0.727972	0.069262	0.0413139	0.161452	98	450	3000	21.7214	0.0989298	0.0984298	0.723333	0.0695997	0.0454844	0.161583
99	560.495	6811.54	1.74891	0.0999298	0.0994298	0.730042	0.0699386	0.038635	0.161385	99	450	3000	21.7214	0.0999298	0.0994298	0.724306	0.0702345	0.0440271	0.161433
100	561.098	6825.62	1.78243	0.10093	0.10043	0.732011	0.0706122	0.0360365	0.16134	100	450	3000	21.7214	0.10093	0.10043	0.725249	0.0708777	0.0425984	0.161274
101	561.695	6839.54	1.81558	0.10193	0.10143	0.733898	0.0712903	0.0335259	0.161286	101	450	3000	21.7214	0.10193	0.10143	0.726167	0.0715304	0.0411985	0.161104
102	562.284	6853.3	1.84833	0.10293	0.10243	0.735697	0.0719724	0.0311073	0.161224	102	450	3000	21.7214	0.10293	0.10243	0.72706	0.0721938	0.0398276	0.160918
103	562.866	6866.88	1.88067	0.10393	0.10343	0.737404	0.0726583	0.0287848	0.161153	103	450	3000	21.7214	0.10393	0.10343	0.727934	0.0728693	0.0384855	0.160711
104	563.44	6880.27	1.91257	0.10493	0.10443	0.739017	0.0733477	0.0265622	0.161073	104	450	3000	21.7214	0.10493	0.10443	0.72879	0.0735588	0.0371726	0.160479
105	564.006	6893.48	1.94402	0.10593	0.10543	0.740531	0.0740405	0.0244418	0.160986	105	450	3000	21.7214	0.10593	0.10543	0.729633	0.0742643	0.0358887	0.160214
106	564.564	6906.5	1.97502	0.10693	0.10643	0.741946	0.0747368	0.0224258	0.160892	106	450	3000	21.7214	0.10693	0.10643	0.730466	0.074988	0.0346337	0.159912
107	565.114	6919.33	2.00556	0.10793	0.10743	0.743258	0.0754365	0.0205156	0.16079	107	450	3000	21.7214	0.10793	0.10743	0.731294	0.0757323	0.0334075	0.159566
108	565.656	6931.98	2.03567	0.10893	0.10843	0.744467	0.0761399	0.018712	0.160681	108	450	3000	21.7214	0.10893	0.10843	0.73212	0.0764998	0.0322101	0.15917
109	566.19	6944.44	2.06535	0.10993	0.10943	0.745572	0.0768475	0.0170147	0.160566	109	450	3000	21.7214	0.10993	0.10943	0.732947	0.077293	0.0310411	0.158718
110	566.717	6956.74	2.09463	0.11093	0.11043	0.746574	0.0775596	0.0154233	0.160443	110	450	3000	21.7214	0.11093	0.11043	0.73378	0.0781147	0.0299002	0.158205
111	567.238	6968.88	2.12354	0.11193	0.11143	0.747472	0.0782769	0.0139363	0.160315	111	450	3000	21.7214	0.11193	0.11143	0.734621	0.0789673	0.0287873	0.157625
112	567.752	6980.87	2.1521	0.11293	0.11243	0.748268	0.0790002	0.0125522	0.16018	112	450	3000	21.7214	0.11293	0.11243	0.735471	0.0798534	0.0277018	0.156974
113	568.26	6992.74	2.18035	0.11393	0.11343	0.748963	0.0797303	0.0112683	0.160038	113	450	3000	21.7214	0.11393	0.11343	0.736332	0.0807751	0.0266435	0.15625
114	568.764	7004.5	2.20836	0.11493	0.11443	0.749559	0.0804683	0.0100819	0.159891	114	450	3000	21.7214	0.11493	0.11443	0.737204	0.0817346	0.0256117	0.15545
115	569.763	7027.81	2.26384	0.11593	0.11543	0.75091	0.0815365	0.00897317	0.15858	115	450	3000	21.7214	0.11593	0.11543	0.738087	0.0827336	0.0246061	0.154573
116	570.831	7052.73	2.32319	0.11693	0.11643	0.752276	0.0826654	0.00795815	0.1571	116	450	3000	21.7214	0.11693	0.11643	0.738979	0.0837737	0.0236262	0.153621
117	571.897	7077.6	2.38239	0.11793	0.11743	0.753534	0.0838098	0.00703478	0.155621	117	450	3000	21.7214	0.11793	0.11743	0.739879	0.0848562	0.0226713	0.152594
118	572.962	7102.45	2.44156	0.11893	0.11843	0.75469	0.0849718	0.00619751	0.154141	118	450	3000	21.7214	0.11893	0.11843	0.740782	0.0859824	0.0217409	0.151495
119	574.028	7127.33	2.50081	0.11993	0.11943	0.755747	0.0861541	0.00544114	0.152658	119	450	3000	21.7214	0.11993	0.11943	0.741686	0.0871532	0.0208344	0.150326
120	575.098	7152.29	2.56025	0.12093	0.12043	0.756711	0.0873589	0.00476031	0.15117	120	450	3000	21.7214	0.12093	0.12043	0.742586	0.0883695	0.0199513	0.149093
121	576.174	7177.39	2.61999	0.12193	0.12143	0.757586	0.0885889	0.00414972	0.149675	121	450	3000	21.7214	0.12193	0.12143	0.743479	0.089632	0.0190908	0.147798
122	577.257	7202.65	2.68015	0.12293	0.12243	0.758377	0.089847	0.00360406	0.148172	122	450	3000	21.7214	0.12293	0.12243	0.744359	0.0909417	0.0182523	0.146447
123	578.349	7228.14	2.74084	0.12393	0.12343	0.759086	0.0911358	0.00311825	0.14666	123	450	3000	21.7214	0.12393	0.12343	0.745222	0.0922994	0.0174353	0.145043
124	579.453	7253.9	2.80217	0.12493	0.12443	0.759718	0.0924581	0.00268727	0.145136	124	450	3000	21.7214	0.12493	0.12443	0.746065	0.093706	0.0166391	0.14359
125	580.57	7279.97	2.86424	0.12593	0.12543	0.760277	0.093817	0.00230631	0.1436	125	450	3000	21.7214	0.12593	0.12543	0.746881	0.0951624	0.015863	0.142093
126	581.703	7306.39	2.92716	0.12693	0.12643	0.760764	0.0952155	0.00197086	0.14205	126	450	3000	21.7214	0.12693	0.12643	0.747669	0.0966696	0.0151065	0.140555
127	582.852	7333.22	2.99103	0.12793	0.12743	0.761182	0.0966566	0.00167655	0.140485	127	450	3000	21.7214	0.12793	0.12743	0.748423	0.0982286	0.0143689	0.138979
128	584.021	7360.48	3.05595	0.12893	0.12843	0.761533	0.0981437	0.00141922	0.138904	128	450	3000	21.7214	0.12893	0.12843	0.749141	0.0998402	0.0136497	0.137369
129	585.21	7388.23	3.12202	0.12993	0.12943	0.761818	0.0996801	0.00119501	0.137307	129	450	3000	21.7214	0.12993	0.12943	0.749821	0.101505	0.0129481	0.135726
130	586.422	7416.51	3.18934	0.13093	0.13043	0.762039	0.101269	0.00100037	0.135691	130	450	3000	21.7214	0.13093	0.13043	0.750458	0.103224	0.0122637	0.134054
131	587.658	7445.35	3.25801	0.13193	0.13143	0.762196	0.102915	0.00083192	0.134058	131	450	3000	21.7214	0.13193	0.13143	0.751051	0.104998	0.0115958	0.132355
132	588.92	7474.79	3.32812	0.13293	0.13243	0.762289	0.10462	0.000686608	0.132405	132	450	3000	21.7214	0.13293	0.13243	0.751598	0.106826	0.0109438	0.130632
133	590.218	7504.35	3.40022	0.13393	0.13343	0.762344	0.106407	0.000561662	0.130687	133	450	3000	21.7214	0.13393	0.13343	0.752096	0.108709	0.0103073	0.128888
134	591.588	7531.77	3.47638	0.13493	0.13443	0.762478	0.108354	0.000454412	0.128714	134	450	3000	21.7214	0.13493	0.13443	0.752544	0.110645	0.00968552	0.127126
135	592.989	7559.78	3.5542	0.13593	0.13543	0.762537	0.110375	0.000362149	0.126725	135	450	3000	21.7214	0.13593	0.13543	0.752939	0.112635	0.00907803	0.125347
136	594.421	7588.41	3.63374	0.13693	0.13643	0.762521	0.112474	0.000283206	0.124722	136	450	3000	21.7214	0.13693	0.13643	0.753282	0.114677	0.00848424	0.123557
137	595.885	7617.7	3.7151	0.13793	0.13743	0.762425	0.114657	0.000215745	0.122703	137	450	3000	21.7214	0.13793	0.13743	0.75357	0.11677	0.00790359	0.121757
138	597.384	7647.68	3.79837	0.13893	0.13843	0.762246	0.116927	0.000158009	0.120668	138	450	3000	21.7214	0.13893	0.13843	0.753802	0.118912	0.00733558	0.119951
139	598.919	7678.37	3.88363	0.13993	0.13943	0.761982	0.11929	0.000108583	0.118619	139	450	3000	21.7214	0.13993	0.13943	0.753978	0.121101	0.0067797	0.118141
140	600.491	7709.82	3.97098	0.14093	0.14043	0.761627	0.121752	6.6093e-05	0.116555	140	450	3000	21.7214	0.14093	0.14043	0.754098	0.123335	0.00623543	0.116332
141	602.103	7742.05	4.06051	0.14193	0.14143	0.761176	0.124318	2.93904e-05	0.114476	141	450	3000	21.7214	0.14193	0.14143	0.754161	0.125612	0.00570226	0.114525
142	603.384	7767.67	4.13167	0.14293	0.14243	0.760802	0.126363	2.49405e-05	0.11281	142	450	3000	21.7214	0.14293	0.14243	0.754169	0.127928	0.00517969	0.112723
143	604.694	7793.89	4.20449	0.14393	0.14343	0.760365	0.128484	2.1103e-05	0.111129	143	450	3000	21.7214	0.14393	0.14343	0.754124	0.130281	0.00466722	0.110928
144	606.036	7820.72	4.27901	0.14493	0.14443	0.759862	0.130685	1.77918e-05	0.109436	144	450	3000	21.7214	0.14493	0.14443	0.754026	0.132668	0.0041644	0.109141
145	607.409	7848.18	4.35529	0.14593	0.14543	0.759286	0.132969	1.49238e-05	0.10773	145	450	3000	21.7214	0.14593	0.14543	0.75388	0.135084	0.00367083	0.107365
146	608.815	7876.29	4.43339	0.14693	0.14643	0.758636	0.13534	1.25199e-05	0.106012	146	450	3000	21.7214	0.14693	0.14643	0.753689	0.137524	0.00318602	0.105602
147	610.254	7905.08	4.51335	0.14793	0.14743	0.757905	0.137803	1.04392e-05	0.104282	147	450	3000	21.7214	0.14793	0.14743	0.753457	0.139983	0.00270954	0.103851
148	611.728	7934.56	4.59524	0.14893	0.14843	0.757088	0.140362	8.6772e-06	0.102541	148	450	3000	21.7214	0.14893	0.14843	0.753189	0.142456	0.002241	0.102114
149	613.238	7964.76	4.67912	0.14993	0.14943	0.756182	0.143021	7.1654e-06	0.10079	149	450	3000	21.7214	0.14993	0.14943	0.752891	0.144935	0.00178	0.100394
150	614.785	7995.7	4.76506	0.15093	0.15043	0.755179	0.145787	5.93358e-06	0.0990284	150	450	3000	21.7214	0.15093	0.15043	0.75257	0.147414	0.00132611	0.0986898
151	616.37	8027.4	4.85312	0.15193	0.15143	0.754074	0.148664	4.87624e-06	0.0972573	151	450	3000	21.7214	0.15193	0.15143	0.752231	0.149886	0.000878929	0.0970034
152	617.995	8059.89	4.94338	0.15293	0.15243	0.75286	0.151658	3.9931e-06	0.0954776	152	450	3000	21.7214	0.15293	0.15243	0.751883	0.152342	0.000438104	0.0953361
153	619.66	8093.21	5.03591	0.15393	0.15343	0.751533	0.154775	3.26192e-06	0.093689	153	450	3000	21.7214	0.15393	0.15343	0.751533	0.154775	3.26192e-06	0.093689
Baynidir Path 2_3: Primary										Baynidir Path 2_3: Diffused
hell	temperature (｡C)	pressure (bar)	tot.time (my)	radius (cm)	X(node) (cm)	Xfe	Xmg	Xmn	Xca	hell	temperature (｡C)	pressure (bar)	tot.time (my)	radius (cm)	X(node) (cm)	Xfe	Xmg	Xmn	Xca
1	532.775	6393.29	0.208959	0.00100038	0.000500188	0.611003	0.0448051	0.151131	0.193061	1	450	3000	21.7214	0.00100038	0.000500188	0.702933	0.0511005	0.0632369	0.18273
2	533.081	6396.98	0.226003	0.00200086	0.00150062	0.612425	0.0450411	0.150172	0.192362	2	450	3000	21.7214	0.00200086	0.00150062	0.70298	0.0511157	0.0632138	0.182691
3	533.405	6400.86	0.24399	0.00300089	0.00250087	0.613925	0.0452912	0.149156	0.191628	3	450	3000	21.7214	0.00300089	0.00250087	0.703182	0.0511814	0.0631137	0.182523
4	533.746	6404.96	0.262947	0.00400128	0.00350109	0.615508	0.045556	0.148079	0.190857	4	450	3000	21.7214	0.00400128	0.00350109	0.703492	0.051282	0.0629601	0.182266
5	534.106	6409.27	0.282917	0.00500134	0.00450131	0.617175	0.0458363	0.146939	0.19005	5	450	3000	21.7214	0.00500134	0.00450131	0.703897	0.0514139	0.0627579	0.181931
6	534.484	6413.8	0.303905	0.00600144	0.00550139	0.618928	0.0461323	0.145735	0.189205	6	450	3000	21.7214	0.00600144	0.00550139	0.704391	0.0515755	0.0625092	0.181524
7	534.88	6418.56	0.325941	0.00700133	0.00650138	0.620769	0.0464447	0.144463	0.188323	7	450	3000	21.7214	0.00700133	0.00650138	0.70497	0.0517654	0.0622155	0.181049
8	535.296	6423.55	0.349041	0.00800134	0.00750133	0.6227	0.046774	0.143123	0.187404	8	450	3000	21.7214	0.00800134	0.00750133	0.705629	0.0519826	0.0618777	0.180511
9	535.731	6428.78	0.373226	0.00900126	0.0085013	0.624721	0.0471208	0.141711	0.186447	9	450	3000	21.7214	0.00900126	0.0085013	0.706362	0.0522259	0.0614969	0.179916
10	536.186	6434.24	0.398503	0.0100014	0.00950132	0.626835	0.0474855	0.140227	0.185453	10	450	3000	21.7214	0.0100014	0.00950132	0.707164	0.0524941	0.0610741	0.179268
11	536.661	6439.93	0.424886	0.0110014	0.0105014	0.629042	0.0478685	0.138668	0.184422	11	450	3000	21.7214	0.0110014	0.0105014	0.708029	0.0527859	0.0606105	0.178574
12	537.156	6445.87	0.452374	0.0120014	0.0115014	0.631341	0.0482702	0.137034	0.183355	12	450	3000	21.7214	0.0120014	0.0115014	0.708952	0.0530999	0.0601072	0.177841
13	537.671	6452.05	0.480971	0.0130014	0.0125014	0.633734	0.048691	0.135323	0.182252	13	450	3000	21.7214	0.0130014	0.0125014	0.709926	0.0534349	0.0595655	0.177074
14	538.205	6458.46	0.510673	0.0140015	0.0135014	0.636219	0.0491312	0.133534	0.181116	14	450	3000	21.7214	0.0140015	0.0135014	0.710943	0.0537893	0.0589868	0.176281
15	538.76	6465.12	0.541474	0.0150014	0.0145014	0.638796	0.0495911	0.131667	0.179946	15	450	3000	21.7214	0.0150014	0.0145014	0.711996	0.0541617	0.0583723	0.17547
16	539.334	6472.01	0.573367	0.0160015	0.0155015	0.641464	0.050071	0.129721	0.178744	16	450	3000	21.7214	0.0160015	0.0155015	0.71308	0.0545505	0.0577236	0.174646
17	539.927	6479.13	0.606335	0.0170014	0.0165015	0.644221	0.0505711	0.127696	0.177511	17	450	3000	21.7214	0.0170014	0.0165015	0.714185	0.0549543	0.0570422	0.173818
18	540.54	6486.48	0.640361	0.0180015	0.0175015	0.647066	0.0510916	0.125593	0.17625	18	450	3000	21.7214	0.0180015	0.0175015	0.715305	0.0553715	0.0563297	0.172993
19	541.171	6494.05	0.675424	0.0190015	0.0185015	0.649997	0.0516326	0.12341	0.174961	19	450	3000	21.7214	0.0190015	0.0185015	0.716433	0.0558006	0.0555876	0.172178
20	541.82	6501.84	0.711494	0.0200014	0.0195015	0.653009	0.0521941	0.12115	0.173646	20	450	3000	21.7214	0.0200014	0.0195015	0.717562	0.0562402	0.0548177	0.17138
21	542.487	6509.84	0.748545	0.0210014	0.0205014	0.656102	0.0527761	0.118814	0.172308	21	450	3000	21.7214	0.0210014	0.0205014	0.718686	0.056689	0.0540216	0.170603
22	543.171	6518.05	0.786544	0.0220014	0.0215014	0.65927	0.0533788	0.116402	0.170949	22	450	3000	21.7214	0.0220014	0.0215014	0.719798	0.0571457	0.0532011	0.169855
23	543.871	6526.46	0.825449	0.0230014	0.0225014	0.662511	0.0540018	0.113917	0.16957	23	450	3000	21.7214	0.0230014	0.0225014	0.720893	0.0576092	0.052358	0.16914
24	544.587	6535.05	0.865223	0.0240014	0.0235014	0.665819	0.0546452	0.111361	0.168174	24	450	3000	21.7214	0.0240014	0.0235014	0.721966	0.0580785	0.051494	0.168461
25	545.277	6543.32	0.903539	0.0249273	0.0244644	0.669002	0.0552712	0.108884	0.166842	25	450	3000	21.7214	0.0249273	0.0244644	0.722976	0.0585352	0.0506441	0.167845
26	545.84	6550.08	0.934825	0.0259273	0.0254273	0.671469	0.0557569	0.106322	0.166452	26	450	3000	21.7214	0.0259273	0.0254273	0.723958	0.058996	0.0497782	0.167267
27	546.43	6557.15	0.967573	0.0269273	0.0264273	0.674042	0.0562706	0.103649	0.166038	27	450	3000	21.7214	0.0269273	0.0264273	0.724948	0.0594785	0.0488638	0.166709
28	547.035	6564.41	1.00118	0.0279273	0.0274273	0.676674	0.0568036	0.100915	0.165608	28	450	3000	21.7214	0.0279273	0.0274273	0.725905	0.0599647	0.0479357	0.166194
29	547.655	6571.86	1.03563	0.0289273	0.0284273	0.67936	0.0573559	0.0981228	0.165161	29	450	3000	21.7214	0.0289273	0.0284273	0.726828	0.0604545	0.0469957	0.165722
30	548.289	6579.47	1.07089	0.0299274	0.0294274	0.682097	0.0579278	0.0952767	0.164699	30	450	3000	21.7214	0.0299274	0.0294274	0.727716	0.0609479	0.0460457	0.165291
31	548.938	6587.25	1.10692	0.0309274	0.0304274	0.68488	0.058519	0.0923805	0.16422	31	450	3000	21.7214	0.0309274	0.0304274	0.728569	0.061445	0.0450872	0.164898
32	549.599	6595.19	1.14368	0.0319274	0.0314274	0.687706	0.0591296	0.089439	0.163726	32	450	3000	21.7214	0.0319274	0.0314274	0.729389	0.061946	0.0441221	0.164543
33	550.243	6604.86	1.17943	0.0329275	0.0324275	0.690432	0.0597193	0.0864466	0.163403	33	450	3000	21.7214	0.0329275	0.0324275	0.730175	0.0624514	0.0431521	0.164221
34	550.852	6617.04	1.21327	0.0339275	0.0334275	0.692985	0.0602662	0.0834052	0.163344	34	450	3000	21.7214	0.0339275	0.0334275	0.730929	0.0629612	0.0421786	0.163931
35	551.471	6629.41	1.24762	0.0349275	0.0344275	0.695559	0.060828	0.0803379	0.163275	35	450	3000	21.7214	0.0349275	0.0344275	0.731653	0.063476	0.0412034	0.163668
36	552.097	6641.94	1.28244	0.0359275	0.0354275	0.698149	0.0614046	0.0772506	0.163196	36	450	3000	21.7214	0.0359275	0.0354275	0.732347	0.063996	0.0402278	0.163429
37	552.731	6654.62	1.31765	0.0369275	0.0364275	0.700748	0.0619954	0.0741504	0.163106	37	450	3000	21.7214	0.0369275	0.0364275	0.733014	0.0645217	0.0392533	0.163211
38	553.371	6667.43	1.35322	0.0379274	0.0374275	0.70335	0.0626	0.0710444	0.163006	38	450	3000	21.7214	0.0379274	0.0374275	0.733654	0.0650532	0.0382811	0.163011
39	554.017	6680.34	1.38907	0.0389275	0.0384275	0.705948	0.0632178	0.0679395	0.162895	39	450	3000	21.7214	0.0389275	0.0384275	0.734269	0.0655908	0.0373126	0.162827
40	554.667	6693.33	1.42516	0.0399275	0.0394275	0.708534	0.0638483	0.0648435	0.162774	40	450	3000	21.7214	0.0399275	0.0394275	0.734861	0.0661347	0.0363489	0.162656
41	555.319	6706.38	1.46141	0.0409274	0.0404274	0.711103	0.0644906	0.0617641	0.162642	41	450	3000	21.7214	0.0409274	0.0404274	0.735429	0.066685	0.0353911	0.162495
42	555.974	6719.47	1.49777	0.0419274	0.0414274	0.713646	0.0651443	0.0587088	0.1625	42	450	3000	21.7214	0.0419274	0.0414274	0.735976	0.0672419	0.0344403	0.162342
43	556.629	6732.58	1.53418	0.0429275	0.0424275	0.716157	0.0658086	0.0556854	0.162349	43	450	3000	21.7214	0.0429275	0.0424275	0.736501	0.0678055	0.0334973	0.162196
44	557.284	6745.68	1.57057	0.0439275	0.0434275	0.718628	0.0664827	0.0527018	0.162187	44	450	3000	21.7214	0.0439275	0.0434275	0.737007	0.0683758	0.0325631	0.162054
45	557.938	6758.76	1.60688	0.0449276	0.0444275	0.721052	0.0671658	0.0497655	0.162016	45	450	3000	21.7214	0.0449276	0.0444275	0.737493	0.0689531	0.0316386	0.161915
46	558.589	6771.78	1.64305	0.0459275	0.0454275	0.723422	0.0678572	0.0468841	0.161837	46	450	3000	21.7214	0.0459275	0.0454275	0.737961	0.0695375	0.0307244	0.161777
47	559.237	6784.73	1.67903	0.0469274	0.0464275	0.725731	0.0685562	0.0440648	0.161648	47	450	3000	21.7214	0.0469274	0.0464275	0.738412	0.0701294	0.0298214	0.161637
48	559.88	6797.6	1.71477	0.0479275	0.0474275	0.727972	0.069262	0.0413139	0.161452	48	450	3000	21.7214	0.0479275	0.0474275	0.738848	0.0707292	0.02893	0.161493
49	560.495	6811.54	1.74891	0.0489275	0.0484275	0.730042	0.0699386	0.038635	0.161385	49	450	3000	21.7214	0.0489275	0.0484275	0.739269	0.0713376	0.0280508	0.161343
50	561.098	6825.62	1.78243	0.0499275	0.0494275	0.732011	0.0706122	0.0360365	0.16134	50	450	3000	21.7214	0.0499275	0.0494275	0.739677	0.0719555	0.0271845	0.161183
51	561.695	6839.54	1.81558	0.0509275	0.0504275	0.733898	0.0712903	0.0335259	0.161286	51	450	3000	21.7214	0.0509275	0.0504275	0.740076	0.0725839	0.0263314	0.161009
52	562.284	6853.3	1.84833	0.0519275	0.0514275	0.735697	0.0719724	0.0311073	0.161224	52	450	3000	21.7214	0.0519275	0.0514275	0.740467	0.0732242	0.025492	0.160817
53	562.866	6866.88	1.88067	0.0529275	0.0524275	0.737404	0.0726583	0.0287848	0.161153	53	450	3000	21.7214	0.0529275	0.0524275	0.740854	0.073878	0.0246666	0.160602
54	563.44	6880.27	1.91257	0.0539275	0.0534275	0.739017	0.0733477	0.0265622	0.161073	54	450	3000	21.7214	0.0539275	0.0534275	0.741239	0.074547	0.0238555	0.160359
55	564.006	6893.48	1.94402	0.0549275	0.0544275	0.740531	0.0740405	0.0244418	0.160986	55	450	3000	21.7214	0.0549275	0.0544275	0.741625	0.0752333	0.0230592	0.160082
56	564.564	6906.5	1.97502	0.0559275	0.0554275	0.741946	0.0747368	0.0224258	0.160892	56	450	3000	21.7214	0.0559275	0.0554275	0.742018	0.0759393	0.0222777	0.159765
57	565.114	6919.33	2.00556	0.0569275	0.0564275	0.743258	0.0754365	0.0205156	0.16079	57	450	3000	21.7214	0.0569275	0.0564275	0.742419	0.0766673	0.0215112	0.159403
58	565.656	6931.98	2.03567	0.0579275	0.0574275	0.744467	0.0761399	0.018712	0.160681	58	450	3000	21.7214	0.0579275	0.0574275	0.742832	0.0774199	0.02076	0.158988
59	566.19	6944.44	2.06535	0.0589275	0.0584275	0.745572	0.0768475	0.0170147	0.160566	59	450	3000	21.7214	0.0589275	0.0584275	0.743261	0.0781996	0.020024	0.158516
60	566.717	6956.74	2.09463	0.0599275	0.0594275	0.746574	0.0775596	0.0154233	0.160443	60	450	3000	21.7214	0.0599275	0.0594275	0.743707	0.079009	0.0193034	0.15798
61	567.238	6968.88	2.12354	0.0609275	0.0604275	0.747472	0.0782769	0.0139363	0.160315	61	450	3000	21.7214	0.0609275	0.0604275	0.744174	0.0798505	0.0185981	0.157377
62	567.752	6980.87	2.1521	0.0619275	0.0614275	0.748268	0.0790002	0.0125522	0.16018	62	450	3000	21.7214	0.0619275	0.0614275	0.744662	0.0807266	0.0179082	0.156704
63	568.26	6992.74	2.18035	0.0629274	0.0624274	0.748963	0.0797303	0.0112683	0.160038	63	450	3000	21.7214	0.0629274	0.0624274	0.745171	0.0816392	0.0172335	0.155956
64	568.764	7004.5	2.20836	0.0639275	0.0634275	0.749559	0.0804683	0.0100819	0.159891	64	450	3000	21.7214	0.0639275	0.0634275	0.745702	0.0825905	0.0165739	0.155133
65	569.763	7027.81	2.26384	0.0649275	0.0644275	0.75091	0.0815365	0.00897317	0.15858	65	450	3000	21.7214	0.0649275	0.0644275	0.746254	0.083582	0.0159293	0.154235
66	570.831	7052.73	2.32319	0.0659275	0.0654275	0.752276	0.0826654	0.00795815	0.1571	66	450	3000	21.7214	0.0659275	0.0654275	0.746823	0.0846151	0.0152996	0.153262
67	571.897	7077.6	2.38239	0.0669275	0.0664275	0.753534	0.0838098	0.00703478	0.155621	67	450	3000	21.7214	0.0669275	0.0664275	0.747408	0.0856912	0.0146845	0.152216
68	572.962	7102.45	2.44156	0.0679275	0.0674275	0.75469	0.0849718	0.00619751	0.154141	68	450	3000	21.7214	0.0679275	0.0674275	0.748005	0.0868112	0.0140838	0.1511
69	574.028	7127.33	2.50081	0.0689276	0.0684275	0.755747	0.0861541	0.00544114	0.152658	69	450	3000	21.7214	0.0689276	0.0684275	0.74861	0.0879762	0.0134973	0.149916
70	575.098	7152.29	2.56025	0.0699275	0.0694275	0.756711	0.0873589	0.00476031	0.15117	70	450	3000	21.7214	0.0699275	0.0694275	0.749219	0.0891869	0.0129247	0.14867
71	576.174	7177.39	2.61999	0.0709275	0.0704275	0.757586	0.0885889	0.00414972	0.149675	71	450	3000	21.7214	0.0709275	0.0704275	0.749826	0.0904441	0.0123658	0.147364
72	577.257	7202.65	2.68015	0.0719275	0.0714275	0.758377	0.089847	0.00360406	0.148172	72	450	3000	21.7214	0.0719275	0.0714275	0.750427	0.0917486	0.0118202	0.146004
73	578.349	7228.14	2.74084	0.0729275	0.0724275	0.759086	0.0911358	0.00311825	0.14666	73	450	3000	21.7214	0.0729275	0.0724275	0.751018	0.0931014	0.0112878	0.144593
74	579.453	7253.9	2.80217	0.0739275	0.0734275	0.759718	0.0924581	0.00268727	0.145136	74	450	3000	21.7214	0.0739275	0.0734275	0.751594	0.0945031	0.0107682	0.143135
75	580.57	7279.97	2.86424	0.0749275	0.0744275	0.760277	0.093817	0.00230631	0.1436	75	450	3000	21.7214	0.0749275	0.0744275	0.75215	0.0959549	0.0102611	0.141634
76	581.703	7306.39	2.92716	0.0759275	0.0754275	0.760764	0.0952155	0.00197086	0.14205	76	450	3000	21.7214	0.0759275	0.0754275	0.752683	0.0974575	0.00976627	0.140093
77	582.852	7333.22	2.99103	0.0769275	0.0764275	0.761182	0.0966566	0.00167655	0.140485	77	450	3000	21.7214	0.0769275	0.0764275	0.753189	0.0990121	0.00928337	0.138516
78	584.021	7360.48	3.05595	0.0779275	0.0774275	0.761533	0.0981437	0.00141922	0.138904	78	450	3000	21.7214	0.0779275	0.0774275	0.753663	0.100619	0.00881212	0.136905
79	585.21	7388.23	3.12202	0.0789275	0.0784275	0.761818	0.0996801	0.00119501	0.137307	79	450	3000	21.7214	0.0789275	0.0784275	0.754105	0.10228	0.00835224	0.135263
80	586.422	7416.51	3.18934	0.0799276	0.0794275	0.762039	0.101269	0.00100037	0.135691	80	450	3000	21.7214	0.0799276	0.0794275	0.75451	0.103994	0.00790341	0.133593
81	587.658	7445.35	3.25801	0.0809276	0.0804276	0.762196	0.102915	0.00083192	0.134058	81	450	3000	21.7214	0.0809276	0.0804276	0.754875	0.105763	0.00746534	0.131896
82	588.92	7474.79	3.32812	0.0819276	0.0814276	0.762289	0.10462	0.000686608	0.132405	82	450	3000	21.7214	0.0819276	0.0814276	0.7552	0.107586	0.00703779	0.130176
83	590.218	7504.35	3.40022	0.0829276	0.0824276	0.762344	0.106407	0.000561662	0.130687	83	450	3000	21.7214	0.0829276	0.0824276	0.75548	0.109463	0.00662043	0.128436
84	591.588	7531.77	3.47638	0.0839276	0.0834276	0.762478	0.108354	0.000454412	0.128714	84	450	3000	21.7214	0.0839276	0.0834276	0.755716	0.111393	0.00621297	0.126678
85	592.989	7559.78	3.5542	0.0849276	0.0844276	0.762537	0.110375	0.000362149	0.126725	85	450	3000	21.7214	0.0849276	0.0844276	0.755904	0.113376	0.00581515	0.124905
86	594.421	7588.41	3.63374	0.0859276	0.0854276	0.762521	0.112474	0.000283206	0.124722	86	450	3000	21.7214	0.0859276	0.0854276	0.756043	0.11541	0.00542667	0.123121
87	595.885	7617.7	3.7151	0.0869276	0.0864276	0.762425	0.114657	0.000215745	0.122703	87	450	3000	21.7214	0.0869276	0.0864276	0.756131	0.117493	0.00504725	0.121328
88	597.384	7647.68	3.79837	0.0879276	0.0874276	0.762246	0.116927	0.000158009	0.120668	88	450	3000	21.7214	0.0879276	0.0874276	0.756169	0.119624	0.00467663	0.11953
89	598.919	7678.37	3.88363	0.0889276	0.0884276	0.761982	0.11929	0.000108583	0.118619	89	450	3000	21.7214	0.0889276	0.0884276	0.756154	0.121801	0.00431455	0.11773
90	600.491	7709.82	3.97098	0.0899275	0.0894275	0.761627	0.121752	6.6093e-05	0.116555	90	450	3000	21.7214	0.0899275	0.0894275	0.756088	0.12402	0.00396074	0.115931
91	602.103	7742.05	4.06051	0.0909274	0.0904274	0.761176	0.124318	2.93904e-05	0.114476	91	450	3000	21.7214	0.0909274	0.0904274	0.75597	0.126279	0.00361494	0.114136
92	603.384	7767.67	4.13167	0.0919273	0.0914274	0.760802	0.126363	2.49405e-05	0.11281	92	450	3000	21.7214	0.0919273	0.0914274	0.7558	0.128575	0.00327689	0.112347
93	604.694	7793.89	4.20449	0.0929274	0.0924274	0.760365	0.128484	2.1103e-05	0.111129	93	450	3000	21.7214	0.0929274	0.0924274	0.755582	0.130905	0.00294632	0.110567
94	606.036	7820.72	4.27901	0.0939274	0.0934274	0.759862	0.130685	1.77918e-05	0.109436	94	450	3000	21.7214	0.0939274	0.0934274	0.755316	0.133263	0.002623	0.108798
95	607.409	7848.18	4.35529	0.0949274	0.0944274	0.759286	0.132969	1.49238e-05	0.10773	95	450	3000	21.7214	0.0949274	0.0944274	0.755006	0.135645	0.00230673	0.107042
96	608.815	7876.29	4.43339	0.0959274	0.0954274	0.758636	0.13534	1.25199e-05	0.106012	96	450	3000	21.7214	0.0959274	0.0954274	0.754656	0.138046	0.00199725	0.1053
97	610.254	7905.08	4.51335	0.0969275	0.0964275	0.757905	0.137803	1.04392e-05	0.104282	97	450	3000	21.7214	0.0969275	0.0964275	0.754271	0.140459	0.00169435	0.103576
98	611.728	7934.56	4.59524	0.0979275	0.0974275	0.757088	0.140362	8.6772e-06	0.102541	98	450	3000	21.7214	0.0979275	0.0974275	0.753854	0.142878	0.00139781	0.10187
99	613.238	7964.76	4.67912	0.0989274	0.0984274	0.756182	0.143021	7.1654e-06	0.10079	99	450	3000	21.7214	0.0989274	0.0984274	0.753413	0.145295	0.00110743	0.100185
100	614.785	7995.7	4.76506	0.0999274	0.0994274	0.755179	0.145787	5.93358e-06	0.0990284	100	450	3000	21.7214	0.0999274	0.0994274	0.752954	0.147701	0.000822986	0.0985222
101	616.37	8027.4	4.85312	0.100927	0.100427	0.754074	0.148664	4.87624e-06	0.0972573	101	450	3000	21.7214	0.100927	0.100427	0.752482	0.150089	0.000544265	0.096884
102	617.995	8059.89	4.94338	0.101927	0.101427	0.75286	0.151658	3.9931e-06	0.0954776	102	450	3000	21.7214	0.101927	0.101427	0.752006	0.15245	0.000271089	0.0952722
103	619.66	8093.21	5.03591	0.102927	0.102427	0.751533	0.154775	3.26192e-06	0.093689	103	450	3000	21.7214	0.102927	0.102427	0.751533	0.154775	3.26192e-06	0.093689
Baynidir Path 2_5: Primary										Baynidir Path 2_5: Diffused
Shell	temperature (｡C)	pressure (bar)	tot.time (my)	radius (cm)	X(node) (cm)	Xfe	Xmg	Xmn	Xca	Shell	temperature (｡C)	pressure (bar)	tot.time (my)	radius (cm)	X(node) (cm)	Xfe	Xmg	Xmn	Xca
1	562.284	6853.3	1.84833	0.00100002	0.00050001	0.735697	0.0719724	0.0311073	0.161224	1	450	3000	21.7214	0.00100002	0.00050001	0.760394	0.0815721	0.000276068	0.157758
2	562.866	6866.88	1.88067	0.00200007	0.00150005	0.737404	0.0726583	0.0287848	0.161153	2	450	3000	21.7214	0.00200007	0.00150005	0.760393	0.0816043	0.000275902	0.157727
3	563.44	6880.27	1.91257	0.00300002	0.00250004	0.739017	0.0733477	0.0265622	0.161073	3	450	3000	21.7214	0.00300002	0.00250004	0.760391	0.0817439	0.000275182	0.15759
4	564.006	6893.48	1.94402	0.004	0.00350001	0.740531	0.0740405	0.0244418	0.160986	4	450	3000	21.7214	0.004	0.00350001	0.760388	0.0819583	0.000274078	0.15738
5	564.564	6906.5	1.97502	0.00500005	0.00450003	0.741946	0.0747368	0.0224258	0.160892	5	450	3000	21.7214	0.00500005	0.00450003	0.760387	0.0822409	0.000272624	0.1571
6	565.114	6919.33	2.00556	0.00600005	0.00550005	0.743258	0.0754365	0.0205156	0.16079	6	450	3000	21.7214	0.00600005	0.00550005	0.760389	0.0825889	0.000270836	0.156751
7	565.656	6931.98	2.03567	0.007	0.00650002	0.744467	0.0761399	0.018712	0.160681	7	450	3000	21.7214	0.007	0.00650002	0.760397	0.0830011	0.000268722	0.156333
8	566.19	6944.44	2.06535	0.00800002	0.00750001	0.745572	0.0768475	0.0170147	0.160566	8	450	3000	21.7214	0.00800002	0.00750001	0.760411	0.0834762	0.00026629	0.155846
9	566.717	6956.74	2.09463	0.00900002	0.00850002	0.746574	0.0775596	0.0154233	0.160443	9	450	3000	21.7214	0.00900002	0.00850002	0.760434	0.0840135	0.000263548	0.155289
10	567.238	6968.88	2.12354	0.01	0.00950003	0.747472	0.0782769	0.0139363	0.160315	10	450	3000	21.7214	0.01	0.00950003	0.760467	0.0846118	0.000260501	0.15466
11	567.752	6980.87	2.1521	0.011	0.0105	0.748268	0.0790002	0.0125522	0.16018	11	450	3000	21.7214	0.011	0.0105	0.760511	0.0852703	0.000257158	0.153961
12	568.26	6992.74	2.18035	0.012	0.0115	0.748963	0.0797303	0.0112683	0.160038	12	450	3000	21.7214	0.012	0.0115	0.760567	0.0859881	0.000253526	0.153192
13	568.764	7004.5	2.20836	0.0130001	0.0125	0.749559	0.0804683	0.0100819	0.159891	13	450	3000	21.7214	0.0130001	0.0125	0.760633	0.0867643	0.000249613	0.152353
14	569.763	7027.81	2.26384	0.014	0.0135	0.75091	0.0815365	0.00897317	0.15858	14	450	3000	21.7214	0.014	0.0135	0.76071	0.0875979	0.000245428	0.151446
15	570.831	7052.73	2.32319	0.015	0.0145	0.752276	0.0826654	0.00795815	0.1571	15	450	3000	21.7214	0.015	0.0145	0.760797	0.088488	0.00024098	0.150474
16	571.897	7077.6	2.38239	0.016	0.0155	0.753534	0.0838098	0.00703478	0.155621	16	450	3000	21.7214	0.016	0.0155	0.760891	0.089434	0.000236278	0.149439
17	572.962	7102.45	2.44156	0.017	0.0165	0.75469	0.0849718	0.00619751	0.154141	17	450	3000	21.7214	0.017	0.0165	0.760991	0.0904351	0.000231333	0.148343
18	574.028	7127.33	2.50081	0.0180001	0.0175001	0.755747	0.0861541	0.00544114	0.152658	18	450	3000	21.7214	0.0180001	0.0175001	0.761094	0.091491	0.000226154	0.147189
19	575.098	7152.29	2.56025	0.0190001	0.0185001	0.756711	0.0873589	0.00476031	0.15117	19	450	3000	21.7214	0.0190001	0.0185001	0.761197	0.092601	0.000220752	0.145981
20	576.174	7177.39	2.61999	0.02	0.0195	0.757586	0.0885889	0.00414972	0.149675	20	450	3000	21.7214	0.02	0.0195	0.761298	0.0937652	0.000215139	0.144722
21	577.257	7202.65	2.68015	0.021	0.0205	0.758377	0.089847	0.00360406	0.148172	21	450	3000	21.7214	0.021	0.0205	0.761393	0.0949835	0.000209327	0.143414
22	578.349	7228.14	2.74084	0.022	0.0215	0.759086	0.0911358	0.00311825	0.14666	22	450	3000	21.7214	0.022	0.0215	0.76148	0.096256	0.000203326	0.14206
23	579.453	7253.9	2.80217	0.023	0.0225	0.759718	0.0924581	0.00268727	0.145136	23	450	3000	21.7214	0.023	0.0225	0.761556	0.0975831	0.000197151	0.140664
24	580.57	7279.97	2.86424	0.024	0.0235	0.760277	0.093817	0.00230631	0.1436	24	450	3000	21.7214	0.024	0.0235	0.761618	0.098965	0.000190813	0.139226
25	581.703	7306.39	2.92716	0.025	0.0245	0.760764	0.0952155	0.00197086	0.14205	25	450	3000	21.7214	0.025	0.0245	0.761662	0.100402	0.000184325	0.137751
26	582.852	7333.22	2.99103	0.026	0.0255	0.761182	0.0966566	0.00167655	0.140485	26	450	3000	21.7214	0.026	0.0255	0.761687	0.101895	0.000177702	0.13624
27	584.021	7360.48	3.05595	0.027	0.0265	0.761533	0.0981437	0.00141922	0.138904	27	450	3000	21.7214	0.027	0.0265	0.76169	0.103444	0.000170956	0.134695
28	585.21	7388.23	3.12202	0.028	0.0275	0.761818	0.0996801	0.00119501	0.137307	28	450	3000	21.7214	0.028	0.0275	0.761669	0.105049	0.000164101	0.133118
29	586.422	7416.51	3.18934	0.0290001	0.0285	0.762039	0.101269	0.00100037	0.135691	29	450	3000	21.7214	0.0290001	0.0285	0.761621	0.106709	0.000157151	0.131513
30	587.658	7445.35	3.25801	0.0300001	0.0295001	0.762196	0.102915	0.00083192	0.134058	30	450	3000	21.7214	0.0300001	0.0295001	0.761544	0.108426	0.000150121	0.12988
31	588.92	7474.79	3.32812	0.0310001	0.0305001	0.762289	0.10462	0.000686608	0.132405	31	450	3000	21.7214	0.0310001	0.0305001	0.761436	0.110198	0.000143025	0.128224
32	590.218	7504.35	3.40022	0.0320001	0.0315001	0.762344	0.106407	0.000561662	0.130687	32	450	3000	21.7214	0.0320001	0.0315001	0.761295	0.112023	0.000135877	0.126546
33	591.588	7531.77	3.47638	0.0330001	0.0325001	0.762478	0.108354	0.000454412	0.128714	33	450	3000	21.7214	0.0330001	0.0325001	0.761119	0.113902	0.000128692	0.124851
34	592.989	7559.78	3.5542	0.0340001	0.0335001	0.762537	0.110375	0.000362149	0.126725	34	450	3000	21.7214	0.0340001	0.0335001	0.760906	0.115832	0.000121484	0.12314
35	594.421	7588.41	3.63374	0.0350001	0.0345001	0.762521	0.112474	0.000283206	0.124722	35	450	3000	21.7214	0.0350001	0.0345001	0.760656	0.117811	0.000114267	0.121419
36	595.885	7617.7	3.7151	0.0360002	0.0355001	0.762425	0.114657	0.000215745	0.122703	36	450	3000	21.7214	0.0360002	0.0355001	0.760367	0.119838	0.000107055	0.119689
37	597.384	7647.68	3.79837	0.0370001	0.0365001	0.762246	0.116927	0.000158009	0.120668	37	450	3000	21.7214	0.0370001	0.0365001	0.760037	0.121909	9.98639e-05	0.117954
38	598.919	7678.37	3.88363	0.0380001	0.0375001	0.761982	0.11929	0.000108583	0.118619	38	450	3000	21.7214	0.0380001	0.0375001	0.759668	0.124021	9.27064e-05	0.116219
39	600.491	7709.82	3.97098	0.039	0.0385	0.761627	0.121752	6.6093e-05	0.116555	39	450	3000	21.7214	0.039	0.0385	0.759258	0.126171	8.55967e-05	0.114486
40	602.103	7742.05	4.06051	0.0399999	0.0395	0.761176	0.124318	2.93904e-05	0.114476	40	450	3000	21.7214	0.0399999	0.0395	0.758808	0.128355	7.85484e-05	0.112758
41	603.384	7767.67	4.13167	0.0409999	0.0404999	0.760802	0.126363	2.49405e-05	0.11281	41	450	3000	21.7214	0.0409999	0.0404999	0.758321	0.130568	7.15747e-05	0.11104
42	604.694	7793.89	4.20449	0.0419999	0.0414999	0.760365	0.128484	2.1103e-05	0.111129	42	450	3000	21.7214	0.0419999	0.0414999	0.757798	0.132805	6.46884e-05	0.109333
43	606.036	7820.72	4.27901	0.043	0.0424999	0.759862	0.130685	1.77918e-05	0.109436	43	450	3000	21.7214	0.043	0.0424999	0.757241	0.135059	5.79025e-05	0.107641
44	607.409	7848.18	4.35529	0.0439999	0.0434999	0.759286	0.132969	1.49238e-05	0.10773	44	450	3000	21.7214	0.0439999	0.0434999	0.756655	0.137325	5.12299e-05	0.105969
45	608.815	7876.29	4.43339	0.045	0.0444999	0.758636	0.13534	1.25199e-05	0.106012	45	450	3000	21.7214	0.045	0.0444999	0.756044	0.139594	4.46823e-05	0.104318
46	610.254	7905.08	4.51335	0.046	0.0455	0.757905	0.137803	1.04392e-05	0.104282	46	450	3000	21.7214	0.046	0.0455	0.755412	0.141857	3.82712e-05	0.102693
47	611.728	7934.56	4.59524	0.047	0.0465	0.757088	0.140362	8.6772e-06	0.102541	47	450	3000	21.7214	0.047	0.0465	0.754766	0.144106	3.20081e-05	0.101096
48	613.238	7964.76	4.67912	0.0479999	0.0475	0.756182	0.143021	7.1654e-06	0.10079	48	450	3000	21.7214	0.0479999	0.0475	0.75411	0.14633	2.59036e-05	0.0995332
49	614.785	7995.7	4.76506	0.049	0.0484999	0.755179	0.145787	5.93358e-06	0.0990284	49	450	3000	21.7214	0.049	0.0484999	0.753453	0.14852	1.99676e-05	0.0980069
50	616.37	8027.4	4.85312	0.05	0.0495	0.754074	0.148664	4.87624e-06	0.0972573	50	450	3000	21.7214	0.05	0.0495	0.7528	0.150665	1.42092e-05	0.0965214
51	617.995	8059.89	4.94338	0.0509999	0.0505	0.75286	0.151658	3.9931e-06	0.0954776	51	450	3000	21.7214	0.0509999	0.0505	0.752157	0.152753	8.63793e-06	0.0950808
52	619.66	8093.21	5.03591	0.0519999	0.0514999	0.751533	0.154775	3.26192e-06	0.093689	52	450	3000	21.7214	0.0519999	0.0514999	0.751533	0.154775	3.26192e-06	0.093689
Baynidir Path 2_6: Primary										Baynidir Path 2_6: Diffused
Shell	temperature (｡C)	pressure (bar)	tot.time (my)	radius (cm)	X(node) (cm)	Xfe	Xmg	Xmn	Xca	hell	temperature (｡C)	pressure (bar)	tot.time (my)	radius (cm)	X(node) (cm)	Xfe	Xmg	Xmn	Xca
1	582.852	7333.22	2.99103	0.00100003	0.000500014	0.761182	0.0966566	0.00167655	0.140485	1	450	3000	21.7214	0.00100003	0.000500014	0.760655	0.118784	3.28591e-06	0.120558
2	584.021	7360.48	3.05595	0.002	0.00150002	0.761533	0.0981437	0.00141922	0.138904	2	450	3000	21.7214	0.002	0.00150002	0.760643	0.118861	3.28588e-06	0.120493
3	585.21	7388.23	3.12202	0.00300001	0.00250001	0.761818	0.0996801	0.00119501	0.137307	3	450	3000	21.7214	0.00300001	0.00250001	0.760589	0.119196	3.28572e-06	0.120212
4	586.422	7416.51	3.18934	0.00400008	0.00350004	0.762039	0.101269	0.00100037	0.135691	4	450	3000	21.7214	0.00400008	0.00350004	0.760506	0.119707	3.28547e-06	0.119783
5	587.658	7445.35	3.25801	0.00500012	0.0045001	0.762196	0.102915	0.00083192	0.134058	5	450	3000	21.7214	0.00500012	0.0045001	0.760395	0.120376	3.28513e-06	0.119226
6	588.92	7474.79	3.32812	0.0060001	0.00550011	0.762289	0.10462	0.000686608	0.132405	6	450	3000	21.7214	0.0060001	0.00550011	0.760256	0.121191	3.28472e-06	0.118551
7	590.218	7504.35	3.40022	0.00700013	0.00650011	0.762344	0.106407	0.000561662	0.130687	7	450	3000	21.7214	0.00700013	0.00650011	0.760087	0.122143	3.28423e-06	0.117767
8	591.588	7531.77	3.47638	0.00800013	0.00750013	0.762478	0.108354	0.000454412	0.128714	8	450	3000	21.7214	0.00800013	0.00750013	0.759887	0.123226	3.28366e-06	0.116884
9	592.989	7559.78	3.5542	0.00900012	0.00850012	0.762537	0.110375	0.000362149	0.126725	9	450	3000	21.7214	0.00900012	0.00850012	0.759657	0.124429	3.283e-06	0.11591
10	594.421	7588.41	3.63374	0.0100001	0.00950012	0.762521	0.112474	0.000283206	0.124722	10	450	3000	21.7214	0.0100001	0.00950012	0.759394	0.125746	3.28226e-06	0.114857
11	595.885	7617.7	3.7151	0.0110002	0.0105001	0.762425	0.114657	0.000215745	0.122703	11	450	3000	21.7214	0.0110002	0.0105001	0.759098	0.127165	3.28144e-06	0.113733
12	597.384	7647.68	3.79837	0.0120001	0.0115001	0.762246	0.116927	0.000158009	0.120668	12	450	3000	21.7214	0.0120001	0.0115001	0.758769	0.128679	3.28053e-06	0.112549
13	598.919	7678.37	3.88363	0.0130001	0.0125001	0.761982	0.11929	0.000108583	0.118619	13	450	3000	21.7214	0.0130001	0.0125001	0.758407	0.130276	3.27955e-06	0.111314
14	600.491	7709.82	3.97098	0.014	0.0135	0.761627	0.121752	6.6093e-05	0.116555	14	450	3000	21.7214	0.014	0.0135	0.758014	0.131946	3.27849e-06	0.110037
15	602.103	7742.05	4.06051	0.0149999	0.0144999	0.761176	0.124318	2.93904e-05	0.114476	15	450	3000	21.7214	0.0149999	0.0144999	0.75759	0.13368	3.27737e-06	0.108727
16	603.384	7767.67	4.13167	0.0159999	0.0154999	0.760802	0.126363	2.49405e-05	0.11281	16	450	3000	21.7214	0.0159999	0.0154999	0.757137	0.135464	3.27618e-06	0.107395
17	604.694	7793.89	4.20449	0.0169999	0.0164999	0.760365	0.128484	2.1103e-05	0.111129	17	450	3000	21.7214	0.0169999	0.0164999	0.75666	0.137289	3.27493e-06	0.106048
18	606.036	7820.72	4.27901	0.0179999	0.0174999	0.759862	0.130685	1.77918e-05	0.109436	18	450	3000	21.7214	0.0179999	0.0174999	0.75616	0.13914	3.27363e-06	0.104696
19	607.409	7848.18	4.35529	0.0189999	0.0184999	0.759286	0.132969	1.49238e-05	0.10773	19	450	3000	21.7214	0.0189999	0.0184999	0.755643	0.141006	3.2723e-06	0.103348
20	608.815	7876.29	4.43339	0.02	0.0194999	0.758636	0.13534	1.25199e-05	0.106012	20	450	3000	21.7214	0.02	0.0194999	0.755113	0.142872	3.27095e-06	0.102011
21	610.254	7905.08	4.51335	0.021	0.0205	0.757905	0.137803	1.04392e-05	0.104282	21	450	3000	21.7214	0.021	0.0205	0.754577	0.144725	3.26958e-06	0.100695
22	611.728	7934.56	4.59524	0.022	0.0215	0.757088	0.140362	8.6772e-06	0.102541	22	450	3000	21.7214	0.022	0.0215	0.754038	0.14655	3.26822e-06	0.0994083
23	613.238	7964.76	4.67912	0.0229999	0.0225	0.756182	0.143021	7.1654e-06	0.10079	23	450	3000	21.7214	0.0229999	0.0225	0.753504	0.148334	3.26687e-06	0.0981587
24	614.785	7995.7	4.76506	0.0239999	0.0234999	0.755179	0.145787	5.93358e-06	0.0990284	24	450	3000	21.7214	0.0239999	0.0234999	0.752981	0.150062	3.26555e-06	0.0969544
25	616.37	8027.4	4.85312	0.025	0.0245	0.754074	0.148664	4.87624e-06	0.0972573	25	450	3000	21.7214	0.025	0.0245	0.752474	0.15172	3.26428e-06	0.0958033
26	617.995	8059.89	4.94338	0.0259999	0.0255	0.75286	0.151658	3.9931e-06	0.0954776	26	450	3000	21.7214	0.0259999	0.0255	0.751989	0.153295	3.26306e-06	0.0947125
27	619.66	8093.21	5.03591	0.0269999	0.0264999	0.751533	0.154775	3.26192e-06	0.093689	27	450	3000	21.7214	0.0269999	0.0264999	0.751533	0.154775	3.26192e-06	0.093689

## Sheet: Baynidir Path3
Baynidir Path 3_1: Primary										Baynidir Path 3_1: Diffused
Shell	temperature (｡C)	pressure (bar)	tot.time (my)	radius (cm)	X(node) (cm)	Xfe	Xmg	Xmn	Xca	Shell	temperature (｡C)	pressure (bar)	tot.time (my)	radius (cm)	X(node) (cm)	Xfe	Xmg	Xmn	Xca
1	529.013	6348.16	0	0.002079	0.0010395	0.593624	0.04199	0.162511	0.201876	1	450	3000	21.7214	0.002079	0.0010395	0.5984	0.0421675	0.157661	0.201772
2	529.014	6348.16	1.1868e-05	0.00316885	0.00262392	0.593625	0.0419902	0.16251	0.201875	2	450	3000	21.7214	0.00316885	0.00262392	0.598436	0.0421696	0.157627	0.201768
3	529.014	6348.17	4.74722e-05	0.00423065	0.00369975	0.593627	0.0419907	0.162508	0.201874	3	450	3000	21.7214	0.00423065	0.00369975	0.598493	0.042173	0.157572	0.201761
4	529.015	6348.18	9.32489e-05	0.00507413	0.00465239	0.593631	0.0419913	0.162506	0.201872	4	450	3000	21.7214	0.00507413	0.00465239	0.598563	0.0421771	0.157506	0.201754
5	529.016	6348.2	0.000162762	0.0060514	0.00556276	0.593637	0.0419922	0.162502	0.201869	5	450	3000	21.7214	0.0060514	0.00556276	0.598645	0.042182	0.157428	0.201744
6	529.018	6348.22	0.000262792	0.00702384	0.00653762	0.593645	0.0419935	0.162497	0.201864	6	450	3000	21.7214	0.00702384	0.00653762	0.59875	0.0421882	0.157329	0.201733
7	529.021	6348.25	0.000400123	0.0080274	0.00752562	0.593657	0.0419953	0.16249	0.201858	7	450	3000	21.7214	0.0080274	0.00752562	0.598874	0.0421956	0.157212	0.201718
8	529.024	6348.28	0.000574752	0.00901467	0.00852104	0.593671	0.0419976	0.16248	0.201851	8	450	3000	21.7214	0.00901467	0.00852104	0.599017	0.0422042	0.157078	0.201702
9	529.028	6348.33	0.000793463	0.0100043	0.00950947	0.593689	0.0420005	0.162469	0.201841	9	450	3000	21.7214	0.0100043	0.00950947	0.599177	0.042214	0.156927	0.201682
10	529.032	6348.39	0.00106304	0.011	0.0105021	0.593712	0.042004	0.162455	0.20183	10	450	3000	21.7214	0.011	0.0105021	0.599357	0.0422251	0.156758	0.20166
11	529.038	6348.46	0.00139026	0.0120026	0.0115013	0.593739	0.0420083	0.162437	0.201815	11	450	3000	21.7214	0.0120026	0.0115013	0.599558	0.0422377	0.156569	0.201635
12	529.045	6348.54	0.00177512	0.0129997	0.0125011	0.593771	0.0420134	0.162417	0.201799	12	450	3000	21.7214	0.0129997	0.0125011	0.599779	0.0422516	0.156362	0.201607
13	529.053	6348.64	0.0022278	0.0140027	0.0135012	0.593808	0.0420193	0.162393	0.201779	13	450	3000	21.7214	0.0140027	0.0135012	0.600022	0.0422671	0.156135	0.201575
14	529.063	6348.75	0.00275169	0.0150023	0.0145025	0.593852	0.0420262	0.162366	0.201757	14	450	3000	21.7214	0.0150023	0.0145025	0.600287	0.0422843	0.155889	0.20154
15	529.074	6348.88	0.00335018	0.0160015	0.0155019	0.593901	0.0420341	0.162334	0.201731	15	450	3000	21.7214	0.0160015	0.0155019	0.600575	0.0423032	0.155622	0.2015
16	529.086	6349.03	0.00403005	0.0170042	0.0165028	0.593958	0.042043	0.162298	0.201701	16	450	3000	21.7214	0.0170042	0.0165028	0.600886	0.0423239	0.155334	0.201456
17	529.1	6349.2	0.00479808	0.018006	0.0175051	0.594021	0.0420531	0.162257	0.201668	17	450	3000	21.7214	0.018006	0.0175051	0.601223	0.0423467	0.155024	0.201407
18	529.115	6349.38	0.00565427	0.0190105	0.0185083	0.594093	0.0420643	0.162212	0.201631	18	450	3000	21.7214	0.0190105	0.0185083	0.601585	0.0423716	0.154691	0.201352
19	529.132	6349.59	0.0066088	0.0200075	0.019509	0.594172	0.0420769	0.162162	0.20159	19	450	3000	21.7214	0.0200075	0.019509	0.601973	0.0423988	0.154336	0.201292
20	529.151	6349.81	0.00766167	0.0210068	0.0205072	0.594259	0.0420908	0.162106	0.201544	20	450	3000	21.7214	0.0210068	0.0205072	0.602388	0.0424284	0.153958	0.201226
21	529.172	6350.07	0.00881965	0.0220046	0.0215057	0.594355	0.042106	0.162045	0.201494	21	450	3000	21.7214	0.0220046	0.0215057	0.602831	0.0424607	0.153556	0.201153
22	529.195	6350.34	0.0100895	0.0230056	0.0225051	0.59446	0.0421227	0.161978	0.201439	22	450	3000	21.7214	0.0230056	0.0225051	0.603305	0.0424958	0.153128	0.201072
23	529.22	6350.64	0.0114781	0.024006	0.0235058	0.594575	0.042141	0.161904	0.201379	23	450	3000	21.7214	0.024006	0.0235058	0.60381	0.0425341	0.152673	0.200982
24	529.247	6350.96	0.0129853	0.025006	0.024506	0.5947	0.0421609	0.161824	0.201314	24	450	3000	21.7214	0.025006	0.024506	0.604348	0.0425757	0.152192	0.200884
25	529.276	6351.32	0.014618	0.0260023	0.0255041	0.594836	0.0421824	0.161738	0.201244	25	450	3000	21.7214	0.0260023	0.0255041	0.604919	0.0426208	0.151684	0.200776
26	529.309	6351.7	0.0164067	0.0270012	0.0265017	0.594984	0.042206	0.161643	0.201167	26	450	3000	21.7214	0.0270012	0.0265017	0.605524	0.0426698	0.151148	0.200658
27	529.344	6352.13	0.0183887	0.0280017	0.0275014	0.595149	0.0422321	0.161538	0.201081	27	450	3000	21.7214	0.0280017	0.0275014	0.606167	0.042723	0.150582	0.200527
28	529.384	6352.61	0.0205944	0.029002	0.0285019	0.595332	0.0422612	0.161421	0.200986	28	450	3000	21.7214	0.029002	0.0285019	0.606849	0.0427807	0.149986	0.200384
29	529.428	6353.14	0.0230579	0.0300016	0.0295018	0.595536	0.0422937	0.16129	0.20088	29	450	3000	21.7214	0.0300016	0.0295018	0.60757	0.0428432	0.149359	0.200228
30	529.478	6353.74	0.0258164	0.0310013	0.0305015	0.595765	0.0423302	0.161143	0.200762	30	450	3000	21.7214	0.0310013	0.0305015	0.608331	0.0429108	0.148701	0.200057
31	529.534	6354.4	0.0289038	0.0320011	0.0315012	0.596021	0.042371	0.160979	0.200629	31	450	3000	21.7214	0.0320011	0.0315012	0.609135	0.0429839	0.148011	0.199871
32	529.596	6355.15	0.032354	0.0330016	0.0325014	0.596308	0.0424166	0.160795	0.200481	32	450	3000	21.7214	0.0330016	0.0325014	0.609983	0.0430629	0.147287	0.199667
33	529.665	6355.98	0.0362077	0.034002	0.0335018	0.596628	0.0424677	0.16059	0.200315	33	450	3000	21.7214	0.034002	0.0335018	0.610876	0.0431481	0.146529	0.199446
34	529.742	6356.91	0.0404921	0.0350024	0.0345022	0.596983	0.0425245	0.160361	0.200131	34	450	3000	21.7214	0.0350024	0.0345022	0.611816	0.0432399	0.145738	0.199207
35	529.828	6357.93	0.045241	0.0360029	0.0355026	0.597377	0.0425875	0.160107	0.199928	35	450	3000	21.7214	0.0360029	0.0355026	0.612803	0.0433387	0.144911	0.198947
36	529.922	6359.06	0.050485	0.0370033	0.0365031	0.597813	0.0426572	0.159826	0.199704	36	450	3000	21.7214	0.0370033	0.0365031	0.61384	0.0434448	0.144049	0.198667
37	530.026	6360.31	0.0562613	0.0380027	0.037503	0.598293	0.042734	0.159516	0.199457	37	450	3000	21.7214	0.0380027	0.037503	0.614926	0.0435586	0.143151	0.198364
38	530.14	6361.68	0.0625971	0.0390028	0.0385027	0.598819	0.0428185	0.159176	0.199187	38	450	3000	21.7214	0.0390028	0.0385027	0.616063	0.0436805	0.142217	0.198039
39	530.265	6363.18	0.0695264	0.0400029	0.0395028	0.599395	0.0429109	0.158803	0.198892	39	450	3000	21.7214	0.0400029	0.0395028	0.617253	0.0438109	0.141246	0.19769
40	530.401	6364.81	0.0770795	0.041003	0.0405029	0.600023	0.0430119	0.158395	0.198571	40	450	3000	21.7214	0.041003	0.0405029	0.618496	0.0439503	0.140238	0.197316
41	530.548	6366.58	0.0852837	0.0420028	0.0415029	0.600704	0.0431218	0.157951	0.198222	41	450	3000	21.7214	0.0420028	0.0415029	0.619793	0.0440989	0.139192	0.196916
42	530.708	6368.5	0.0941661	0.0430023	0.0425026	0.601443	0.043241	0.15747	0.197846	42	450	3000	21.7214	0.0430023	0.0425026	0.621144	0.0442572	0.13811	0.196489
43	530.881	6370.57	0.103761	0.0440024	0.0435024	0.602241	0.0433701	0.156948	0.197441	43	450	3000	21.7214	0.0440024	0.0435024	0.62255	0.0444255	0.136989	0.196035
44	531.067	6372.8	0.114087	0.0450022	0.0445023	0.6031	0.0435094	0.156385	0.197006	44	450	3000	21.7214	0.0450022	0.0445023	0.624012	0.0446044	0.135831	0.195553
45	531.267	6375.2	0.125177	0.0460022	0.0455022	0.604023	0.0436593	0.155778	0.19654	45	450	3000	21.7214	0.0460022	0.0455022	0.62553	0.0447941	0.134635	0.195041
46	531.48	6377.76	0.137054	0.0470023	0.0465023	0.605011	0.0438203	0.155126	0.196043	46	450	3000	21.7214	0.0470023	0.0465023	0.627105	0.0449951	0.133401	0.194499
47	531.709	6380.5	0.149737	0.0480024	0.0475024	0.606068	0.0439928	0.154427	0.195513	47	450	3000	21.7214	0.0480024	0.0475024	0.628735	0.0452077	0.13213	0.193927
48	531.952	6383.42	0.163252	0.0490025	0.0485024	0.607193	0.0441771	0.15368	0.19495	48	450	3000	21.7214	0.0490025	0.0485024	0.630421	0.0454324	0.130822	0.193324
49	532.21	6386.52	0.177614	0.0500024	0.0495024	0.60839	0.0443737	0.152882	0.194354	49	450	3000	21.7214	0.0500024	0.0495024	0.632163	0.0456694	0.129478	0.19269
50	532.484	6389.81	0.192844	0.0510024	0.0505024	0.609659	0.0445829	0.152033	0.193725	50	450	3000	21.7214	0.0510024	0.0505024	0.633959	0.0459192	0.128098	0.192024
51	532.775	6393.29	0.208959	0.0520027	0.0515026	0.611003	0.0448051	0.151131	0.193061	51	450	3000	21.7214	0.0520027	0.0515026	0.63581	0.0461821	0.126683	0.191325
52	533.081	6396.98	0.226003	0.0530032	0.052503	0.612425	0.0450411	0.150172	0.192362	52	450	3000	21.7214	0.0530032	0.052503	0.637715	0.0464587	0.125233	0.190594
53	533.405	6400.86	0.24399	0.0540033	0.0535032	0.613925	0.0452912	0.149156	0.191628	53	450	3000	21.7214	0.0540033	0.0535032	0.639672	0.046749	0.123749	0.18983
54	533.746	6404.96	0.262947	0.0550036	0.0545035	0.615508	0.045556	0.148079	0.190857	54	450	3000	21.7214	0.0550036	0.0545035	0.641679	0.0470534	0.122233	0.189035
55	534.106	6409.27	0.282917	0.0560037	0.0555037	0.617175	0.0458363	0.146939	0.19005	55	450	3000	21.7214	0.0560037	0.0555037	0.643736	0.0473722	0.120685	0.188207
56	534.484	6413.8	0.303905	0.0570038	0.0565038	0.618928	0.0461323	0.145735	0.189205	56	450	3000	21.7214	0.0570038	0.0565038	0.645839	0.0477056	0.119107	0.187349
57	534.88	6418.56	0.325941	0.0580037	0.0575038	0.620769	0.0464447	0.144463	0.188323	57	450	3000	21.7214	0.0580037	0.0575038	0.647987	0.0480537	0.117499	0.18646
58	535.296	6423.55	0.349041	0.0590037	0.0585037	0.6227	0.046774	0.143123	0.187404	58	450	3000	21.7214	0.0590037	0.0585037	0.650176	0.0484168	0.115864	0.185543
59	535.731	6428.78	0.373226	0.0600036	0.0595037	0.624721	0.0471208	0.141711	0.186447	59	450	3000	21.7214	0.0600036	0.0595037	0.652405	0.0487948	0.114202	0.184599
60	536.186	6434.24	0.398503	0.0610038	0.0605037	0.626835	0.0474855	0.140227	0.185453	60	450	3000	21.7214	0.0610038	0.0605037	0.654669	0.0491877	0.112514	0.18363
61	536.661	6439.93	0.424886	0.0620038	0.0615038	0.629042	0.0478685	0.138668	0.184422	61	450	3000	21.7214	0.0620038	0.0615038	0.656964	0.0495954	0.110802	0.182638
62	537.156	6445.87	0.452374	0.0630038	0.0625038	0.631341	0.0482702	0.137034	0.183355	62	450	3000	21.7214	0.0630038	0.0625038	0.659287	0.0500175	0.109068	0.181628
63	537.671	6452.05	0.480971	0.0640038	0.0635038	0.633734	0.048691	0.135323	0.182252	63	450	3000	21.7214	0.0640038	0.0635038	0.661632	0.0504537	0.107313	0.180602
64	538.205	6458.46	0.510673	0.0650038	0.0645038	0.636219	0.0491312	0.133534	0.181116	64	450	3000	21.7214	0.0650038	0.0645038	0.663993	0.0509035	0.105538	0.179566
65	538.76	6465.12	0.541474	0.0660038	0.0655038	0.638796	0.0495911	0.131667	0.179946	65	450	3000	21.7214	0.0660038	0.0655038	0.666365	0.0513661	0.103746	0.178523
66	539.334	6472.01	0.573367	0.0670039	0.0665038	0.641464	0.050071	0.129721	0.178744	66	450	3000	21.7214	0.0670039	0.0665038	0.668742	0.0518408	0.101937	0.177481
67	539.927	6479.13	0.606335	0.0680038	0.0675038	0.644221	0.0505711	0.127696	0.177511	67	450	3000	21.7214	0.0680038	0.0675038	0.671117	0.0523267	0.100113	0.176443
68	540.54	6486.48	0.640361	0.0690038	0.0685038	0.647066	0.0510916	0.125593	0.17625	68	450	3000	21.7214	0.0690038	0.0685038	0.673483	0.0528227	0.0982768	0.175417
69	541.171	6494.05	0.675424	0.0700039	0.0695038	0.649997	0.0516326	0.12341	0.174961	69	450	3000	21.7214	0.0700039	0.0695038	0.675835	0.0533278	0.0964288	0.174409
70	541.82	6501.84	0.711494	0.0710038	0.0705038	0.653009	0.0521941	0.12115	0.173646	70	450	3000	21.7214	0.0710038	0.0705038	0.678164	0.0538408	0.0945711	0.173424
71	542.487	6509.84	0.748545	0.0720038	0.0715038	0.656102	0.0527761	0.118814	0.172308	71	450	3000	21.7214	0.0720038	0.0715038	0.680464	0.0543607	0.0927055	0.17247
72	543.171	6518.05	0.786544	0.0730038	0.0725038	0.65927	0.0533788	0.116402	0.170949	72	450	3000	21.7214	0.0730038	0.0725038	0.682729	0.0548862	0.0908335	0.171551
73	543.871	6526.46	0.825449	0.0740038	0.0735038	0.662511	0.0540018	0.113917	0.16957	73	450	3000	21.7214	0.0740038	0.0735038	0.684954	0.0554165	0.088957	0.170673
74	544.587	6535.05	0.865223	0.0750038	0.0745038	0.665819	0.0546452	0.111361	0.168174	74	450	3000	21.7214	0.0750038	0.0745038	0.687132	0.0559504	0.0870777	0.169839
75	545.277	6543.32	0.903539	0.0759297	0.0754667	0.669002	0.0552712	0.108884	0.166842	75	450	3000	21.7214	0.0759297	0.0754667	0.689183	0.0564673	0.0852671	0.169083
76	545.84	6550.08	0.934825	0.0769296	0.0764297	0.671469	0.0557569	0.106322	0.166452	76	450	3000	21.7214	0.0769296	0.0764297	0.691182	0.0569862	0.0834574	0.168374
77	546.43	6557.15	0.967573	0.0779297	0.0774297	0.674042	0.0562706	0.103649	0.166038	77	450	3000	21.7214	0.0779297	0.0774297	0.693203	0.0575268	0.0815804	0.16769
78	547.035	6564.41	1.00118	0.0789297	0.0784297	0.676674	0.0568036	0.100915	0.165608	78	450	3000	21.7214	0.0789297	0.0784297	0.695164	0.0580688	0.0797078	0.16706
79	547.655	6571.86	1.03563	0.0799297	0.0794297	0.67936	0.0573559	0.0981228	0.165161	79	450	3000	21.7214	0.0799297	0.0794297	0.697064	0.058612	0.0778413	0.166483
80	548.289	6579.47	1.07089	0.0809297	0.0804297	0.682097	0.0579278	0.0952767	0.164699	80	450	3000	21.7214	0.0809297	0.0804297	0.698902	0.0591562	0.0759828	0.165959
81	548.938	6587.25	1.10692	0.0819298	0.0814297	0.68488	0.058519	0.0923805	0.16422	81	450	3000	21.7214	0.0819298	0.0814297	0.700678	0.0597016	0.0741339	0.165486
82	549.599	6595.19	1.14368	0.0829298	0.0824298	0.687706	0.0591296	0.089439	0.163726	82	450	3000	21.7214	0.0829298	0.0824298	0.702393	0.0602481	0.0722964	0.165063
83	550.243	6604.86	1.17943	0.0839299	0.0834298	0.690432	0.0597193	0.0864466	0.163403	83	450	3000	21.7214	0.0839299	0.0834298	0.704046	0.0607961	0.0704719	0.164686
84	550.852	6617.04	1.21327	0.0849299	0.0844299	0.692985	0.0602662	0.0834052	0.163344	84	450	3000	21.7214	0.0849299	0.0844299	0.705639	0.0613456	0.0686619	0.164353
85	551.471	6629.41	1.24762	0.0859298	0.0854299	0.695559	0.060828	0.0803379	0.163275	85	450	3000	21.7214	0.0859298	0.0854299	0.707174	0.0618968	0.0668681	0.164061
86	552.097	6641.94	1.28244	0.0869299	0.0864299	0.698149	0.0614046	0.0772506	0.163196	86	450	3000	21.7214	0.0869299	0.0864299	0.70865	0.0624498	0.0650916	0.163808
87	552.731	6654.62	1.31765	0.0879298	0.0874299	0.700748	0.0619954	0.0741504	0.163106	87	450	3000	21.7214	0.0879298	0.0874299	0.71007	0.0630046	0.0633338	0.163592
88	553.371	6667.43	1.35322	0.0889298	0.0884298	0.70335	0.0626	0.0710444	0.163006	88	450	3000	21.7214	0.0889298	0.0884298	0.711433	0.0635611	0.0615961	0.163409
89	554.017	6680.34	1.38907	0.0899298	0.0894298	0.705948	0.0632178	0.0679395	0.162895	89	450	3000	21.7214	0.0899298	0.0894298	0.712742	0.064119	0.0598793	0.16326
90	554.667	6693.33	1.42516	0.0909298	0.0904298	0.708534	0.0638483	0.0648435	0.162774	90	450	3000	21.7214	0.0909298	0.0904298	0.713996	0.0646781	0.0581844	0.163142
91	555.319	6706.38	1.46141	0.0919298	0.0914298	0.711103	0.0644906	0.0617641	0.162642	91	450	3000	21.7214	0.0919298	0.0914298	0.715195	0.0652378	0.0565125	0.163055
92	555.974	6719.47	1.49777	0.0929298	0.0924298	0.713646	0.0651443	0.0587088	0.1625	92	450	3000	21.7214	0.0929298	0.0924298	0.71634	0.0657979	0.0548644	0.162998
93	556.629	6732.58	1.53418	0.0939299	0.0934298	0.716157	0.0658086	0.0556854	0.162349	93	450	3000	21.7214	0.0939299	0.0934298	0.717431	0.0663576	0.0532406	0.162971
94	557.284	6745.68	1.57057	0.0949299	0.0944299	0.718628	0.0664827	0.0527018	0.162187	94	450	3000	21.7214	0.0949299	0.0944299	0.718468	0.0669166	0.0516419	0.162974
95	557.938	6758.76	1.60688	0.0959299	0.0954299	0.721052	0.0671658	0.0497655	0.162016	95	450	3000	21.7214	0.0959299	0.0954299	0.719451	0.0674744	0.0500688	0.163006
96	558.589	6771.78	1.64305	0.0969299	0.0964299	0.723422	0.0678572	0.0468841	0.161837	96	450	3000	21.7214	0.0969299	0.0964299	0.72038	0.0680305	0.048522	0.163067
97	559.237	6784.73	1.67903	0.0979298	0.0974298	0.725731	0.0685562	0.0440648	0.161648	97	450	3000	21.7214	0.0979298	0.0974298	0.721257	0.0685849	0.0470019	0.163156
98	559.88	6797.6	1.71477	0.0989298	0.0984298	0.727972	0.069262	0.0413139	0.161452	98	450	3000	21.7214	0.0989298	0.0984298	0.722083	0.0691377	0.0455086	0.16327
99	560.419	6815.35	1.74469	0.0999298	0.0994298	0.729724	0.0698242	0.0386235	0.161828	99	450	3000	21.7214	0.0999298	0.0994298	0.722859	0.069689	0.0440426	0.163409
100	560.929	6834.05	1.77302	0.10093	0.10043	0.731306	0.0703556	0.0360136	0.162325	100	450	3000	21.7214	0.10093	0.10043	0.723588	0.0702395	0.0426041	0.163568
101	561.432	6852.51	1.80099	0.10193	0.10143	0.732809	0.0708898	0.0334943	0.162807	101	450	3000	21.7214	0.10193	0.10143	0.724272	0.0707901	0.0411934	0.163744
102	561.929	6870.72	1.82859	0.10293	0.10243	0.73423	0.0714269	0.0310696	0.163274	102	450	3000	21.7214	0.10293	0.10243	0.724915	0.0713418	0.0398106	0.163933
103	562.418	6888.67	1.85578	0.10393	0.10343	0.735564	0.0719666	0.0287435	0.163726	103	450	3000	21.7214	0.10393	0.10343	0.725519	0.0718963	0.0384557	0.164129
104	562.9	6906.35	1.88257	0.10493	0.10443	0.736809	0.0725087	0.0265191	0.164163	104	450	3000	21.7214	0.10493	0.10443	0.726091	0.072455	0.0371289	0.164325
105	563.375	6923.75	1.90894	0.10593	0.10543	0.737963	0.0730534	0.0243988	0.164585	105	450	3000	21.7214	0.10593	0.10543	0.726633	0.0730201	0.0358302	0.164517
106	563.842	6940.89	1.9349	0.10693	0.10643	0.739022	0.0736007	0.0223842	0.164993	106	450	3000	21.7214	0.10693	0.10643	0.72715	0.0735938	0.0345593	0.164697
107	564.302	6957.75	1.96045	0.10793	0.10743	0.739987	0.0741507	0.0204765	0.165386	107	450	3000	21.7214	0.10793	0.10743	0.727647	0.0741783	0.0333163	0.164858
108	564.755	6974.34	1.98559	0.10893	0.10843	0.740855	0.0747037	0.0186765	0.165765	108	450	3000	21.7214	0.10893	0.10843	0.728129	0.074776	0.0321011	0.164994
109	565.2	6990.68	2.01035	0.10993	0.10943	0.741626	0.07526	0.0169836	0.166131	109	450	3000	21.7214	0.10993	0.10943	0.7286	0.0753893	0.0309136	0.165097
110	565.639	7006.77	2.03473	0.11093	0.11043	0.7423	0.07582	0.015397	0.166483	110	450	3000	21.7214	0.11093	0.11043	0.729063	0.0760208	0.0297532	0.165163
111	566.072	7022.64	2.05878	0.11193	0.11143	0.742877	0.0763843	0.0139151	0.166824	111	450	3000	21.7214	0.11193	0.11143	0.729523	0.0766728	0.0286198	0.165185
112	566.499	7038.3	2.0825	0.11293	0.11243	0.743358	0.0769535	0.0125361	0.167152	112	450	3000	21.7214	0.11293	0.11243	0.729981	0.0773476	0.027513	0.165158
113	566.921	7053.78	2.10596	0.11393	0.11343	0.743745	0.0775284	0.0112573	0.167469	113	450	3000	21.7214	0.11393	0.11343	0.73044	0.0780472	0.0264324	0.16508
114	567.339	7069.09	2.12916	0.11493	0.11443	0.744038	0.0781095	0.0100757	0.167777	114	450	3000	21.7214	0.11493	0.11443	0.730901	0.0787735	0.0253775	0.164948
115	567.528	7076.02	2.13966	0.115202	0.115066	0.744155	0.078375	0.00955601	0.167914	115	450	3000	21.7214	0.115202	0.115066	0.731196	0.0792504	0.0247197	0.164834
116	568.281	7103.65	2.18151	0.116202	0.115702	0.744842	0.0790533	0.00868453	0.16742	116	450	3000	21.7214	0.116202	0.115702	0.731491	0.0797391	0.0240719	0.164698
117	569.178	7136.53	2.23133	0.117202	0.116702	0.745578	0.0798816	0.00769733	0.166844	117	450	3000	21.7214	0.117202	0.116702	0.731956	0.0805319	0.0230738	0.164438
118	570.077	7169.48	2.28126	0.118202	0.117702	0.746226	0.080725	0.00680012	0.166249	118	450	3000	21.7214	0.118202	0.117702	0.732422	0.0813561	0.0220998	0.164122
119	570.979	7202.56	2.33138	0.119202	0.118702	0.746789	0.0815853	0.0059881	0.165637	119	450	3000	21.7214	0.119202	0.118702	0.732885	0.0822122	0.0211493	0.163754
120	571.887	7235.84	2.38181	0.120202	0.119702	0.747273	0.0824644	0.00525562	0.165007	120	450	3000	21.7214	0.120202	0.119702	0.733342	0.0831011	0.0202217	0.163335
121	572.802	7269.39	2.43265	0.121202	0.120702	0.747681	0.0833643	0.00459707	0.164357	121	450	3000	21.7214	0.121202	0.120702	0.73379	0.084023	0.0193163	0.162871
122	573.726	7303.27	2.48398	0.122202	0.121702	0.748017	0.0842871	0.00400706	0.163688	122	450	3000	21.7214	0.122202	0.121702	0.734224	0.0849781	0.0184327	0.162365
123	574.661	7337.56	2.53593	0.123202	0.122702	0.748285	0.085235	0.00348034	0.163	123	450	3000	21.7214	0.123202	0.122702	0.73464	0.0859661	0.01757	0.161824
124	575.608	7372.3	2.58858	0.124202	0.123702	0.748487	0.0862101	0.00301181	0.162291	124	450	3000	21.7214	0.124202	0.123702	0.735032	0.0869868	0.0167277	0.161254
125	576.57	7407.58	2.64203	0.125202	0.124702	0.748627	0.0872147	0.00259648	0.161562	125	450	3000	21.7214	0.125202	0.124702	0.735394	0.0880394	0.0159053	0.160661
126	577.549	7443.46	2.69639	0.126202	0.125702	0.748708	0.0882513	0.00222969	0.160811	126	450	3000	21.7214	0.126202	0.125702	0.735722	0.0891232	0.0151019	0.160053
127	578.545	7480	2.75175	0.127202	0.126702	0.748733	0.0893224	0.00190684	0.160038	127	450	3000	21.7214	0.127202	0.126702	0.73601	0.0902368	0.014317	0.159436
128	579.562	7517.26	2.80821	0.128202	0.127702	0.748702	0.0904305	0.00162376	0.159243	128	450	3000	21.7214	0.128202	0.127702	0.736252	0.091379	0.01355	0.158819
129	580.599	7555.31	2.86586	0.129202	0.128702	0.74862	0.0915783	0.00137641	0.158426	129	450	3000	21.7214	0.129202	0.128702	0.736443	0.092548	0.0128003	0.158209
130	581.66	7594.21	2.92481	0.130202	0.129702	0.748486	0.0927686	0.00116103	0.157585	130	450	3000	21.7214	0.130202	0.129702	0.736578	0.0937417	0.0120672	0.157613
131	582.746	7634.03	2.98514	0.131202	0.130702	0.748302	0.0940043	0.000974124	0.156719	131	450	3000	21.7214	0.131202	0.130702	0.736654	0.0949581	0.0113502	0.157038
132	583.859	7674.82	3.04695	0.132202	0.131702	0.748069	0.0952885	0.000812485	0.15583	132	450	3000	21.7214	0.132202	0.131702	0.736666	0.0961947	0.0106487	0.15649
133	585	7716.65	3.11033	0.133202	0.132702	0.747787	0.0966244	0.000673144	0.154915	133	450	3000	21.7214	0.133202	0.132702	0.736614	0.0974489	0.00996205	0.155975
134	586.171	7759.59	3.17539	0.134202	0.133702	0.747457	0.0980153	0.000553375	0.153975	134	450	3000	21.7214	0.134202	0.133702	0.736494	0.0987181	0.00928978	0.155498
135	587.373	7803.69	3.24221	0.135202	0.134702	0.747077	0.0994648	0.000450727	0.153008	135	450	3000	21.7214	0.135202	0.134702	0.736308	0.0999994	0.00863134	0.155061
136	588.609	7849.01	3.31088	0.136202	0.135702	0.746646	0.100976	0.000362962	0.152014	136	450	3000	21.7214	0.136202	0.135702	0.736057	0.10129	0.00798622	0.154667
137	589.881	7895.63	3.38151	0.137202	0.136702	0.746165	0.102554	0.000288064	0.150993	137	450	3000	21.7214	0.137202	0.136702	0.735742	0.102588	0.00735392	0.154316
138	590.936	7956.16	3.44014	0.138202	0.137702	0.74476	0.103705	0.00022177	0.151313	138	450	3000	21.7214	0.138202	0.137702	0.735368	0.10389	0.00673394	0.154009
139	591.998	8019.86	3.49913	0.139202	0.138702	0.743196	0.104856	0.000172908	0.151776	139	450	3000	21.7214	0.139202	0.138702	0.734938	0.105193	0.00612578	0.153743
140	593.095	8085.69	3.56008	0.140202	0.139702	0.741565	0.106059	0.000129118	0.152247	140	450	3000	21.7214	0.140202	0.139702	0.734459	0.106496	0.00552897	0.153515
141	594.229	8153.72	3.62308	0.141202	0.140702	0.739863	0.107318	9.21052e-05	0.152727	141	450	3000	21.7214	0.141202	0.140702	0.733937	0.107797	0.00494308	0.153323
142	595.427	8222.76	3.68964	0.142202	0.141702	0.738178	0.108689	6.06855e-05	0.153073	142	450	3000	21.7214	0.142202	0.141702	0.733378	0.109094	0.00436768	0.153161
143	596.718	8291.63	3.76138	0.143202	0.142702	0.736594	0.110233	3.36192e-05	0.15314	143	450	3000	21.7214	0.143202	0.142702	0.732788	0.110384	0.00380226	0.153026
144	598.054	8362.88	3.8356	0.144202	0.143702	0.734938	0.111852	9.50902e-06	0.1532	144	450	3000	21.7214	0.144202	0.143702	0.732175	0.111667	0.00324637	0.152912
145	599.127	8420.12	3.89521	0.145202	0.144702	0.73366	0.113147	8.02254e-06	0.153185	145	450	3000	21.7214	0.145202	0.144702	0.731543	0.112941	0.00269961	0.152816
146	600.233	8479.1	3.95666	0.146202	0.145702	0.732332	0.114497	6.78113e-06	0.153164	146	450	3000	21.7214	0.146202	0.145702	0.7309	0.114204	0.00216158	0.152734
147	601.373	8539.89	4.01998	0.147202	0.146702	0.730952	0.115905	5.68861e-06	0.153137	147	450	3000	21.7214	0.147202	0.146702	0.730249	0.115456	0.0016319	0.152662
148	602.548	8602.57	4.08526	0.148202	0.147702	0.729517	0.117376	4.74218e-06	0.153103	148	450	3000	21.7214	0.148202	0.147702	0.729596	0.116696	0.00111013	0.152598
149	603.76	8667.19	4.15258	0.149202	0.148702	0.728023	0.118911	3.96723e-06	0.153062	149	450	3000	21.7214	0.149202	0.148702	0.728944	0.117921	0.000595824	0.152538
150	603.969	8678.36	4.16421	0.149372	0.149287	0.727764	0.119178	3.84522e-06	0.153054	150	450	3000	21.7214	0.149372	0.149287	0.728565	0.118631	0.000298362	0.152505
151	604.274	8694.63	4.18115	0.150372	0.149872	0.728189	0.119336	3.31207e-06	0.152472	151	450	3000	21.7214	0.150372	0.149872	0.728189	0.119336	3.31207e-06	0.152472
Baynidir Path 3_3: Primary										Baynidir Path 3_3: Diffused
shell	temperature (｡C	) pressure (bar)	tot.time (my)	radius (cm)	X(node) (cm)	Xfe	Xmg	Xmn	Xca	shell	temperature (｡C	) pressure (bar)	tot.time (my)	radius (cm)	X(node) (cm)	Xfe	Xmg	Xmn	Xca
1	532.775	6393.29	0.208959	0.00100038	0.000500188	0.611003	0.0448051	0.151131	0.193061	1	450	3000	21.7214	0.00100038	0.000500188	0.702966	0.0511063	0.0632096	0.182718
2	533.081	6396.98	0.226003	0.00200086	0.00150062	0.612425	0.0450411	0.150172	0.192362	2	450	3000	21.7214	0.00200086	0.00150062	0.703013	0.0511215	0.0631865	0.182679
3	533.405	6400.86	0.24399	0.00300089	0.00250087	0.613925	0.0452912	0.149156	0.191628	3	450	3000	21.7214	0.00300089	0.00250087	0.703215	0.0511871	0.0630869	0.182511
4	533.746	6404.96	0.262947	0.00400128	0.00350109	0.615508	0.045556	0.148079	0.190857	4	450	3000	21.7214	0.00400128	0.00350109	0.703523	0.0512877	0.0629339	0.182255
5	534.106	6409.27	0.282917	0.00500134	0.00450131	0.617175	0.0458363	0.146939	0.19005	5	450	3000	21.7214	0.00500134	0.00450131	0.703928	0.0514195	0.0627325	0.18192
6	534.484	6413.8	0.303905	0.00600144	0.00550139	0.618928	0.0461323	0.145735	0.189205	6	450	3000	21.7214	0.00600144	0.00550139	0.704421	0.051581	0.062485	0.181513
7	534.88	6418.56	0.325941	0.00700133	0.00650138	0.620769	0.0464447	0.144463	0.188323	7	450	3000	21.7214	0.00700133	0.00650138	0.704998	0.0517708	0.0621925	0.181039
8	535.296	6423.55	0.349041	0.00800134	0.00750133	0.6227	0.046774	0.143123	0.187404	8	450	3000	21.7214	0.00800134	0.00750133	0.705655	0.0519879	0.0618562	0.180501
9	535.731	6428.78	0.373226	0.00900126	0.0085013	0.624721	0.0471208	0.141711	0.186447	9	450	3000	21.7214	0.00900126	0.0085013	0.706386	0.052231	0.061477	0.179906
10	536.186	6434.24	0.398503	0.0100014	0.00950132	0.626835	0.0474855	0.140227	0.185453	10	450	3000	21.7214	0.0100014	0.00950132	0.707186	0.052499	0.061056	0.179259
11	536.661	6439.93	0.424886	0.0110014	0.0105014	0.629042	0.0478685	0.138668	0.184422	11	450	3000	21.7214	0.0110014	0.0105014	0.708049	0.0527906	0.0605942	0.178566
12	537.156	6445.87	0.452374	0.0120014	0.0115014	0.631341	0.0482702	0.137034	0.183355	12	450	3000	21.7214	0.0120014	0.0115014	0.70897	0.0531045	0.060093	0.177833
13	537.671	6452.05	0.480971	0.0130014	0.0125014	0.633734	0.048691	0.135323	0.182252	13	450	3000	21.7214	0.0130014	0.0125014	0.70994	0.0534392	0.0595535	0.177067
14	538.205	6458.46	0.510673	0.0140015	0.0135014	0.636219	0.0491312	0.133534	0.181116	14	450	3000	21.7214	0.0140015	0.0135014	0.710955	0.0537934	0.058977	0.176275
15	538.76	6465.12	0.541474	0.0150014	0.0145014	0.638796	0.0495911	0.131667	0.179946	15	450	3000	21.7214	0.0150014	0.0145014	0.712006	0.0541656	0.058365	0.175464
16	539.334	6472.01	0.573367	0.0160015	0.0155015	0.641464	0.050071	0.129721	0.178744	16	450	3000	21.7214	0.0160015	0.0155015	0.713086	0.0545542	0.0577188	0.174641
17	539.927	6479.13	0.606335	0.0170014	0.0165015	0.644221	0.0505711	0.127696	0.177511	17	450	3000	21.7214	0.0170014	0.0165015	0.714189	0.0549578	0.05704	0.173814
18	540.54	6486.48	0.640361	0.0180015	0.0175015	0.647066	0.0510916	0.125593	0.17625	18	450	3000	21.7214	0.0180015	0.0175015	0.715306	0.0553747	0.0563301	0.172989
19	541.171	6494.05	0.675424	0.0190015	0.0185015	0.649997	0.0516326	0.12341	0.174961	19	450	3000	21.7214	0.0190015	0.0185015	0.716431	0.0558036	0.0555907	0.172175
20	541.82	6501.84	0.711494	0.0200014	0.0195015	0.653009	0.0521941	0.12115	0.173646	20	450	3000	21.7214	0.0200014	0.0195015	0.717556	0.056243	0.0548234	0.171377
21	542.487	6509.84	0.748545	0.0210014	0.0205014	0.656102	0.0527761	0.118814	0.172308	21	450	3000	21.7214	0.0210014	0.0205014	0.718677	0.0566915	0.0540301	0.170602
22	543.171	6518.05	0.786544	0.0220014	0.0215014	0.65927	0.0533788	0.116402	0.170949	22	450	3000	21.7214	0.0220014	0.0215014	0.719785	0.0571479	0.0532123	0.169854
23	543.871	6526.46	0.825449	0.0230014	0.0225014	0.662511	0.0540018	0.113917	0.16957	23	450	3000	21.7214	0.0230014	0.0225014	0.720877	0.0576111	0.0523718	0.16914
24	544.587	6535.05	0.865223	0.0240014	0.0235014	0.665819	0.0546452	0.111361	0.168174	24	450	3000	21.7214	0.0240014	0.0235014	0.721947	0.0580801	0.0515105	0.168462
25	545.277	6543.32	0.903539	0.0249273	0.0244644	0.669002	0.0552712	0.108884	0.166842	25	450	3000	21.7214	0.0249273	0.0244644	0.722953	0.0585365	0.0506631	0.167847
26	545.84	6550.08	0.934825	0.0259273	0.0254273	0.671469	0.0557569	0.106322	0.166452	26	450	3000	21.7214	0.0259273	0.0254273	0.723932	0.0589969	0.0497996	0.167271
27	546.43	6557.15	0.967573	0.0269273	0.0264273	0.674042	0.0562706	0.103649	0.166038	27	450	3000	21.7214	0.0269273	0.0264273	0.724918	0.0594788	0.0488876	0.166716
28	547.035	6564.41	1.00118	0.0279273	0.0274273	0.676674	0.0568036	0.100915	0.165608	28	450	3000	21.7214	0.0279273	0.0274273	0.72587	0.0599642	0.0479618	0.166204
29	547.655	6571.86	1.03563	0.0289273	0.0284273	0.67936	0.0573559	0.0981228	0.165161	29	450	3000	21.7214	0.0289273	0.0284273	0.726787	0.060453	0.047024	0.165736
30	548.289	6579.47	1.07089	0.0299274	0.0294274	0.682097	0.0579278	0.0952767	0.164699	30	450	3000	21.7214	0.0299274	0.0294274	0.727669	0.0609449	0.0460758	0.16531
31	548.938	6587.25	1.10692	0.0309274	0.0304274	0.68488	0.058519	0.0923805	0.16422	31	450	3000	21.7214	0.0309274	0.0304274	0.728514	0.0614401	0.0451191	0.164927
32	549.599	6595.19	1.14368	0.0319274	0.0314274	0.687706	0.0591296	0.089439	0.163726	32	450	3000	21.7214	0.0319274	0.0314274	0.729324	0.0619385	0.0441555	0.164582
33	550.243	6604.86	1.17943	0.0329275	0.0324275	0.690432	0.0597193	0.0864466	0.163403	33	450	3000	21.7214	0.0329275	0.0324275	0.730097	0.0624401	0.0431866	0.164276
34	550.852	6617.04	1.21327	0.0339275	0.0334275	0.692985	0.0602662	0.0834052	0.163344	34	450	3000	21.7214	0.0339275	0.0334275	0.730835	0.0629451	0.0422141	0.164006
35	551.471	6629.41	1.24762	0.0349275	0.0344275	0.695559	0.060828	0.0803379	0.163275	35	450	3000	21.7214	0.0349275	0.0344275	0.731538	0.0634533	0.0412394	0.163769
36	552.097	6641.94	1.28244	0.0359275	0.0354275	0.698149	0.0614046	0.0772506	0.163196	36	450	3000	21.7214	0.0359275	0.0354275	0.732207	0.0639647	0.0402639	0.163564
37	552.731	6654.62	1.31765	0.0369275	0.0364275	0.700748	0.0619954	0.0741504	0.163106	37	450	3000	21.7214	0.0369275	0.0364275	0.732841	0.0644792	0.0392891	0.163391
38	553.371	6667.43	1.35322	0.0379274	0.0374275	0.70335	0.0626	0.0710444	0.163006	38	450	3000	21.7214	0.0379274	0.0374275	0.733441	0.0649965	0.0383162	0.163246
39	554.017	6680.34	1.38907	0.0389275	0.0384275	0.705948	0.0632178	0.0679395	0.162895	39	450	3000	21.7214	0.0389275	0.0384275	0.734007	0.0655162	0.0373463	0.163131
40	554.667	6693.33	1.42516	0.0399275	0.0394275	0.708534	0.0638483	0.0648435	0.162774	40	450	3000	21.7214	0.0399275	0.0394275	0.734538	0.0660379	0.0363807	0.163043
41	555.319	6706.38	1.46141	0.0409274	0.0404274	0.711103	0.0644906	0.0617641	0.162642	41	450	3000	21.7214	0.0409274	0.0404274	0.735035	0.0665611	0.0354204	0.162984
42	555.974	6719.47	1.49777	0.0419274	0.0414274	0.713646	0.0651443	0.0587088	0.1625	42	450	3000	21.7214	0.0419274	0.0414274	0.735496	0.0670851	0.0344665	0.162952
43	556.629	6732.58	1.53418	0.0429275	0.0424275	0.716157	0.0658086	0.0556854	0.162349	43	450	3000	21.7214	0.0429275	0.0424275	0.735922	0.0676095	0.0335197	0.162949
44	557.284	6745.68	1.57057	0.0439275	0.0434275	0.718628	0.0664827	0.0527018	0.162187	44	450	3000	21.7214	0.0439275	0.0434275	0.736312	0.0681337	0.032581	0.162974
45	557.938	6758.76	1.60688	0.0449276	0.0444275	0.721052	0.0671658	0.0497655	0.162016	45	450	3000	21.7214	0.0449276	0.0444275	0.736666	0.0686574	0.0316512	0.163026
46	558.589	6771.78	1.64305	0.0459275	0.0454275	0.723422	0.0678572	0.0468841	0.161837	46	450	3000	21.7214	0.0459275	0.0454275	0.736984	0.0691802	0.030731	0.163105
47	559.237	6784.73	1.67903	0.0469274	0.0464275	0.725731	0.0685562	0.0440648	0.161648	47	450	3000	21.7214	0.0469274	0.0464275	0.737266	0.069702	0.0298213	0.16321
48	559.88	6797.6	1.71477	0.0479275	0.0474275	0.727972	0.069262	0.0413139	0.161452	48	450	3000	21.7214	0.0479275	0.0474275	0.737515	0.0702231	0.0289224	0.163339
49	560.419	6815.35	1.74469	0.0489275	0.0484275	0.729724	0.0698242	0.0386235	0.161828	49	450	3000	21.7214	0.0489275	0.0484275	0.737731	0.0707437	0.0280351	0.16349
50	560.929	6834.05	1.77302	0.0499275	0.0494275	0.731306	0.0703556	0.0360136	0.162325	50	450	3000	21.7214	0.0499275	0.0494275	0.737916	0.0712647	0.0271598	0.163659
51	561.432	6852.51	1.80099	0.0509274	0.0504274	0.732809	0.0708898	0.0334943	0.162807	51	450	3000	21.7214	0.0509274	0.0504274	0.738074	0.0717868	0.0262972	0.163842
52	561.929	6870.72	1.82859	0.0519274	0.0514274	0.73423	0.0714269	0.0310696	0.163274	52	450	3000	21.7214	0.0519274	0.0514274	0.738206	0.0723115	0.0254474	0.164035
53	562.418	6888.67	1.85578	0.0529274	0.0524274	0.735564	0.0719666	0.0287435	0.163726	53	450	3000	21.7214	0.0529274	0.0524274	0.738317	0.0728403	0.0246111	0.164231
54	562.9	6906.35	1.88257	0.0539274	0.0534274	0.736809	0.0725087	0.0265191	0.164163	54	450	3000	21.7214	0.0539274	0.0534274	0.738411	0.0733749	0.0237885	0.164426
55	563.375	6923.75	1.90894	0.0549273	0.0544273	0.737963	0.0730534	0.0243988	0.164585	55	450	3000	21.7214	0.0549273	0.0544273	0.73849	0.0739173	0.0229799	0.164613
56	563.842	6940.89	1.9349	0.0559274	0.0554274	0.739022	0.0736007	0.0223842	0.164993	56	450	3000	21.7214	0.0559274	0.0554274	0.738561	0.0744698	0.0221855	0.164784
57	564.302	6957.75	1.96045	0.0569275	0.0564274	0.739987	0.0741507	0.0204765	0.165386	57	450	3000	21.7214	0.0569275	0.0564274	0.738626	0.0750347	0.0214056	0.164934
58	564.755	6974.34	1.98559	0.0579274	0.0574274	0.740855	0.0747037	0.0186765	0.165765	58	450	3000	21.7214	0.0579274	0.0574274	0.73869	0.0756142	0.0206403	0.165056
59	565.2	6990.68	2.01035	0.0589273	0.0584274	0.741626	0.07526	0.0169836	0.166131	59	450	3000	21.7214	0.0589273	0.0584274	0.738756	0.0762108	0.0198898	0.165143
60	565.639	7006.77	2.03473	0.0599274	0.0594273	0.7423	0.07582	0.015397	0.166483	60	450	3000	21.7214	0.0599274	0.0594273	0.738828	0.0768268	0.0191541	0.165191
61	566.072	7022.64	2.05878	0.0609273	0.0604273	0.742877	0.0763843	0.0139151	0.166824	61	450	3000	21.7214	0.0609273	0.0604273	0.738908	0.0774647	0.0184333	0.165194
62	566.499	7038.3	2.0825	0.0619272	0.0614273	0.743358	0.0769535	0.0125361	0.167152	62	450	3000	21.7214	0.0619272	0.0614273	0.738999	0.0781263	0.0177273	0.165147
63	566.921	7053.78	2.10596	0.0629273	0.0624273	0.743745	0.0775284	0.0112573	0.167469	63	450	3000	21.7214	0.0629273	0.0624273	0.739102	0.0788139	0.017036	0.165048
64	567.339	7069.09	2.12916	0.0639272	0.0634273	0.744038	0.0781095	0.0100757	0.167777	64	450	3000	21.7214	0.0639272	0.0634273	0.739216	0.0795291	0.0163594	0.164895
65	567.528	7076.02	2.13966	0.0641995	0.0640634	0.744155	0.078375	0.00955601	0.167914	65	450	3000	21.7214	0.0641995	0.0640634	0.739296	0.0799992	0.0159366	0.164769
66	568.281	7103.65	2.18151	0.0651995	0.0646995	0.744842	0.0790533	0.00868453	0.16742	66	450	3000	21.7214	0.0651995	0.0646995	0.739379	0.0804814	0.0155197	0.16462
67	569.178	7136.53	2.23133	0.0661996	0.0656996	0.745578	0.0798816	0.00769733	0.166844	67	450	3000	21.7214	0.0661996	0.0656996	0.739519	0.0812645	0.014876	0.16434
68	570.077	7169.48	2.28126	0.0671995	0.0666996	0.746226	0.080725	0.00680012	0.166249	68	450	3000	21.7214	0.0671995	0.0666996	0.739667	0.0820794	0.0142466	0.164007
69	570.979	7202.56	2.33138	0.0681995	0.0676995	0.746789	0.0815853	0.0059881	0.165637	69	450	3000	21.7214	0.0681995	0.0676995	0.73982	0.0829266	0.0136311	0.163622
70	571.887	7235.84	2.38181	0.0691995	0.0686995	0.747273	0.0824644	0.00525562	0.165007	70	450	3000	21.7214	0.0691995	0.0686995	0.739975	0.0838069	0.0130294	0.163189
71	572.802	7269.39	2.43265	0.0701995	0.0696995	0.747681	0.0833643	0.00459707	0.164357	71	450	3000	21.7214	0.0701995	0.0696995	0.740126	0.0847203	0.0124412	0.162712
72	573.726	7303.27	2.48398	0.0711995	0.0706995	0.748017	0.0842871	0.00400706	0.163688	72	450	3000	21.7214	0.0711995	0.0706995	0.74027	0.0856668	0.0118662	0.162196
73	574.661	7337.56	2.53593	0.0721996	0.0716996	0.748285	0.085235	0.00348034	0.163	73	450	3000	21.7214	0.0721996	0.0716996	0.740402	0.0866464	0.0113042	0.161648
74	575.608	7372.3	2.58858	0.0731996	0.0726996	0.748487	0.0862101	0.00301181	0.162291	74	450	3000	21.7214	0.0731996	0.0726996	0.740515	0.0876585	0.0107549	0.161072
75	576.57	7407.58	2.64203	0.0741996	0.0736996	0.748627	0.0872147	0.00259648	0.161562	75	450	3000	21.7214	0.0741996	0.0736996	0.740604	0.0887023	0.0102181	0.160476
76	577.549	7443.46	2.69639	0.0751996	0.0746996	0.748708	0.0882513	0.00222969	0.160811	76	450	3000	21.7214	0.0751996	0.0746996	0.740663	0.089777	0.00969341	0.159867
77	578.545	7480	2.75175	0.0761997	0.0756996	0.748733	0.0893224	0.00190684	0.160038	77	450	3000	21.7214	0.0761997	0.0756996	0.740686	0.0908812	0.00918056	0.159252
78	579.562	7517.26	2.80821	0.0771997	0.0766997	0.748702	0.0904305	0.00162376	0.159243	78	450	3000	21.7214	0.0771997	0.0766997	0.740669	0.0920134	0.00867929	0.158639
79	580.599	7555.31	2.86586	0.0781996	0.0776997	0.74862	0.0915783	0.00137641	0.158426	79	450	3000	21.7214	0.0781996	0.0776997	0.740604	0.0931718	0.00818932	0.158034
80	581.66	7594.21	2.92481	0.0791996	0.0786996	0.748486	0.0927686	0.00116103	0.157585	80	450	3000	21.7214	0.0791996	0.0786996	0.740489	0.0943544	0.00771036	0.157446
81	582.746	7634.03	2.98514	0.0801996	0.0796996	0.748302	0.0940043	0.000974124	0.156719	81	450	3000	21.7214	0.0801996	0.0796996	0.740319	0.0955588	0.00724212	0.15688
82	583.859	7674.82	3.04695	0.0811996	0.0806996	0.748069	0.0952885	0.000812485	0.15583	82	450	3000	21.7214	0.0811996	0.0806996	0.74009	0.0967826	0.00678434	0.156343
83	585	7716.65	3.11033	0.0821995	0.0816996	0.747787	0.0966244	0.000673144	0.154915	83	450	3000	21.7214	0.0821995	0.0816996	0.7398	0.098023	0.00633676	0.15584
84	586.171	7759.59	3.17539	0.0831996	0.0826996	0.747457	0.0980153	0.000553375	0.153975	84	450	3000	21.7214	0.0831996	0.0826996	0.739449	0.0992773	0.00589909	0.155375
85	587.373	7803.69	3.24221	0.0841995	0.0836996	0.747077	0.0994648	0.000450727	0.153008	85	450	3000	21.7214	0.0841995	0.0836996	0.739035	0.100543	0.0054711	0.154951
86	588.609	7849.01	3.31088	0.0851995	0.0846995	0.746646	0.100976	0.000362962	0.152014	86	450	3000	21.7214	0.0851995	0.0846995	0.738561	0.101816	0.00505256	0.15457
87	589.881	7895.63	3.38151	0.0861995	0.0856995	0.746165	0.102554	0.000288064	0.150993	87	450	3000	21.7214	0.0861995	0.0856995	0.73803	0.103095	0.0046432	0.154232
88	590.936	7956.16	3.44014	0.0871995	0.0866995	0.74476	0.103705	0.00022177	0.151313	88	450	3000	21.7214	0.0871995	0.0866995	0.737444	0.104377	0.0042428	0.153937
89	591.998	8019.86	3.49913	0.0881995	0.0876995	0.743196	0.104856	0.000172908	0.151776	89	450	3000	21.7214	0.0881995	0.0876995	0.736809	0.105658	0.00385112	0.153682
90	593.095	8085.69	3.56008	0.0891996	0.0886995	0.741565	0.106059	0.000129118	0.152247	90	450	3000	21.7214	0.0891996	0.0886995	0.73613	0.106937	0.00346792	0.153464
91	594.229	8153.72	3.62308	0.0901995	0.0896996	0.739863	0.107318	9.21052e-05	0.152727	91	450	3000	21.7214	0.0901995	0.0896996	0.735414	0.108212	0.003093	0.153281
92	595.427	8222.76	3.68964	0.0911995	0.0906995	0.738178	0.108689	6.06855e-05	0.153073	92	450	3000	21.7214	0.0911995	0.0906995	0.734667	0.109479	0.00272616	0.153127
93	596.718	8291.63	3.76138	0.0921996	0.0916995	0.736594	0.110233	3.36192e-05	0.15314	93	450	3000	21.7214	0.0921996	0.0916995	0.733897	0.110738	0.00236713	0.152998
94	598.054	8362.88	3.8356	0.0931997	0.0926996	0.734938	0.111852	9.50902e-06	0.1532	94	450	3000	21.7214	0.0931997	0.0926996	0.733108	0.111986	0.00201568	0.152891
95	599.127	8420.12	3.89521	0.0941998	0.0936997	0.73366	0.113147	8.02254e-06	0.153185	95	450	3000	21.7214	0.0941998	0.0936997	0.732308	0.113221	0.00167164	0.1528
96	600.233	8479.1	3.95666	0.0951998	0.0946998	0.732332	0.114497	6.78113e-06	0.153164	96	450	3000	21.7214	0.0951998	0.0946998	0.731503	0.114441	0.00133479	0.152722
97	601.373	8539.89	4.01998	0.0961997	0.0956998	0.730952	0.115905	5.68861e-06	0.153137	97	450	3000	21.7214	0.0961997	0.0956998	0.730697	0.115645	0.00100495	0.152653
98	602.548	8602.57	4.08526	0.0971997	0.0966997	0.729517	0.117376	4.74218e-06	0.153103	98	450	3000	21.7214	0.0971997	0.0966997	0.729895	0.116831	0.000681896	0.152592
99	603.76	8667.19	4.15258	0.0981998	0.0976997	0.728023	0.118911	3.96723e-06	0.153062	99	450	3000	21.7214	0.0981998	0.0976997	0.729101	0.117998	0.000365393	0.152535
100	603.969	8678.36	4.16421	0.0983693	0.0982845	0.727764	0.119178	3.84522e-06	0.153054	100	450	3000	21.7214	0.0983693	0.0982845	0.728643	0.118671	0.000183262	0.152503
101	604.274	8694.63	4.18115	0.0993692	0.0988692	0.728189	0.119336	3.31207e-06	0.152472	101	450	3000	21.7214	0.0993692	0.0988692	0.728189	0.119336	3.31207e-06	0.152472
Baynidir Path 3_5: Primary										Baynidir Path 3_5: Diffused
Shell	temperature (｡C)	pressure (bar)	tot.time (my)	radius (cm)	X(node) (cm)	Xfe	Xmg	Xmn	Xca	Shell	temperature (｡C)	pressure (bar)	tot.time (my)	radius (cm)	X(node) (cm)	Xfe	Xmg	Xmn	Xca
1	561.929	6870.72	1.82859	0.00100003	0.000500017	0.73423	0.0714269	0.0310696	0.163274	1	450	3000	21.7214	0.00100003	0.000500017	0.754635	0.0791054	0.000224231	0.166035
2	562.418	6888.67	1.85578	0.00200004	0.00150004	0.735564	0.0719666	0.0287435	0.163726	2	450	3000	21.7214	0.00200004	0.00150004	0.754618	0.0791288	0.000224075	0.166029
3	562.9	6906.35	1.88257	0.00299996	0.0025	0.736809	0.0725087	0.0265191	0.164163	3	450	3000	21.7214	0.00299996	0.0025	0.754547	0.0792303	0.0002234	0.165999
4	563.375	6923.75	1.90894	0.00399993	0.00349995	0.737963	0.0730534	0.0243988	0.164585	4	450	3000	21.7214	0.00399993	0.00349995	0.75444	0.0793863	0.000222364	0.165952
5	563.842	6940.89	1.9349	0.005	0.00449996	0.739022	0.0736007	0.0223842	0.164993	5	450	3000	21.7214	0.005	0.00449996	0.754301	0.0795919	0.000221001	0.165886
6	564.302	6957.75	1.96045	0.00600009	0.00550005	0.739987	0.0741507	0.0204765	0.165386	6	450	3000	21.7214	0.00600009	0.00550005	0.754136	0.0798455	0.000219325	0.165799
7	564.755	6974.34	1.98559	0.00699999	0.00650004	0.740855	0.0747037	0.0186765	0.165765	7	450	3000	21.7214	0.00699999	0.00650004	0.753947	0.0801461	0.000217346	0.165689
8	565.2	6990.68	2.01035	0.00799993	0.00749996	0.741626	0.07526	0.0169836	0.166131	8	450	3000	21.7214	0.00799993	0.00749996	0.753738	0.080493	0.000215071	0.165554
9	565.639	7006.77	2.03473	0.00899995	0.00849994	0.7423	0.07582	0.015397	0.166483	9	450	3000	21.7214	0.00899995	0.00849994	0.753513	0.0808857	0.000212509	0.165389
10	566.072	7022.64	2.05878	0.00999989	0.00949992	0.742877	0.0763843	0.0139151	0.166824	10	450	3000	21.7214	0.00999989	0.00949992	0.753273	0.0813238	0.000209666	0.165193
11	566.499	7038.3	2.0825	0.0109998	0.0104999	0.743358	0.0769535	0.0125361	0.167152	11	450	3000	21.7214	0.0109998	0.0104999	0.753023	0.0818066	0.000206551	0.164964
12	566.921	7053.78	2.10596	0.0119999	0.0114999	0.743745	0.0775284	0.0112573	0.167469	12	450	3000	21.7214	0.0119999	0.0114999	0.752764	0.0823337	0.000203171	0.164699
13	567.339	7069.09	2.12916	0.0129998	0.0124999	0.744038	0.0781095	0.0100757	0.167777	13	450	3000	21.7214	0.0129998	0.0124999	0.752498	0.0829045	0.000199537	0.164398
14	567.528	7076.02	2.13966	0.0132721	0.013136	0.744155	0.078375	0.00955601	0.167914	14	450	3000	21.7214	0.0132721	0.013136	0.752325	0.08329	0.000197097	0.164188
15	568.281	7103.65	2.18151	0.0142721	0.0137721	0.744842	0.0790533	0.00868453	0.16742	15	450	3000	21.7214	0.0142721	0.0137721	0.752151	0.0836918	0.000194566	0.163963
16	569.178	7136.53	2.23133	0.0152722	0.0147722	0.745578	0.0798816	0.00769733	0.166844	16	450	3000	21.7214	0.0152722	0.0147722	0.751873	0.0843581	0.000190396	0.163579
17	570.077	7169.48	2.28126	0.0162721	0.0157722	0.746226	0.080725	0.00680012	0.166249	17	450	3000	21.7214	0.0162721	0.0157722	0.751588	0.0850661	0.000186002	0.16316
18	570.979	7202.56	2.33138	0.0172721	0.0167721	0.746789	0.0815853	0.0059881	0.165637	18	450	3000	21.7214	0.0172721	0.0167721	0.751296	0.085815	0.000181395	0.162708
19	571.887	7235.84	2.38181	0.0182721	0.0177721	0.747273	0.0824644	0.00525562	0.165007	19	450	3000	21.7214	0.0182721	0.0177721	0.750995	0.0866039	0.000176587	0.162224
20	572.802	7269.39	2.43265	0.0192721	0.0187721	0.747681	0.0833643	0.00459707	0.164357	20	450	3000	21.7214	0.0192721	0.0187721	0.750683	0.087432	0.000171588	0.161713
21	573.726	7303.27	2.48398	0.0202721	0.0197721	0.748017	0.0842871	0.00400706	0.163688	21	450	3000	21.7214	0.0202721	0.0197721	0.750356	0.0882982	0.000166412	0.161179
22	574.661	7337.56	2.53593	0.0212722	0.0207722	0.748285	0.085235	0.00348034	0.163	22	450	3000	21.7214	0.0212722	0.0207722	0.750012	0.0892016	0.00016107	0.160625
23	575.608	7372.3	2.58858	0.0222722	0.0217722	0.748487	0.0862101	0.00301181	0.162291	23	450	3000	21.7214	0.0222722	0.0217722	0.749646	0.0901407	0.000155575	0.160058
24	576.57	7407.58	2.64203	0.0232722	0.0227722	0.748627	0.0872147	0.00259648	0.161562	24	450	3000	21.7214	0.0232722	0.0227722	0.749254	0.0911142	0.00014994	0.159481
25	577.549	7443.46	2.69639	0.0242722	0.0237722	0.748708	0.0882513	0.00222969	0.160811	25	450	3000	21.7214	0.0242722	0.0237722	0.748833	0.0921204	0.000144178	0.158902
26	578.545	7480	2.75175	0.0252723	0.0247722	0.748733	0.0893224	0.00190684	0.160038	26	450	3000	21.7214	0.0252723	0.0247722	0.748378	0.0931576	0.000138304	0.158326
27	579.562	7517.26	2.80821	0.0262723	0.0257723	0.748702	0.0904305	0.00162376	0.159243	27	450	3000	21.7214	0.0262723	0.0257723	0.747884	0.0942237	0.000132329	0.15776
28	580.599	7555.31	2.86586	0.0272722	0.0267723	0.74862	0.0915783	0.00137641	0.158426	28	450	3000	21.7214	0.0272722	0.0267723	0.747349	0.0953163	0.00012627	0.157208
29	581.66	7594.21	2.92481	0.0282722	0.0277722	0.748486	0.0927686	0.00116103	0.157585	29	450	3000	21.7214	0.0282722	0.0277722	0.746768	0.0964331	0.000120139	0.156678
30	582.746	7634.03	2.98514	0.0292722	0.0287722	0.748302	0.0940043	0.000974124	0.156719	30	450	3000	21.7214	0.0292722	0.0287722	0.74614	0.0975713	0.000113951	0.156175
31	583.859	7674.82	3.04695	0.0302722	0.0297722	0.748069	0.0952885	0.000812485	0.15583	31	450	3000	21.7214	0.0302722	0.0297722	0.745462	0.098728	0.000107721	0.155702
32	585	7716.65	3.11033	0.0312721	0.0307722	0.747787	0.0966244	0.000673144	0.154915	32	450	3000	21.7214	0.0312721	0.0307722	0.744734	0.0999002	0.000101462	0.155265
33	586.171	7759.59	3.17539	0.0322722	0.0317722	0.747457	0.0980153	0.000553375	0.153975	33	450	3000	21.7214	0.0322722	0.0317722	0.743955	0.101085	9.51898e-05	0.154865
34	587.373	7803.69	3.24221	0.0332721	0.0327722	0.747077	0.0994648	0.000450727	0.153008	34	450	3000	21.7214	0.0332721	0.0327722	0.743128	0.102279	8.89182e-05	0.154504
35	588.609	7849.01	3.31088	0.0342721	0.0337721	0.746646	0.100976	0.000362962	0.152014	35	450	3000	21.7214	0.0342721	0.0337721	0.742255	0.103479	8.26621e-05	0.154184
36	589.881	7895.63	3.38151	0.0352721	0.0347721	0.746165	0.102554	0.000288064	0.150993	36	450	3000	21.7214	0.0352721	0.0347721	0.741339	0.104681	7.64355e-05	0.153904
37	590.936	7956.16	3.44014	0.0362721	0.0357721	0.74476	0.103705	0.00022177	0.151313	37	450	3000	21.7214	0.0362721	0.0357721	0.740385	0.105884	7.02525e-05	0.153661
38	591.998	8019.86	3.49913	0.0372721	0.0367721	0.743196	0.104856	0.000172908	0.151776	38	450	3000	21.7214	0.0372721	0.0367721	0.7394	0.107083	6.41269e-05	0.153453
39	593.095	8085.69	3.56008	0.0382722	0.0377721	0.741565	0.106059	0.000129118	0.152247	39	450	3000	21.7214	0.0382722	0.0377721	0.738389	0.108275	5.80719e-05	0.153278
40	594.229	8153.72	3.62308	0.0392721	0.0387722	0.739863	0.107318	9.21052e-05	0.152727	40	450	3000	21.7214	0.0392721	0.0387722	0.737359	0.109458	5.21013e-05	0.15313
41	595.427	8222.76	3.68964	0.0402721	0.0397721	0.738178	0.108689	6.06855e-05	0.153073	41	450	3000	21.7214	0.0402721	0.0397721	0.736318	0.110628	4.62278e-05	0.153007
42	596.718	8291.63	3.76138	0.0412722	0.0407721	0.736594	0.110233	3.36192e-05	0.15314	42	450	3000	21.7214	0.0412722	0.0407721	0.735273	0.111782	4.04633e-05	0.152905
43	598.054	8362.88	3.8356	0.0422723	0.0417722	0.734938	0.111852	9.50902e-06	0.1532	43	450	3000	21.7214	0.0422723	0.0417722	0.734229	0.112918	3.48192e-05	0.152818
44	599.127	8420.12	3.89521	0.0432724	0.0427723	0.73366	0.113147	8.02254e-06	0.153185	44	450	3000	21.7214	0.0432724	0.0427723	0.733194	0.114033	2.93074e-05	0.152744
45	600.233	8479.1	3.95666	0.0442724	0.0437724	0.732332	0.114497	6.78113e-06	0.153164	45	450	3000	21.7214	0.0442724	0.0437724	0.732174	0.115122	2.39386e-05	0.15268
46	601.373	8539.89	4.01998	0.0452723	0.0447724	0.730952	0.115905	5.68861e-06	0.153137	46	450	3000	21.7214	0.0452723	0.0447724	0.731174	0.116184	1.87235e-05	0.152623
47	602.548	8602.57	4.08526	0.0462723	0.0457723	0.729517	0.117376	4.74218e-06	0.153103	47	450	3000	21.7214	0.0462723	0.0457723	0.730199	0.117216	1.36711e-05	0.152572
48	603.76	8667.19	4.15258	0.0472724	0.0467723	0.728023	0.118911	3.96723e-06	0.153062	48	450	3000	21.7214	0.0472724	0.0467723	0.729253	0.118214	8.79001e-06	0.152524
49	603.969	8678.36	4.16421	0.0474419	0.0473571	0.727764	0.119178	3.84522e-06	0.153054	49	450	3000	21.7214	0.0474419	0.0473571	0.728715	0.118782	6.01899e-06	0.152498
50	604.274	8694.63	4.18115	0.0484418	0.0479418	0.728189	0.119336	3.31207e-06	0.152472	50	450	3000	21.7214	0.0484418	0.0479418	0.728189	0.119336	3.31207e-06	0.152472
Baynidir Path 3_6: Primary										Baynidir Path 3_6: Diffused
Shell	temperature (｡C	) pressure (bar)	tot.time (my)	radius (cm)	X(node) (cm)	Xfe	Xmg	Xmn	Xca	hell	temperature (｡C	) pressure (bar)	tot.time (my)	radius (cm)	X(node) (cm)	Xfe	Xmg	Xmn	Xca
1	579.562	7517.26	2.80821	0.000999992	0.000499996	0.748702	0.0904305	0.00162376	0.159243	1	450	3000	21.7214	0.000999992	0.000499996	0.741029	0.106024	3.34007e-06	0.152943
2	580.599	7555.31	2.86586	0.00199998	0.00149999	0.74862	0.0915783	0.00137641	0.158426	2	450	3000	21.7214	0.00199998	0.00149999	0.740989	0.106067	3.33999e-06	0.152941
3	581.66	7594.21	2.92481	0.00299997	0.00249997	0.748486	0.0927686	0.00116103	0.157585	3	450	3000	21.7214	0.00299997	0.00249997	0.740816	0.10625	3.33961e-06	0.152931
4	582.746	7634.03	2.98514	0.00399996	0.00349996	0.748302	0.0940043	0.000974124	0.156719	4	450	3000	21.7214	0.00399996	0.00349996	0.740551	0.106529	3.33903e-06	0.152916
5	583.859	7674.82	3.04695	0.00499993	0.00449994	0.748069	0.0952885	0.000812485	0.15583	5	450	3000	21.7214	0.00499993	0.00449994	0.740207	0.106892	3.33828e-06	0.152898
6	585	7716.65	3.11033	0.00599988	0.0054999	0.747787	0.0966244	0.000673144	0.154915	6	450	3000	21.7214	0.00599988	0.0054999	0.73979	0.10733	3.33737e-06	0.152877
7	586.171	7759.59	3.17539	0.00699991	0.00649989	0.747457	0.0980153	0.000553375	0.153975	7	450	3000	21.7214	0.00699991	0.00649989	0.739305	0.107837	3.33631e-06	0.152855
8	587.373	7803.69	3.24221	0.00799988	0.00749989	0.747077	0.0994648	0.000450727	0.153008	8	450	3000	21.7214	0.00799988	0.00749989	0.738758	0.108406	3.33512e-06	0.152833
9	588.609	7849.01	3.31088	0.00899986	0.00849987	0.746646	0.100976	0.000362962	0.152014	9	450	3000	21.7214	0.00899986	0.00849987	0.738157	0.109029	3.3338e-06	0.15281
10	589.881	7895.63	3.38151	0.00999983	0.00949985	0.746165	0.102554	0.000288064	0.150993	10	450	3000	21.7214	0.00999983	0.00949985	0.737508	0.1097	3.33239e-06	0.152788
11	590.936	7956.16	3.44014	0.0109998	0.0104998	0.74476	0.103705	0.00022177	0.151313	11	450	3000	21.7214	0.0109998	0.0104998	0.736819	0.110411	3.33088e-06	0.152766
12	591.998	8019.86	3.49913	0.0119998	0.0114998	0.743196	0.104856	0.000172908	0.151776	12	450	3000	21.7214	0.0119998	0.0114998	0.736098	0.111154	3.32931e-06	0.152745
13	593.095	8085.69	3.56008	0.0129999	0.0124999	0.741565	0.106059	0.000129118	0.152247	13	450	3000	21.7214	0.0129999	0.0124999	0.735353	0.11192	3.32769e-06	0.152724
14	594.229	8153.72	3.62308	0.0139999	0.0134999	0.739863	0.107318	9.21052e-05	0.152727	14	450	3000	21.7214	0.0139999	0.0134999	0.734592	0.112702	3.32603e-06	0.152703
15	595.427	8222.76	3.68964	0.0149998	0.0144998	0.738178	0.108689	6.06855e-05	0.153073	15	450	3000	21.7214	0.0149998	0.0144998	0.733824	0.113493	3.32435e-06	0.15268
16	596.718	8291.63	3.76138	0.0159999	0.0154999	0.736594	0.110233	3.36192e-05	0.15314	16	450	3000	21.7214	0.0159999	0.0154999	0.733056	0.114283	3.32268e-06	0.152657
17	598.054	8362.88	3.8356	0.017	0.0164999	0.734938	0.111852	9.50902e-06	0.1532	17	450	3000	21.7214	0.017	0.0164999	0.732297	0.115067	3.32102e-06	0.152633
18	599.127	8420.12	3.89521	0.0180001	0.0175	0.73366	0.113147	8.02254e-06	0.153185	18	450	3000	21.7214	0.0180001	0.0175	0.731553	0.115836	3.3194e-06	0.152608
19	600.233	8479.1	3.95666	0.0190001	0.0185001	0.732332	0.114497	6.78113e-06	0.153164	19	450	3000	21.7214	0.0190001	0.0185001	0.730831	0.116584	3.31783e-06	0.152582
20	601.373	8539.89	4.01998	0.0200001	0.0195001	0.730952	0.115905	5.68861e-06	0.153137	20	450	3000	21.7214	0.0200001	0.0195001	0.730138	0.117304	3.31632e-06	0.152555
21	602.548	8602.57	4.08526	0.021	0.0205	0.729517	0.117376	4.74218e-06	0.153103	21	450	3000	21.7214	0.021	0.0205	0.729479	0.11799	3.31489e-06	0.152528
22	603.76	8667.19	4.15258	0.0220001	0.0215001	0.728023	0.118911	3.96723e-06	0.153062	22	450	3000	21.7214	0.0220001	0.0215001	0.728859	0.118637	3.31353e-06	0.152501
23	603.969	8678.36	4.16421	0.0221696	0.0220849	0.727764	0.119178	3.84522e-06	0.153054	23	450	3000	21.7214	0.0221696	0.0220849	0.728516	0.118994	3.31279e-06	0.152486
24	604.274	8694.63	4.18115	0.0231695	0.0226696	0.728189	0.119336	3.31207e-06	0.152472	24	450	3000	21.7214	0.0231695	0.0226696	0.728189	0.119336	3.31207e-06	0.152472

## Sheet: Bozdag Path3
Bozdag Path 3_1: Primary										Bozdag Path 3_1: Diffused
Shell	temperature (｡C)	pressure (bar)	tot.time (my)	radius (cm)	X(node) (cm)	Xfe	Xmg	Xmn	Xca	Shell	temperature (｡C)	pressure (bar)	tot.time (my)	radius (cm)	X(node) (cm)	Xfe	Xmg	Xmn	Xca
1	555.312	7159.37	0	0.00680353	0.00340177	0.721723	0.0651732	0.0335425	0.179562	1	450	3000	20.2602	0.00680353	0.00340177	0.722665	0.0652198	0.0325519	0.179563
2	555.312	7159.37	2.2583e-06	0.00772739	0.00726546	0.721723	0.0651733	0.0335421	0.179562	2	450	3000	20.2602	0.00772739	0.00726546	0.722692	0.0652224	0.0325224	0.179564
3	555.312	7159.37	4.5166e-06	0.00822215	0.00797477	0.721723	0.0651734	0.0335418	0.179562	3	450	3000	20.2602	0.00822215	0.00797477	0.722698	0.0652231	0.0325149	0.179564
4	555.312	7159.38	6.7749e-06	0.00875496	0.00848856	0.721723	0.0651736	0.0335415	0.179562	4	450	3000	20.2602	0.00875496	0.00848856	0.722703	0.0652237	0.0325091	0.179564
5	555.313	7159.38	1.35498e-05	0.0102431	0.00949903	0.721723	0.065174	0.0335406	0.179562	5	450	3000	20.2602	0.0102431	0.00949903	0.722714	0.0652248	0.0324967	0.179564
6	555.313	7159.38	2.03247e-05	0.0111164	0.0106797	0.721724	0.0651744	0.0335396	0.179562	6	450	3000	20.2602	0.0111164	0.0106797	0.722729	0.0652264	0.0324804	0.179564
7	555.313	7159.39	2.70996e-05	0.0119593	0.0115378	0.721724	0.0651748	0.0335387	0.179562	7	450	3000	20.2602	0.0119593	0.0115378	0.72274	0.0652276	0.0324674	0.179565
8	555.313	7159.39	3.38745e-05	0.0126767	0.012318	0.721724	0.0651753	0.0335378	0.179563	8	450	3000	20.2602	0.0126767	0.012318	0.722751	0.0652289	0.0324547	0.179565
9	555.313	7159.4	4.5166e-05	0.0138577	0.0132672	0.721725	0.065176	0.0335362	0.179563	9	450	3000	20.2602	0.0138577	0.0132672	0.722766	0.0652305	0.0324382	0.179565
10	555.313	7159.4	5.64575e-05	0.0147005	0.0142791	0.721726	0.0651766	0.0335346	0.179563	10	450	3000	20.2602	0.0147005	0.0142791	0.722783	0.0652324	0.0324191	0.179566
11	555.314	7159.41	6.7749e-05	0.0155137	0.0151071	0.721726	0.0651773	0.0335331	0.179563	11	450	3000	20.2602	0.0155137	0.0151071	0.722797	0.0652342	0.0324025	0.179566
12	555.314	7159.42	8.35571e-05	0.0165943	0.016054	0.721727	0.0651783	0.0335309	0.179564	12	450	3000	20.2602	0.0165943	0.016054	0.722815	0.0652363	0.0323822	0.179567
13	555.314	7159.43	9.93652e-05	0.0174462	0.0170203	0.721728	0.0651793	0.0335287	0.179564	13	450	3000	20.2602	0.0174462	0.0170203	0.722834	0.0652386	0.0323601	0.179567
14	555.315	7159.44	0.00011969	0.0185445	0.0179953	0.721729	0.0651805	0.0335259	0.179565	14	450	3000	20.2602	0.0185445	0.0179953	0.722855	0.0652411	0.0323365	0.179568
15	555.315	7159.45	0.000140015	0.0194247	0.0189846	0.72173	0.0651818	0.0335231	0.179565	15	450	3000	20.2602	0.0194247	0.0189846	0.722877	0.0652439	0.032311	0.179568
16	555.315	7159.46	0.000164856	0.0205023	0.0199635	0.721731	0.0651833	0.0335196	0.179566	16	450	3000	20.2602	0.0205023	0.0199635	0.7229	0.0652469	0.0322843	0.179569
17	555.316	7159.48	0.000194214	0.0216044	0.0210533	0.721733	0.0651851	0.0335156	0.179566	17	450	3000	20.2602	0.0216044	0.0210533	0.722927	0.0652505	0.0322528	0.17957
18	555.316	7159.49	0.000223572	0.022563	0.0220837	0.721735	0.065187	0.0335115	0.179567	18	450	3000	20.2602	0.022563	0.0220837	0.722954	0.0652541	0.0322213	0.179571
19	555.317	7159.51	0.000257446	0.0236371	0.0231001	0.721736	0.0651891	0.0335069	0.179568	19	450	3000	20.2602	0.0236371	0.0231001	0.722982	0.065258	0.0321885	0.179572
20	555.318	7159.53	0.000291321	0.0245595	0.0240983	0.721738	0.0651911	0.0335022	0.179568	20	450	3000	20.2602	0.0245595	0.0240983	0.72301	0.0652621	0.0321546	0.179573
21	555.318	7159.55	0.000329712	0.0255906	0.025075	0.72174	0.0651935	0.0334969	0.179569	21	450	3000	20.2602	0.0255906	0.025075	0.72304	0.0652664	0.0321198	0.179574
22	555.319	7159.57	0.00037262	0.0266256	0.0261081	0.721743	0.0651962	0.0334909	0.17957	22	450	3000	20.2602	0.0266256	0.0261081	0.723072	0.0652712	0.0320812	0.179575
23	555.32	7159.6	0.000420044	0.0276823	0.0271539	0.721745	0.0651991	0.0334844	0.179571	23	450	3000	20.2602	0.0276823	0.0271539	0.723107	0.0652765	0.0320402	0.179577
24	555.321	7159.63	0.000471985	0.0287382	0.0282103	0.721748	0.0652023	0.0334772	0.179573	24	450	3000	20.2602	0.0287382	0.0282103	0.723143	0.0652821	0.0319968	0.179578
25	555.322	7159.66	0.000528442	0.0297897	0.029264	0.721751	0.0652058	0.0334694	0.179574	25	450	3000	20.2602	0.0297897	0.029264	0.723181	0.0652882	0.0319514	0.17958
26	555.323	7159.69	0.000589417	0.0308293	0.0303095	0.721754	0.0652096	0.033461	0.179575	26	450	3000	20.2602	0.0308293	0.0303095	0.72322	0.0652946	0.0319043	0.179581
27	555.324	7159.73	0.000654907	0.0318535	0.0313414	0.721758	0.0652136	0.033452	0.179577	27	450	3000	20.2602	0.0318535	0.0313414	0.723259	0.0653014	0.0318558	0.179583
28	555.325	7159.76	0.000724915	0.0328605	0.032357	0.721761	0.065218	0.0334423	0.179578	28	450	3000	20.2602	0.0328605	0.032357	0.7233	0.0653085	0.0318059	0.179585
29	555.327	7159.8	0.000799438	0.0338502	0.0333553	0.721765	0.0652225	0.033432	0.17958	29	450	3000	20.2602	0.0338502	0.0333553	0.723342	0.0653159	0.0317549	0.179587
30	555.328	7159.85	0.000878479	0.0348203	0.0343352	0.72177	0.0652274	0.0334211	0.179582	30	450	3000	20.2602	0.0348203	0.0343352	0.723384	0.0653237	0.0317029	0.17959
31	555.33	7159.89	0.000966553	0.0358389	0.0353296	0.721774	0.0652329	0.033409	0.179584	31	450	3000	20.2602	0.0358389	0.0353296	0.723428	0.065332	0.031648	0.179592
32	555.332	7159.95	0.00106366	0.0368691	0.036354	0.72178	0.0652389	0.0333956	0.179586	32	450	3000	20.2602	0.0368691	0.036354	0.723475	0.0653411	0.0315892	0.179594
33	555.333	7160	0.00116528	0.0378559	0.0373625	0.721785	0.0652452	0.0333816	0.179588	33	450	3000	20.2602	0.0378559	0.0373625	0.723523	0.0653506	0.0315291	0.179597
34	555.335	7160.06	0.00127594	0.0388733	0.0383646	0.721791	0.065252	0.0333663	0.179591	34	450	3000	20.2602	0.0388733	0.0383646	0.723572	0.0653606	0.0314671	0.1796
35	555.338	7160.13	0.00139563	0.0398902	0.0393818	0.721797	0.0652594	0.0333498	0.179594	35	450	3000	20.2602	0.0398902	0.0393818	0.723624	0.0653713	0.0314019	0.179603
36	555.34	7160.2	0.00152435	0.040911	0.0404006	0.721804	0.0652674	0.0333321	0.179596	36	450	3000	20.2602	0.040911	0.0404006	0.723677	0.0653826	0.0313341	0.179607
37	555.342	7160.27	0.00166211	0.0419293	0.0414201	0.721811	0.0652759	0.0333131	0.1796	37	450	3000	20.2602	0.0419293	0.0414201	0.723731	0.0653947	0.0312638	0.17961
38	555.345	7160.35	0.0018089	0.0429447	0.042437	0.721819	0.065285	0.0332929	0.179603	38	450	3000	20.2602	0.0429447	0.042437	0.723788	0.0654073	0.0311912	0.179614
39	555.348	7160.43	0.00196472	0.0439545	0.0434496	0.721827	0.0652947	0.0332715	0.179606	39	450	3000	20.2602	0.0439545	0.0434496	0.723845	0.0654206	0.0311164	0.179618
40	555.351	7160.52	0.00212958	0.0449572	0.0444558	0.721836	0.0653049	0.0332488	0.17961	40	450	3000	20.2602	0.0449572	0.0444558	0.723904	0.0654346	0.0310394	0.179622
41	555.354	7160.62	0.00230347	0.0459523	0.0454547	0.721845	0.0653157	0.033225	0.179614	41	450	3000	20.2602	0.0459523	0.0454547	0.723964	0.0654492	0.0309605	0.179626
42	555.357	7160.72	0.00248639	0.0469393	0.0464458	0.721855	0.0653271	0.0331998	0.179618	42	450	3000	20.2602	0.0469393	0.0464458	0.724025	0.0654644	0.0308795	0.179631
43	555.361	7160.82	0.00268286	0.0479472	0.0474432	0.721865	0.0653393	0.0331728	0.179623	43	450	3000	20.2602	0.0479472	0.0474432	0.724088	0.0654805	0.0307954	0.179636
44	555.364	7160.93	0.00288837	0.0489331	0.0484401	0.721876	0.065352	0.0331447	0.179627	44	450	3000	20.2602	0.0489331	0.0484401	0.724153	0.0654975	0.0307087	0.179641
45	555.368	7161.05	0.00310742	0.0499383	0.0494357	0.721887	0.0653656	0.0331146	0.179632	45	450	3000	20.2602	0.0499383	0.0494357	0.724219	0.0655153	0.0306193	0.179647
46	555.373	7161.18	0.00334003	0.0509452	0.0504417	0.7219	0.0653801	0.0330827	0.179638	46	450	3000	20.2602	0.0509452	0.0504417	0.724287	0.0655341	0.0305261	0.179652
47	555.377	7161.31	0.00358618	0.0519559	0.0514505	0.721912	0.0653954	0.033049	0.179643	47	450	3000	20.2602	0.0519559	0.0514505	0.724358	0.0655541	0.0304298	0.179659
48	555.382	7161.45	0.00384589	0.0529654	0.0524607	0.721926	0.0654116	0.0330134	0.179649	48	450	3000	20.2602	0.0529654	0.0524607	0.72443	0.065575	0.0303304	0.179665
49	555.387	7161.6	0.00411914	0.0539715	0.0534685	0.72194	0.0654286	0.0329761	0.179655	49	450	3000	20.2602	0.0539715	0.0534685	0.724503	0.0655969	0.0302282	0.179672
50	555.392	7161.75	0.00440594	0.0549713	0.0544714	0.721955	0.0654465	0.0329369	0.179662	50	450	3000	20.2602	0.0549713	0.0544714	0.724578	0.0656199	0.0301234	0.179679
51	555.397	7161.92	0.0047063	0.0559632	0.0554673	0.721971	0.0654652	0.0328958	0.179668	51	450	3000	20.2602	0.0559632	0.0554673	0.724654	0.0656437	0.0300163	0.179686
52	555.403	7162.09	0.00502472	0.0569641	0.0564637	0.721987	0.0654851	0.0328524	0.179675	52	450	3000	20.2602	0.0569641	0.0564637	0.724731	0.0656688	0.0299061	0.179694
53	555.409	7162.27	0.00536121	0.0579642	0.0574642	0.722004	0.0655061	0.0328065	0.179683	53	450	3000	20.2602	0.0579642	0.0574642	0.72481	0.0656951	0.0297923	0.179702
54	555.415	7162.46	0.00571576	0.0589633	0.0584638	0.722023	0.0655282	0.0327582	0.179691	54	450	3000	20.2602	0.0589633	0.0584638	0.724891	0.0657227	0.0296755	0.179711
55	555.422	7162.66	0.00608838	0.0599586	0.059461	0.722042	0.0655515	0.0327075	0.179699	55	450	3000	20.2602	0.0599586	0.059461	0.724973	0.0657516	0.0295556	0.17972
56	555.429	7162.88	0.00648358	0.0609637	0.0604612	0.722062	0.0655763	0.0326537	0.179708	56	450	3000	20.2602	0.0609637	0.0604612	0.725056	0.0657819	0.0294322	0.17973
57	555.437	7163.1	0.00690137	0.0619702	0.061467	0.722083	0.0656024	0.0325969	0.179717	57	450	3000	20.2602	0.0619702	0.061467	0.725142	0.0658137	0.0293047	0.17974
58	555.445	7163.34	0.00733722	0.0629642	0.0624672	0.722105	0.0656298	0.0325378	0.179727	58	450	3000	20.2602	0.0629642	0.0624672	0.725228	0.0658469	0.0291745	0.17975
59	555.453	7163.59	0.00779565	0.0639622	0.0634632	0.722129	0.0656585	0.0324757	0.179737	59	450	3000	20.2602	0.0639622	0.0634632	0.725316	0.0658815	0.0290415	0.179761
60	555.462	7163.85	0.00827667	0.0649568	0.0644595	0.722153	0.0656887	0.0324106	0.179748	60	450	3000	20.2602	0.0649568	0.0644595	0.725405	0.0659176	0.0289051	0.179773
61	555.471	7164.12	0.00878479	0.0659598	0.0654583	0.722178	0.0657207	0.0323418	0.179759	61	450	3000	20.2602	0.0659598	0.0654583	0.725495	0.0659555	0.0287649	0.179785
62	555.48	7164.41	0.00932001	0.0669645	0.0664621	0.722205	0.0657544	0.0322696	0.179771	62	450	3000	20.2602	0.0669645	0.0664621	0.725587	0.0659953	0.0286204	0.179797
63	555.49	7164.71	0.00987781	0.0679597	0.0674621	0.722233	0.0657895	0.0321944	0.179783	63	450	3000	20.2602	0.0679597	0.0674621	0.72568	0.0660366	0.028473	0.17981
64	555.501	7165.03	0.0104627	0.0689587	0.0684592	0.722262	0.0658264	0.0321156	0.179796	64	450	3000	20.2602	0.0689587	0.0684592	0.725774	0.0660797	0.0283224	0.179824
65	555.512	7165.36	0.0110747	0.0699551	0.0694569	0.722292	0.0658651	0.0320334	0.17981	65	450	3000	20.2602	0.0699551	0.0694569	0.725869	0.0661247	0.0281682	0.179838
66	555.524	7165.71	0.0117183	0.0709586	0.0704568	0.722323	0.0659058	0.031947	0.179824	66	450	3000	20.2602	0.0709586	0.0704568	0.725965	0.0661718	0.02801	0.179853
67	555.536	7166.07	0.012389	0.0719549	0.0714567	0.722356	0.0659483	0.0318572	0.179838	67	450	3000	20.2602	0.0719549	0.0714567	0.726062	0.0662209	0.0278482	0.179868
68	555.548	7166.45	0.0130914	0.0729561	0.0724555	0.72239	0.0659928	0.0317632	0.179854	68	450	3000	20.2602	0.0729561	0.0724555	0.726161	0.066272	0.0276829	0.179884
69	555.561	7166.84	0.0138253	0.0739563	0.0734562	0.722426	0.0660394	0.0316653	0.17987	69	450	3000	20.2602	0.0739563	0.0734562	0.72626	0.0663255	0.0275137	0.179901
70	555.575	7167.26	0.0145909	0.074956	0.0744562	0.722462	0.0660881	0.0315634	0.179886	70	450	3000	20.2602	0.074956	0.0744562	0.726359	0.0663811	0.0273408	0.179919
71	555.59	7167.69	0.0153881	0.0759538	0.0754549	0.7225	0.0661389	0.0314574	0.179903	71	450	3000	20.2602	0.0759538	0.0754549	0.72646	0.0664391	0.0271645	0.179937
72	555.605	7168.14	0.0162214	0.0769559	0.0764548	0.72254	0.0661921	0.0313469	0.179921	72	450	3000	20.2602	0.0769559	0.0764548	0.726561	0.0664995	0.0269843	0.179956
73	555.62	7168.61	0.0170908	0.077958	0.0774569	0.72258	0.0662477	0.0312318	0.17994	73	450	3000	20.2602	0.077958	0.0774569	0.726662	0.0665626	0.0268	0.179975
74	555.637	7169.1	0.0179964	0.0789589	0.0784584	0.722623	0.0663057	0.0311123	0.179959	74	450	3000	20.2602	0.0789589	0.0784584	0.726764	0.0666283	0.026612	0.179995
75	555.654	7169.61	0.0189381	0.079957	0.0794579	0.722666	0.0663662	0.0309883	0.17998	75	450	3000	20.2602	0.079957	0.0794579	0.726866	0.0666965	0.0264207	0.180016
76	555.671	7170.14	0.0199205	0.0809572	0.0804571	0.722711	0.0664294	0.0308593	0.18	76	450	3000	20.2602	0.0809572	0.0804571	0.726968	0.0667676	0.0262257	0.180038
77	555.69	7170.69	0.0209435	0.0819556	0.0814564	0.722757	0.0664953	0.0307253	0.180022	77	450	3000	20.2602	0.0819556	0.0814564	0.727071	0.0668415	0.026027	0.180061
78	555.709	7171.27	0.0220117	0.0829575	0.0824566	0.722805	0.0665643	0.0305858	0.180045	78	450	3000	20.2602	0.0829575	0.0824566	0.727173	0.0669186	0.0258245	0.180084
79	555.729	7171.87	0.023125	0.0839585	0.083458	0.722855	0.0666364	0.0304408	0.180068	79	450	3000	20.2602	0.0839585	0.083458	0.727275	0.0669988	0.025618	0.180109
80	555.75	7172.5	0.0242835	0.0849586	0.0844586	0.722906	0.0667115	0.0302904	0.180092	80	450	3000	20.2602	0.0849586	0.0844586	0.727376	0.0670822	0.025408	0.180134
81	555.772	7173.15	0.0254917	0.0859611	0.0854598	0.722958	0.0667901	0.0301341	0.180117	81	450	3000	20.2602	0.0859611	0.0854598	0.727477	0.067169	0.0251942	0.18016
82	555.794	7173.83	0.0267496	0.0869628	0.086462	0.723013	0.0668721	0.0299719	0.180143	82	450	3000	20.2602	0.0869628	0.086462	0.727577	0.0672594	0.0249766	0.180187
83	555.818	7174.54	0.0280571	0.0879634	0.0874631	0.723068	0.0669576	0.0298039	0.18017	83	450	3000	20.2602	0.0879634	0.0874631	0.727677	0.0673532	0.0247556	0.180214
84	555.842	7175.27	0.0294144	0.0889615	0.0884624	0.723125	0.0670466	0.0296302	0.180198	84	450	3000	20.2602	0.0889615	0.0884624	0.727775	0.0674505	0.0245315	0.180243
85	555.868	7176.03	0.0308258	0.0899607	0.0894611	0.723183	0.0671394	0.0294503	0.180227	85	450	3000	20.2602	0.0899607	0.0894611	0.727872	0.0675515	0.0243039	0.180272
86	555.894	7176.83	0.032296	0.0909624	0.0904615	0.723243	0.0672363	0.0292636	0.180257	86	450	3000	20.2602	0.0909624	0.0904615	0.727968	0.0676564	0.0240725	0.180303
87	555.922	7177.65	0.0338203	0.0919605	0.0914614	0.723305	0.0673371	0.0290709	0.180287	87	450	3000	20.2602	0.0919605	0.0914614	0.728063	0.0677652	0.0238378	0.180334
88	555.95	7178.51	0.0354034	0.0929598	0.0924601	0.723367	0.0674421	0.0288716	0.180319	88	450	3000	20.2602	0.0929598	0.0924601	0.728156	0.0678777	0.0236	0.180366
89	555.98	7179.4	0.0370497	0.0939611	0.0934605	0.723431	0.0675517	0.0286653	0.180352	89	450	3000	20.2602	0.0939611	0.0934605	0.728248	0.0679943	0.0233585	0.1804
90	556.011	7180.32	0.0387592	0.0949627	0.0944619	0.723496	0.0676659	0.0284522	0.180386	90	450	3000	20.2602	0.0949627	0.0944619	0.728338	0.068115	0.0231134	0.180434
91	556.043	7181.28	0.040532	0.0959637	0.0954632	0.723563	0.0677847	0.0282324	0.18042	91	450	3000	20.2602	0.0959637	0.0954632	0.728426	0.0682394	0.0228651	0.180469
92	556.076	7182.27	0.042368	0.0969635	0.0964636	0.72363	0.0679082	0.0280059	0.180456	92	450	3000	20.2602	0.0969635	0.0964636	0.728513	0.0683673	0.0226139	0.180505
93	556.11	7183.3	0.0442717	0.0979644	0.0974639	0.723698	0.0680368	0.0277723	0.180493	93	450	3000	20.2602	0.0979644	0.0974639	0.728599	0.0684986	0.0223597	0.180543
94	556.146	7184.37	0.0462432	0.0989645	0.0984644	0.723767	0.0681704	0.0275319	0.18053	94	450	3000	20.2602	0.0989645	0.0984644	0.728684	0.0686329	0.0221024	0.180581
95	556.182	7185.47	0.0482825	0.0999633	0.0994639	0.723837	0.0683092	0.0272846	0.180569	95	450	3000	20.2602	0.0999633	0.0994639	0.728768	0.0687698	0.0218424	0.18062
96	556.22	7186.61	0.0503952	0.100964	0.100464	0.723908	0.0684535	0.0270301	0.180609	96	450	3000	20.2602	0.100964	0.100464	0.728851	0.0689088	0.0215796	0.18066
97	556.26	7187.79	0.0525832	0.101965	0.101465	0.723979	0.0686037	0.0267683	0.180649	97	450	3000	20.2602	0.101965	0.101465	0.728935	0.0690495	0.0213138	0.180702
98	556.301	7189.02	0.0548454	0.102965	0.102465	0.72405	0.0687596	0.0264994	0.180691	98	450	3000	20.2602	0.102965	0.102465	0.72902	0.0691909	0.0210453	0.180744
99	556.343	7190.28	0.0571856	0.103966	0.103466	0.724121	0.0689217	0.0262233	0.180734	99	450	3000	20.2602	0.103966	0.103466	0.729106	0.0693321	0.0207744	0.180788
100	556.386	7191.59	0.0596068	0.104967	0.104466	0.724193	0.0690901	0.0259397	0.180777	100	450	3000	20.2602	0.104967	0.104466	0.729194	0.0694724	0.0205011	0.180833
101	556.431	7192.94	0.0621084	0.105966	0.105467	0.724264	0.069265	0.025649	0.180822	101	450	3000	20.2602	0.105966	0.105467	0.729285	0.0696105	0.0202255	0.180879
102	556.478	7194.34	0.0646949	0.106966	0.106466	0.724335	0.0694467	0.0253509	0.180867	102	450	3000	20.2602	0.106966	0.106466	0.729381	0.0697453	0.0199479	0.180926
103	556.526	7195.79	0.0673696	0.107967	0.107466	0.724405	0.0696356	0.0250453	0.180914	103	450	3000	20.2602	0.107967	0.107466	0.729481	0.069876	0.0196681	0.180974
104	556.576	7197.28	0.0701346	0.108967	0.108467	0.724475	0.0698318	0.0247322	0.180961	104	450	3000	20.2602	0.108967	0.108467	0.729588	0.0700014	0.0193863	0.181024
105	556.628	7198.83	0.0729913	0.109967	0.109467	0.724543	0.0700357	0.0244116	0.181009	105	450	3000	20.2602	0.109967	0.109467	0.729701	0.0701204	0.0191028	0.181076
106	556.681	7200.42	0.0759447	0.110967	0.110467	0.72461	0.0702477	0.0240834	0.181058	106	450	3000	20.2602	0.110967	0.110467	0.729822	0.0702322	0.0188175	0.181129
107	556.736	7202.07	0.0789968	0.111968	0.111468	0.724676	0.0704679	0.0237477	0.181109	107	450	3000	20.2602	0.111968	0.111468	0.729951	0.0703358	0.0185305	0.181183
108	556.793	7203.78	0.0821491	0.112968	0.112468	0.724739	0.0706968	0.0234046	0.181159	108	450	3000	20.2602	0.112968	0.112468	0.730089	0.0704306	0.018242	0.181239
109	556.848	7205.44	0.0852203	0.113893	0.113431	0.724796	0.0709212	0.0230744	0.181208	109	450	3000	20.2602	0.113893	0.113431	0.73023	0.0705129	0.0179632	0.181294
110	556.862	7205.86	0.0860062	0.114896	0.114395	0.72505	0.0709076	0.0227748	0.181267	110	450	3000	20.2602	0.114896	0.114395	0.730381	0.0705863	0.017683	0.18135
111	556.877	7206.3	0.0868236	0.115898	0.115397	0.725315	0.0708932	0.0224622	0.181329	111	450	3000	20.2602	0.115898	0.115397	0.730547	0.0706528	0.0173906	0.18141
112	556.892	7206.75	0.0876583	0.116896	0.116397	0.725586	0.0708784	0.0221429	0.181393	112	450	3000	20.2602	0.116896	0.116397	0.730723	0.0707093	0.0170978	0.18147
113	556.907	7207.22	0.0885119	0.117894	0.117395	0.725863	0.0708633	0.0218163	0.181457	113	450	3000	20.2602	0.117894	0.117395	0.730908	0.070756	0.0168047	0.181531
114	556.923	7207.69	0.0893852	0.118892	0.118393	0.726147	0.0708478	0.0214822	0.181523	114	450	3000	20.2602	0.118892	0.118393	0.731104	0.0707933	0.0165109	0.181592
115	556.939	7208.17	0.0902787	0.119891	0.119391	0.726436	0.070832	0.0211402	0.181591	115	450	3000	20.2602	0.119891	0.119391	0.73131	0.0708215	0.0162164	0.181652
116	556.955	7208.66	0.0911929	0.120892	0.120391	0.726733	0.0708158	0.0207902	0.181661	116	450	3000	20.2602	0.120892	0.120391	0.731529	0.0708411	0.0159211	0.181709
117	556.972	7209.17	0.0921265	0.121892	0.121392	0.727036	0.0707993	0.0204327	0.181732	117	450	3000	20.2602	0.121892	0.121392	0.731761	0.0708527	0.0156252	0.181761
118	556.989	7209.68	0.0930779	0.122891	0.122392	0.727345	0.0707824	0.0200684	0.181804	118	450	3000	20.2602	0.122891	0.122392	0.73201	0.0708568	0.0153296	0.181804
119	557.007	7210.21	0.0940494	0.123892	0.123391	0.727661	0.0707652	0.0196962	0.181878	119	450	3000	20.2602	0.123892	0.123391	0.732279	0.070854	0.0150339	0.181833
120	557.025	7210.74	0.0950376	0.12489	0.124391	0.727982	0.0707477	0.0193176	0.181953	120	450	3000	20.2602	0.12489	0.124391	0.732576	0.0708452	0.0147386	0.181841
121	557.043	7211.29	0.096044	0.125888	0.125389	0.728309	0.0707298	0.0189319	0.182029	121	450	3000	20.2602	0.125888	0.125389	0.732908	0.0708312	0.014444	0.181817
122	557.061	7211.84	0.0970693	0.126888	0.126388	0.728642	0.0707116	0.0185389	0.182107	122	450	3000	20.2602	0.126888	0.126388	0.73329	0.0708131	0.0141498	0.181747
123	557.08	7212.41	0.0981137	0.12789	0.127389	0.728982	0.070693	0.0181384	0.182187	123	450	3000	20.2602	0.12789	0.127389	0.733739	0.0707926	0.0138562	0.181612
124	557.099	7212.98	0.0991726	0.128888	0.128389	0.729326	0.0706742	0.0177323	0.182267	124	450	3000	20.2602	0.128888	0.128389	0.734275	0.0707718	0.0135641	0.181389
125	557.119	7213.56	0.100249	0.129889	0.129389	0.729677	0.0706551	0.0173192	0.182349	125	450	3000	20.2602	0.129889	0.129389	0.734927	0.0707539	0.0132738	0.181045
126	557.138	7214.15	0.101342	0.13089	0.13039	0.730032	0.0706356	0.0168998	0.182432	126	450	3000	20.2602	0.13089	0.13039	0.735729	0.0707431	0.0129852	0.180542
127	557.158	7214.75	0.102449	0.131889	0.13139	0.730393	0.0706159	0.0164749	0.182517	127	450	3000	20.2602	0.131889	0.13139	0.736722	0.070745	0.0126994	0.179834
128	557.179	7215.36	0.103571	0.132889	0.132389	0.730758	0.0705959	0.0160444	0.182602	128	450	3000	20.2602	0.132889	0.132389	0.737952	0.0707669	0.0124167	0.178864
129	557.199	7215.97	0.104706	0.133888	0.133388	0.731127	0.0705757	0.0156084	0.182688	129	450	3000	20.2602	0.133888	0.133388	0.739474	0.070818	0.0121375	0.177571
130	557.22	7216.59	0.105857	0.13489	0.134389	0.731502	0.0705552	0.0151664	0.182776	130	450	3000	20.2602	0.13489	0.134389	0.741349	0.0709093	0.0118621	0.17588
131	557.241	7217.22	0.107018	0.135889	0.135389	0.731881	0.0705344	0.0147202	0.182865	131	450	3000	20.2602	0.135889	0.135389	0.743636	0.0710537	0.0115912	0.173719
132	557.262	7217.85	0.108191	0.13689	0.136389	0.732263	0.0705135	0.0142694	0.182954	132	450	3000	20.2602	0.13689	0.136389	0.746396	0.0712656	0.0113256	0.171013
133	557.283	7218.49	0.109372	0.137887	0.137388	0.732648	0.0704924	0.0138153	0.183044	133	450	3000	20.2602	0.137887	0.137388	0.749685	0.0715604	0.0110656	0.167689
134	557.305	7219.14	0.110565	0.138889	0.138388	0.733037	0.0704711	0.0133566	0.183135	134	450	3000	20.2602	0.138889	0.138388	0.753555	0.0719546	0.0108113	0.163679
135	557.326	7219.78	0.111765	0.139887	0.139388	0.733428	0.0704496	0.0128952	0.183227	135	450	3000	20.2602	0.139887	0.139388	0.758046	0.072464	0.0105631	0.158927
136	557.348	7220.44	0.11297	0.140886	0.140387	0.733821	0.0704281	0.0124314	0.183319	136	450	3000	20.2602	0.140886	0.140387	0.763167	0.0731022	0.0103214	0.15341
137	557.37	7221.09	0.114183	0.141887	0.141387	0.734217	0.0704063	0.0119643	0.183412	137	450	3000	20.2602	0.141887	0.141387	0.768932	0.0738834	0.0100854	0.147099
138	557.392	7221.75	0.115402	0.142888	0.142388	0.734615	0.0703845	0.0114953	0.183505	138	450	3000	20.2602	0.142888	0.142388	0.775317	0.0748176	0.00985503	0.140011
139	557.414	7222.41	0.116623	0.143889	0.143389	0.735014	0.0703626	0.0110252	0.183598	139	450	3000	20.2602	0.143889	0.143389	0.78226	0.0759097	0.00963023	0.1322
140	557.436	7223.07	0.117844	0.14489	0.144389	0.735413	0.0703407	0.0105547	0.183692	140	450	3000	20.2602	0.14489	0.144389	0.78968	0.0771609	0.00941049	0.123749
141	557.458	7223.73	0.119065	0.14589	0.14539	0.735812	0.0703188	0.0100842	0.183785	141	450	3000	20.2602	0.14589	0.14539	0.79747	0.0785691	0.00919514	0.114766
142	557.48	7224.39	0.120284	0.146891	0.14639	0.73621	0.0702969	0.00961433	0.183879	142	450	3000	20.2602	0.146891	0.14639	0.805507	0.080129	0.00898329	0.105381
143	557.502	7225.05	0.121497	0.147889	0.14739	0.736607	0.0702751	0.00914656	0.183972	143	450	3000	20.2602	0.147889	0.14739	0.813634	0.0818295	0.00877441	0.0957619
144	557.508	7225.24	0.121854	0.147955	0.147922	0.736723	0.0702687	0.00900897	0.183999	144	450	3000	20.2602	0.147955	0.147922	0.817938	0.0827884	0.00866399	0.0906096
145	572.009	7780.36	0.927462	0.148955	0.148455	0.898898	0.0886083	0.0124934	1.17684e-16	145	450	3000	20.2602	0.148955	0.148455	0.822207	0.0837839	0.00855389	0.0854556
146	572.069	7782.74	0.930776	0.149955	0.149455	0.899979	0.0885586	0.0114622	1.08802e-16	146	450	3000	20.2602	0.149955	0.149455	0.830044	0.0857432	0.00834815	0.0758652
147	572.112	7784.49	0.933205	0.150954	0.150454	0.900772	0.088522	0.0107057	2.28706e-16	147	450	3000	20.2602	0.150954	0.150454	0.837501	0.0878105	0.00814285	0.0665461
148	572.155	7786.21	0.935584	0.151953	0.151454	0.901549	0.0884862	0.00996469	1.29896e-16	148	450	3000	20.2602	0.151953	0.151454	0.844435	0.0899765	0.00793744	0.0576515
149	572.197	7787.88	0.937908	0.152954	0.152454	0.902309	0.0884511	0.00924026	1.88738e-16	149	450	3000	20.2602	0.152954	0.152454	0.850726	0.0922364	0.00773132	0.0493059
150	572.234	7789.37	0.939974	0.153861	0.153408	0.902984	0.0884199	0.00859624	2.32037e-16	150	450	3000	20.2602	0.153861	0.153408	0.856034	0.0944764	0.0075338	0.0419557
151	573.292	7831.69	0.998762	0.154861	0.154361	0.901841	0.090463	0.00769572	1.28786e-16	151	450	3000	20.2602	0.154861	0.154361	0.860598	0.0967991	0.00733527	0.0352671
152	574.387	7875.5	1.05962	0.155861	0.155361	0.900508	0.0926201	0.00687167	2.93099e-16	152	450	3000	20.2602	0.155861	0.155361	0.864543	0.0993281	0.00712593	0.0290033
153	575.523	7920.93	1.12273	0.156861	0.156361	0.89898	0.0948998	0.0061199	3.88578e-17	153	450	3000	20.2602	0.156861	0.156361	0.867604	0.10196	0.00691542	0.0235205
154	576.703	7968.12	1.1883	0.157861	0.157361	0.897251	0.0973128	0.00543605	1.5099e-16	154	450	3000	20.2602	0.157861	0.157361	0.869786	0.104705	0.0067039	0.0188049
155	577.931	8017.25	1.25655	0.158861	0.158361	0.895313	0.0998709	0.00481579	3.66374e-17	155	450	3000	20.2602	0.158861	0.158361	0.871115	0.107574	0.00649155	0.0148196
156	579.212	8068.48	1.3277	0.159861	0.159361	0.893159	0.102586	0.0042549	2.67564e-16	156	450	3000	20.2602	0.159861	0.159361	0.871635	0.110576	0.00627868	0.0115098
157	580.549	8121.97	1.40202	0.160861	0.160361	0.890778	0.105473	0.00374918	1.19904e-16	157	450	3000	20.2602	0.160861	0.160361	0.871406	0.11372	0.00606558	0.00880868
158	581.948	8177.92	1.47974	0.161861	0.161361	0.888159	0.108546	0.00329458	1.2379e-16	158	450	3000	20.2602	0.161861	0.161361	0.870494	0.117012	0.00585259	0.00664209
159	583.413	8236.52	1.56114	0.162861	0.162361	0.88529	0.111823	0.00288718	1.2379e-16	159	450	3000	20.2602	0.162861	0.162361	0.868974	0.120452	0.00564001	0.00493411
160	584.949	8297.96	1.64649	0.163861	0.163361	0.882157	0.11532	0.00252315	1.08247e-16	160	450	3000	20.2602	0.163861	0.163361	0.866924	0.124038	0.00542817	0.00361067
161	586.561	8362.45	1.73608	0.164861	0.164361	0.878744	0.119057	0.00219891	1.29063e-16	161	450	3000	20.2602	0.164861	0.164361	0.864421	0.127759	0.00521736	0.00260264
162	588.255	8430.2	1.8302	0.165861	0.165361	0.875034	0.123055	0.00191099	1.34059e-16	162	450	3000	20.2602	0.165861	0.165361	0.861543	0.131601	0.00500785	0.00184785
163	590.036	8501.43	1.92915	0.166861	0.166361	0.871007	0.127337	0.0016561	2.48968e-16	163	450	3000	20.2602	0.166861	0.166361	0.858365	0.135543	0.00479988	0.00129218
164	591.909	8576.35	2.03328	0.167861	0.167361	0.866641	0.131928	0.00143116	4.71845e-17	164	450	3000	20.2602	0.167861	0.167361	0.854956	0.13956	0.00459366	0.000889972
165	593.879	8655.16	2.14284	0.168861	0.168361	0.861913	0.136853	0.00123328	1.69864e-16	165	450	3000	20.2602	0.168861	0.168361	0.851386	0.143621	0.0043894	0.00060371
166	595.952	8738.08	2.25804	0.169861	0.169361	0.8568	0.142141	0.00105976	4.48253e-17	166	450	3000	20.2602	0.169861	0.169361	0.847717	0.147692	0.00418725	0.000403355
167	598.133	8825.3	2.37912	0.170861	0.170361	0.851273	0.147819	0.000908085	9.11771e-17	167	450	3000	20.2602	0.170861	0.170361	0.84401	0.151737	0.00398735	0.000265445
168	600.425	8917	2.50643	0.171861	0.171361	0.845305	0.153919	0.000775922	1.82215e-16	168	450	3000	20.2602	0.171861	0.171361	0.840317	0.155721	0.00378981	0.000172081
169	602.833	9013.33	2.64016	0.172861	0.172361	0.838868	0.160471	0.000661132	1.59178e-16	169	450	3000	20.2602	0.172861	0.172361	0.836689	0.159607	0.00359471	0.000109916
170	605.36	9114.39	2.78048	0.173861	0.173361	0.831931	0.167507	0.000561755	2.18159e-16	170	450	3000	20.2602	0.173861	0.173361	0.833168	0.163361	0.00340211	6.92139e-05
171	607.603	9204.11	2.90504	0.17471	0.174286	0.825621	0.173891	0.000487334	2.01783e-16	171	450	3000	20.2602	0.17471	0.174286	0.83004	0.166689	0.00322633	4.44893e-05
172	618.935	9612.73	3.53451	0.175465	0.175088	0.806994	0.192586	0.000420047	3.74076e-16	172	450	3000	20.2602	0.175465	0.175088	0.827446	0.169448	0.00307563	2.9919e-05
173	618.953	9613.34	3.53549	0.176462	0.175964	0.807034	0.192599	0.000366931	4.37705e-16	173	450	3000	20.2602	0.176462	0.175964	0.824751	0.172317	0.00291284	1.91838e-05
174	618.969	9613.9	3.53637	0.177462	0.176962	0.807071	0.192611	0.000318329	9.5729e-16	174	450	3000	20.2602	0.177462	0.176962	0.82187	0.175389	0.00272963	1.14316e-05
175	618.983	9614.41	3.53718	0.178465	0.177964	0.807104	0.192621	0.000274128	3.65818e-16	175	450	3000	20.2602	0.178465	0.177964	0.819197	0.178248	0.00254848	6.70354e-06
176	618.996	9614.87	3.53791	0.179463	0.178964	0.807135	0.192631	0.000234367	1.99632e-16	176	450	3000	20.2602	0.179463	0.178964	0.816743	0.180883	0.00236989	3.87443e-06
177	619.008	9615.28	3.53856	0.180463	0.179963	0.807162	0.19264	0.000198701	4.15154e-16	177	450	3000	20.2602	0.180463	0.179963	0.814506	0.183298	0.00219396	2.20822e-06
178	619.019	9615.65	3.53915	0.181467	0.180965	0.807186	0.192647	0.000166811	2.17291e-16	178	450	3000	20.2602	0.181467	0.180965	0.812466	0.185513	0.00201986	1.23844e-06
179	619.028	9615.98	3.53966	0.182466	0.181967	0.807207	0.192654	0.000138756	3.27047e-16	179	450	3000	20.2602	0.182466	0.181967	0.810615	0.187536	0.001848	6.84473e-07
180	619.036	9616.26	3.54011	0.18347	0.182968	0.807226	0.19266	0.000114072	1.96076e-16	180	450	3000	20.2602	0.18347	0.182968	0.808935	0.189386	0.00167832	3.72859e-07
181	619.043	9616.51	3.5405	0.184469	0.18397	0.807242	0.192665	9.27544e-05	4.87249e-16	181	450	3000	20.2602	0.184469	0.18397	0.807407	0.191082	0.00151083	2.00281e-07
182	619.049	9616.72	3.54084	0.185467	0.184968	0.807256	0.192669	7.4421e-05	7.79498e-16	182	450	3000	20.2602	0.185467	0.184968	0.806012	0.192642	0.00134588	1.0625e-07
183	619.054	9616.9	3.54112	0.186461	0.185964	0.807268	0.192673	5.88775e-05	2.55308e-16	183	450	3000	20.2602	0.186461	0.185964	0.804726	0.194091	0.00118317	5.56343e-08
184	619.059	9617.05	3.54136	0.18746	0.186961	0.807278	0.192676	4.5763e-05	5.98809e-16	184	450	3000	20.2602	0.18746	0.186961	0.803526	0.195451	0.00102226	2.87183e-08
185	619.062	9617.17	3.54156	0.188457	0.187959	0.807286	0.192679	3.49262e-05	9.54705e-17	185	450	3000	20.2602	0.188457	0.187959	0.802395	0.196742	0.000862954	1.46101e-08
186	619.065	9617.28	3.54173	0.189468	0.188963	0.807293	0.192681	2.59907e-05	9.8194e-17	186	450	3000	20.2602	0.189468	0.188963	0.801313	0.197983	0.000704522	7.31574e-09
187	619.067	9617.36	3.54185	0.190471	0.18997	0.807298	0.192683	1.89051e-05	4.48281e-16	187	450	3000	20.2602	0.190471	0.18997	0.800269	0.199184	0.000547347	3.62909e-09
188	619.068	9617.39	3.5419	0.190847	0.190659	0.8073	0.192683	1.63644e-05	1.81652e-16	188	450	3000	20.2602	0.190847	0.190659	0.799572	0.199987	0.000440727	2.18694e-09
189	625.172	9831.01	3.88096	0.191847	0.191347	0.79662	0.203369	1.07309e-05	1.42036e-15	189	450	3000	20.2602	0.191847	0.191347	0.79889	0.200775	0.00033517	1.29121e-09
190	626.392	9873.73	3.94875	0.192037	0.191942	0.794445	0.205546	9.73991e-06	1.80752e-15	190	450	3000	20.2602	0.192037	0.191942	0.798307	0.201448	0.000244392	7.80649e-10
191	626.406	9874.2	3.94951	0.192037	0.192037	0.794445	0.205545	9.73972e-06	1.80752e-15	191	450	3000	20.2602	0.192037	0.192037	0.798214	0.201556	0.0002299	7.12963e-10
192	647.664	10441.6	5.13042	0.193036	0.192537	0.796116	0.203878	6.28762e-06	5.29524e-17	192	450	3000	20.2602	0.193036	0.192537	0.797731	0.202115	0.000154261	4.16871e-10
193	647.683	10442.1	5.13146	0.194035	0.193536	0.796775	0.203221	4.18016e-06	5.29524e-17	193	450	3000	20.2602	0.194035	0.193536	0.796775	0.203221	4.18016e-06	4.16871e-10
Bozdag Path 3_3: Primary										Bozdag Path 3_3: Diffused
shell	temperature (｡C)	pressure (bar)	tot.time (my)	radius (cm)	X(node) (cm)	Xfe	Xmg	Xmn	Xca	shell	temperature (｡C)	pressure (bar)	tot.time (my)	radius (cm)	X(node) (cm)	Xfe	Xmg	Xmn	Xca
1	555.377	7161.31	0.00358618	0.00101074	0.000505369	0.721912	0.0653954	0.033049	0.179643	1	450	3000	20.2602	0.00101074	0.000505369	0.729326	0.0660064	0.0249325	0.179735
2	555.382	7161.45	0.00384589	0.00202027	0.0015155	0.721926	0.0654116	0.0330134	0.179649	2	450	3000	20.2602	0.00202027	0.0015155	0.729327	0.0660076	0.0249298	0.179736
3	555.387	7161.6	0.00411914	0.00302638	0.00252332	0.72194	0.0654286	0.0329761	0.179655	3	450	3000	20.2602	0.00302638	0.00252332	0.729332	0.0660126	0.0249181	0.179738
4	555.392	7161.75	0.00440594	0.00402617	0.00352628	0.721955	0.0654465	0.0329369	0.179662	4	450	3000	20.2602	0.00402617	0.00352628	0.729339	0.0660202	0.0249002	0.17974
5	555.397	7161.92	0.0047063	0.00501808	0.00452213	0.721971	0.0654652	0.0328958	0.179668	5	450	3000	20.2602	0.00501808	0.00452213	0.729349	0.0660301	0.0248768	0.179744
6	555.403	7162.09	0.00502472	0.00601897	0.00551853	0.721987	0.0654851	0.0328524	0.179675	6	450	3000	20.2602	0.00601897	0.00551853	0.729362	0.0660424	0.024848	0.179748
7	555.409	7162.27	0.00536121	0.0070191	0.00651903	0.722004	0.0655061	0.0328065	0.179683	7	450	3000	20.2602	0.0070191	0.00651903	0.729376	0.066057	0.0248137	0.179753
8	555.415	7162.46	0.00571576	0.00801814	0.00751862	0.722023	0.0655282	0.0327582	0.179691	8	450	3000	20.2602	0.00801814	0.00751862	0.729393	0.0660737	0.0247741	0.179759
9	555.422	7162.66	0.00608838	0.00901349	0.00851582	0.722042	0.0655515	0.0327075	0.179699	9	450	3000	20.2602	0.00901349	0.00851582	0.729413	0.0660926	0.0247292	0.179765
10	555.429	7162.88	0.00648358	0.0100186	0.00951604	0.722062	0.0655763	0.0326537	0.179708	10	450	3000	20.2602	0.0100186	0.00951604	0.729435	0.0661138	0.024679	0.179773
11	555.437	7163.1	0.00690137	0.0110251	0.0105218	0.722083	0.0656024	0.0325969	0.179717	11	450	3000	20.2602	0.0110251	0.0105218	0.729459	0.0661373	0.0246232	0.179781
12	555.445	7163.34	0.00733722	0.0120191	0.0115221	0.722105	0.0656298	0.0325378	0.179727	12	450	3000	20.2602	0.0120191	0.0115221	0.729486	0.0661627	0.0245624	0.179789
13	555.453	7163.59	0.00779565	0.013017	0.012518	0.722129	0.0656585	0.0324757	0.179737	13	450	3000	20.2602	0.013017	0.012518	0.729514	0.0661903	0.0244968	0.179799
14	555.462	7163.85	0.00827667	0.0140116	0.0135143	0.722153	0.0656887	0.0324106	0.179748	14	450	3000	20.2602	0.0140116	0.0135143	0.729546	0.0662199	0.0244259	0.179809
15	555.471	7164.12	0.00878479	0.0150147	0.0145131	0.722178	0.0657207	0.0323418	0.179759	15	450	3000	20.2602	0.0150147	0.0145131	0.729579	0.0662518	0.0243497	0.179819
16	555.48	7164.41	0.00932001	0.0160193	0.015517	0.722205	0.0657544	0.0322696	0.179771	16	450	3000	20.2602	0.0160193	0.015517	0.729615	0.066286	0.0242679	0.179831
17	555.49	7164.71	0.00987781	0.0170146	0.0165169	0.722233	0.0657895	0.0321944	0.179783	17	450	3000	20.2602	0.0170146	0.0165169	0.729653	0.0663223	0.0241813	0.179843
18	555.501	7165.03	0.0104627	0.0180135	0.017514	0.722262	0.0658264	0.0321156	0.179796	18	450	3000	20.2602	0.0180135	0.017514	0.729694	0.0663607	0.0240899	0.179856
19	555.512	7165.36	0.0110747	0.0190099	0.0185117	0.722292	0.0658651	0.0320334	0.17981	19	450	3000	20.2602	0.0190099	0.0185117	0.729736	0.0664013	0.0239934	0.179869
20	555.524	7165.71	0.0117183	0.0200135	0.0195117	0.722323	0.0659058	0.031947	0.179824	20	450	3000	20.2602	0.0200135	0.0195117	0.729781	0.0664443	0.0238916	0.179883
21	555.536	7166.07	0.012389	0.0210097	0.0205116	0.722356	0.0659483	0.0318572	0.179838	21	450	3000	20.2602	0.0210097	0.0205116	0.729828	0.0664896	0.0237848	0.179898
22	555.548	7166.45	0.0130914	0.022011	0.0215103	0.72239	0.0659928	0.0317632	0.179854	22	450	3000	20.2602	0.022011	0.0215103	0.729876	0.0665372	0.0236732	0.179913
23	555.561	7166.84	0.0138253	0.0230111	0.0225111	0.722426	0.0660394	0.0316653	0.17987	23	450	3000	20.2602	0.0230111	0.0225111	0.729927	0.0665874	0.0235564	0.17993
24	555.575	7167.26	0.0145909	0.0240109	0.023511	0.722462	0.0660881	0.0315634	0.179886	24	450	3000	20.2602	0.0240109	0.023511	0.729979	0.0666399	0.0234347	0.179947
25	555.59	7167.69	0.0153881	0.0250086	0.0245097	0.7225	0.0661389	0.0314574	0.179903	25	450	3000	20.2602	0.0250086	0.0245097	0.730032	0.066695	0.0233084	0.179964
26	555.605	7168.14	0.0162214	0.0260107	0.0255097	0.72254	0.0661921	0.0313469	0.179921	26	450	3000	20.2602	0.0260107	0.0255097	0.730087	0.0667527	0.0231771	0.179983
27	555.62	7168.61	0.0170908	0.0270128	0.0265118	0.72258	0.0662477	0.0312318	0.17994	27	450	3000	20.2602	0.0270128	0.0265118	0.730144	0.0668133	0.0230407	0.180002
28	555.637	7169.1	0.0179964	0.0280138	0.0275133	0.722623	0.0663057	0.0311123	0.179959	28	450	3000	20.2602	0.0280138	0.0275133	0.730202	0.0668766	0.0228996	0.180022
29	555.654	7169.61	0.0189381	0.0290118	0.0285128	0.722666	0.0663662	0.0309883	0.17998	29	450	3000	20.2602	0.0290118	0.0285128	0.73026	0.0669427	0.0227541	0.180043
30	555.671	7170.14	0.0199205	0.0300121	0.029512	0.722711	0.0664294	0.0308593	0.18	30	450	3000	20.2602	0.0300121	0.029512	0.73032	0.0670116	0.022604	0.180064
31	555.69	7170.69	0.0209435	0.0310105	0.0305113	0.722757	0.0664953	0.0307253	0.180022	31	450	3000	20.2602	0.0310105	0.0305113	0.73038	0.0670836	0.0224493	0.180087
32	555.709	7171.27	0.0220117	0.0320123	0.0315114	0.722805	0.0665643	0.0305858	0.180045	32	450	3000	20.2602	0.0320123	0.0315114	0.730441	0.0671588	0.02229	0.18011
33	555.729	7171.87	0.023125	0.0330134	0.0325129	0.722855	0.0666364	0.0304408	0.180068	33	450	3000	20.2602	0.0330134	0.0325129	0.730503	0.0672373	0.0221259	0.180134
34	555.75	7172.5	0.0242835	0.0340135	0.0335134	0.722906	0.0667115	0.0302904	0.180092	34	450	3000	20.2602	0.0340135	0.0335134	0.730564	0.0673191	0.0219576	0.180159
35	555.772	7173.15	0.0254917	0.0350159	0.0345147	0.722958	0.0667901	0.0301341	0.180117	35	450	3000	20.2602	0.0350159	0.0345147	0.730626	0.0674044	0.0217849	0.180185
36	555.794	7173.83	0.0267496	0.0360177	0.0355168	0.723013	0.0668721	0.0299719	0.180143	36	450	3000	20.2602	0.0360177	0.0355168	0.730688	0.0674933	0.0216076	0.180211
37	555.818	7174.54	0.0280571	0.0370182	0.036518	0.723068	0.0669576	0.0298039	0.18017	37	450	3000	20.2602	0.0370182	0.036518	0.730749	0.0675858	0.0214264	0.180239
38	555.842	7175.27	0.0294144	0.0380163	0.0375173	0.723125	0.0670466	0.0296302	0.180198	38	450	3000	20.2602	0.0380163	0.0375173	0.73081	0.0676818	0.0212413	0.180267
39	555.868	7176.03	0.0308258	0.0390155	0.0385159	0.723183	0.0671394	0.0294503	0.180227	39	450	3000	20.2602	0.0390155	0.0385159	0.73087	0.0677814	0.0210523	0.180297
40	555.894	7176.83	0.032296	0.0400172	0.0395164	0.723243	0.0672363	0.0292636	0.180257	40	450	3000	20.2602	0.0400172	0.0395164	0.730929	0.0678852	0.020859	0.180327
41	555.922	7177.65	0.0338203	0.0410153	0.0405163	0.723305	0.0673371	0.0290709	0.180287	41	450	3000	20.2602	0.0410153	0.0405163	0.730987	0.0679927	0.0206619	0.180358
42	555.95	7178.51	0.0354034	0.0420147	0.041515	0.723367	0.0674421	0.0288716	0.180319	42	450	3000	20.2602	0.0420147	0.041515	0.731044	0.068104	0.0204612	0.18039
43	555.98	7179.4	0.0370497	0.0430159	0.0425153	0.723431	0.0675517	0.0286653	0.180352	43	450	3000	20.2602	0.0430159	0.0425153	0.731101	0.0682194	0.0202565	0.180424
44	556.011	7180.32	0.0387592	0.0440175	0.0435167	0.723496	0.0676659	0.0284522	0.180386	44	450	3000	20.2602	0.0440175	0.0435167	0.731156	0.0683387	0.0200479	0.180458
45	556.043	7181.28	0.040532	0.0450186	0.044518	0.723563	0.0677847	0.0282324	0.18042	45	450	3000	20.2602	0.0450186	0.044518	0.73121	0.0684617	0.0198358	0.180493
46	556.076	7182.27	0.042368	0.0460183	0.0455184	0.72363	0.0679082	0.0280059	0.180456	46	450	3000	20.2602	0.0460183	0.0455184	0.731263	0.0685881	0.0196204	0.180529
47	556.11	7183.3	0.0442717	0.0470192	0.0465188	0.723698	0.0680368	0.0277723	0.180493	47	450	3000	20.2602	0.0470192	0.0465188	0.731315	0.0687177	0.0194018	0.180566
48	556.146	7184.37	0.0462432	0.0480193	0.0475193	0.723767	0.0681704	0.0275319	0.18053	48	450	3000	20.2602	0.0480193	0.0475193	0.731366	0.0688501	0.0191799	0.180604
49	556.182	7185.47	0.0482825	0.0490182	0.0485188	0.723837	0.0683092	0.0272846	0.180569	49	450	3000	20.2602	0.0490182	0.0485188	0.731417	0.0689848	0.018955	0.180643
50	556.22	7186.61	0.0503952	0.0500188	0.0495185	0.723908	0.0684535	0.0270301	0.180609	50	450	3000	20.2602	0.0500188	0.0495185	0.731468	0.0691213	0.0187272	0.180683
51	556.26	7187.79	0.0525832	0.05102	0.0505194	0.723979	0.0686037	0.0267683	0.180649	51	450	3000	20.2602	0.05102	0.0505194	0.73152	0.0692591	0.0184962	0.180725
52	556.301	7189.02	0.0548454	0.0520202	0.0515201	0.72405	0.0687596	0.0264994	0.180691	52	450	3000	20.2602	0.0520202	0.0515201	0.731573	0.0693973	0.0182624	0.180767
53	556.343	7190.28	0.0571856	0.0530208	0.0525205	0.724121	0.0689217	0.0262233	0.180734	53	450	3000	20.2602	0.0530208	0.0525205	0.731628	0.0695349	0.0180261	0.180811
54	556.386	7191.59	0.0596068	0.0540217	0.0535212	0.724193	0.0690901	0.0259397	0.180777	54	450	3000	20.2602	0.0540217	0.0535212	0.731686	0.069671	0.0177872	0.180856
55	556.431	7192.94	0.0621084	0.0550213	0.0545215	0.724264	0.069265	0.025649	0.180822	55	450	3000	20.2602	0.0550213	0.0545215	0.731748	0.0698046	0.0175461	0.180902
56	556.478	7194.34	0.0646949	0.0560212	0.0555212	0.724335	0.0694467	0.0253509	0.180867	56	450	3000	20.2602	0.0560212	0.0555212	0.731814	0.0699345	0.0173028	0.180949
57	556.526	7195.79	0.0673696	0.0570214	0.0565213	0.724405	0.0696356	0.0250453	0.180914	57	450	3000	20.2602	0.0570214	0.0565213	0.731885	0.0700598	0.0170574	0.180997
58	556.576	7197.28	0.0701346	0.0580216	0.0575215	0.724475	0.0698318	0.0247322	0.180961	58	450	3000	20.2602	0.0580216	0.0575215	0.731963	0.0701795	0.0168099	0.181047
59	556.628	7198.83	0.0729913	0.0590214	0.0585215	0.724543	0.0700357	0.0244116	0.181009	59	450	3000	20.2602	0.0590214	0.0585215	0.732048	0.0702924	0.0165607	0.181099
60	556.681	7200.42	0.0759447	0.0600221	0.0595217	0.72461	0.0702477	0.0240834	0.181058	60	450	3000	20.2602	0.0600221	0.0595217	0.732141	0.0703978	0.0163097	0.181152
61	556.736	7202.07	0.0789968	0.0610228	0.0605224	0.724676	0.0704679	0.0237477	0.181109	61	450	3000	20.2602	0.0610228	0.0605224	0.732242	0.070495	0.016057	0.181206
62	556.793	7203.78	0.0821491	0.0620233	0.0615231	0.724739	0.0706968	0.0234046	0.181159	62	450	3000	20.2602	0.0620233	0.0615231	0.732352	0.0705831	0.0158029	0.181262
63	556.848	7205.44	0.0852203	0.0629483	0.0624858	0.724796	0.0709212	0.0230744	0.181208	63	450	3000	20.2602	0.0629483	0.0624858	0.732467	0.070659	0.0155572	0.181317
64	556.862	7205.86	0.0860062	0.0639506	0.0634494	0.72505	0.0709076	0.0227748	0.181267	64	450	3000	20.2602	0.0639506	0.0634494	0.732591	0.0707261	0.0153101	0.181373
65	556.877	7206.3	0.0868236	0.0649524	0.0644515	0.725315	0.0708932	0.0224622	0.181329	65	450	3000	20.2602	0.0649524	0.0644515	0.732729	0.0707862	0.0150523	0.181433
66	556.892	7206.75	0.0876583	0.0659505	0.0654514	0.725586	0.0708784	0.0221429	0.181393	66	450	3000	20.2602	0.0659505	0.0654514	0.732877	0.0708364	0.014794	0.181493
67	556.907	7207.22	0.0885119	0.0669486	0.0664495	0.725863	0.0708633	0.0218163	0.181457	67	450	3000	20.2602	0.0669486	0.0664495	0.733034	0.0708771	0.0145354	0.181554
68	556.923	7207.69	0.0893852	0.0679467	0.0674476	0.726147	0.0708478	0.0214822	0.181523	68	450	3000	20.2602	0.0679467	0.0674476	0.733201	0.0709086	0.0142762	0.181614
69	556.939	7208.17	0.0902787	0.0689459	0.0684463	0.726436	0.070832	0.0211402	0.181591	69	450	3000	20.2602	0.0689459	0.0684463	0.733379	0.0709314	0.0140164	0.181673
70	556.955	7208.66	0.0911929	0.0699467	0.0694463	0.726733	0.0708158	0.0207902	0.181661	70	450	3000	20.2602	0.0699467	0.0694463	0.73357	0.0709459	0.0137558	0.181729
71	556.972	7209.17	0.0921265	0.070947	0.0704469	0.727036	0.0707993	0.0204327	0.181732	71	450	3000	20.2602	0.070947	0.0704469	0.733774	0.0709527	0.0134949	0.181778
72	556.989	7209.68	0.0930779	0.0719458	0.0714464	0.727345	0.0707824	0.0200684	0.181804	72	450	3000	20.2602	0.0719458	0.0714464	0.733996	0.0709523	0.0132341	0.181818
73	557.007	7210.21	0.0940494	0.0729467	0.0724463	0.727661	0.0707652	0.0196962	0.181878	73	450	3000	20.2602	0.0729467	0.0724463	0.73424	0.0709453	0.0129734	0.181842
74	557.025	7210.74	0.0950376	0.0739445	0.0734456	0.727982	0.0707477	0.0193176	0.181953	74	450	3000	20.2602	0.0739445	0.0734456	0.734512	0.0709325	0.0127132	0.181842
75	557.043	7211.29	0.096044	0.0749433	0.0744439	0.728309	0.0707298	0.0189319	0.182029	75	450	3000	20.2602	0.0749433	0.0744439	0.734824	0.0709148	0.0124537	0.181808
76	557.061	7211.84	0.0970693	0.0759433	0.0754433	0.728642	0.0707116	0.0185389	0.182107	76	450	3000	20.2602	0.0759433	0.0754433	0.735188	0.0708933	0.0121947	0.181724
77	557.08	7212.41	0.0981137	0.0769451	0.0764442	0.728982	0.070693	0.0181384	0.182187	77	450	3000	20.2602	0.0769451	0.0764442	0.735624	0.0708697	0.0119363	0.18157
78	557.099	7212.98	0.0991726	0.0779433	0.0774442	0.729326	0.0706742	0.0177323	0.182267	78	450	3000	20.2602	0.0779433	0.0774442	0.736154	0.0708464	0.0116795	0.18132
79	557.119	7213.56	0.100249	0.0789443	0.0784438	0.729677	0.0706551	0.0173192	0.182349	79	450	3000	20.2602	0.0789443	0.0784438	0.736806	0.0708267	0.0114244	0.180943
80	557.138	7214.15	0.101342	0.0799449	0.0794446	0.730032	0.0706356	0.0168998	0.182432	80	450	3000	20.2602	0.0799449	0.0794446	0.737618	0.0708148	0.011171	0.180396
81	557.158	7214.75	0.102449	0.0809439	0.0804444	0.730393	0.0706159	0.0164749	0.182517	81	450	3000	20.2602	0.0809439	0.0804444	0.73863	0.0708169	0.0109202	0.179633
82	557.179	7215.36	0.103571	0.0819434	0.0814436	0.730758	0.0705959	0.0160444	0.182602	82	450	3000	20.2602	0.0819434	0.0814436	0.739891	0.0708405	0.0106725	0.178596
83	557.199	7215.97	0.104706	0.0829428	0.0824431	0.731127	0.0705757	0.0156084	0.182688	83	450	3000	20.2602	0.0829428	0.0824431	0.741457	0.0708949	0.010428	0.17722
84	557.22	7216.59	0.105857	0.0839445	0.0834436	0.731502	0.0705552	0.0151664	0.182776	84	450	3000	20.2602	0.0839445	0.0834436	0.743389	0.0709919	0.0101869	0.175433
85	557.241	7217.22	0.107018	0.0849439	0.0844442	0.731881	0.0705344	0.0147202	0.182865	85	450	3000	20.2602	0.0849439	0.0844442	0.745746	0.0711444	0.00995013	0.173159
86	557.262	7217.85	0.108191	0.0859444	0.0854441	0.732263	0.0705135	0.0142694	0.182954	86	450	3000	20.2602	0.0859444	0.0854441	0.748588	0.0713672	0.00971808	0.170327
87	557.283	7218.49	0.109372	0.0869422	0.0864433	0.732648	0.0704924	0.0138153	0.183044	87	450	3000	20.2602	0.0869422	0.0864433	0.751969	0.0716758	0.00949118	0.166864
88	557.305	7219.14	0.110565	0.0879436	0.0874429	0.733037	0.0704711	0.0133566	0.183135	88	450	3000	20.2602	0.0879436	0.0874429	0.75594	0.0720866	0.00926943	0.162704
89	557.326	7219.78	0.111765	0.0889423	0.0884429	0.733428	0.0704496	0.0128952	0.183227	89	450	3000	20.2602	0.0889423	0.0884429	0.760536	0.0726156	0.00905303	0.157796
90	557.348	7220.44	0.11297	0.0899407	0.0894415	0.733821	0.0704281	0.0124314	0.183319	90	450	3000	20.2602	0.0899407	0.0894415	0.765761	0.0732757	0.00884241	0.152121
91	557.37	7221.09	0.114183	0.0909421	0.0904414	0.734217	0.0704063	0.0119643	0.183412	91	450	3000	20.2602	0.0909421	0.0904414	0.771625	0.0740808	0.00863688	0.145657
92	557.392	7221.75	0.115402	0.0919431	0.0914426	0.734615	0.0703845	0.0114953	0.183505	92	450	3000	20.2602	0.0919431	0.0914426	0.778098	0.0750405	0.00843626	0.138425
93	557.414	7222.41	0.116623	0.0929442	0.0924437	0.735014	0.0703626	0.0110252	0.183598	93	450	3000	20.2602	0.0929442	0.0924437	0.785113	0.0761587	0.00824048	0.130487
94	557.436	7223.07	0.117844	0.0939444	0.0934443	0.735413	0.0703407	0.0105547	0.183692	94	450	3000	20.2602	0.0939444	0.0934443	0.792583	0.0774363	0.00804907	0.121931
95	557.458	7223.73	0.119065	0.0949448	0.0944446	0.735812	0.0703188	0.0100842	0.183785	95	450	3000	20.2602	0.0949448	0.0944446	0.800397	0.0788702	0.00786144	0.112871
96	557.48	7224.39	0.120284	0.0959456	0.0954452	0.73621	0.0702969	0.00961433	0.183879	96	450	3000	20.2602	0.0959456	0.0954452	0.808428	0.0804549	0.00767681	0.10344
97	557.502	7225.05	0.121497	0.0969439	0.0964447	0.736607	0.0702751	0.00914656	0.183972	97	450	3000	20.2602	0.0969439	0.0964447	0.816518	0.0821786	0.00749471	0.0938082
98	557.508	7225.24	0.121854	0.0970099	0.0969769	0.736723	0.0702687	0.00900897	0.183999	98	450	3000	20.2602	0.0970099	0.0969769	0.820789	0.0831492	0.00739843	0.0886631
99	572.009	7780.36	0.927462	0.0980095	0.0975097	0.898898	0.0886083	0.0124934	1.17684e-16	99	450	3000	20.2602	0.0980095	0.0975097	0.825015	0.084156	0.00730241	0.0835262
100	572.069	7782.74	0.930776	0.0990094	0.0985094	0.899979	0.0885586	0.0114622	1.08802e-16	100	450	3000	20.2602	0.0990094	0.0985094	0.832749	0.0861352	0.00712297	0.0739929
101	572.112	7784.49	0.933205	0.100009	0.0995091	0.900772	0.088522	0.0107057	2.28706e-16	101	450	3000	20.2602	0.100009	0.0995091	0.840074	0.0882211	0.0069439	0.0647608
102	572.155	7786.21	0.935584	0.101008	0.100509	0.901549	0.0884862	0.00996469	1.29896e-16	102	450	3000	20.2602	0.101008	0.100509	0.846852	0.0904047	0.00676476	0.0559788
103	572.197	7787.88	0.937908	0.102009	0.101508	0.902309	0.0884511	0.00924026	1.88738e-16	103	450	3000	20.2602	0.102009	0.101508	0.852967	0.0926818	0.00658504	0.047766
104	572.234	7789.37	0.939974	0.102916	0.102462	0.902984	0.0884199	0.00859624	2.32037e-16	104	450	3000	20.2602	0.102916	0.102462	0.858093	0.0949383	0.0064129	0.0405555
105	573.292	7831.69	0.998762	0.103916	0.103416	0.901841	0.090463	0.00769572	1.28786e-16	105	450	3000	20.2602	0.103916	0.103416	0.862468	0.097278	0.00623998	0.0340141
106	574.387	7875.5	1.05962	0.104916	0.104416	0.900508	0.0926201	0.00687167	2.93099e-16	106	450	3000	20.2602	0.104916	0.104416	0.86621	0.0998258	0.00605775	0.027907
107	575.523	7920.93	1.12273	0.105916	0.105416	0.89898	0.0948998	0.0061199	3.88578e-17	107	450	3000	20.2602	0.105916	0.105416	0.86907	0.102478	0.00587465	0.0225777
108	576.703	7968.12	1.1883	0.106916	0.106416	0.897251	0.0973128	0.00543605	1.5099e-16	108	450	3000	20.2602	0.106916	0.106416	0.871057	0.105244	0.00569082	0.0180083
109	577.931	8017.25	1.25655	0.107916	0.107416	0.895313	0.0998709	0.00481579	3.66374e-17	109	450	3000	20.2602	0.107916	0.107416	0.8722	0.108135	0.00550646	0.0141579
110	579.212	8068.48	1.3277	0.108916	0.108416	0.893159	0.102586	0.0042549	2.67564e-16	110	450	3000	20.2602	0.108916	0.108416	0.872548	0.111161	0.00532181	0.0109697
111	580.549	8121.97	1.40202	0.109916	0.109416	0.890778	0.105473	0.00374918	1.19904e-16	111	450	3000	20.2602	0.109916	0.109416	0.872159	0.114328	0.00513714	0.00837531
112	581.948	8177.92	1.47974	0.110916	0.110416	0.888159	0.108546	0.00329458	1.2379e-16	112	450	3000	20.2602	0.110916	0.110416	0.871104	0.117643	0.00495274	0.0063003
113	583.413	8236.52	1.56114	0.111916	0.111416	0.88529	0.111823	0.00288718	-6.93889e-17	113	450	3000	20.2602	0.111916	0.111416	0.869457	0.121105	0.0047689	0.00466912
114	584.949	8297.96	1.64649	0.112916	0.112416	0.882157	0.11532	0.00252315	1.08247e-16	114	450	3000	20.2602	0.112916	0.112416	0.867295	0.124711	0.00458587	0.00340869
115	586.561	8362.45	1.73608	0.113916	0.113416	0.878744	0.119057	0.00219891	1.29063e-16	115	450	3000	20.2602	0.113916	0.113416	0.864696	0.128449	0.00440393	0.00245128
116	588.255	8430.2	1.8302	0.114916	0.114416	0.875034	0.123055	0.00191099	1.34059e-16	116	450	3000	20.2602	0.114916	0.114416	0.861736	0.132305	0.0042233	0.00173632
117	590.036	8501.43	1.92915	0.115916	0.115416	0.871007	0.127337	0.0016561	2.48968e-16	117	450	3000	20.2602	0.115916	0.115416	0.858489	0.136256	0.00404418	0.00121137
118	591.909	8576.35	2.03328	0.116916	0.116416	0.866641	0.131928	0.00143116	4.71845e-17	118	450	3000	20.2602	0.116916	0.116416	0.855025	0.140276	0.00386677	0.000832394
119	593.879	8655.16	2.14284	0.117916	0.117416	0.861913	0.136853	0.00123328	1.69864e-16	119	450	3000	20.2602	0.117916	0.117416	0.85141	0.144335	0.00369124	0.000563361
120	595.952	8738.08	2.25804	0.118916	0.118416	0.8568	0.142141	0.00105976	4.48253e-17	120	450	3000	20.2602	0.118916	0.118416	0.847709	0.148398	0.00351773	0.000375543
121	598.133	8825.3	2.37912	0.119916	0.119416	0.851273	0.147819	0.000908085	9.11771e-17	121	450	3000	20.2602	0.119916	0.119416	0.843977	0.15243	0.00334636	0.000246586
122	600.425	8917	2.50643	0.120916	0.120416	0.845305	0.153919	0.000775922	1.82215e-16	122	450	3000	20.2602	0.120916	0.120416	0.84027	0.156394	0.00317723	0.0001595
123	602.833	9013.33	2.64016	0.121916	0.121416	0.838868	0.160471	0.000661132	1.59178e-16	123	450	3000	20.2602	0.121916	0.121416	0.836633	0.160255	0.00301041	0.000101656
124	605.36	9114.39	2.78048	0.122916	0.122416	0.831931	0.167507	0.000561755	2.18159e-16	124	450	3000	20.2602	0.122916	0.122416	0.833111	0.163979	0.00284596	6.38742e-05
125	607.603	9204.11	2.90504	0.123765	0.123341	0.825621	0.173891	0.000487334	2.01783e-16	125	450	3000	20.2602	0.123765	0.123341	0.829986	0.167276	0.00269608	4.09754e-05
126	618.935	9612.73	3.53451	0.12452	0.124142	0.806994	0.192586	0.000420047	3.74076e-16	126	450	3000	20.2602	0.12452	0.124142	0.827398	0.170007	0.00256775	2.75074e-05
127	618.953	9613.34	3.53549	0.125517	0.125018	0.807034	0.192599	0.000366931	4.37705e-16	127	450	3000	20.2602	0.125517	0.125018	0.824711	0.172842	0.00242932	1.76039e-05
128	618.969	9613.9	3.53637	0.126517	0.126017	0.807071	0.192611	0.000318329	9.5729e-16	128	450	3000	20.2602	0.126517	0.126017	0.821841	0.175874	0.00227376	1.0468e-05
129	618.983	9614.41	3.53718	0.127519	0.127018	0.807104	0.192621	0.000274128	3.65818e-16	129	450	3000	20.2602	0.127519	0.127018	0.819181	0.178693	0.00212022	6.12559e-06
130	618.996	9614.87	3.53791	0.128518	0.128019	0.807135	0.192631	0.000234367	1.99632e-16	130	450	3000	20.2602	0.128518	0.128019	0.816738	0.181289	0.00196913	3.53305e-06
131	619.008	9615.28	3.53856	0.129517	0.129018	0.807162	0.19264	0.000198701	4.15154e-16	131	450	3000	20.2602	0.129517	0.129018	0.814512	0.183666	0.00182058	2.00953e-06
132	619.019	9615.65	3.53915	0.130522	0.13002	0.807186	0.192647	0.000166811	2.17291e-16	132	450	3000	20.2602	0.130522	0.13002	0.812481	0.185844	0.00167387	1.12472e-06
133	619.028	9615.98	3.53966	0.131521	0.131021	0.807207	0.192654	0.000138756	3.27047e-16	133	450	3000	20.2602	0.131521	0.131021	0.810637	0.187833	0.00152936	6.20369e-07
134	619.036	9616.26	3.54011	0.132525	0.132023	0.807226	0.19266	0.000114072	1.96076e-16	134	450	3000	20.2602	0.132525	0.132023	0.808962	0.189651	0.00138701	3.37266e-07
135	619.043	9616.51	3.5405	0.133523	0.133024	0.807242	0.192665	9.27544e-05	4.87249e-16	135	450	3000	20.2602	0.133523	0.133024	0.807435	0.191318	0.00124683	1.80806e-07
136	619.049	9616.72	3.54084	0.134521	0.134022	0.807256	0.192669	7.4421e-05	7.79498e-16	136	450	3000	20.2602	0.134521	0.134022	0.806039	0.192851	0.00110911	9.57326e-08
137	619.054	9616.9	3.54112	0.135516	0.135019	0.807268	0.192673	5.88775e-05	2.55308e-16	137	450	3000	20.2602	0.135516	0.135019	0.804751	0.194275	0.000973617	5.00309e-08
138	619.059	9617.05	3.54136	0.136515	0.136015	0.807278	0.192676	4.5763e-05	5.98809e-16	138	450	3000	20.2602	0.136515	0.136015	0.803548	0.195612	0.00083999	2.57769e-08
139	619.062	9617.17	3.54156	0.137512	0.137014	0.807286	0.192679	3.49262e-05	9.54705e-17	139	450	3000	20.2602	0.137512	0.137014	0.802411	0.196881	0.000708064	1.30891e-08
140	619.065	9617.28	3.54173	0.138523	0.138017	0.807293	0.192681	2.59907e-05	9.8194e-17	140	450	3000	20.2602	0.138523	0.138017	0.801323	0.1981	0.000577253	6.54205e-09
141	619.067	9617.36	3.54185	0.139526	0.139024	0.807298	0.192683	1.89051e-05	4.48281e-16	141	450	3000	20.2602	0.139526	0.139024	0.800274	0.199278	0.000447883	3.23969e-09
142	619.068	9617.39	3.5419	0.139901	0.139714	0.8073	0.192683	1.63644e-05	1.81652e-16	142	450	3000	20.2602	0.139901	0.139714	0.799575	0.200065	0.000360364	1.94985e-09
143	625.172	9831.01	3.88096	0.140901	0.140401	0.79662	0.203369	1.07309e-05	1.42036e-15	143	450	3000	20.2602	0.140901	0.140401	0.79889	0.200836	0.000273914	1.14977e-09
144	626.392	9873.73	3.94875	0.141092	0.140997	0.794445	0.205546	9.73991e-06	1.80752e-15	144	450	3000	20.2602	0.141092	0.140997	0.798306	0.201494	0.00019973	6.94371e-10
145	626.406	9874.2	3.94951	0.141092	0.141092	0.794445	0.205545	9.73972e-06	1.80752e-16	145	450	3000	20.2602	0.141092	0.141092	0.798213	0.201599	0.000187901	6.34038e-10
146	647.664	10441.6	5.13042	0.142091	0.141592	0.796116	0.203878	6.28762e-06	5.29524e-17	146	450	3000	20.2602	0.142091	0.141592	0.797729	0.202144	0.000126227	3.70382e-10
147	647.683	10442.1	5.13146	0.14309	0.14259	0.796775	0.203221	4.18016e-06	5.29524e-17	147	450	3000	20.2602	0.14309	0.14259	0.796775	0.203221	4.18016e-06	4.16871e-10
Bozdag Path 3_5: Primary										Bozdag Path 3_5: Diffused
Shell	temperature (｡C	) pressure (bar)	tot.time (my)	radius (cm)	X(node) (cm)	Xfe	Xmg	Xmn	Xca	hell	temperature (｡C	) pressure (bar)	tot.time (my)	radius (cm)	X(node) (cm)	Xfe	Xmg	Xmn	Xca
1	556.26	7187.79	0.0525832	0.0010012	0.000500598	0.723979	0.0686037	0.0267683	0.180649	1	450	3000	20.2602	0.0010012	0.000500598	0.740898	0.0711881	0.00671643	0.181197
2	556.301	7189.02	0.0548454	0.00200138	0.00150129	0.72405	0.0687596	0.0264994	0.180691	2	450	3000	20.2602	0.00200138	0.00150129	0.740896	0.07119	0.00671463	0.181199
3	556.343	7190.28	0.0571856	0.00300201	0.00250169	0.724121	0.0689217	0.0262233	0.180734	3	450	3000	20.2602	0.00300201	0.00250169	0.740887	0.071198	0.00670686	0.181208
4	556.386	7191.59	0.0596068	0.00400288	0.00350244	0.724193	0.0690901	0.0259397	0.180777	4	450	3000	20.2602	0.00400288	0.00350244	0.740873	0.0712099	0.00669493	0.181222
5	556.431	7192.94	0.0621084	0.00500246	0.00450267	0.724264	0.069265	0.025649	0.180822	5	450	3000	20.2602	0.00500246	0.00450267	0.740856	0.0712248	0.00667921	0.18124
6	556.478	7194.34	0.0646949	0.00600241	0.00550244	0.724335	0.0694467	0.0253509	0.180867	6	450	3000	20.2602	0.00600241	0.00550244	0.740836	0.0712418	0.00665987	0.181262
7	556.526	7195.79	0.0673696	0.00700257	0.00650249	0.724405	0.0696356	0.0250453	0.180914	7	450	3000	20.2602	0.00700257	0.00650249	0.740815	0.0712602	0.00663698	0.181288
8	556.576	7197.28	0.0701346	0.00800281	0.00750269	0.724475	0.0698318	0.0247322	0.180961	8	450	3000	20.2602	0.00800281	0.00750269	0.740793	0.0712791	0.00661059	0.181317
9	556.628	7198.83	0.0729913	0.00900261	0.00850271	0.724543	0.0700357	0.0244116	0.181009	9	450	3000	20.2602	0.00900261	0.00850271	0.740771	0.0712979	0.00658078	0.18135
10	556.681	7200.42	0.0759447	0.0100032	0.00950293	0.72461	0.0702477	0.0240834	0.181058	10	450	3000	20.2602	0.0100032	0.00950293	0.74075	0.0713156	0.00654759	0.181387
11	556.736	7202.07	0.0789968	0.011004	0.0105036	0.724676	0.0704679	0.0237477	0.181109	11	450	3000	20.2602	0.011004	0.0105036	0.740731	0.0713316	0.00651107	0.181426
12	556.793	7203.78	0.0821491	0.0120045	0.0115043	0.724739	0.0706968	0.0234046	0.181159	12	450	3000	20.2602	0.0120045	0.0115043	0.740715	0.0713452	0.00647129	0.181468
13	556.848	7205.44	0.0852203	0.0129295	0.012467	0.724796	0.0709212	0.0230744	0.181208	13	450	3000	20.2602	0.0129295	0.012467	0.740703	0.0713556	0.00643	0.181512
14	556.862	7205.86	0.0860062	0.0139318	0.0134306	0.72505	0.0709076	0.0227748	0.181267	14	450	3000	20.2602	0.0139318	0.0134306	0.740694	0.0713629	0.00638579	0.181557
15	556.877	7206.3	0.0868236	0.0149335	0.0144327	0.725315	0.0708932	0.0224622	0.181329	15	450	3000	20.2602	0.0149335	0.0144327	0.74069	0.0713669	0.00633681	0.181606
16	556.892	7206.75	0.0876583	0.0159317	0.0154326	0.725586	0.0708784	0.0221429	0.181393	16	450	3000	20.2602	0.0159317	0.0154326	0.740692	0.071367	0.00628493	0.181656
17	556.907	7207.22	0.0885119	0.0169298	0.0164307	0.725863	0.0708633	0.0218163	0.181457	17	450	3000	20.2602	0.0169298	0.0164307	0.7407	0.0713629	0.00623026	0.181707
18	556.923	7207.69	0.0893852	0.0179279	0.0174288	0.726147	0.0708478	0.0214822	0.181523	18	450	3000	20.2602	0.0179279	0.0174288	0.740716	0.0713547	0.00617277	0.181756
19	556.939	7208.17	0.0902787	0.0189271	0.0184275	0.726436	0.070832	0.0211402	0.181591	19	450	3000	20.2602	0.0189271	0.0184275	0.740742	0.0713423	0.00611252	0.181803
20	556.955	7208.66	0.0911929	0.0199279	0.0194275	0.726733	0.0708158	0.0207902	0.181661	20	450	3000	20.2602	0.0199279	0.0194275	0.740781	0.0713255	0.00604956	0.181844
21	556.972	7209.17	0.0921265	0.0209282	0.0204281	0.727036	0.0707993	0.0204327	0.181732	21	450	3000	20.2602	0.0209282	0.0204281	0.740836	0.0713046	0.00598401	0.181876
22	556.989	7209.68	0.0930779	0.021927	0.0214276	0.727345	0.0707824	0.0200684	0.181804	22	450	3000	20.2602	0.021927	0.0214276	0.740912	0.0712795	0.0059161	0.181893
23	557.007	7210.21	0.0940494	0.0229279	0.0224274	0.727661	0.0707652	0.0196962	0.181878	23	450	3000	20.2602	0.0229279	0.0224274	0.741016	0.0712506	0.00584586	0.181887
24	557.025	7210.74	0.0950376	0.0239257	0.0234268	0.727982	0.0707477	0.0193176	0.181953	24	450	3000	20.2602	0.0239257	0.0234268	0.74116	0.0712182	0.00577348	0.181849
25	557.043	7211.29	0.096044	0.0249245	0.0244251	0.728309	0.0707298	0.0189319	0.182029	25	450	3000	20.2602	0.0249245	0.0244251	0.741354	0.071183	0.00569915	0.181763
26	557.061	7211.84	0.0970693	0.0259245	0.0254245	0.728642	0.0707116	0.0185389	0.182107	26	450	3000	20.2602	0.0259245	0.0254245	0.741619	0.0711462	0.00562286	0.181612
27	557.08	7212.41	0.0981137	0.0269263	0.0264254	0.728982	0.070693	0.0181384	0.182187	27	450	3000	20.2602	0.0269263	0.0264254	0.741974	0.0711096	0.00554475	0.181371
28	557.099	7212.98	0.0991726	0.0279245	0.0274254	0.729326	0.0706742	0.0177323	0.182267	28	450	3000	20.2602	0.0279245	0.0274254	0.742449	0.0710757	0.00546522	0.18101
29	557.119	7213.56	0.100249	0.0289255	0.028425	0.729677	0.0706551	0.0173192	0.182349	29	450	3000	20.2602	0.0289255	0.028425	0.743075	0.0710485	0.00538442	0.180492
30	557.138	7214.15	0.101342	0.0299261	0.0294258	0.730032	0.0706356	0.0168998	0.182432	30	450	3000	20.2602	0.0299261	0.0294258	0.743895	0.0710331	0.00530247	0.17977
31	557.158	7214.75	0.102449	0.0309251	0.0304256	0.730393	0.0706159	0.0164749	0.182517	31	450	3000	20.2602	0.0309251	0.0304256	0.744952	0.0710363	0.0052198	0.178792
32	557.179	7215.36	0.103571	0.0319245	0.0314248	0.730758	0.0705959	0.0160444	0.182602	32	450	3000	20.2602	0.0319245	0.0314248	0.746298	0.0710667	0.00513663	0.177498
33	557.199	7215.97	0.104706	0.032924	0.0324243	0.731127	0.0705757	0.0156084	0.182688	33	450	3000	20.2602	0.032924	0.0324243	0.747991	0.0711347	0.00505316	0.175821
34	557.22	7216.59	0.105857	0.0339256	0.0334248	0.731502	0.0705552	0.0151664	0.182776	34	450	3000	20.2602	0.0339256	0.0334248	0.750092	0.0712528	0.00496959	0.173686
35	557.241	7217.22	0.107018	0.0349251	0.0344254	0.731881	0.0705344	0.0147202	0.182865	35	450	3000	20.2602	0.0349251	0.0344254	0.752657	0.071435	0.00488626	0.171022
36	557.262	7217.85	0.108191	0.0359255	0.0354253	0.732263	0.0705135	0.0142694	0.182954	36	450	3000	20.2602	0.0359255	0.0354253	0.755741	0.0716963	0.00480346	0.167759
37	557.283	7218.49	0.109372	0.0369234	0.0364245	0.732648	0.0704924	0.0138153	0.183044	37	450	3000	20.2602	0.0369234	0.0364245	0.75939	0.0720523	0.00472139	0.163837
38	557.305	7219.14	0.110565	0.0379248	0.0374241	0.733037	0.0704711	0.0133566	0.183135	38	450	3000	20.2602	0.0379248	0.0374241	0.763644	0.0725191	0.00464012	0.159197
39	557.326	7219.78	0.111765	0.0389235	0.0384241	0.733428	0.0704496	0.0128952	0.183227	39	450	3000	20.2602	0.0389235	0.0384241	0.768525	0.0731116	0.00455973	0.153804
40	557.348	7220.44	0.11297	0.0399219	0.0394227	0.733821	0.0704281	0.0124314	0.183319	40	450	3000	20.2602	0.0399219	0.0394227	0.774023	0.0738414	0.0044804	0.147656
41	557.37	7221.09	0.114183	0.0409233	0.0404226	0.734217	0.0704063	0.0119643	0.183412	41	450	3000	20.2602	0.0409233	0.0404226	0.78013	0.0747206	0.00440187	0.140747
42	557.392	7221.75	0.115402	0.0419243	0.0414238	0.734615	0.0703845	0.0114953	0.183505	42	450	3000	20.2602	0.0419243	0.0414238	0.786801	0.0757568	0.00432403	0.133118
43	557.414	7222.41	0.116623	0.0429254	0.0424249	0.735014	0.0703626	0.0110252	0.183598	43	450	3000	20.2602	0.0429254	0.0424249	0.793953	0.0769516	0.0042468	0.124849
44	557.436	7223.07	0.117844	0.0439256	0.0434255	0.735413	0.0703407	0.0105547	0.183692	44	450	3000	20.2602	0.0439256	0.0434255	0.801483	0.0783036	0.00416997	0.116043
45	557.458	7223.73	0.119065	0.044926	0.0444258	0.735812	0.0703188	0.0100842	0.183785	45	450	3000	20.2602	0.044926	0.0444258	0.809272	0.0798079	0.00409325	0.106827
46	557.48	7224.39	0.120284	0.0459268	0.0454264	0.73621	0.0702969	0.00961433	0.183879	46	450	3000	20.2602	0.0459268	0.0454264	0.817185	0.0814576	0.00401627	0.0973415
47	557.502	7225.05	0.121497	0.0469251	0.0464259	0.736607	0.0702751	0.00914656	0.183972	47	450	3000	20.2602	0.0469251	0.0464259	0.825061	0.08324	0.00393882	0.0877599
48	557.508	7225.24	0.121854	0.0469911	0.0469581	0.736723	0.0702687	0.00900897	0.183999	48	450	3000	20.2602	0.0469911	0.0469581	0.829181	0.0842392	0.00389723	0.0826829
49	572.009	7780.36	0.927462	0.0479907	0.0474909	0.898898	0.0886083	0.0124934	1.17684e-16	49	450	3000	20.2602	0.0479907	0.0474909	0.833229	0.0852727	0.00385532	0.0776429
50	572.069	7782.74	0.930776	0.0489906	0.0484906	0.899979	0.0885586	0.0114622	1.08802e-16	50	450	3000	20.2602	0.0489906	0.0484906	0.840564	0.0872973	0.00377579	0.068363
51	572.112	7784.49	0.933205	0.0499901	0.0494903	0.900772	0.088522	0.0107057	2.28706e-16	51	450	3000	20.2602	0.0499901	0.0494903	0.847416	0.0894236	0.00369487	0.0594652
52	572.155	7786.21	0.935584	0.0509895	0.0504898	0.901549	0.0884862	0.00996469	1.29896e-16	52	450	3000	20.2602	0.0509895	0.0504898	0.853661	0.091644	0.00361239	0.0510822
53	572.197	7787.88	0.937908	0.0519898	0.0514897	0.902309	0.0884511	0.00924026	1.88738e-16	53	450	3000	20.2602	0.0519898	0.0514897	0.8592	0.0939558	0.00352819	0.0433158
54	572.234	7789.37	0.939974	0.0528973	0.0524436	0.902984	0.0884199	0.00859624	2.32037e-16	54	450	3000	20.2602	0.0528973	0.0524436	0.863751	0.096245	0.00344623	0.0365574
55	573.292	7831.69	0.998762	0.0538973	0.0533973	0.901841	0.090463	0.00769572	1.28786e-16	55	450	3000	20.2602	0.0538973	0.0533973	0.867541	0.0986183	0.0033627	0.0304777
56	574.387	7875.5	1.05962	0.0548973	0.0543973	0.900508	0.0926201	0.00687167	2.93099e-16	56	450	3000	20.2602	0.0548973	0.0543973	0.870674	0.101203	0.00327346	0.0248495
57	575.523	7920.93	1.12273	0.0558973	0.0553973	0.89898	0.0948998	0.0061199	3.88578e-17	57	450	3000	20.2602	0.0558973	0.0553973	0.872943	0.103895	0.00318263	0.0199793
58	576.703	7968.12	1.1883	0.0568973	0.0563973	0.897251	0.0973128	0.00543605	1.5099e-16	58	450	3000	20.2602	0.0568973	0.0563973	0.874368	0.106704	0.00309036	0.0158373
59	577.931	8017.25	1.25655	0.0578973	0.0573973	0.895313	0.0998709	0.00481579	3.66374e-17	59	450	3000	20.2602	0.0578973	0.0573973	0.874988	0.10964	0.00299682	0.0123748
60	579.212	8068.48	1.3277	0.0588973	0.0583973	0.893159	0.102586	0.0042549	2.67564e-16	60	450	3000	20.2602	0.0588973	0.0583973	0.874856	0.112712	0.00290221	0.00952989
61	580.549	8121.97	1.40202	0.0598973	0.0593973	0.890778	0.105473	0.00374918	1.19904e-16	61	450	3000	20.2602	0.0598973	0.0593973	0.874035	0.115926	0.00280674	0.00723226
62	581.948	8177.92	1.47974	0.0608974	0.0603973	0.888159	0.108546	0.00329458	1.2379e-16	62	450	3000	20.2602	0.0608974	0.0603973	0.872596	0.119285	0.0027106	0.0054081
63	583.413	8236.52	1.56114	0.0618973	0.0613974	0.88529	0.111823	0.00288718	-6.93889e-17	63	450	3000	20.2602	0.0618973	0.0613974	0.870613	0.122788	0.00261402	0.00398437
64	584.949	8297.96	1.64649	0.0628974	0.0623974	0.882157	0.11532	0.00252315	1.08247e-16	64	450	3000	20.2602	0.0628974	0.0623974	0.868162	0.126429	0.00251718	0.00289192
65	586.561	8362.45	1.73608	0.0638973	0.0633974	0.878744	0.119057	0.00219891	1.29063e-16	65	450	3000	20.2602	0.0638973	0.0633974	0.865318	0.130194	0.00242028	0.00206775
66	588.255	8430.2	1.8302	0.0648973	0.0643973	0.875034	0.123055	0.00191099	1.34059e-16	66	450	3000	20.2602	0.0648973	0.0643973	0.862153	0.134067	0.0023235	0.00145639
67	590.036	8501.43	1.92915	0.0658973	0.0653973	0.871007	0.127337	0.0016561	2.48968e-16	67	450	3000	20.2602	0.0658973	0.0653973	0.858739	0.138024	0.002227	0.00101043
68	591.909	8576.35	2.03328	0.0668973	0.0663973	0.866641	0.131928	0.00143116	4.71845e-17	68	450	3000	20.2602	0.0668973	0.0663973	0.855141	0.142038	0.00213093	0.000690511
69	593.879	8655.16	2.14284	0.0678973	0.0673973	0.861913	0.136853	0.00123328	1.69864e-16	69	450	3000	20.2602	0.0678973	0.0673973	0.851423	0.146076	0.00203543	0.000464815
70	595.952	8738.08	2.25804	0.0688973	0.0683973	0.8568	0.142141	0.00105976	4.48253e-17	70	450	3000	20.2602	0.0688973	0.0683973	0.847645	0.150106	0.00194062	0.000308206
71	598.133	8825.3	2.37912	0.0698973	0.0693973	0.851273	0.147819	0.000908085	9.11771e-17	71	450	3000	20.2602	0.0698973	0.0693973	0.843862	0.15409	0.00184663	0.000201316
72	600.425	8917	2.50643	0.0708973	0.0703973	0.845305	0.153919	0.000775922	1.82215e-16	72	450	3000	20.2602	0.0708973	0.0703973	0.840123	0.157994	0.00175354	0.000129549
73	602.833	9013.33	2.64016	0.0718974	0.0713973	0.838868	0.160471	0.000661132	1.59178e-16	73	450	3000	20.2602	0.0718974	0.0713973	0.836473	0.161783	0.00166145	8.21521e-05
74	605.36	9114.39	2.78048	0.0728973	0.0723973	0.831931	0.167507	0.000561755	2.18159e-16	74	450	3000	20.2602	0.0728973	0.0723973	0.832952	0.165427	0.00157042	5.13659e-05
75	607.603	9204.11	2.90504	0.0737462	0.0733218	0.825621	0.173891	0.000487334	2.01783e-16	75	450	3000	20.2602	0.0737462	0.0733218	0.829839	0.168641	0.00148728	3.28033e-05
76	618.935	9612.73	3.53451	0.0745009	0.0741236	0.806994	0.192586	0.000420047	3.74076e-16	76	450	3000	20.2602	0.0745009	0.0741236	0.827266	0.171296	0.00141598	2.19344e-05
77	618.953	9613.34	3.53549	0.0754984	0.0749996	0.807034	0.192599	0.000366931	4.37705e-16	77	450	3000	20.2602	0.0754984	0.0749996	0.824601	0.174046	0.00133897	1.39777e-05
78	618.969	9613.9	3.53637	0.0764985	0.0759984	0.807071	0.192611	0.000318329	9.5729e-16	78	450	3000	20.2602	0.0764985	0.0759984	0.82176	0.17698	0.00125233	8.27274e-06
79	618.983	9614.41	3.53718	0.0775007	0.0769996	0.807104	0.192621	0.000274128	3.65818e-16	79	450	3000	20.2602	0.0775007	0.0769996	0.819129	0.1797	0.00116674	4.81869e-06
80	618.996	9614.87	3.53791	0.0784995	0.0780001	0.807135	0.192631	0.000234367	1.99632e-16	80	450	3000	20.2602	0.0784995	0.0780001	0.816715	0.182199	0.00108249	2.76668e-06
81	619.008	9615.28	3.53856	0.0794987	0.0789991	0.807162	0.19264	0.000198701	4.15154e-16	81	450	3000	20.2602	0.0794987	0.0789991	0.814515	0.184484	0.00099965	1.56663e-06
82	619.019	9615.65	3.53915	0.080503	0.0800008	0.807186	0.192647	0.000166811	2.17291e-16	82	450	3000	20.2602	0.080503	0.0800008	0.812505	0.186576	0.000917884	8.72982e-07
83	619.028	9615.98	3.53966	0.0815022	0.0810026	0.807207	0.192654	0.000138756	3.27047e-16	83	450	3000	20.2602	0.0815022	0.0810026	0.810678	0.188484	0.00083742	4.79439e-07
84	619.036	9616.26	3.54011	0.0825065	0.0820044	0.807226	0.19266	0.000114072	1.96076e-16	84	450	3000	20.2602	0.0825065	0.0820044	0.809013	0.190229	0.000758265	2.59544e-07
85	619.043	9616.51	3.5405	0.0835046	0.0830056	0.807242	0.192665	9.27544e-05	4.87249e-16	85	450	3000	20.2602	0.0835046	0.0830056	0.807491	0.191828	0.000680464	1.3856e-07
86	619.049	9616.72	3.54084	0.0845027	0.0840037	0.807256	0.192669	7.4421e-05	7.79498e-16	86	450	3000	20.2602	0.0845027	0.0840037	0.806094	0.193301	0.000604212	7.30648e-08
87	619.054	9616.9	3.54112	0.0854972	0.0849999	0.807268	0.192673	5.88775e-05	2.55308e-16	87	450	3000	20.2602	0.0854972	0.0849999	0.804801	0.194669	0.000529402	3.80312e-08
88	619.059	9617.05	3.54136	0.0864961	0.0859967	0.807278	0.192676	4.5763e-05	5.98809e-16	88	450	3000	20.2602	0.0864961	0.0859967	0.803589	0.195955	0.000455869	1.95171e-08
89	619.062	9617.17	3.54156	0.0874935	0.0869948	0.807286	0.192679	3.49262e-05	9.54705e-17	89	450	3000	20.2602	0.0874935	0.0869948	0.802443	0.197174	0.000383551	9.87214e-09
90	619.065	9617.28	3.54173	0.0885038	0.0879987	0.807293	0.192681	2.59907e-05	9.8194e-17	90	450	3000	20.2602	0.0885038	0.0879987	0.801343	0.198345	0.000312159	4.91552e-09
91	619.067	9617.36	3.54185	0.0895074	0.0890056	0.807298	0.192683	1.89051e-05	4.48281e-16	91	450	3000	20.2602	0.0895074	0.0890056	0.800283	0.199475	0.000241901	2.42564e-09
92	619.068	9617.39	3.5419	0.0898826	0.089695	0.8073	0.192683	1.63644e-05	1.81652e-16	92	450	3000	20.2602	0.0898826	0.089695	0.799578	0.200227	0.000194591	1.45619e-09
93	625.172	9831.01	3.88096	0.0908826	0.0903826	0.79662	0.203369	1.07309e-05	1.42036e-15	93	450	3000	20.2602	0.0908826	0.0903826	0.798889	0.200963	0.000148048	8.56516e-10
94	626.392	9873.73	3.94875	0.0910734	0.090978	0.794445	0.205546	9.73991e-06	1.80752e-15	94	450	3000	20.2602	0.0910734	0.090978	0.798303	0.201589	0.000108267	5.16107e-10
95	626.406	9874.2	3.94951	0.0910734	0.0910734	0.794445	0.205545	9.73972e-06	1.80752e-15	95	450	3000	20.2602	0.0910734	0.0910734	0.79821	0.201689	0.000101939	4.71103e-10
96	647.664	10441.6	5.13042	0.0920723	0.0915728	0.796116	0.203878	6.28762e-06	5.29524e-17	96	450	3000	20.2602	0.0920723	0.0915728	0.797726	0.202205	6.90082e-05	2.74592e-10
97	647.683	10442.1	5.13146	0.093071	0.0925716	0.796775	0.203221	4.18016e-06	5.29524e-17	97	450	3000	20.2602	0.093071	0.0925716	0.796775	0.203221	4.18016e-06	4.16871e-10
Bozdag Path 3_6: Primary										Bozdag Path 3_6: Diffused
Shell	temperature (｡C	) pressure (bar)	tot.time (my)	radius (cm)	X(node) (cm)	Xfe	Xmg	Xmn	Xca	hell	temperature (｡C	) pressure (bar)	tot.time (my)	radius (cm)	X(node) (cm)	Xfe	Xmg	Xmn	Xca
1	557.08	7212.41	0.0981137	0.00100174	0.00050087	0.728982	0.070693	0.0181384	0.182187	1	450	3000	20.2602	0.00100174	0.00050087	0.752821	0.0707537	0.00125879	0.175167
2	557.099	7212.98	0.0991726	0.00199993	0.00150083	0.729326	0.0706742	0.0177323	0.182267	2	450	3000	20.2602	0.00199993	0.00150083	0.752976	0.0707625	0.00125845	0.175003
3	557.119	7213.56	0.100249	0.003001	0.00250046	0.729677	0.0706551	0.0173192	0.182349	3	450	3000	20.2602	0.003001	0.00250046	0.753651	0.0708016	0.00125701	0.174291
4	557.138	7214.15	0.101342	0.00400153	0.00350126	0.730032	0.0706356	0.0168998	0.182432	4	450	3000	20.2602	0.00400153	0.00350126	0.754713	0.0708679	0.0012548	0.173164
5	557.158	7214.75	0.102449	0.00500054	0.00450104	0.730393	0.0706159	0.0164749	0.182517	5	450	3000	20.2602	0.00500054	0.00450104	0.756159	0.070967	0.00125194	0.171622
6	557.179	7215.36	0.103571	0.00600001	0.00550027	0.730758	0.0705959	0.0160444	0.182602	6	450	3000	20.2602	0.00600001	0.00550027	0.758011	0.0711076	0.00124846	0.169633
7	557.199	7215.97	0.104706	0.00699944	0.00649972	0.731127	0.0705757	0.0156084	0.182688	7	450	3000	20.2602	0.00699944	0.00649972	0.760303	0.0713008	0.00124441	0.167152
8	557.22	7216.59	0.105857	0.0080011	0.00750027	0.731502	0.0705552	0.0151664	0.182776	8	450	3000	20.2602	0.0080011	0.00750027	0.763071	0.0715591	0.00123982	0.16413
9	557.241	7217.22	0.107018	0.00900052	0.00850081	0.731881	0.0705344	0.0147202	0.182865	9	450	3000	20.2602	0.00900052	0.00850081	0.766347	0.0718956	0.00123472	0.160523
10	557.262	7217.85	0.108191	0.010001	0.00950076	0.732263	0.0705135	0.0142694	0.182954	10	450	3000	20.2602	0.010001	0.00950076	0.770154	0.0723239	0.00122915	0.156293
11	557.283	7218.49	0.109372	0.0109989	0.0104999	0.732648	0.0704924	0.0138153	0.183044	11	450	3000	20.2602	0.0109989	0.0104999	0.774508	0.0728571	0.00122312	0.151411
12	557.305	7219.14	0.110565	0.0120003	0.0114996	0.733037	0.0704711	0.0133566	0.183135	12	450	3000	20.2602	0.0120003	0.0114996	0.779418	0.073508	0.00121664	0.145857
13	557.326	7219.78	0.111765	0.0129989	0.0124996	0.733428	0.0704496	0.0128952	0.183227	13	450	3000	20.2602	0.0129989	0.0124996	0.784871	0.0742876	0.00120968	0.139632
14	557.348	7220.44	0.11297	0.0139973	0.0134981	0.733821	0.0704281	0.0124314	0.183319	14	450	3000	20.2602	0.0139973	0.0134981	0.790824	0.0752023	0.00120225	0.132771
15	557.37	7221.09	0.114183	0.0149988	0.0144981	0.734217	0.0704063	0.0119643	0.183412	15	450	3000	20.2602	0.0149988	0.0144981	0.797242	0.0762602	0.00119429	0.125303
16	557.392	7221.75	0.115402	0.0159998	0.0154993	0.734615	0.0703845	0.0114953	0.183505	16	450	3000	20.2602	0.0159998	0.0154993	0.804053	0.0774639	0.00118573	0.117297
17	557.414	7222.41	0.116623	0.0170008	0.0165003	0.735014	0.0703626	0.0110252	0.183598	17	450	3000	20.2602	0.0170008	0.0165003	0.811155	0.0788106	0.00117654	0.108858
18	557.436	7223.07	0.117844	0.0180011	0.017501	0.735413	0.0703407	0.0105547	0.183692	18	450	3000	20.2602	0.0180011	0.017501	0.818436	0.0802957	0.00116665	0.100102
19	557.458	7223.73	0.119065	0.0190015	0.0185013	0.735812	0.0703188	0.0100842	0.183785	19	450	3000	20.2602	0.0190015	0.0185013	0.825773	0.0819124	0.00115596	0.0911589
20	557.48	7224.39	0.120284	0.0200022	0.0195018	0.73621	0.0702969	0.00961433	0.183879	20	450	3000	20.2602	0.0200022	0.0195018	0.833039	0.0836529	0.00114441	0.0821641
21	557.502	7225.05	0.121497	0.0210006	0.0205014	0.736607	0.0702751	0.00914656	0.183972	21	450	3000	20.2602	0.0210006	0.0205014	0.84009	0.0855052	0.00113193	0.0732726
22	557.508	7225.24	0.121854	0.0210666	0.0210336	0.736723	0.0702687	0.00900897	0.183999	22	450	3000	20.2602	0.0210666	0.0210336	0.843707	0.0865339	0.00112488	0.0686341
23	572.009	7780.36	0.927462	0.0220661	0.0215663	0.898898	0.0886083	0.0124934	1.17684e-16	23	450	3000	20.2602	0.0220661	0.0215663	0.84721	0.087591	0.00111753	0.0640815
24	572.069	7782.74	0.930776	0.023066	0.0225661	0.899979	0.0885586	0.0114622	1.08802e-16	24	450	3000	20.2602	0.023066	0.0225661	0.853427	0.0896481	0.00110292	0.0558223
25	572.112	7784.49	0.933205	0.0240655	0.0235658	0.900772	0.088522	0.0107057	2.28706e-16	25	450	3000	20.2602	0.0240655	0.0235658	0.859072	0.0917951	0.0010872	0.0480455
26	572.155	7786.21	0.935584	0.025065	0.0245653	0.901549	0.0884862	0.00996469	1.29896e-16	26	450	3000	20.2602	0.025065	0.0245653	0.864058	0.0940283	0.00107037	0.0408435
27	572.197	7787.88	0.937908	0.0260653	0.0255651	0.902309	0.0884511	0.00924026	1.88738e-16	27	450	3000	20.2602	0.0260653	0.0255651	0.86832	0.096349	0.00105238	0.0342791
28	572.234	7789.37	0.939974	0.0269727	0.026519	0.902984	0.0884199	0.00859624	2.32037e-16	28	450	3000	20.2602	0.0269727	0.026519	0.871667	0.0986464	0.00103418	0.0286523
29	573.292	7831.69	0.998762	0.0279727	0.0274727	0.901841	0.090463	0.00769572	1.28786e-16	29	450	3000	20.2602	0.0279727	0.0274727	0.874293	0.10103	0.00101498	0.023662
30	574.387	7875.5	1.05962	0.0289727	0.0284727	0.900508	0.0926201	0.00687167	2.93099e-16	30	450	3000	20.2602	0.0289727	0.0284727	0.876271	0.103629	0.000993816	0.0191056
31	575.523	7920.93	1.12273	0.0299727	0.0294727	0.89898	0.0948998	0.0061199	3.88578e-17	31	450	3000	20.2602	0.0299727	0.0294727	0.877472	0.106341	0.000971641	0.0152157
32	576.703	7968.12	1.1883	0.0309727	0.0304727	0.897251	0.0973128	0.00543605	1.5099e-16	32	450	3000	20.2602	0.0309727	0.0304727	0.877927	0.109175	0.000948521	0.0119496
33	577.931	8017.25	1.25655	0.0319728	0.0314727	0.895313	0.0998709	0.00481579	3.66374e-17	33	450	3000	20.2602	0.0319728	0.0314727	0.877683	0.112139	0.000924523	0.00925276
34	579.212	8068.48	1.3277	0.0329728	0.0324728	0.893159	0.102586	0.0042549	2.67564e-16	34	450	3000	20.2602	0.0329728	0.0324728	0.876796	0.115242	0.000899725	0.00706281
35	580.549	8121.97	1.40202	0.0339728	0.0334728	0.890778	0.105473	0.00374918	1.19904e-16	35	450	3000	20.2602	0.0339728	0.0334728	0.875326	0.118486	0.000874203	0.00531395
36	581.948	8177.92	1.47974	0.0349728	0.0344728	0.888159	0.108546	0.00329458	1.2379e-16	36	450	3000	20.2602	0.0349728	0.0344728	0.873339	0.121872	0.000848036	0.00394038
37	583.413	8236.52	1.56114	0.0359728	0.0354728	0.88529	0.111823	0.00288718	-6.93889e-17	37	450	3000	20.2602	0.0359728	0.0354728	0.870903	0.125396	0.000821302	0.00287938
38	584.949	8297.96	1.64649	0.0369728	0.0364728	0.882157	0.11532	0.00252315	1.08247e-16	38	450	3000	20.2602	0.0369728	0.0364728	0.868085	0.129048	0.000794077	0.00207332
39	586.561	8362.45	1.73608	0.0379728	0.0374728	0.878744	0.119057	0.00219891	1.29063e-16	39	450	3000	20.2602	0.0379728	0.0374728	0.86495	0.132812	0.000766437	0.001471
40	588.255	8430.2	1.8302	0.0389728	0.0384728	0.875034	0.123055	0.00191099	1.34059e-16	40	450	3000	20.2602	0.0389728	0.0384728	0.861563	0.13667	0.000738454	0.00102829
41	590.036	8501.43	1.92915	0.0399728	0.0394728	0.871007	0.127337	0.0016561	2.48968e-16	41	450	3000	20.2602	0.0399728	0.0394728	0.857985	0.140597	0.000710195	0.000708202
42	591.909	8576.35	2.03328	0.0409728	0.0404728	0.866641	0.131928	0.00143116	4.71845e-17	42	450	3000	20.2602	0.0409728	0.0404728	0.854275	0.144563	0.000681726	0.000480533
43	593.879	8655.16	2.14284	0.0419728	0.0414728	0.861913	0.136853	0.00123328	1.69864e-16	43	450	3000	20.2602	0.0419728	0.0414728	0.85049	0.148536	0.000653111	0.000321232
44	595.952	8738.08	2.25804	0.0429728	0.0424728	0.8568	0.142141	0.00105976	4.48253e-17	44	450	3000	20.2602	0.0429728	0.0424728	0.846681	0.152483	0.000624409	0.000211567
45	598.133	8825.3	2.37912	0.0439728	0.0434728	0.851273	0.147819	0.000908085	9.11771e-17	45	450	3000	20.2602	0.0439728	0.0434728	0.842898	0.156369	0.000595676	0.000137288
46	600.425	8917	2.50643	0.0449728	0.0444728	0.845305	0.153919	0.000775922	1.82215e-16	46	450	3000	20.2602	0.0449728	0.0444728	0.839186	0.16016	0.000566964	8.77855e-05
47	602.833	9013.33	2.64016	0.0459728	0.0454728	0.838868	0.160471	0.000661132	1.59178e-16	47	450	3000	20.2602	0.0459728	0.0454728	0.835583	0.163824	0.00053832	5.53251e-05
48	605.36	9114.39	2.78048	0.0469728	0.0464728	0.831931	0.167507	0.000561755	2.18159e-16	48	450	3000	20.2602	0.0469728	0.0464728	0.832123	0.167332	0.00050979	3.43867e-05
49	607.603	9204.11	2.90504	0.0478217	0.0473972	0.825621	0.173891	0.000487334	2.01783e-16	49	450	3000	20.2602	0.0478217	0.0473972	0.829078	0.170417	0.000483553	2.18416e-05
50	618.935	9612.73	3.53451	0.0485764	0.048199	0.806994	0.192586	0.000420047	3.74076e-16	50	450	3000	20.2602	0.0485764	0.048199	0.826568	0.172956	0.000460928	1.4536e-05
51	618.953	9613.34	3.53549	0.0495738	0.0490751	0.807034	0.192599	0.000366931	4.37705e-16	51	450	3000	20.2602	0.0495738	0.0490751	0.823976	0.175579	0.000436368	9.21651e-06
52	618.969	9613.9	3.53637	0.0505739	0.0500739	0.807071	0.192611	0.000318329	9.5729e-16	52	450	3000	20.2602	0.0505739	0.0500739	0.821218	0.178368	0.000408596	5.42497e-06
53	618.983	9614.41	3.53718	0.0515761	0.051075	0.807104	0.192621	0.000274128	3.65818e-16	53	450	3000	20.2602	0.0515761	0.051075	0.818667	0.180949	0.00038103	3.14304e-06
54	618.996	9614.87	3.53791	0.052575	0.0520756	0.807135	0.192631	0.000234367	1.99632e-16	54	450	3000	20.2602	0.052575	0.0520756	0.81633	0.183315	0.00035378	1.79521e-06
55	619.008	9615.28	3.53856	0.0535741	0.0530745	0.807162	0.19264	0.000198701	4.15154e-16	55	450	3000	20.2602	0.0535741	0.0530745	0.814197	0.185475	0.000326894	1.01139e-06
56	619.019	9615.65	3.53915	0.0545784	0.0540763	0.807186	0.192647	0.000166811	2.17291e-16	56	450	3000	20.2602	0.0545784	0.0540763	0.812248	0.187451	0.000300279	5.60797e-07
57	619.028	9615.98	3.53966	0.0555777	0.0550781	0.807207	0.192654	0.000138756	3.27047e-16	57	450	3000	20.2602	0.0555777	0.0550781	0.810471	0.189255	0.000274032	3.06504e-07
58	619.036	9616.26	3.54011	0.056582	0.0560798	0.807226	0.19266	0.000114072	1.96076e-16	58	450	3000	20.2602	0.056582	0.0560798	0.808847	0.190904	0.000248174	1.65146e-07
59	619.043	9616.51	3.5405	0.0575801	0.057081	0.807242	0.192665	9.27544e-05	4.87249e-16	59	450	3000	20.2602	0.0575801	0.057081	0.807358	0.192419	0.000222739	8.77619e-08
60	619.049	9616.72	3.54084	0.0585782	0.0580791	0.807256	0.192669	7.4421e-05	7.79498e-16	60	450	3000	20.2602	0.0585782	0.0580791	0.805986	0.193816	0.000197811	4.60721e-08
61	619.054	9616.9	3.54112	0.0595727	0.0590754	0.807268	0.192673	5.88775e-05	2.55308e-16	61	450	3000	20.2602	0.0595727	0.0590754	0.80471	0.195116	0.000173373	2.38773e-08
62	619.059	9617.05	3.54136	0.0605716	0.0600721	0.807278	0.192676	4.5763e-05	5.98809e-16	62	450	3000	20.2602	0.0605716	0.0600721	0.803511	0.19634	0.000149389	1.22017e-08
63	619.062	9617.17	3.54156	0.0615689	0.0610703	0.807286	0.192679	3.49262e-05	9.54705e-17	63	450	3000	20.2602	0.0615689	0.0610703	0.802373	0.197501	0.000125856	6.14647e-09
64	619.065	9617.28	3.54173	0.0625793	0.0620741	0.807293	0.192681	2.59907e-05	9.8194e-17	64	450	3000	20.2602	0.0625793	0.0620741	0.801281	0.198616	0.000102697	3.04833e-09
65	619.067	9617.36	3.54185	0.0635829	0.0630811	0.807298	0.192683	1.89051e-05	4.48281e-16	65	450	3000	20.2602	0.0635829	0.0630811	0.800229	0.199691	7.99982e-05	1.49881e-09
66	619.068	9617.39	3.5419	0.0639581	0.0637705	0.8073	0.192683	1.63644e-05	1.81652e-16	66	450	3000	20.2602	0.0639581	0.0637705	0.79953	0.200405	6.47756e-05	8.97364e-10
67	625.172	9831.01	3.88096	0.064958	0.0644581	0.79662	0.203369	1.07309e-05	1.42036e-15	67	450	3000	20.2602	0.064958	0.0644581	0.798849	0.201101	4.98575e-05	5.26485e-10
68	626.392	9873.73	3.94875	0.0651488	0.0650534	0.794445	0.205546	9.73991e-06	1.80752e-15	68	450	3000	20.2602	0.0651488	0.0650534	0.798271	0.201692	3.7157e-05	3.16487e-10
69	626.406	9874.2	3.94951	0.0651488	0.0651488	0.794445	0.205545	9.73972e-06	1.80752e-15	69	450	3000	20.2602	0.0651488	0.0651488	0.79818	0.201785	3.51412e-05	2.88753e-10
70	647.664	10441.6	5.13042	0.0661477	0.0656483	0.796116	0.203878	6.28762e-06	5.29524e-17	70	450	3000	20.2602	0.0661477	0.0656483	0.797704	0.202271	2.46738e-05	1.67944e-10
71	647.683	10442.1	5.13146	0.0671465	0.0666471	0.796775	0.203221	4.18016e-06	5.29524e-17	71	450	3000	20.2602	0.0671465	0.0666471	0.796775	0.203221	4.18016e-06	4.16871e-10
